# Supplementary material for: Mechanistic insights into l-proline-catalyzed transamidation of carboxamide with benzylamine from density functional theory calculations
Source: Royal Society of Chemistry journal article supplement (doi:10.1039/c4ra04105d), 2014-01-01
Supplement: c4ra04105d1.pdf [file c4ra04105d1.pdf]

Supporting Information

**Mechanistic Insights into L-Proline-Catalyzed Transamidation of  
Carboxamide with Benzylamine from the Density Functional  
Calculations**

Xin Yang, Linlin Fan, Ying Xue\*

College of Chemistry,

Key Lab of Green Chemistry and Technology in Ministry of Education,

Sichuan University, Chengdu 610064,

People's Republic of China

## Contents

|                                                                                                                                                                                                                                                  |    |
|--------------------------------------------------------------------------------------------------------------------------------------------------------------------------------------------------------------------------------------------------|----|
| <i>Figure S1.</i> Schematic structures of the species in the trasamidation of 1a with 2a in step “Activation of the acetamide”.                                                                                                                  | 3  |
| <i>Figure S2.</i> Schematic structures of the species in the trasamidation of 1a with 2a in step “C-N bond formation”.                                                                                                                           | 4  |
| <i>Figure S3.</i> Schematic structures of the species in the trasamidation of 1a with 2a in step “elimination”.                                                                                                                                  | 5  |
| <i>Figure S4.</i> Schematic structures of the species in the trasamidation of 1a with 2a in step “hydrolysis”.                                                                                                                                   | 6  |
| <i>Figure S5.</i> Energy profile through intermediate EtOH-7 of L-proline–catalyzed trasamidation of 1a with 2a in EtOH. The relative free energies at M06/6-311+G(2d,p)//M06/6-31+G(d,p) level are given in kcal/mol.                           | 7  |
| <i>Figure S6.</i> Energy profile through intermediate EtOH-8 of L-proline–catalyzed trasamidation of 1a with 2a in EtOH. The relative free energies at M06/6-311+G(2d,p)//M06/6-31+G(d,p) level are given in kcal/mol.                           | 8  |
| <i>Figure S7.</i> Energy profile through intermediate EtOH-12 of L-proline–catalyzed trasamidation of 1a with 2a in EtOH. The relative free energies at M06/6-311+G(2d,p)//M06/6-31+G(d,p) level are given in kcal/mol.                          | 9  |
| <i>Figure S8.</i> Energy profile through intermediate EtOH-18 of L-proline–catalyzed trasamidation of 1a with 2a in EtOH. The relative free energies at M06/6-311+G(2d,p)//M06/6-31+G(d,p) level are given in kcal/mol.                          | 10 |
| <i>Figure S9.</i> Energy profile through intermediate H <sub>2</sub> O-7 of L-proline–catalyzed trasamidation of 1a with 2a in H <sub>2</sub> O. The relative free energies at M06/6-311+G(2d,p)//M06/6-31+G(d,p) level are given in kcal/mol.   | 11 |
| <i>Figure S10.</i> Energy profile through intermediate H <sub>2</sub> O-8 of L-proline–catalyzed trasamidation of 1a with 2a in H <sub>2</sub> O. The relative free energies at M06/6-311+G(2d,p)//M06/6-31+G(d,p) level are given in kcal/mol.  | 12 |
| <i>Figure S11.</i> Energy profile through intermediate H <sub>2</sub> O-12 of L-proline–catalyzed trasamidation of 1a with 2a in H <sub>2</sub> O. The relative free energies at M06/6-311+G(2d,p)//M06/6-31+G(d,p) level are given in kcal/mol. | 13 |
| <i>Figure S12.</i> Energy profile through intermediate H <sub>2</sub> O-18 of L-proline–catalyzed trasamidation of 1a with 2a in H <sub>2</sub> O. The relative free energies at M06/6-311+G(2d,p)//M06/6-31+G(d,p) level are given in kcal/mol. | 14 |
| <i>Figure S13.</i> Energy profile through intermediate S-7 of L-proline–catalyzed trasamidation of 1m with 2a in toluene. The relative free energies at M06/6-311+G(2d,p)//M06/6-31+G(d,p) level are given in kcal/mol.                          | 15 |
| <i>Figure S14.</i> Energy profile through intermediate S-8 of L-proline–catalyzed trasamidation of 1m with 2a in toluene. The relative free energies at M06/6-311+G(2d,p)//M06/6-31+G(d,p) level are given in kcal/mol.                          | 16 |
| <i>Figure S15.</i> Energy profile through intermediate S-12 of L-proline–catalyzed trasamidation of 1m with 2a in toluene. The relative free energies at M06/6-311+G(2d,p)//M06/6-31+G(d,p) level are given in kcal/mol.                         | 17 |
| Cartesian Coordinates of all stationary points                                                                                                                                                                                                   | 18 |

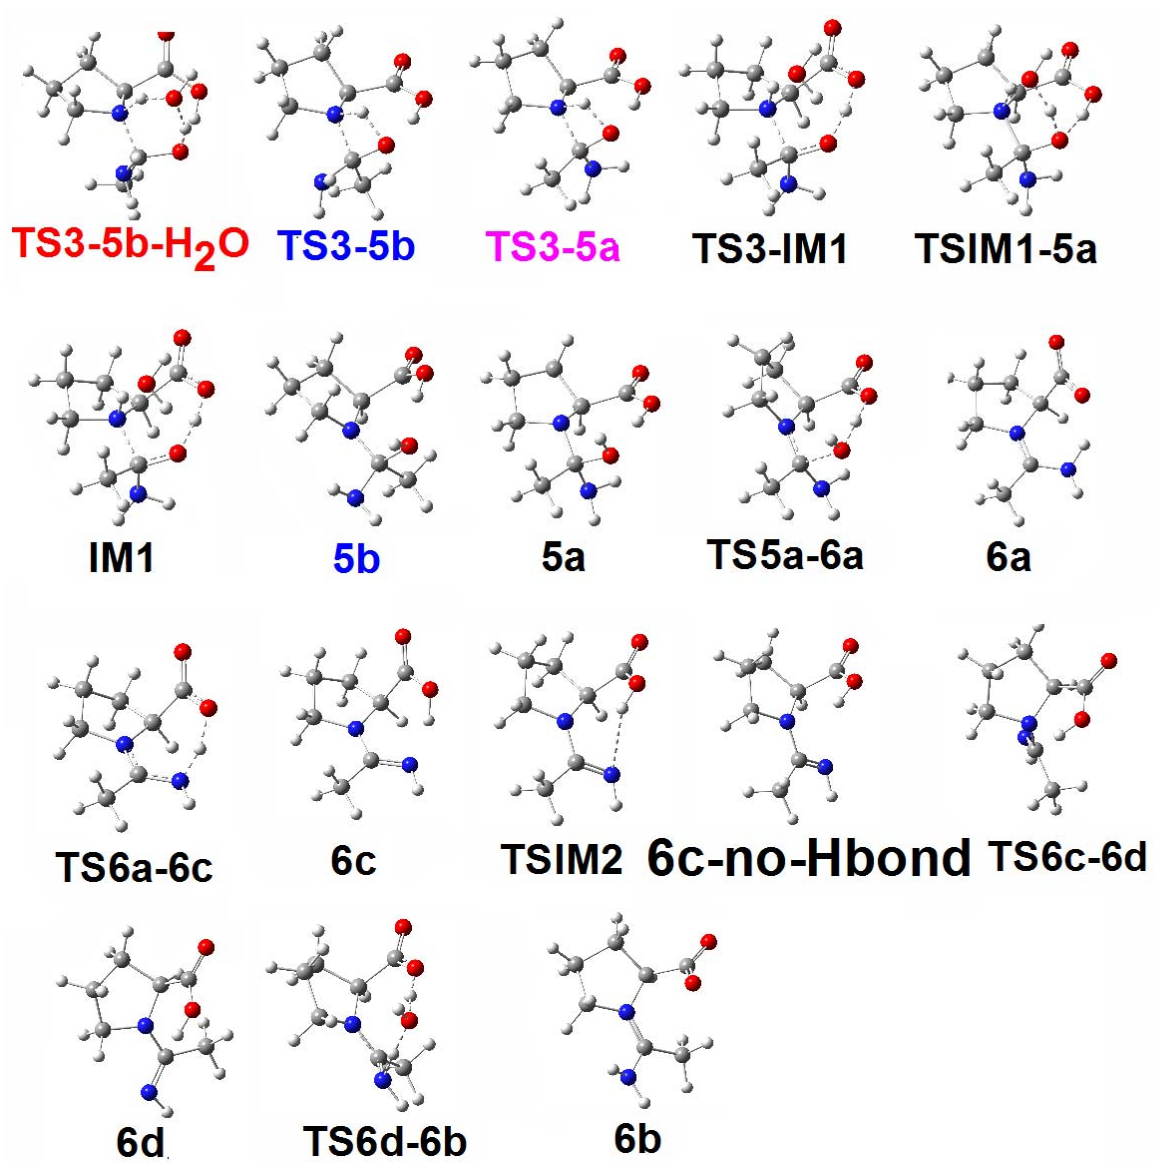

*Figure S1.* Schematic structures of the species in the transamidation of 1a with 2a in step “Activation of the acetamide”.

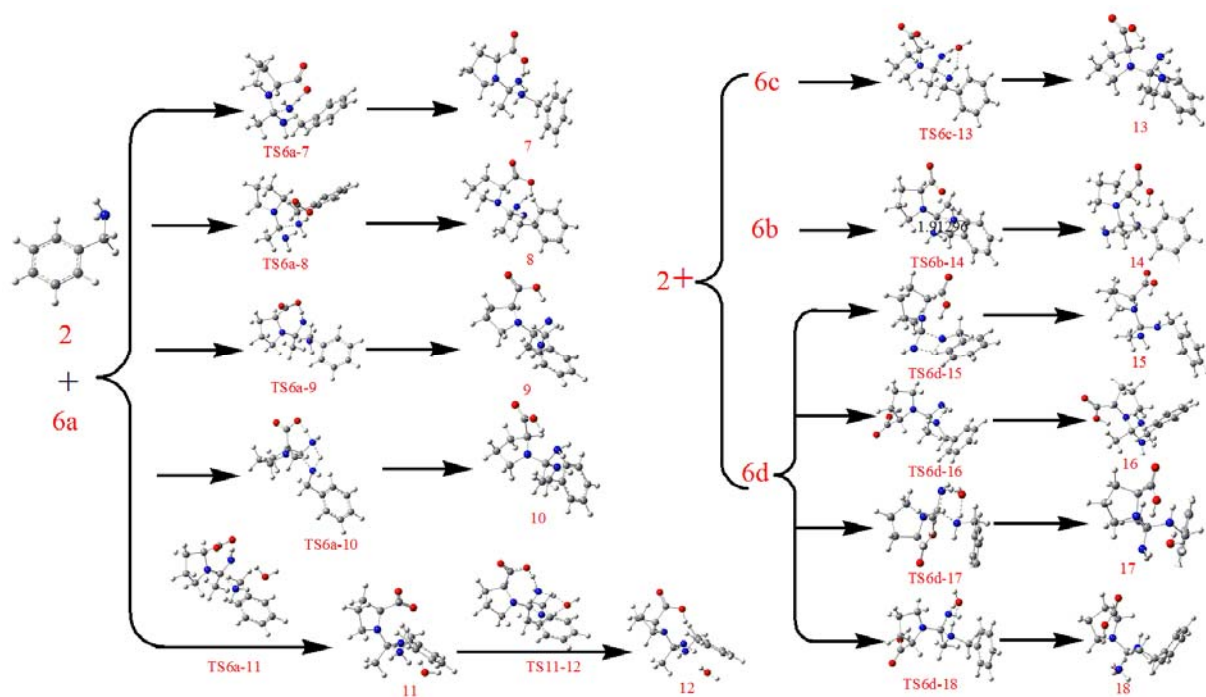

**Figure S2.** Schematic structures of the species in the trasamidation of **1a** with **2a** in step “C-N bond formation”.

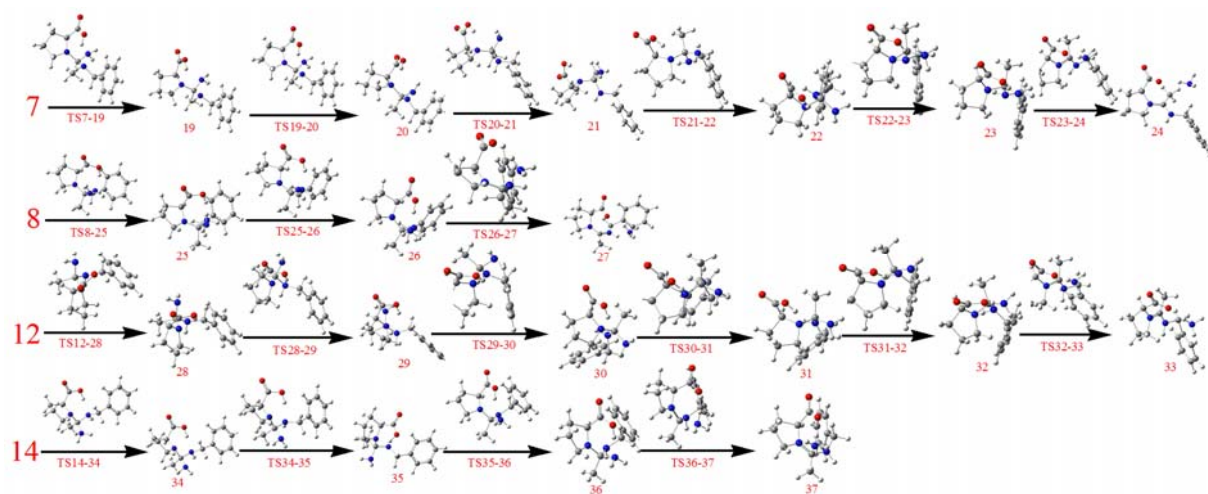

**Figure S3.** Schematic structures of the species in the trasamidation of **1a** with **2a** in step “elimination”.

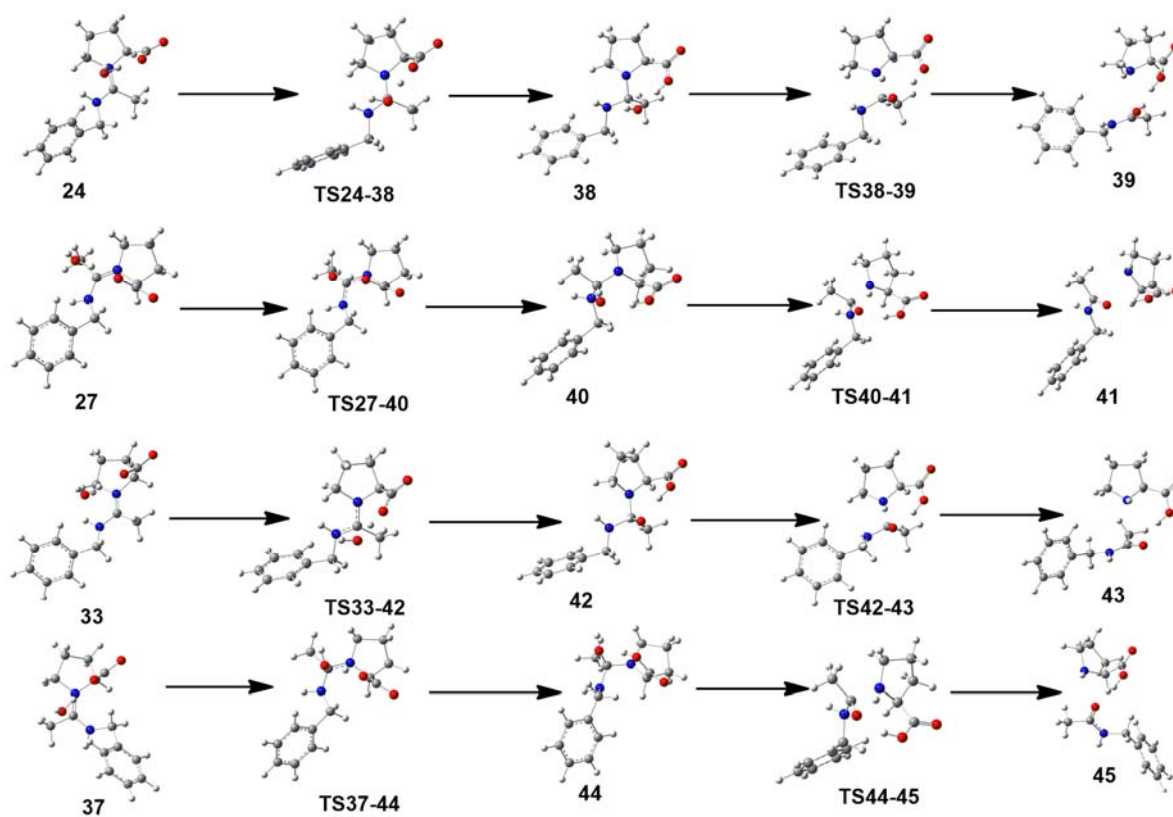

*Figure S4.* Schematic structures of the species in the trasamidation of **1a** with **2a** in step “hydrolysis”.

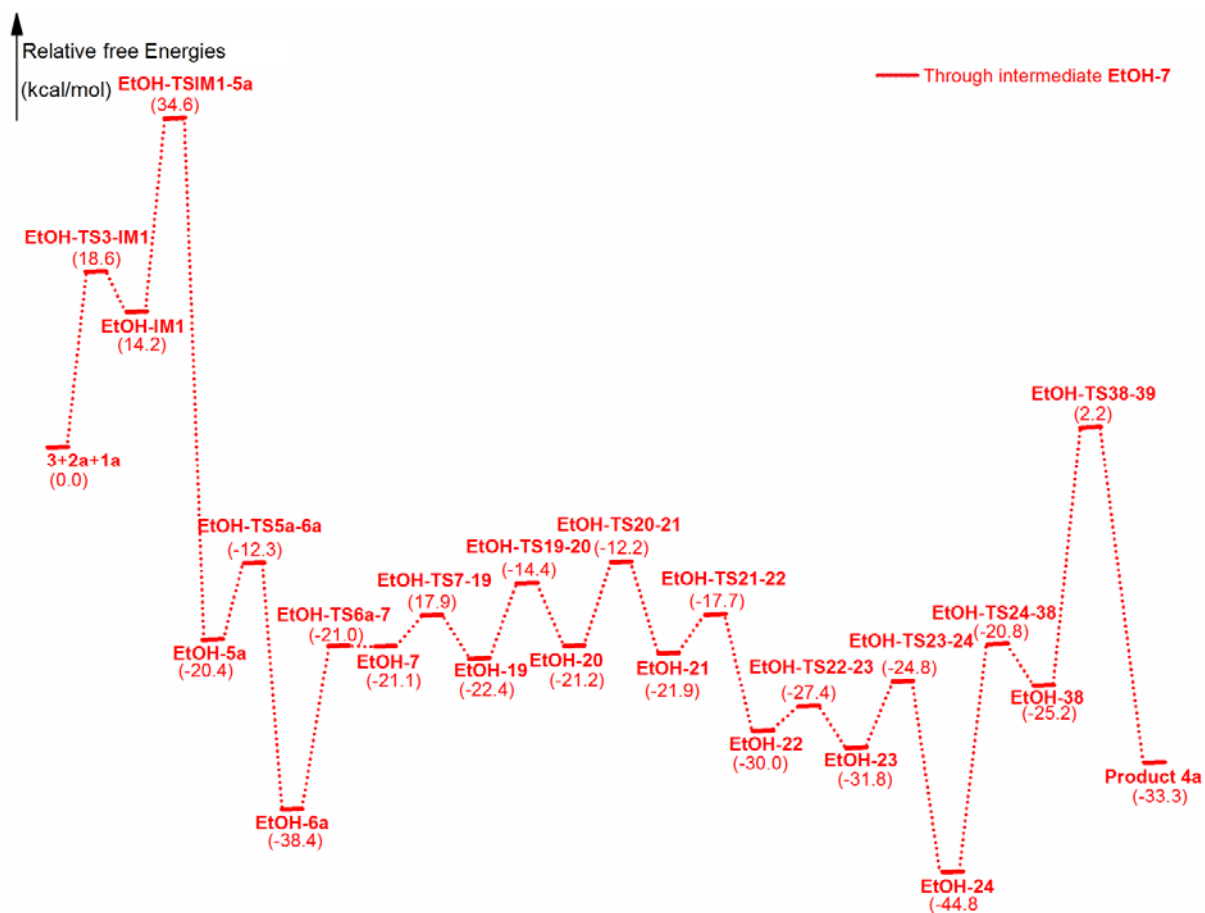

**Figure S5.** Energy profile through intermediate **EtOH-7** of L-proline-catalyzed trasamidation of **1a** with **2a** in EtOH . The relative free energies at M06/6-311+G(2d,p)//M06/6-31+G(d,p) level are given in kcal/mol.

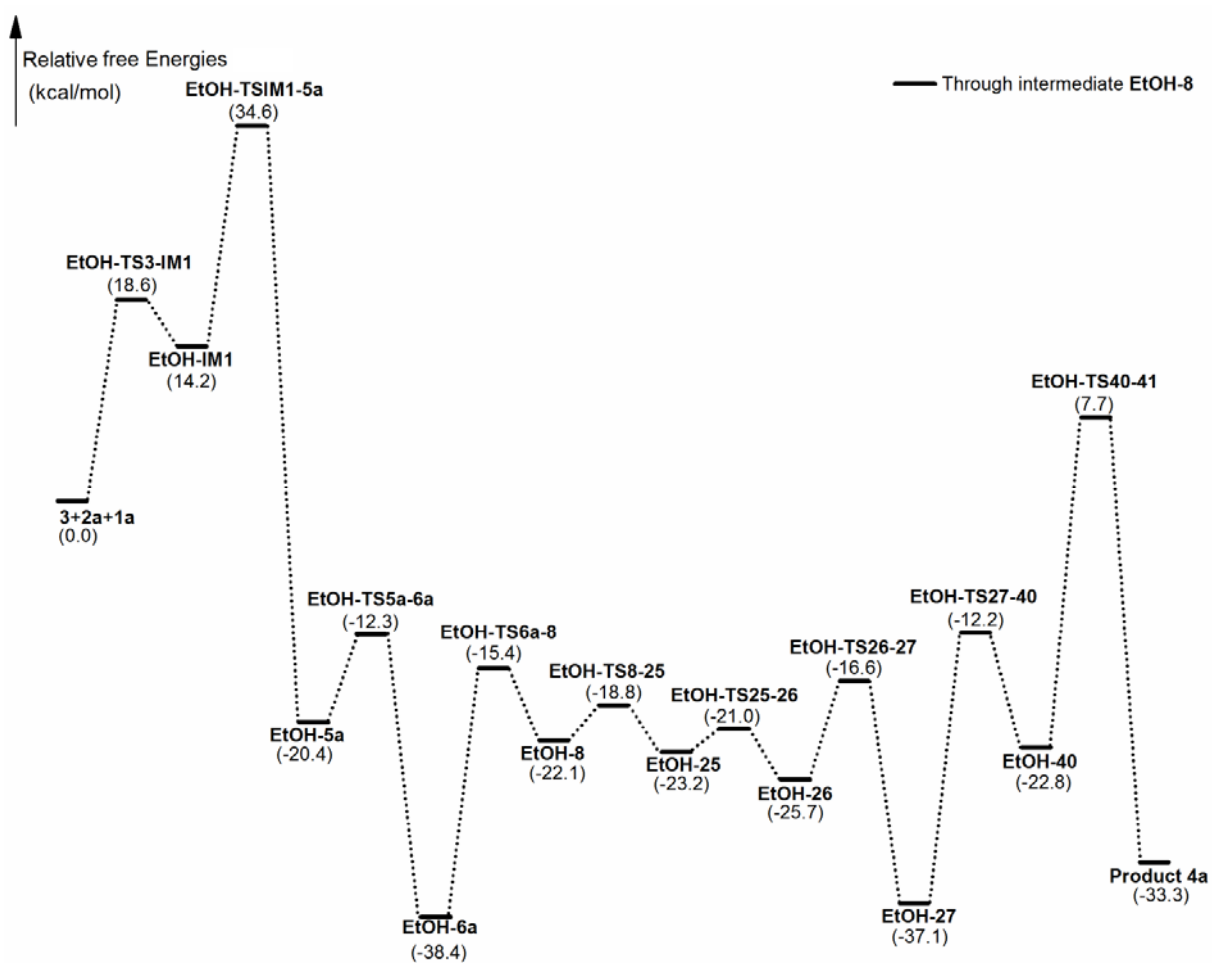

**Figure S6.** Energy profile through intermediate **EtOH-8** of L-proline-catalyzed trasamidation of **1a** with **2a** in EtOH. The relative free energies at M06/6-311+G(2d,p)//M06/6-31+G(d,p) level are given in kcal/mol.



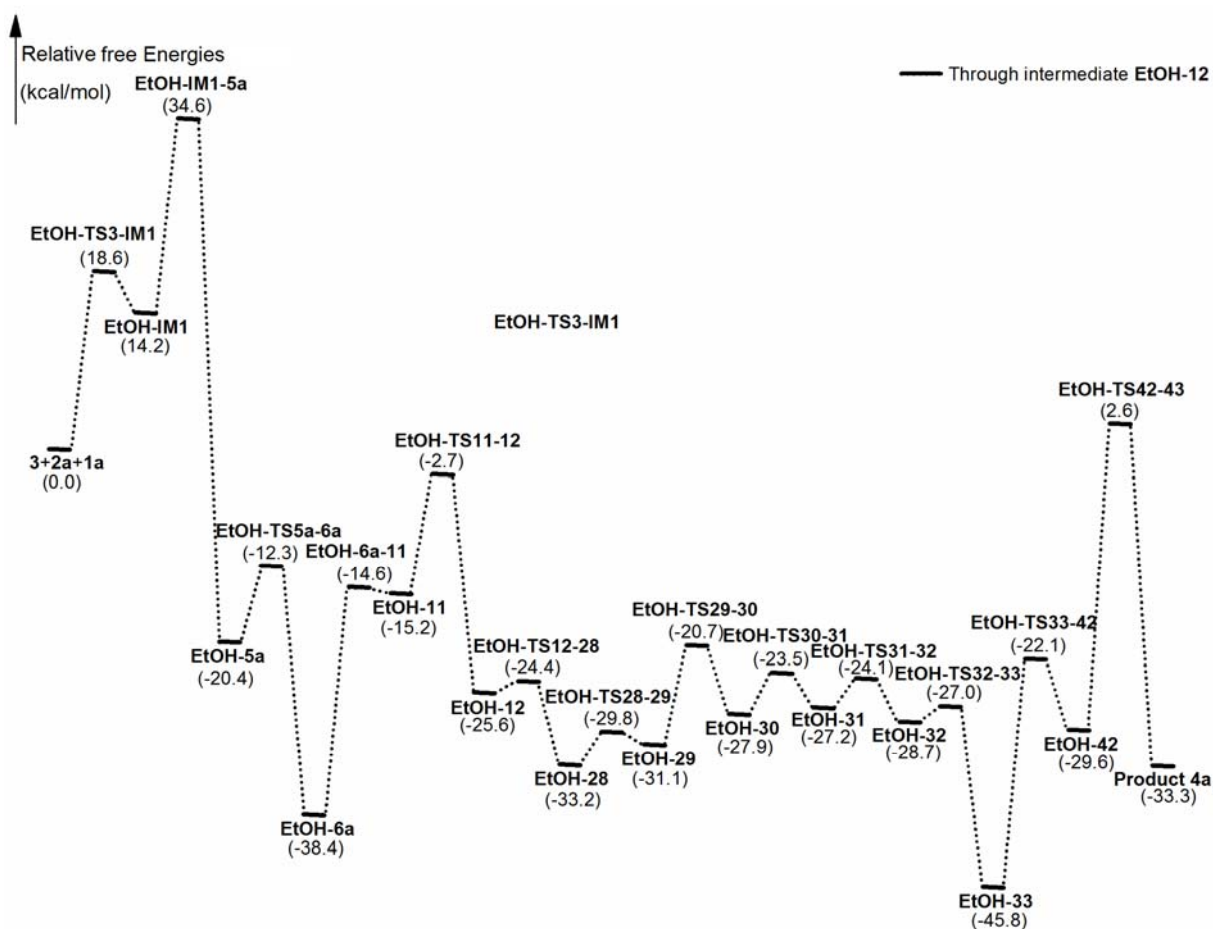

**Figure S7.** Energy profile through intermediate **EtOH-12** of L-proline-catalyzed trasamidation of **1a** with **2a** in EtOH. The relative free energies at M06/6-311+G(2d,p)/M06/6-31+G(d,p) level are given in kcal/mol.

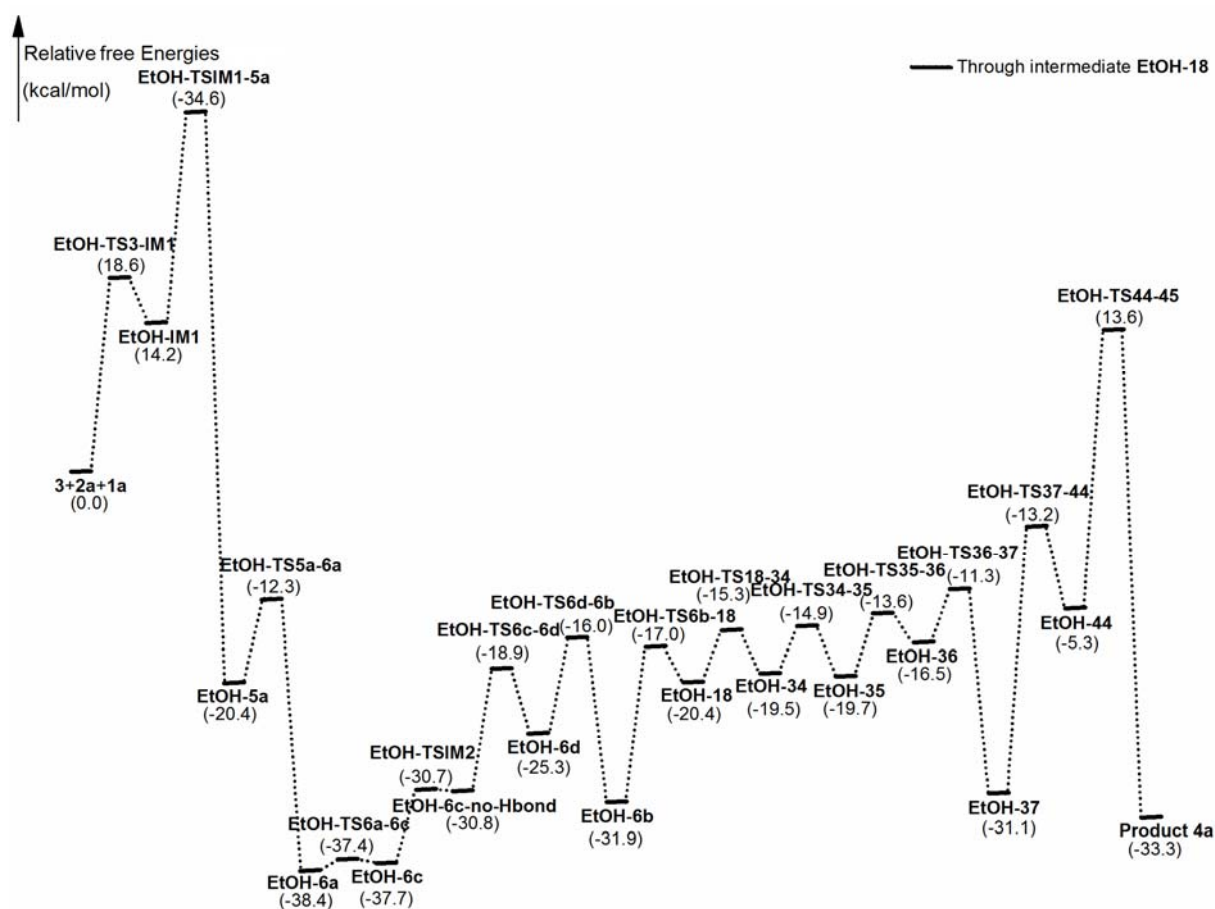

**Figure S8.** Energy profile through intermediate **EtOH-18** of L-proline-catalyzed transamidation of **1a** with **2a** in EtOH. The relative free energies at M06/6-311+G(2d,p)/M06/6-31+G(d,p) level are given in kcal/mol.

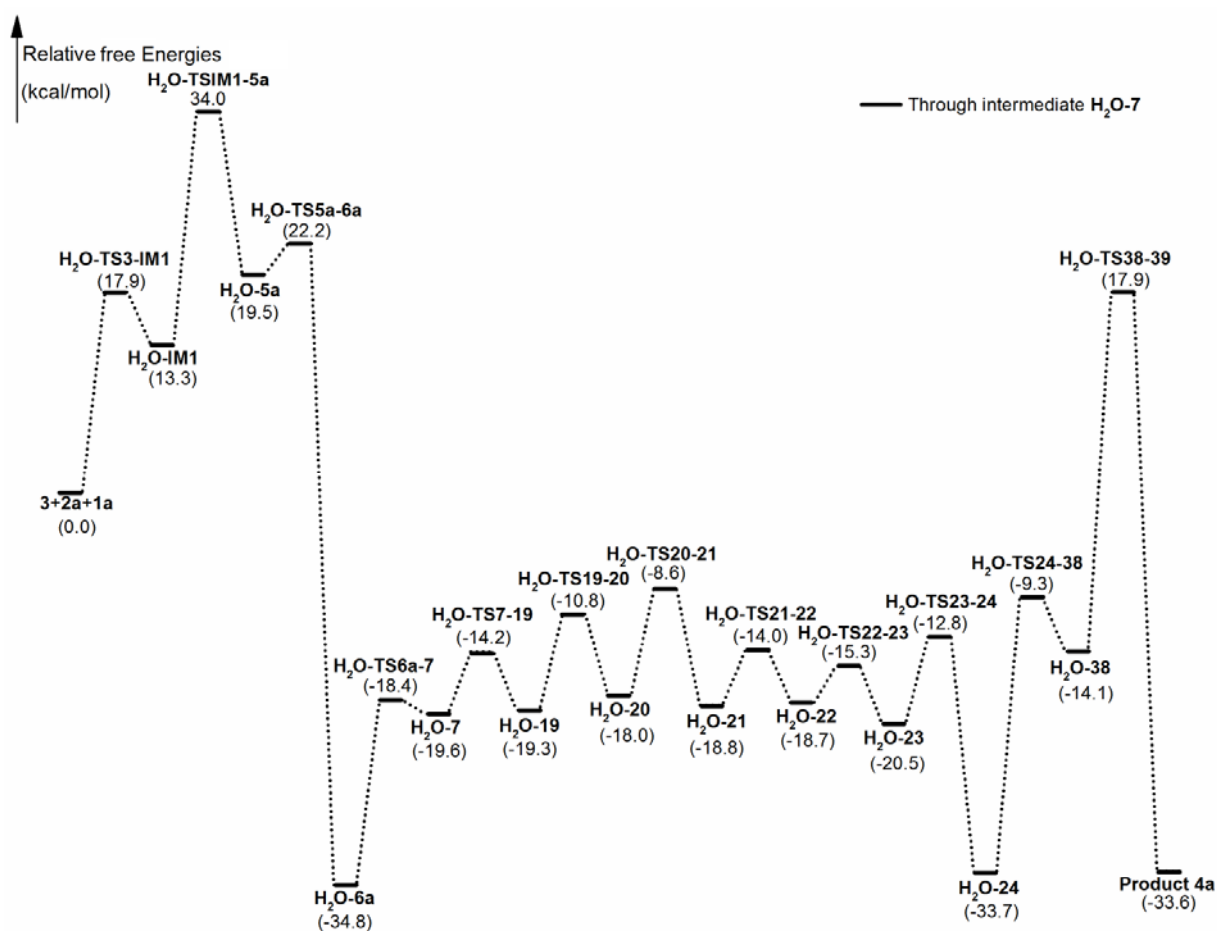

**Figure S9.** Energy profile through intermediate  $\text{H}_2\text{O-7}$  of L-proline-catalyzed trasamidation of  $1a$  with  $2a$  in  $\text{H}_2\text{O}$ . The relative free energies at M06/6-311+G(2d,p)/M06/6-31+G(d,p) level are given in kcal/mol.

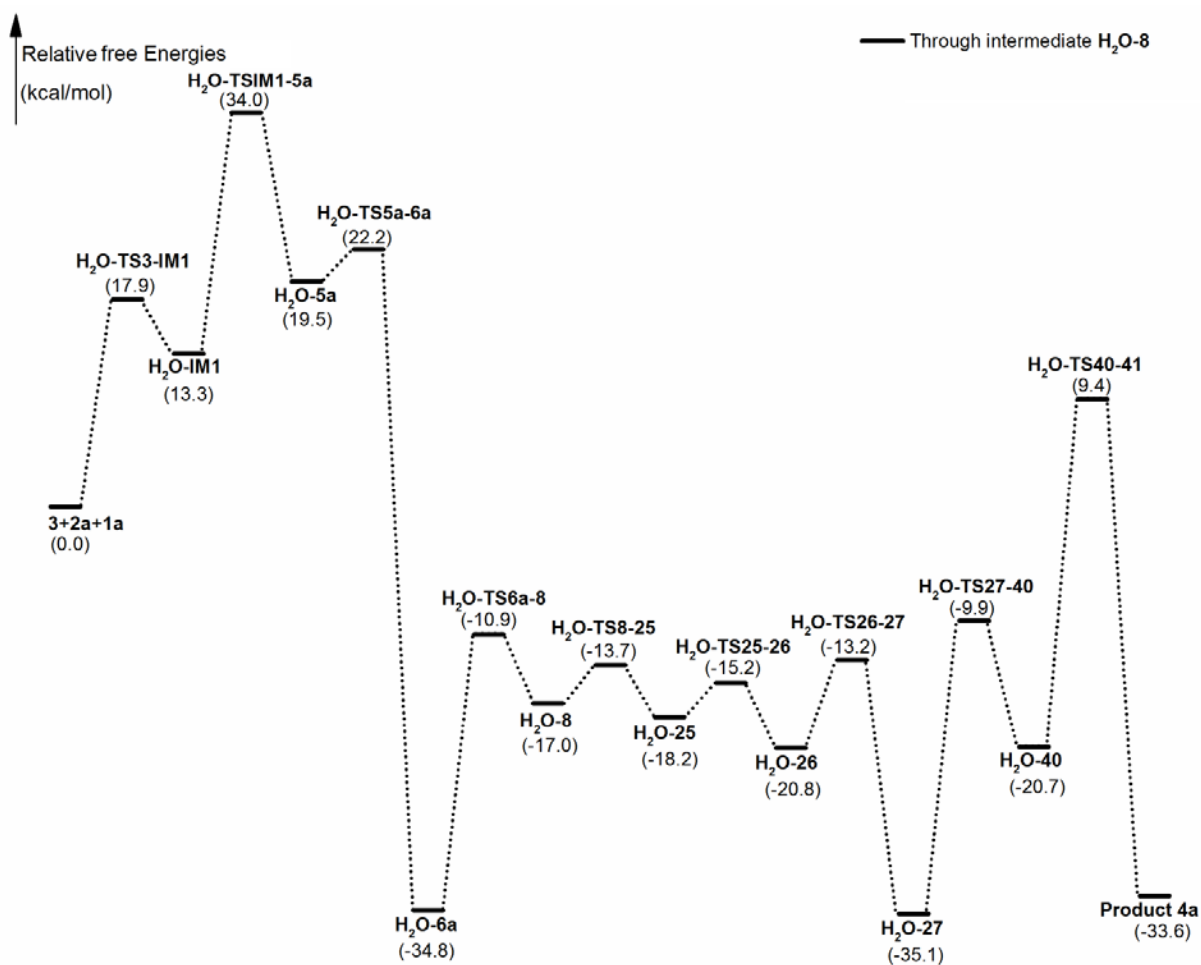

**Figure S10.** Energy profile through intermediate **H<sub>2</sub>O-8** of L-proline-catalyzed trasamidation of **1a** with **2a** in H<sub>2</sub>O. The relative free energies at M06/6-311+G(2d,p)/M06/6-31+G(d,p) level are given in kcal/mol.

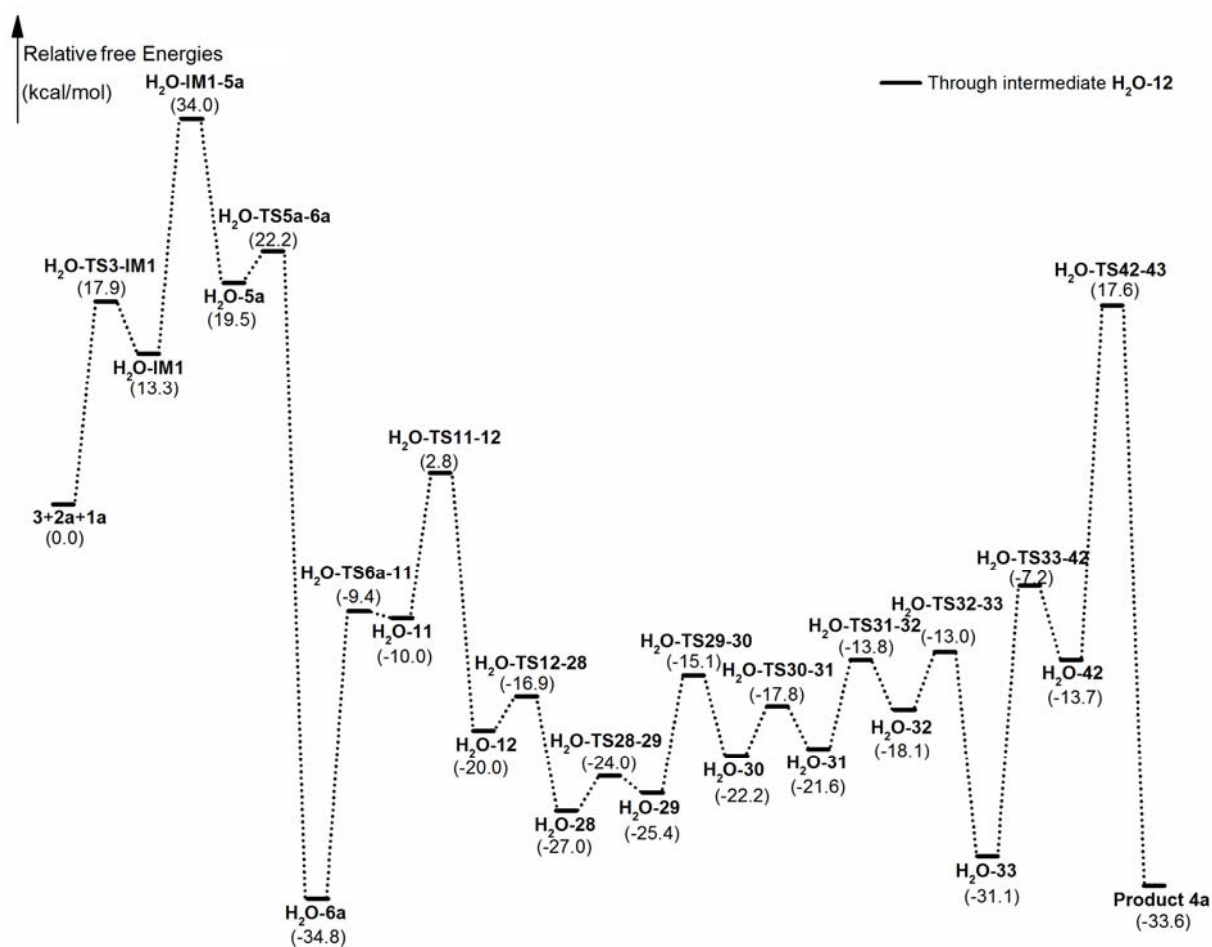

**Figure S11.** Energy profile through intermediate **H<sub>2</sub>O-12** of L-proline-catalyzed transamidation of **1a** with **2a** in H<sub>2</sub>O. The relative free energies at M06/6-311+G(2d,p)//M06/6-31+G(d,p) level are given in kcal/mol.

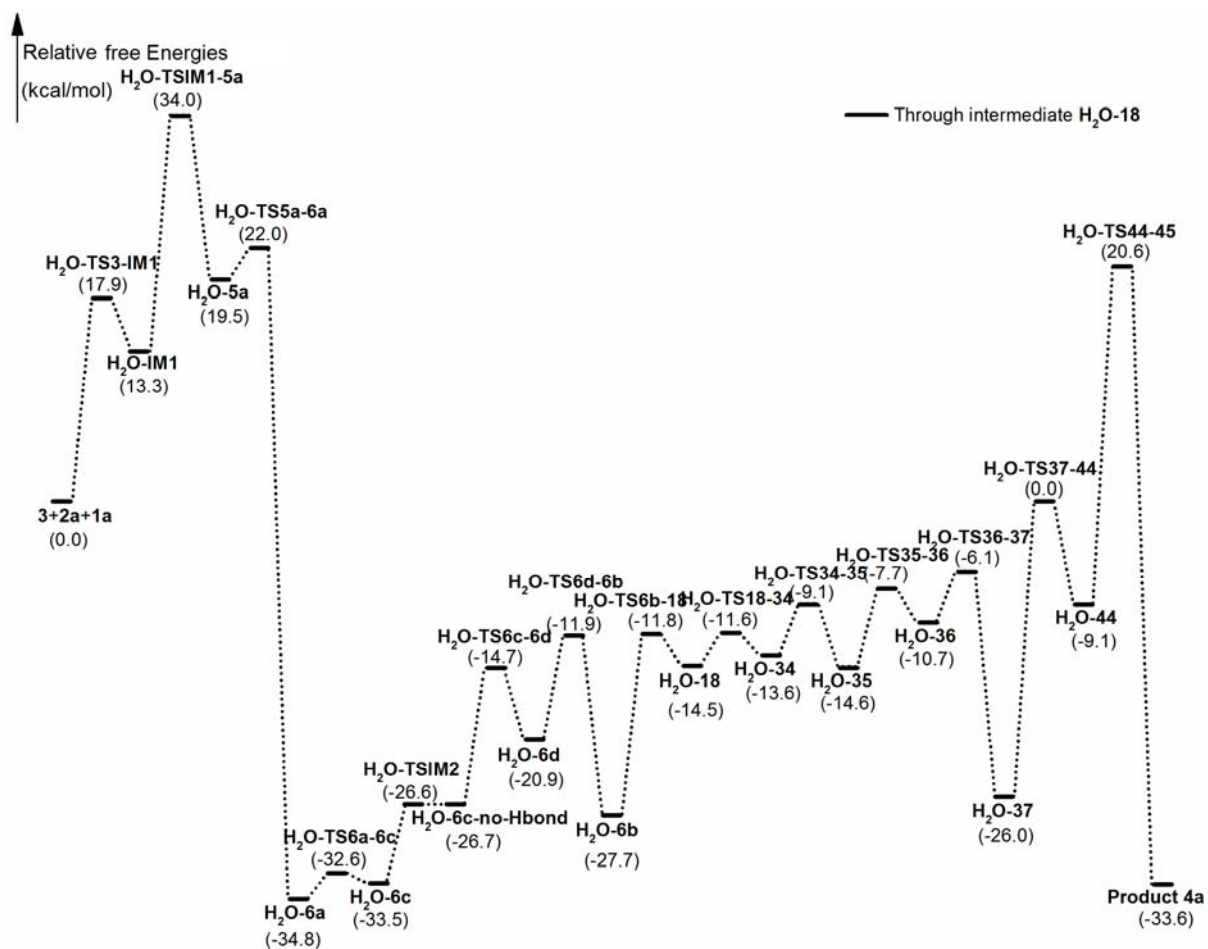

**Figure S12.** Energy profile through intermediate **H<sub>2</sub>O-18** of L-proline-catalyzed trasamidation of **1a** with **2a** in H<sub>2</sub>O. The relative free energies at M06/6-311+G(2d,p)//M06/6-31+G(d,p) level are given in kcal/mol.

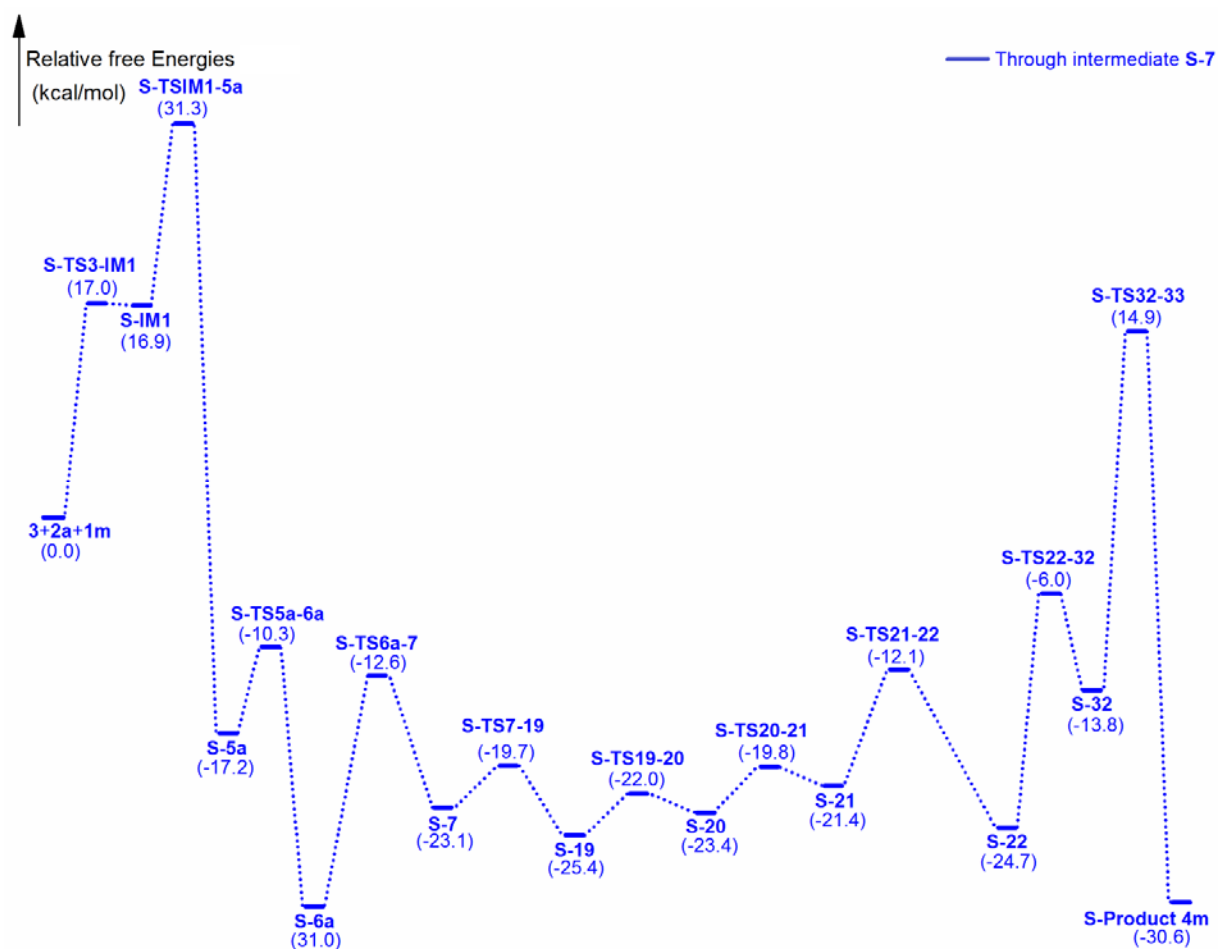

**Figure S13.** Energy profile through intermediate **S-7** of L-proline-catalyzed transamidation of **1m** with **2a** in toluene. The relative free energies at M06/6-311+G(2d,p)/M06/6-31+G(d,p) level are given in kcal/mol.

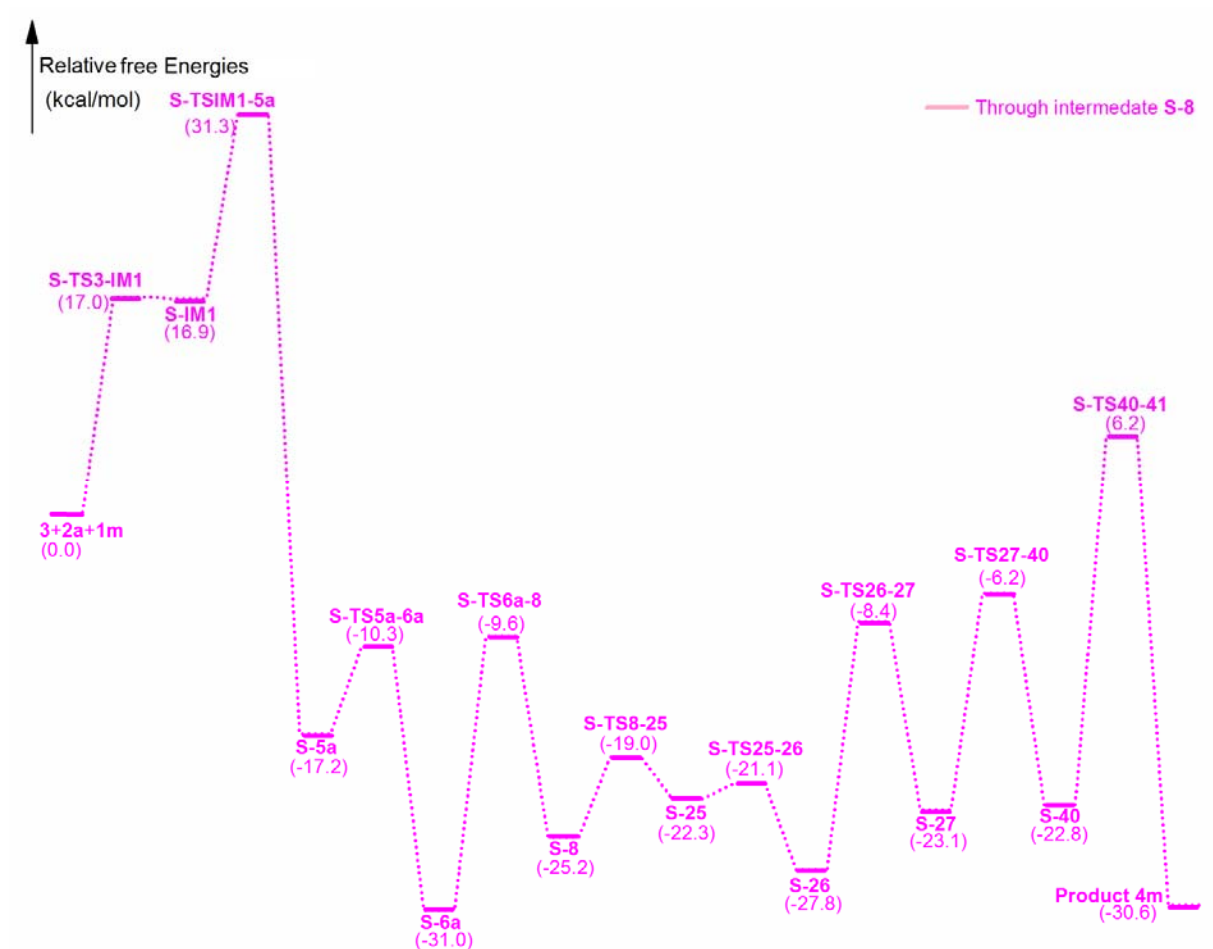

**Figure S14.** Energy profile through intermediate **S-8** of L-proline-catalyzed trasamidation of **1m** with **2a** in toluene. The relative free energies at M06/6-311+G(2d,p)/M06/6-31+G(d,p) level are given in kcal/mol.



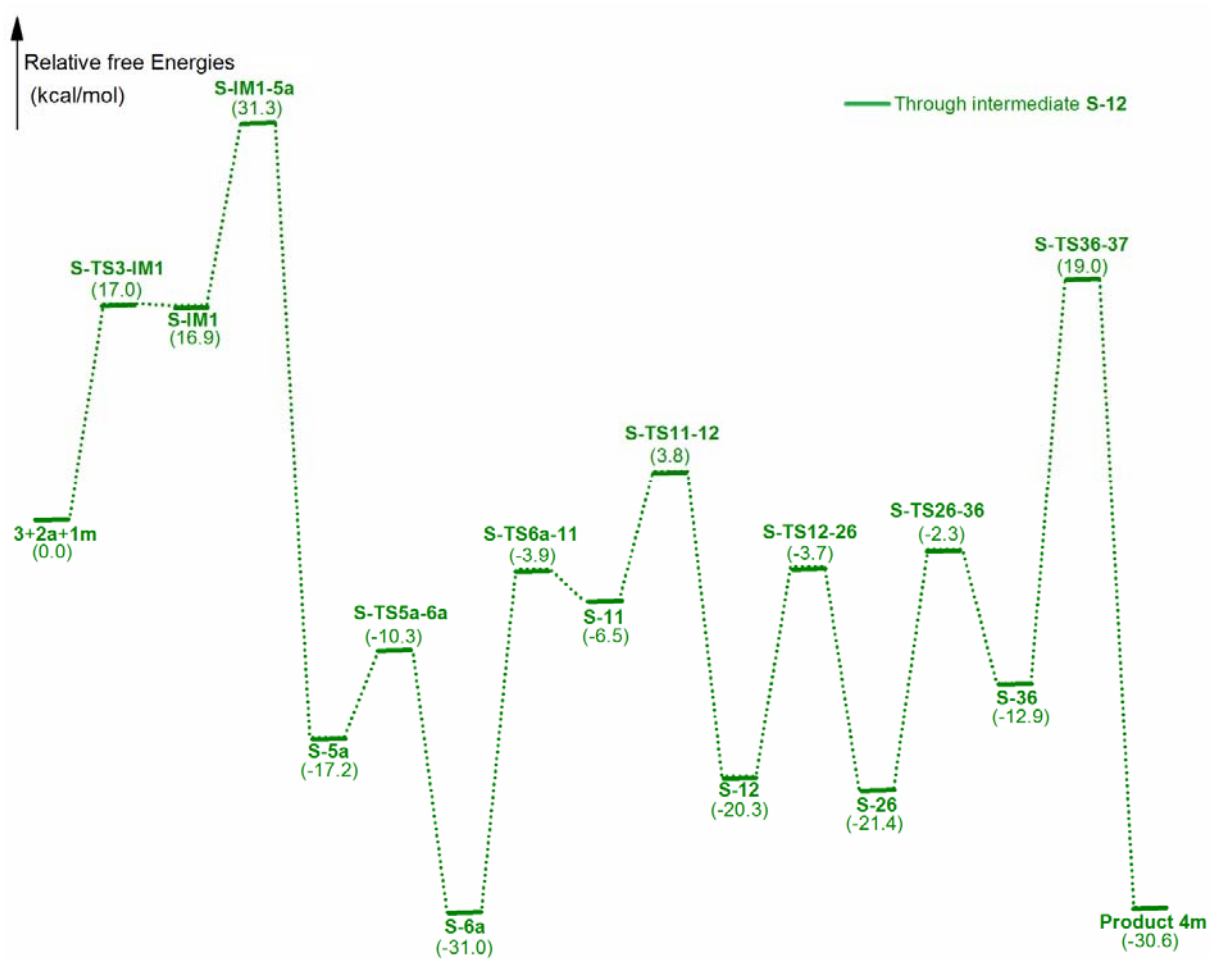

**Figure S15.** Energy profile through intermediate **S-12** of L-proline-catalyzed trasamidation of **1m** with **2a** in toluene. The relative free energies at M06/6-311+G(2d,p)/M06/6-31+G(d,p) level are given in kcal/mol.

### Cartesian Coordinates of all stationary points

#### 5a

|   |             |             |             |
|---|-------------|-------------|-------------|
| C | -0.72898400 | 2.57489100  | -0.30353000 |
| C | -1.76168500 | 1.47355000  | -0.03946000 |
| C | -0.92690300 | 0.23742100  | 0.34337900  |
| C | 0.60498800  | 1.92356300  | 0.02246700  |
| H | -0.75226600 | 2.87956300  | -1.35539900 |
| H | -0.89639100 | 3.47117000  | 0.30164300  |
| H | -2.35803600 | 1.26088000  | -0.93270800 |
| H | -2.46591500 | 1.71444200  | 0.76068700  |
| H | -0.81942900 | 0.22391400  | 1.44619100  |
| H | 0.85449500  | 2.05966500  | 1.09263300  |
| H | 1.42678400  | 2.32938200  | -0.57362500 |
| N | 0.38863900  | 0.49784500  | -0.27502200 |
| C | -1.71629400 | -1.02310500 | 0.01060100  |
| O | -2.87329700 | -1.09674200 | 0.36669500  |
| O | -1.14260300 | -2.03392500 | -0.62898000 |
| H | -0.18069900 | -1.88298700 | -0.80946300 |
| C | 1.50280600  | -0.37981900 | 0.07759000  |
| C | 2.85378600  | 0.27948100  | -0.13563900 |
| H | 3.03794300  | 1.06875800  | 0.59780700  |
| H | 3.62855800  | -0.48637700 | -0.02894100 |
| H | 2.92863200  | 0.70267900  | -1.14308800 |
| N | 1.42786400  | -0.86950400 | 1.42159100  |
| H | 0.65125800  | -1.51038500 | 1.55932400  |
| H | 2.27685800  | -1.37167100 | 1.66365100  |
| O | 1.44282300  | -1.51884300 | -0.82903700 |
| H | 1.57100900  | -1.17721900 | -1.72656100 |

#### 5b

|   |             |             |             |
|---|-------------|-------------|-------------|
| C | 0.94302900  | 2.46562100  | 0.01868900  |
| C | 1.87425800  | 1.30527400  | -0.31037900 |
| C | 0.93392400  | 0.11217100  | -0.63204000 |
| C | -0.25435300 | 1.75925200  | 0.62984100  |
| H | 1.40086500  | 3.19605400  | 0.69286700  |
| H | 0.62673200  | 2.98590100  | -0.89324300 |
| H | 2.48881200  | 1.06278500  | 0.56651800  |
| H | 2.56196700  | 1.50504200  | -1.13575900 |
| H | 0.95011200  | -0.11759400 | -1.70660200 |
| H | -1.15507700 | 2.38367900  | 0.60243000  |
| H | -0.05578300 | 1.49450600  | 1.68803600  |
| N | -0.38311600 | 0.58911400  | -0.22715300 |
| C | 1.54760000  | -1.10712600 | 0.05623100  |
| O | 2.56188800  | -1.59804200 | -0.38975900 |
| O | 1.00999400  | -1.55565700 | 1.18869800  |
| H | 0.08727100  | -1.23235000 | 1.32964600  |
| C | -1.54207400 | -0.24440700 | -0.17218900 |
| O | -1.61613600 | -0.93793500 | 1.13169700  |
| H | -1.97794600 | -0.32375400 | 1.78395700  |
| C | -1.49110200 | -1.36361900 | -1.19261200 |

|   |             |             |             |
|---|-------------|-------------|-------------|
| H | -1.35287800 | -0.94509900 | -2.19297600 |
| H | -0.69351200 | -2.08108300 | -0.97981600 |
| H | -2.43825400 | -1.91013100 | -1.16530200 |
| N | -2.73048300 | 0.53166600  | -0.39476700 |
| H | -3.55773300 | -0.04288900 | -0.26735900 |
| H | -2.80305100 | 1.34955000  | 0.20071300  |

**6a**

|   |             |             |             |
|---|-------------|-------------|-------------|
| C | 1.44946700  | 1.79611200  | 0.75893800  |
| C | 1.90193900  | 1.28432300  | -0.60390200 |
| C | 0.92299200  | 0.15778800  | -0.87643800 |
| C | -0.06668000 | 1.80482500  | 0.63730600  |
| H | 1.76073300  | 1.08678400  | 1.53570400  |
| H | 1.84461100  | 2.78344900  | 1.01330100  |
| H | 2.92723800  | 0.90904200  | -0.60118500 |
| H | 1.80354500  | 2.07034000  | -1.36482600 |
| H | 0.74732400  | -0.01891100 | -1.94718600 |
| H | -0.42721800 | 2.74543400  | 0.19685100  |
| H | -0.58521600 | 1.63343300  | 1.58662300  |
| N | -0.33783200 | 0.69247800  | -0.29480800 |
| C | 1.32069000  | -1.20829000 | -0.22973000 |
| O | 2.44492200  | -1.31206200 | 0.26453900  |
| O | 0.40759300  | -2.09282900 | -0.29914100 |
| H | -0.60294400 | -1.78794100 | 1.23853400  |
| C | -1.55021500 | 0.25726000  | -0.56548800 |
| C | -2.73660400 | 0.96568800  | -0.01717300 |
| H | -2.62923800 | 2.05214800  | -0.06539900 |
| H | -3.64233200 | 0.67226300  | -0.55261700 |
| H | -2.84739200 | 0.67037000  | 1.03376400  |
| N | -1.72006500 | -0.82003700 | -1.32958500 |
| H | -0.95885300 | -1.52311100 | -1.25938100 |
| H | -2.66444000 | -1.15411500 | -1.45766400 |
| O | -1.19087100 | -1.32372900 | 1.86940900  |
| H | -1.06322300 | -1.76355200 | 2.71470700  |

**6b**

|   |             |             |             |
|---|-------------|-------------|-------------|
| C | 0.83227100  | 2.48909900  | -0.28522200 |
| C | 1.79308400  | 1.34054400  | -0.00411000 |
| C | 1.09947000  | 0.10337600  | -0.58686500 |
| C | -0.52324800 | 1.84989200  | -0.03710800 |
| H | 0.99999800  | 3.35849000  | 0.35667700  |
| H | 0.90981700  | 2.81534700  | -1.33055900 |
| H | 1.90554500  | 1.20874700  | 1.08131800  |
| H | 2.79057900  | 1.47577900  | -0.42890300 |
| H | 1.41786100  | -0.08346700 | -1.62087700 |
| H | -1.35513100 | 2.33275800  | -0.56266900 |
| H | -0.75850700 | 1.78643600  | 1.03510000  |
| N | -0.32805200 | 0.49111800  | -0.57164400 |
| C | 1.40612800  | -1.14516200 | 0.28518100  |
| O | 2.48920200  | -1.68845100 | 0.02389400  |
| O | 0.55858300  | -1.43846200 | 1.17080900  |
| H | -0.75287600 | -0.56057500 | 1.91733000  |
| C | -1.30573200 | -0.33803400 | -0.84502600 |

|   |             |             |             |
|---|-------------|-------------|-------------|
| O | -1.53138500 | -0.04565400 | 2.24546900  |
| H | -1.62305900 | -0.26744500 | 3.17585100  |
| C | -1.05011500 | -1.63044900 | -1.52961900 |
| H | -0.26973700 | -1.53994700 | -2.28922000 |
| H | -0.70917300 | -2.35395300 | -0.77867500 |
| H | -1.96458200 | -2.00571200 | -1.99504000 |
| N | -2.56565400 | -0.01153700 | -0.52688000 |
| H | -3.27606800 | -0.71300800 | -0.68170500 |
| H | -2.70107400 | 0.55442200  | 0.30627700  |

**6c**

|   |             |             |             |
|---|-------------|-------------|-------------|
| C | -0.94263800 | 2.12855000  | -0.30925400 |
| C | -1.41506400 | 1.29276800  | 0.87595000  |
| C | -0.67999000 | -0.02541600 | 0.68895900  |
| C | 0.53526800  | 1.77975700  | -0.40133700 |
| H | -1.46380600 | 1.81188600  | -1.22127000 |
| H | -1.10712600 | 3.20190800  | -0.17892000 |
| H | -2.49766500 | 1.15099200  | 0.90344600  |
| H | -1.09487500 | 1.75457600  | 1.81854000  |
| H | -0.42963600 | -0.51736900 | 1.64120900  |
| H | 1.13195800  | 2.40884700  | 0.27884500  |
| H | 0.94064000  | 1.89293200  | -1.41334400 |
| N | 0.57466300  | 0.37751200  | 0.02916200  |
| C | -1.46430100 | -1.04163100 | -0.15519600 |
| O | -2.57604200 | -0.82387800 | -0.58654200 |
| O | -0.84439900 | -2.19357800 | -0.36242300 |
| C | 1.69675100  | -0.38559100 | 0.10102400  |
| C | 2.97408300  | 0.25617300  | -0.34952800 |
| H | 3.14638700  | 1.21062400  | 0.15988400  |
| H | 3.82099900  | -0.40461400 | -0.15187900 |
| H | 2.94296000  | 0.45970800  | -1.42616800 |
| N | 1.59329800  | -1.60699200 | 0.52633200  |
| H | 0.07900100  | -2.17635800 | 0.04343600  |
| H | 2.49431500  | -2.07479000 | 0.54578300  |

**6c-no-Hbond**

|   |             |             |             |
|---|-------------|-------------|-------------|
| C | 0.63687900  | 2.19430400  | 0.30642700  |
| C | 1.24849000  | 1.40303800  | -0.84496800 |
| C | 0.67026800  | -0.00205000 | -0.64600200 |
| C | -0.78388700 | 1.65607500  | 0.35783000  |
| H | 1.16117300  | 1.97476700  | 1.24687500  |
| H | 0.66620600  | 3.27693000  | 0.15409200  |
| H | 2.34169000  | 1.39856100  | -0.85945000 |
| H | 0.89834000  | 1.80298100  | -1.80447100 |
| H | 0.51091000  | -0.53410400 | -1.59185100 |
| H | -1.41539700 | 2.15873600  | -0.39245800 |
| H | -1.25617000 | 1.78089300  | 1.33872700  |
| N | -0.61147900 | 0.23309000  | 0.02634300  |
| C | 1.61803300  | -0.87694300 | 0.16820800  |
| O | 2.70584700  | -1.19853600 | -0.24665800 |
| O | 1.19594400  | -1.24031600 | 1.38328300  |
| C | -1.67219500 | -0.62720400 | -0.21829200 |
| C | -3.01081400 | -0.15924100 | 0.27578000  |

|   |             |             |             |
|---|-------------|-------------|-------------|
| H | -3.33012400 | 0.75142600  | -0.24437700 |
| H | -3.76561100 | -0.93094000 | 0.10822100  |
| H | -2.98274800 | 0.06938500  | 1.34741900  |
| N | -1.43013500 | -1.74589700 | -0.79885500 |
| H | 0.29441900  | -0.88584100 | 1.49829700  |
| H | -2.28636100 | -2.29020500 | -0.88033400 |

**6d**

|   |             |             |             |
|---|-------------|-------------|-------------|
| C | 0.78286700  | 2.16667600  | 0.19597800  |
| C | 1.23551900  | 1.29798000  | -0.97224900 |
| C | 0.59607500  | -0.06009000 | -0.65232200 |
| C | -0.65704300 | 1.72606300  | 0.40234000  |
| H | 1.38645200  | 1.95235000  | 1.08891600  |
| H | 0.86472600  | 3.23783100  | -0.00830000 |
| H | 2.31998700  | 1.22065100  | -1.09053400 |
| H | 0.81498500  | 1.67607200  | -1.91206500 |
| H | 0.39503900  | -0.62663000 | -1.56891800 |
| H | -1.35001500 | 2.23973900  | -0.28012700 |
| H | -1.03374400 | 1.87791000  | 1.41871600  |
| N | -0.62614000 | 0.28946000  | 0.07495600  |
| C | 1.55337800  | -0.91237600 | 0.17999100  |
| O | 2.56988800  | -1.37288700 | -0.28121500 |
| O | 1.20848800  | -1.09912600 | 1.45778200  |
| C | -1.82842300 | -0.38979000 | -0.06338800 |
| C | -1.74440700 | -1.78225900 | -0.62521800 |
| H | -0.97061500 | -2.38534500 | -0.13609200 |
| H | -2.70196100 | -2.29271000 | -0.49808200 |
| H | -1.51557900 | -1.76095700 | -1.69731300 |
| N | -2.90436900 | 0.20156800  | 0.30956400  |
| H | 0.34882600  | -0.65318000 | 1.59587400  |
| H | -3.69934700 | -0.42404800 | 0.19296600  |

**7**

|   |             |             |             |
|---|-------------|-------------|-------------|
| N | 0.32049700  | -0.61502500 | -0.21517500 |
| H | -0.32934600 | 0.94438500  | -0.19603900 |
| H | 0.54907900  | -0.89179000 | 0.74056800  |
| C | 2.71115800  | -0.22258200 | -0.38882400 |
| C | 2.86018600  | 1.16679200  | -0.34338300 |
| C | 3.67021900  | -1.02812300 | 0.22596100  |
| C | 3.94880600  | 1.73860400  | 0.30580800  |
| H | 2.11340700  | 1.80103500  | -0.82091700 |
| C | 4.76350100  | -0.45801500 | 0.87602300  |
| H | 3.56063800  | -2.11187000 | 0.19054200  |
| C | 4.90341100  | 0.92608100  | 0.91722500  |
| H | 4.05541700  | 2.82035200  | 0.33316700  |
| H | 5.50650500  | -1.09667800 | 1.34803700  |
| H | 5.75612100  | 1.37345000  | 1.42248500  |
| C | 1.50836800  | -0.83069900 | -1.05226900 |
| H | 1.69590700  | -1.90079600 | -1.24648600 |
| H | 1.33316700  | -0.34852300 | -2.02368400 |
| C | -3.38280000 | -0.43493400 | 2.03088900  |
| C | -3.72290500 | 0.67180000  | 1.03179500  |
| C | -2.81013900 | 0.40896300  | -0.19876200 |

|   |             |             |             |
|---|-------------|-------------|-------------|
| C | -1.95876400 | -0.80300400 | 1.64929700  |
| H | -3.47811600 | -0.10664200 | 3.07094900  |
| H | -4.03055200 | -1.30717400 | 1.88404600  |
| H | -3.49726700 | 1.65592500  | 1.45909900  |
| H | -4.77859700 | 0.68726100  | 0.74853600  |
| H | -3.40635600 | 0.16681600  | -1.08816700 |
| H | -1.66623300 | -1.79988200 | 2.00000000  |
| H | -1.24655900 | -0.06901800 | 2.08028600  |
| N | -2.02273500 | -0.75019400 | 0.19712100  |
| C | -2.10356300 | 1.72649000  | -0.54168700 |
| O | -2.76066000 | 2.67225200  | -0.92705100 |
| O | -0.78713900 | 1.82328700  | -0.39277700 |
| C | -0.95852200 | -1.29955500 | -0.62116400 |
| C | -0.86515000 | -2.80758800 | -0.41478500 |
| H | -1.81184600 | -3.27349600 | -0.70338500 |
| H | -0.06260700 | -3.23766800 | -1.02510200 |
| H | -0.65468100 | -3.05615400 | 0.62988300  |
| N | -1.26605100 | -1.05819400 | -2.00845900 |
| H | -1.09095800 | -0.10032300 | -2.29937100 |
| H | -0.73954900 | -1.67501600 | -2.61698100 |

**8**

|   |             |             |             |
|---|-------------|-------------|-------------|
| C | 3.64041100  | 0.00701900  | -1.69622300 |
| C | 2.86154000  | -1.28936400 | -1.44679500 |
| C | 1.68371500  | -0.90197000 | -0.53708100 |
| C | 3.21433900  | 0.89444300  | -0.54195700 |
| H | 4.72260500  | -0.15325200 | -1.73093100 |
| H | 3.33574000  | 0.46833000  | -2.64346500 |
| H | 3.48162700  | -2.02482700 | -0.92566100 |
| H | 2.50907100  | -1.74876700 | -2.37527200 |
| H | 0.71851800  | -1.14674400 | -1.00751600 |
| H | 3.34150900  | 1.96109000  | -0.75701300 |
| H | 3.78198100  | 0.66614400  | 0.37835200  |
| N | 1.79826000  | 0.56195400  | -0.40654300 |
| C | 1.72185600  | -1.67513600 | 0.79449600  |
| O | 2.67013600  | -2.31174400 | 1.19454100  |
| O | 0.59431400  | -1.60727300 | 1.51203200  |
| C | 1.02002100  | 1.32562400  | 0.55902800  |
| C | 1.02958100  | 2.80408200  | 0.16698300  |
| H | 0.24044000  | 3.33824100  | 0.71177500  |
| H | 1.98617400  | 3.26805000  | 0.42461300  |
| H | 0.86083200  | 2.92828000  | -0.90642400 |
| N | 1.55808300  | 1.24360700  | 1.90754900  |
| H | 1.36159000  | 0.36090200  | 2.37105100  |
| H | 1.23915000  | 2.00563500  | 2.49696000  |
| N | -0.35491600 | 0.75750200  | 0.53442500  |
| H | -0.00119600 | -0.90645500 | 1.12129700  |
| H | -0.86729400 | 1.17871000  | 1.30976800  |
| C | -2.49641200 | 0.31658600  | -0.51690100 |
| C | -2.66219400 | -1.06985000 | -0.58353600 |
| C | -3.60333000 | 1.11382800  | -0.22310500 |
| C | -3.90733300 | -1.64626200 | -0.35704500 |
| H | -1.80628600 | -1.70247300 | -0.81951300 |

|   |             |             |             |
|---|-------------|-------------|-------------|
| C | -4.85328600 | 0.54107000  | 0.00368800  |
| H | -3.48351300 | 2.19623900  | -0.17622700 |
| C | -5.00630300 | -0.84083300 | -0.06091900 |
| H | -4.02206000 | -2.72614800 | -0.41281900 |
| H | -5.70756800 | 1.17484900  | 0.22992100  |
| H | -5.98027900 | -1.29145900 | 0.11461900  |
| C | -1.14032400 | 0.93750900  | -0.69756000 |
| H | -1.25641300 | 2.00127500  | -0.96019500 |
| H | -0.59392600 | 0.46259600  | -1.52235600 |

**9**

|   |             |             |             |
|---|-------------|-------------|-------------|
| C | -2.47137300 | -2.01890300 | -1.13886900 |
| C | -3.56935100 | -0.97615000 | -0.97389300 |
| C | -2.89546600 | 0.06993500  | -0.09516700 |
| C | -1.24252800 | -1.14597100 | -1.33588800 |
| H | -2.37709500 | -2.61152700 | -0.21921700 |
| H | -2.63939900 | -2.70680600 | -1.97295400 |
| H | -4.48999100 | -1.35987800 | -0.52755900 |
| H | -3.80802900 | -0.52775300 | -1.94857100 |
| H | -3.30007900 | 1.07538900  | -0.30257300 |
| H | -1.18456000 | -0.82235300 | -2.39226700 |
| H | -0.30303700 | -1.66719700 | -1.09896800 |
| N | -1.46479500 | -0.02384600 | -0.42450400 |
| C | -3.11057200 | -0.19525400 | 1.40314700  |
| O | -3.93121500 | -0.98101900 | 1.82677100  |
| O | -2.34166800 | 0.50897200  | 2.22667700  |
| C | -0.70049900 | 1.20355600  | -0.66656900 |
| C | -1.00749600 | 1.83841900  | -2.02211700 |
| H | -0.47548900 | 2.79053200  | -2.12156400 |
| H | -0.70561400 | 1.19233200  | -2.85415500 |
| H | -2.08503300 | 2.02491400  | -2.11948300 |
| N | -1.02838600 | 2.13722300  | 0.43043700  |
| H | -1.74035200 | 1.11484600  | 1.70891000  |
| H | -1.77177400 | 2.77321100  | 0.14894200  |
| N | 0.72588100  | 0.95123400  | -0.59665200 |
| H | 1.04953800  | 0.50527100  | -1.45176800 |
| H | -0.20948300 | 2.71718300  | 0.60022600  |
| C | 2.66508500  | -0.10112400 | 0.41156400  |
| C | 3.10161900  | -1.41579900 | 0.24518000  |
| C | 3.60957600  | 0.92989500  | 0.40028900  |
| C | 4.45677400  | -1.69975600 | 0.07870600  |
| H | 2.37103700  | -2.22483900 | 0.25351700  |
| C | 4.96127800  | 0.65190400  | 0.23408000  |
| H | 3.27142500  | 1.95806900  | 0.52322200  |
| C | 5.38872800  | -0.66640300 | 0.07338500  |
| H | 4.78294100  | -2.72993900 | -0.04508600 |
| H | 5.68615400  | 1.46285800  | 0.23278600  |
| H | 6.44634300  | -0.88552100 | -0.05394900 |
| C | 1.20522200  | 0.21226300  | 0.57463400  |
| H | 1.05480200  | 0.84014700  | 1.46454200  |
| H | 0.63589300  | -0.71451900 | 0.75251400  |

**10**

|   |             |             |             |
|---|-------------|-------------|-------------|
| C | -2.42416800 | -0.71192100 | 2.20930100  |
| C | -1.76227800 | -1.66336700 | 1.21855600  |
| C | -1.81306300 | -0.85279900 | -0.07125100 |
| C | -1.84302400 | 0.64182400  | 1.82018400  |
| H | -3.51161200 | -0.71881700 | 2.05337100  |
| H | -2.23305200 | -0.96164500 | 3.25742000  |
| H | -2.27017100 | -2.62571000 | 1.12134500  |
| H | -0.71648500 | -1.84844000 | 1.49923700  |
| H | -0.99640500 | -1.12276400 | -0.76093300 |
| H | -0.88833100 | 0.80604700  | 2.34982700  |
| H | -2.51057400 | 1.47251200  | 2.08616900  |
| N | -1.66974100 | 0.53777400  | 0.36775100  |
| C | -3.13182800 | -1.09698600 | -0.82569900 |
| O | -3.76509300 | -2.12708100 | -0.71774500 |
| O | -3.53727100 | -0.12622300 | -1.63401000 |
| C | -0.82644200 | 1.44111100  | -0.38895700 |
| C | -0.84672600 | 2.82241900  | 0.25813200  |
| H | -0.23404400 | 3.50862300  | -0.33862500 |
| H | -1.87058900 | 3.21091000  | 0.30594900  |
| H | -0.44040500 | 2.80875100  | 1.27348900  |
| N | -1.37805000 | 1.55842600  | -1.75402000 |
| H | -2.86947600 | 0.61636000  | -1.65992100 |
| H | -1.45164100 | 2.52404200  | -2.05876000 |
| N | 0.52999500  | 0.89483100  | -0.56510900 |
| H | -0.79302000 | 1.05480000  | -2.41721300 |
| H | 1.06569900  | 1.51164200  | -1.17486200 |
| C | 2.64484900  | 0.03651700  | 0.26385000  |
| C | 2.72182600  | -1.21496500 | -0.35566300 |
| C | 3.82284800  | 0.73910700  | 0.51352600  |
| C | 3.95263700  | -1.75239500 | -0.71398000 |
| H | 1.80185700  | -1.76483600 | -0.55534900 |
| C | 5.05996100  | 0.20449000  | 0.15430800  |
| H | 3.77087200  | 1.71389300  | 0.99815600  |
| C | 5.12651600  | -1.04195300 | -0.46019200 |
| H | 4.00023900  | -2.72916900 | -1.19009400 |
| H | 5.97085200  | 0.76324000  | 0.35696900  |
| H | 6.08949600  | -1.46259200 | -0.74012000 |
| C | 1.30636300  | 0.60957300  | 0.63698100  |
| H | 1.45618600  | 1.49520600  | 1.28216000  |
| H | 0.74926500  | -0.12677300 | 1.23089700  |

## 11

|   |             |             |             |
|---|-------------|-------------|-------------|
| C | -1.20228400 | 1.27555500  | -0.68393400 |
| N | -1.41449100 | 2.16220700  | 0.42151700  |
| H | -2.22708800 | 2.74369500  | 0.23620500  |
| N | 0.39559600  | 0.91696400  | -0.61232400 |
| H | 0.67069700  | 0.52587500  | -1.51712400 |
| H | 0.90485800  | 1.81131200  | -0.48974500 |
| C | 2.25357300  | -0.42824700 | 0.23085200  |
| C | 2.55081700  | -1.60336900 | -0.46311100 |
| C | 3.29782200  | 0.39282200  | 0.66352300  |
| C | 3.87303300  | -1.95169400 | -0.72559600 |
| H | 1.73771200  | -2.25679700 | -0.78101800 |



|   |             |             |             |
|---|-------------|-------------|-------------|
| C | 4.61963800  | 0.04603500  | 0.40271200  |
| H | 3.06735200  | 1.30482000  | 1.21384300  |
| C | 4.90820600  | -1.12588600 | -0.29437900 |
| H | 4.09555000  | -2.87295400 | -1.25839500 |
| H | 5.42671300  | 0.68704900  | 0.74891300  |
| H | 5.94148100  | -1.39914800 | -0.49405000 |
| C | 0.82609200  | -0.03500800 | 0.45923900  |
| H | 0.66008800  | 0.46026400  | 1.42185000  |
| H | 0.15716100  | -0.90192800 | 0.42015000  |
| O | 1.05639900  | 3.50685200  | 0.30434700  |
| H | 1.54456000  | 3.85382900  | 1.05718800  |
| H | 0.14366500  | 3.30859500  | 0.60904200  |
| C | -1.31389300 | 2.02809100  | -2.00061100 |
| H | -0.68501400 | 2.92483700  | -1.99381200 |
| H | -1.03461300 | 1.40769600  | -2.85804500 |
| H | -2.35762200 | 2.33151400  | -2.13839700 |
| N | -1.92607400 | 0.07993900  | -0.64330300 |
| C | -2.55424700 | -2.11054400 | -1.16506800 |
| C | -3.55767800 | -1.52747000 | -0.17697700 |
| C | -2.80926400 | -0.36646400 | 0.46602600  |
| C | -1.90902400 | -0.86568600 | -1.75503000 |
| H | -1.80903500 | -2.69443400 | -0.61140500 |
| H | -3.00783700 | -2.74856600 | -1.93017200 |
| H | -3.88445200 | -2.25159600 | 0.57325200  |
| H | -4.44005900 | -1.14929400 | -0.71249200 |
| H | -3.49386200 | 0.45045700  | 0.73730500  |
| H | -2.48595100 | -0.48861400 | -2.61763000 |
| H | -0.88227700 | -1.06192700 | -2.10935700 |
| C | -1.97484300 | -0.74666900 | 1.72221900  |
| O | -1.69287200 | -1.94740100 | 1.89092800  |
| O | -1.60185300 | 0.23918800  | 2.42416400  |
| H | -1.56833700 | 1.62364900  | 1.29795900  |

## 12

|   |             |             |             |
|---|-------------|-------------|-------------|
| C | -0.77253300 | 1.01311400  | -0.72805700 |
| N | -1.05271000 | 2.00750700  | 0.32179500  |
| H | -1.81212500 | 2.61790000  | 0.02647300  |
| N | 0.65188800  | 0.68519700  | -0.64481600 |
| H | 0.91813000  | 0.12690000  | -1.45438400 |
| H | 1.58805500  | 2.38138800  | -0.59655200 |
| C | 2.50468800  | -0.44339900 | 0.44832400  |
| C | 2.79845500  | -1.68400000 | -0.12304500 |
| C | 3.55877500  | 0.37986200  | 0.85062700  |
| C | 4.11799900  | -2.09336600 | -0.29520800 |
| H | 1.97990200  | -2.33981800 | -0.42249200 |
| C | 4.87980000  | -0.02642900 | 0.68380900  |
| H | 3.33511000  | 1.34219200  | 1.31141000  |
| C | 5.16185300  | -1.26375600 | 0.10826500  |
| H | 4.33149900  | -3.06470000 | -0.73538800 |
| H | 5.69143800  | 0.62000000  | 1.00982600  |
| H | 6.19322300  | -1.58435700 | -0.01787500 |
| C | 1.07899500  | 0.00292200  | 0.58947000  |
| H | 0.98850300  | 0.71292400  | 1.42198900  |

|   |             |             |             |
|---|-------------|-------------|-------------|
| H | 0.42318100  | -0.85028400 | 0.82398300  |
| O | 1.63783600  | 3.31831200  | -0.31098700 |
| H | 2.56877100  | 3.55362000  | -0.26251700 |
| H | -0.24036300 | 2.61761800  | 0.43049400  |
| C | -1.03994400 | 1.59638400  | -2.11507500 |
| H | -0.48640900 | 2.53248500  | -2.24483800 |
| H | -0.74146700 | 0.91070500  | -2.91598300 |
| H | -2.11166600 | 1.80288700  | -2.23525700 |
| N | -1.58607600 | -0.16722900 | -0.43315700 |
| C | -2.70678500 | -2.13926800 | -1.03438500 |
| C | -3.75205100 | -1.04883400 | -0.83966100 |
| C | -2.99313200 | -0.00412000 | -0.03160100 |
| C | -1.45668800 | -1.32282900 | -1.31975800 |
| H | -2.58603100 | -2.71274800 | -0.10596200 |
| H | -2.94598200 | -2.83923600 | -1.84050200 |
| H | -4.65948600 | -1.38419400 | -0.33195400 |
| H | -4.02878200 | -0.61837400 | -1.81226000 |
| H | -3.37231600 | 1.00785200  | -0.25236300 |
| H | -1.43879600 | -1.03389600 | -2.38748200 |
| H | -0.53033200 | -1.87831000 | -1.11064300 |
| C | -3.13351100 | -0.21364800 | 1.48495400  |
| O | -3.94500900 | -0.96762900 | 1.97865000  |
| O | -2.30621200 | 0.50012600  | 2.23939500  |
| H | -1.72420700 | 1.07884600  | 1.66710800  |

### 13

|   |             |             |             |
|---|-------------|-------------|-------------|
| C | 2.44305400  | -0.05960500 | -2.44797600 |
| C | 1.75493600  | -1.22357600 | -1.74359600 |
| C | 1.81298500  | -0.78126200 | -0.28601300 |
| C | 1.89458300  | 1.16138800  | -1.71640900 |
| H | 3.52942600  | -0.13483100 | -2.30434300 |
| H | 2.25082200  | -0.01914100 | -3.52441400 |
| H | 2.24227500  | -2.18807700 | -1.90252300 |
| H | 0.70741200  | -1.30588100 | -2.06518700 |
| H | 1.01284500  | -1.23723900 | 0.31839400  |
| H | 0.96718500  | 1.50755300  | -2.20487100 |
| H | 2.60246700  | 2.00148700  | -1.73140000 |
| N | 1.66232600  | 0.67363000  | -0.35433300 |
| C | 3.14266900  | -1.21056700 | 0.36175800  |
| O | 3.76135200  | -2.18623700 | -0.01049000 |
| O | 3.57794700  | -0.46595600 | 1.36913500  |
| C | 0.86977500  | 1.38195600  | 0.62142500  |
| C | 0.94804600  | 2.88133100  | 0.36030500  |
| H | 0.36065800  | 3.41396500  | 1.11766500  |
| H | 1.98735400  | 3.22412900  | 0.41497500  |
| H | 0.55003600  | 3.14859100  | -0.62274600 |
| N | 1.41634700  | 1.11799200  | 1.96317200  |
| H | 2.91661900  | 0.24588500  | 1.59914200  |
| H | 1.44256000  | 1.95356600  | 2.53820500  |
| N | -0.53497400 | 0.88606400  | 0.64285600  |
| H | -0.68980000 | -0.76663400 | 1.70710400  |
| H | -1.04887700 | 1.42586800  | 1.34199200  |
| C | -2.60735000 | 0.25217500  | -0.45316100 |

|   |             |             |             |
|---|-------------|-------------|-------------|
| C | -2.67644700 | -1.14299100 | -0.38365200 |
| C | -3.78231900 | 0.99395300  | -0.33570700 |
| C | -3.89646100 | -1.78327000 | -0.19789000 |
| H | -1.76073300 | -1.72730300 | -0.48607700 |
| C | -5.00824200 | 0.35598900  | -0.15007800 |
| H | -3.73618600 | 2.08116600  | -0.39721300 |
| C | -5.06644600 | -1.03268600 | -0.07975300 |
| H | -3.93867300 | -2.86904700 | -0.15404900 |
| H | -5.91825900 | 0.94525300  | -0.06451400 |
| H | -6.02234800 | -1.53168500 | 0.06078000  |
| C | -1.27479100 | 0.92509800  | -0.62110600 |
| H | -1.41782100 | 1.95131500  | -1.00443500 |
| H | -0.68137100 | 0.38020200  | -1.36468100 |
| O | -0.36911400 | -1.36153700 | 2.41511900  |
| H | -1.13488600 | -1.83822200 | 2.74937000  |
| H | 0.88796900  | 0.39752900  | 2.45797100  |

14

|   |             |             |             |
|---|-------------|-------------|-------------|
| C | -3.71657800 | -0.70862000 | 1.36979400  |
| C | -3.94317500 | -0.44111000 | -0.11254300 |
| C | -2.59446200 | 0.14725600  | -0.54005700 |
| C | -2.29884100 | -1.25696500 | 1.37580400  |
| H | -3.76880900 | 0.22880000  | 1.94029300  |
| H | -4.43845700 | -1.40622900 | 1.80469900  |
| H | -4.77913400 | 0.22794800  | -0.33642500 |
| H | -4.10926700 | -1.38711800 | -0.64558700 |
| H | -2.39790500 | -0.04800700 | -1.60228300 |
| H | -2.32358200 | -2.32800200 | 1.10523600  |
| H | -1.79766500 | -1.16682400 | 2.34558500  |
| N | -1.59296000 | -0.45902600 | 0.35240200  |
| C | -2.60836300 | 1.66955000  | -0.38991900 |
| O | -3.29427300 | 2.38862000  | -1.08104100 |
| O | -1.82247000 | 2.13222800  | 0.57861000  |
| C | -0.42501200 | -1.11462400 | -0.31034200 |
| C | -0.87425000 | -2.20534200 | -1.28786200 |
| H | 0.00767700  | -2.73389500 | -1.66380700 |
| H | -1.52854900 | -2.93287400 | -0.79276800 |
| H | -1.41363500 | -1.80214000 | -2.15365400 |
| N | 0.41304100  | -1.63415500 | 0.76093200  |
| H | -1.37549600 | 1.32126100  | 0.93298200  |
| H | -0.00355600 | -2.45900000 | 1.18407300  |
| N | 0.37883900  | -0.16881500 | -1.04920000 |
| H | 1.30184100  | -1.92298500 | 0.35806100  |
| H | -0.09263300 | 0.17601400  | -1.87553100 |
| C | 2.56636000  | 0.54037300  | -0.10139200 |
| C | 3.31338200  | -0.13608000 | -1.06776100 |
| C | 3.20249300  | 0.95708700  | 1.06879800  |
| C | 4.66957300  | -0.38462500 | -0.86984000 |
| H | 2.81632800  | -0.47667600 | -1.97466000 |
| C | 4.55880800  | 0.71327300  | 1.26984900  |
| H | 2.62317500  | 1.47128000  | 1.83556400  |
| C | 5.29754300  | 0.04016800  | 0.29939900  |
| H | 5.23859100  | -0.91265100 | -1.63230600 |

|   |            |             |             |
|---|------------|-------------|-------------|
| H | 5.03724300 | 1.04108800  | 2.19021700  |
| H | 6.35590700 | -0.15626100 | 0.45513400  |
| C | 1.10525500 | 0.85989900  | -0.31803500 |
| H | 1.02643000 | 1.79966800  | -0.88239600 |
| H | 0.64660000 | 1.05235900  | 0.66271500  |

**15**

|   |             |             |             |
|---|-------------|-------------|-------------|
| C | 2.42246300  | 2.15308300  | 1.04509700  |
| C | 2.11174000  | 2.05354300  | -0.44278800 |
| C | 2.15993500  | 0.54034800  | -0.68537900 |
| C | 1.63243800  | 0.98610600  | 1.61243000  |
| H | 3.49819400  | 2.01405900  | 1.22185200  |
| H | 2.13130500  | 3.11090000  | 1.48624900  |
| H | 2.80036600  | 2.59890100  | -1.09467000 |
| H | 1.09473900  | 2.41866100  | -0.63857900 |
| H | 1.49947700  | 0.25441600  | -1.51529300 |
| H | 0.56976700  | 1.26045100  | 1.71659100  |
| H | 2.00178900  | 0.64001600  | 2.58370500  |
| N | 1.79300000  | -0.07793100 | 0.59909100  |
| C | 3.56652200  | 0.10485000  | -1.10528800 |
| O | 4.06406100  | 0.43320400  | -2.15873000 |
| O | 4.19899800  | -0.64591400 | -0.20793700 |
| C | 0.74669900  | -1.11477400 | 0.59625100  |
| C | 1.16256200  | -2.25928200 | -0.32280800 |
| H | 2.11128000  | -2.69369800 | 0.00934900  |
| H | 0.40475200  | -3.05061800 | -0.30820100 |
| H | 1.26919100  | -1.93019800 | -1.36183200 |
| N | 0.65674200  | -1.63706700 | 1.94498400  |
| H | 3.53975800  | -0.75939300 | 0.52469800  |
| H | 0.26214200  | -2.57126900 | 1.95783500  |
| N | -0.52303500 | -0.47179700 | 0.20447400  |
| H | 0.07452300  | -1.03780200 | 2.52464800  |
| H | -0.40126100 | 0.06450400  | -0.65279800 |
| C | -2.93604100 | -0.48456600 | -0.11548900 |
| C | -3.29676300 | 0.45434200  | 0.85634300  |
| C | -3.73796800 | -0.62357300 | -1.24751400 |
| C | -4.43881500 | 1.23089600  | 0.70066900  |
| H | -2.66353800 | 0.57244200  | 1.73513200  |
| C | -4.88382900 | 0.15511800  | -1.40907800 |
| H | -3.46199300 | -1.34943500 | -2.01206400 |
| C | -5.23668200 | 1.08331600  | -0.43485300 |
| H | -4.71063900 | 1.95485200  | 1.46569100  |
| H | -5.49773500 | 0.03659100  | -2.29896800 |
| H | -6.12926800 | 1.69223800  | -0.55750200 |
| C | -1.69925000 | -1.32222700 | 0.06675200  |
| H | -1.62840400 | -2.04441500 | -0.76724000 |
| H | -1.79393900 | -1.91504300 | 0.98881200  |

**16**

|   |            |             |             |
|---|------------|-------------|-------------|
| C | 3.57946600 | -1.01800500 | -1.51958900 |
| C | 3.02780300 | -1.93510400 | -0.43685500 |
| C | 2.09819900 | -0.98922000 | 0.33419400  |
| C | 2.34610900 | -0.22889000 | -1.92705900 |

|   |             |             |             |
|---|-------------|-------------|-------------|
| H | 4.34523800  | -0.35031600 | -1.10057900 |
| H | 4.02843400  | -1.55540900 | -2.36024200 |
| H | 3.78142400  | -2.39648800 | 0.20796400  |
| H | 2.42543400  | -2.73428800 | -0.88980200 |
| H | 1.28568800  | -1.55634300 | 0.81044400  |
| H | 1.74190100  | -0.80906000 | -2.64370900 |
| H | 2.57704900  | 0.73058700  | -2.40042800 |
| N | 1.62348500  | -0.01800500 | -0.65658100 |
| C | 2.86602300  | -0.31794900 | 1.47345000  |
| O | 3.25832200  | -0.94217100 | 2.43577400  |
| O | 3.10055600  | 0.98115500  | 1.32971900  |
| C | 0.16571700  | 0.19451100  | -0.76228200 |
| C | -0.56927700 | -1.09539000 | -1.13619500 |
| H | -1.63301400 | -0.91301000 | -1.32208100 |
| H | -0.13639100 | -1.52403600 | -2.04667300 |
| H | -0.50562400 | -1.84017900 | -0.33483000 |
| N | -0.02984100 | 1.15470400  | -1.81264900 |
| H | 2.63015800  | 1.28941800  | 0.51682200  |
| H | -1.00210500 | 1.23579800  | -2.08621200 |
| N | -0.24361500 | 0.74280600  | 0.56445600  |
| H | -0.11912700 | 0.04162700  | 1.29206300  |
| H | 0.82057600  | 2.32371200  | 0.61121800  |
| C | -2.78022000 | 0.48938600  | 0.49713400  |
| C | -3.00356400 | -0.62018500 | 1.31699100  |
| C | -3.69789800 | 0.76818100  | -0.51632800 |
| C | -4.09848200 | -1.45088000 | 1.10713400  |
| H | -2.30630400 | -0.84155900 | 2.12599100  |
| C | -4.79949300 | -0.05876600 | -0.72995800 |
| H | -3.54459300 | 1.64114000  | -1.15163300 |
| C | -4.99741600 | -1.17565800 | 0.07649100  |
| H | -4.25569500 | -2.31360500 | 1.75036700  |
| H | -5.50138300 | 0.16890700  | -1.52891300 |
| H | -5.85262100 | -1.82597500 | -0.09029600 |
| C | -1.56646100 | 1.36274100  | 0.70409900  |
| H | -1.59145400 | 1.77960900  | 1.72070200  |
| H | -1.61297700 | 2.22549300  | 0.02642000  |
| O | 1.34682200  | 3.06004400  | 0.22832700  |
| H | 0.34462700  | 2.06791200  | -1.56115300 |
| H | 1.56191400  | 3.65868500  | 0.95005300  |

17

|   |             |             |            |
|---|-------------|-------------|------------|
| C | -2.69847100 | 0.67416000  | 2.20697800 |
| C | -2.28191900 | -0.77347300 | 1.97824500 |
| C | -2.17477500 | -0.85098200 | 0.44917500 |
| C | -1.84137100 | 1.40766400  | 1.19139700 |
| H | -3.76550100 | 0.80911600  | 1.98244900 |
| H | -2.52466300 | 1.01858200  | 3.23058600 |
| H | -2.96969900 | -1.52142500 | 2.38366000 |
| H | -1.29066600 | -0.94976500 | 2.41731200 |
| H | -1.42282400 | -1.59408800 | 0.14861600 |
| H | -0.81794300 | 1.52673100  | 1.58108300 |
| H | -2.22072900 | 2.40003800  | 0.92608500 |
| N | -1.86981400 | 0.51973300  | 0.01312000 |

|   |             |             |             |
|---|-------------|-------------|-------------|
| C | -3.49855200 | -1.32842400 | -0.15241500 |
| O | -3.89555000 | -2.46538000 | -0.03306100 |
| O | -4.18686300 | -0.38376100 | -0.78777100 |
| C | -0.82843400 | 0.72332000  | -1.00210800 |
| C | -1.16495600 | -0.10232000 | -2.24076200 |
| H | -2.16527000 | 0.15529600  | -2.60139400 |
| H | -0.45691100 | 0.10712800  | -3.04882500 |
| H | -1.12583900 | -1.17918000 | -2.04277300 |
| N | -0.84594700 | 2.11862600  | -1.37889700 |
| H | -3.60444300 | 0.41655200  | -0.74918900 |
| H | -0.40422200 | 2.26087600  | -2.28081900 |
| N | 0.48620000  | 0.35233700  | -0.39416900 |
| H | 1.13606700  | 1.88618800  | 0.61344000  |
| H | 0.39914300  | -0.54357000 | 0.08650400  |
| C | 2.83891300  | -0.25497100 | -0.58126700 |
| C | 3.76743800  | 0.61009900  | 0.00200900  |
| C | 3.02393300  | -1.63388300 | -0.45020300 |
| C | 4.85693900  | 0.10455900  | 0.70686800  |
| H | 3.62723500  | 1.68567500  | -0.09834200 |
| C | 4.10914300  | -2.14270000 | 0.25821700  |
| H | 2.31105900  | -2.31471800 | -0.91763500 |
| C | 5.02845200  | -1.27177300 | 0.83912000  |
| H | 5.57712800  | 0.78812200  | 1.15088100  |
| H | 4.24196600  | -3.21820300 | 0.34949500  |
| H | 5.88091000  | -1.66518400 | 1.38783900  |
| C | 1.63366800  | 0.26667200  | -1.31243500 |
| H | 1.42963700  | -0.39100500 | -2.17401900 |
| H | 1.83274800  | 1.27314200  | -1.70589900 |
| O | 1.33933100  | 2.83740700  | 0.74163900  |
| H | 1.62576200  | 2.94049800  | 1.65388700  |
| H | -0.36141100 | 2.70050900  | -0.69668700 |

**18**

|   |             |             |             |
|---|-------------|-------------|-------------|
| N | -0.34822200 | -0.81377500 | 0.34530700  |
| H | -0.86474900 | -1.28411400 | 1.08716300  |
| H | -0.11252900 | 0.97289700  | 0.44275600  |
| C | -2.56805200 | -0.22940500 | -0.47141000 |
| C | -3.54035000 | -1.13579700 | -0.03890500 |
| C | -2.88189200 | 1.13084900  | -0.50880700 |
| C | -4.79949800 | -0.69513900 | 0.35871200  |
| H | -3.30664500 | -2.20128000 | -0.02268100 |
| C | -4.14202900 | 1.57438300  | -0.11510800 |
| H | -2.13149800 | 1.84562900  | -0.84325200 |
| C | -5.10178900 | 0.66407200  | 0.32166700  |
| H | -5.54609100 | -1.41267300 | 0.69137800  |
| H | -4.37428600 | 2.63617500  | -0.14953500 |
| H | -6.08491100 | 1.01290800  | 0.62891700  |
| C | -1.20350500 | -0.73479100 | -0.85076300 |
| H | -0.72164600 | -0.06079300 | -1.57215300 |
| H | -1.31197100 | -1.71726700 | -1.33892000 |
| C | 4.12854600  | 0.28979800  | -0.65483600 |
| C | 3.70591700  | 0.81174400  | 0.71070100  |
| C | 2.19005400  | 0.68208400  | 0.66249700  |

|   |            |             |             |
|---|------------|-------------|-------------|
| C | 3.19768500 | -0.89439300 | -0.83278200 |
| H | 3.94110100 | 1.05011700  | -1.42423600 |
| H | 5.18343300 | 0.00281900  | -0.70731900 |
| H | 4.02376400 | 1.83685100  | 0.91752800  |
| H | 4.09907400 | 0.15540100  | 1.49948500  |
| H | 1.77712000 | 0.46360800  | 1.65885200  |
| H | 3.58130900 | -1.76631300 | -0.27434700 |
| H | 3.08830500 | -1.20236100 | -1.87765600 |
| N | 1.91121300 | -0.42524700 | -0.28411800 |
| C | 1.50013700 | 1.95986700  | 0.18557300  |
| O | 2.08057700 | 2.96685100  | -0.15438400 |
| O | 0.16942100 | 1.89525800  | 0.19037200  |
| C | 0.98487800 | -1.46328000 | 0.17843800  |
| C | 1.35470800 | -2.07433400 | 1.53177200  |
| H | 1.19971500 | -1.37080500 | 2.35626000  |
| H | 0.74006300 | -2.96047600 | 1.73237400  |
| H | 2.40284400 | -2.38953900 | 1.52810500  |
| N | 1.04212100 | -2.52661800 | -0.80029100 |
| H | 0.39479900 | -3.27421400 | -0.57109000 |
| H | 0.83816700 | -2.18790000 | -1.73630800 |

**19**

|   |             |             |             |
|---|-------------|-------------|-------------|
| N | -0.63820200 | -0.31488400 | 0.16395200  |
| H | 1.63063500  | 1.51232000  | -0.91626500 |
| H | -0.68706300 | -0.84161500 | -0.70441100 |
| C | -3.06775100 | -0.15817100 | 0.33217800  |
| C | -3.21981700 | 1.17778200  | -0.05209400 |
| C | -4.11787600 | -1.04708300 | 0.10573500  |
| C | -4.39979000 | 1.61441500  | -0.64270600 |
| H | -2.39654900 | 1.87157200  | 0.11334000  |
| C | -5.30316300 | -0.61378900 | -0.48815900 |
| H | -4.00731600 | -2.09063900 | 0.39984300  |
| C | -5.44655600 | 0.71818800  | -0.86295700 |
| H | -4.50613700 | 2.65725200  | -0.93314000 |
| H | -6.11240500 | -1.32020900 | -0.65882600 |
| H | -6.36943500 | 1.06005200  | -1.32577100 |
| C | -1.79626300 | -0.61533700 | 0.99475500  |
| H | -1.88930700 | -1.68605500 | 1.25314800  |
| H | -1.67162800 | -0.07528100 | 1.94619100  |
| C | 3.13254800  | -1.94168200 | -1.27117500 |
| C | 3.90821600  | -0.66661200 | -0.98044700 |
| C | 3.02238400  | 0.02746900  | 0.06269800  |
| C | 1.69747100  | -1.43432100 | -1.30344500 |
| H | 3.43383700  | -2.43546900 | -2.20058300 |
| H | 3.26220200  | -2.65868400 | -0.44790400 |
| H | 3.97395900  | -0.05028900 | -1.88940900 |
| H | 4.92442800  | -0.82095500 | -0.60771800 |
| H | 3.29271400  | -0.30145400 | 1.07662600  |
| H | 0.96940000  | -2.22012700 | -1.06935400 |
| H | 1.44461700  | -1.04766900 | -2.30220000 |
| N | 1.65303400  | -0.33637700 | -0.31371100 |
| C | 3.23836200  | 1.52833200  | 0.00824700  |
| O | 4.20455200  | 2.07582300  | 0.48814400  |

|   |            |             |             |
|---|------------|-------------|-------------|
| O | 2.31453600 | 2.18905900  | -0.69553300 |
| C | 0.67997300 | -0.44509300 | 0.79596900  |
| C | 0.86753800 | -1.73888500 | 1.59517300  |
| H | 1.88044400 | -1.79325100 | 2.00995400  |
| H | 0.16337400 | -1.79194100 | 2.43337200  |
| H | 0.69960400 | -2.62320000 | 0.97144100  |
| N | 0.92193400 | 0.66997000  | 1.68483200  |
| H | 0.43145100 | 1.49979500  | 1.36133600  |
| H | 0.65145500 | 0.47455000  | 2.64131200  |

**20**

|   |             |             |             |
|---|-------------|-------------|-------------|
| N | -0.63873800 | -0.32176300 | 0.16824500  |
| H | 1.63365700  | 1.48878900  | -0.96336200 |
| H | -0.66988700 | -0.83189700 | -0.70955000 |
| C | -3.06845100 | -0.17326400 | 0.33032400  |
| C | -3.22652200 | 1.17584800  | -0.00318500 |
| C | -4.11082400 | -1.05876200 | 0.05880800  |
| C | -4.40362900 | 1.62748700  | -0.58826900 |
| H | -2.41008200 | 1.86715900  | 0.20130600  |
| C | -5.29383200 | -0.61039000 | -0.52877600 |
| H | -3.99607800 | -2.11227000 | 0.31351000  |
| C | -5.44258500 | 0.73412600  | -0.85328300 |
| H | -4.51481200 | 2.68043400  | -0.83797900 |
| H | -6.09718000 | -1.31452800 | -0.73382400 |
| H | -6.36356700 | 1.08813400  | -1.31087500 |
| C | -1.80061100 | -0.64667000 | 0.98717200  |
| H | -1.89132800 | -1.72577700 | 1.20915400  |
| H | -1.66681500 | -0.13289600 | 1.94923800  |
| C | 3.14826400  | -1.94071200 | -1.25036900 |
| C | 3.91692400  | -0.66066500 | -0.96405100 |
| C | 3.01646300  | 0.03932000  | 0.06466400  |
| C | 1.71200200  | -1.43925800 | -1.29523200 |
| H | 3.45873800  | -2.43723200 | -2.17517100 |
| H | 3.27668500  | -2.65283900 | -0.42294300 |
| H | 3.98720100  | -0.05026500 | -1.87631100 |
| H | 4.93018200  | -0.80589800 | -0.58008200 |
| H | 3.29958700  | -0.28438700 | 1.07977900  |
| H | 0.98394700  | -2.22510900 | -1.06351200 |
| H | 1.46574400  | -1.05623400 | -2.29691700 |
| N | 1.65300600  | -0.33495000 | -0.30950700 |
| C | 3.22584000  | 1.54234200  | -0.01439100 |
| O | 4.17132500  | 2.10708400  | 0.48629600  |
| O | 2.30710300  | 2.17905000  | -0.74352900 |
| C | 0.66779700  | -0.44975500 | 0.80651400  |
| C | 0.87178600  | -1.74718400 | 1.59668000  |
| H | 1.88693000  | -1.79994300 | 2.00952100  |
| H | 0.17233000  | -1.79564600 | 2.43656400  |
| H | 0.71332900  | -2.63203900 | 0.97103100  |
| N | 0.76453000  | 0.64453200  | 1.73739900  |
| H | 1.59213900  | 0.62822500  | 2.32236300  |
| H | 0.65453400  | 1.54565000  | 1.28331500  |

**21**



|   |             |             |             |
|---|-------------|-------------|-------------|
| N | -0.48485200 | -0.35540700 | 0.10380100  |
| H | 3.57452600  | -0.37896700 | 1.05454100  |
| H | -0.28530400 | -0.02237700 | -0.83605200 |
| C | -2.91562000 | -0.54823600 | -0.12353600 |
| C | -3.22855000 | 0.56028700  | 0.66938700  |
| C | -3.84476800 | -0.97936100 | -1.07009000 |
| C | -4.44516000 | 1.21676100  | 0.52301700  |
| H | -2.49901900 | 0.90560800  | 1.40151800  |
| C | -5.06671300 | -0.32429400 | -1.22048600 |
| H | -3.60813900 | -1.83950300 | -1.69618600 |
| C | -5.37001300 | 0.77535000  | -0.42394100 |
| H | -4.67668300 | 2.07608300  | 1.14879100  |
| H | -5.77972000 | -0.67359000 | -1.96407200 |
| H | -6.32153600 | 1.28910400  | -0.54026200 |
| C | -1.61429100 | -1.27903500 | 0.07577300  |
| H | -1.51570200 | -2.06229500 | -0.69723700 |
| H | -1.62794600 | -1.79325000 | 1.04602700  |
| C | 1.52879700  | 2.52887300  | -0.08514100 |
| C | 2.70203600  | 1.91487900  | -0.83032700 |
| C | 2.41888300  | 0.40985300  | -0.70793400 |
| C | 1.37239600  | 1.59113200  | 1.10266400  |
| H | 1.70055900  | 3.56890400  | 0.20996300  |
| H | 0.62436200  | 2.49903500  | -0.70865000 |
| H | 3.64480900  | 2.15923400  | -0.31893500 |
| H | 2.79962900  | 2.22356600  | -1.87481000 |
| H | 1.79423500  | 0.08197100  | -1.55445300 |
| H | 0.34263400  | 1.57397600  | 1.47471800  |
| H | 2.03262100  | 1.89018400  | 1.92999900  |
| N | 1.77288900  | 0.25146300  | 0.60233800  |
| C | 3.73389200  | -0.34703100 | -0.79010900 |
| O | 4.28648100  | -0.60518700 | -1.83394300 |
| O | 4.26645100  | -0.63557700 | 0.39977900  |
| C | 0.74786300  | -0.81534100 | 0.74432400  |
| C | 1.28707100  | -2.12327300 | 0.16941700  |
| H | 2.21311800  | -2.43044700 | 0.66945600  |
| H | 0.54524800  | -2.91144100 | 0.32678000  |
| H | 1.48119200  | -2.05260900 | -0.90668400 |
| N | 0.42560800  | -1.05285600 | 2.13534000  |
| H | 1.25074300  | -1.34983300 | 2.64793800  |
| H | 0.05647200  | -0.21302200 | 2.57247100  |

## 22

|   |             |             |             |
|---|-------------|-------------|-------------|
| N | -0.47778800 | -0.36555100 | 0.12944100  |
| H | 3.55558700  | -0.44116900 | 1.00623500  |
| H | -0.29782200 | -0.01791900 | -0.81035000 |
| C | -2.90707300 | -0.53811300 | -0.11778600 |
| C | -3.21230600 | 0.59009800  | 0.64985300  |
| C | -3.83584100 | -0.98285500 | -1.05811200 |
| C | -4.42414200 | 1.25142300  | 0.48635000  |
| H | -2.48111100 | 0.94862000  | 1.37397000  |
| C | -5.05185900 | -0.32139500 | -1.22665400 |
| H | -3.60357600 | -1.85741100 | -1.66550900 |
| C | -5.34941700 | 0.79642000  | -0.45348700 |

|   |             |             |             |
|---|-------------|-------------|-------------|
| H | -4.65087600 | 2.12561300  | 1.09285600  |
| H | -5.76491200 | -0.68030800 | -1.96548300 |
| H | -6.29692900 | 1.31428200  | -0.58300900 |
| C | -1.61268500 | -1.27676800 | 0.10314400  |
| H | -1.51874800 | -2.07847600 | -0.65193100 |
| H | -1.65872500 | -1.77845800 | 1.08142300  |
| C | 1.52397500  | 2.53248400  | 0.02451500  |
| C | 2.67307400  | 1.94663600  | -0.77924800 |
| C | 2.39103100  | 0.43709400  | -0.71123500 |
| C | 1.39676100  | 1.54633200  | 1.17611900  |
| H | 1.70855600  | 3.55919700  | 0.35648200  |
| H | 0.60210400  | 2.52956300  | -0.57420400 |
| H | 3.63079500  | 2.16803400  | -0.28570600 |
| H | 2.74174300  | 2.29784900  | -1.81247000 |
| H | 1.75451100  | 0.13950200  | -1.56076800 |
| H | 0.37858800  | 1.51715700  | 1.57735600  |
| H | 2.08151000  | 1.80087200  | 1.99785800  |
| N | 1.77483400  | 0.23293800  | 0.60106400  |
| C | 3.70694500  | -0.31489500 | -0.83761100 |
| O | 4.25225600  | -0.52151400 | -1.89750700 |
| O | 4.24424000  | -0.66226200 | 0.33237100  |
| C | 0.77505300  | -0.83836600 | 0.74757800  |
| C | 1.29521100  | -2.13327700 | 0.13025700  |
| H | 2.22422100  | -2.45617200 | 0.61141800  |
| H | 0.55238300  | -2.92786000 | 0.26247500  |
| H | 1.46896100  | -2.03108500 | -0.94642200 |
| N | 0.59015200  | -1.07033600 | 2.16823600  |
| H | -0.06621800 | -0.40454300 | 2.56742700  |
| H | 0.24522400  | -2.00535200 | 2.35616100  |

## 23

|   |             |             |             |
|---|-------------|-------------|-------------|
| N | -0.70956700 | -0.23429700 | -0.16574700 |
| H | 2.55715600  | -0.94530500 | 1.46406400  |
| H | -0.75980500 | 0.23451900  | -1.06795400 |
| C | -3.13257500 | -0.46944300 | -0.01403300 |
| C | -3.35641800 | 0.61797600  | 0.83564300  |
| C | -4.16635200 | -0.89634800 | -0.84711600 |
| C | -4.58989200 | 1.25961600  | 0.85447600  |
| H | -2.54642400 | 0.96065800  | 1.47809200  |
| C | -5.40472200 | -0.25577500 | -0.83141300 |
| H | -3.99939200 | -1.73912300 | -1.51739000 |
| C | -5.61902700 | 0.82373200  | 0.01950200  |
| H | -4.75151500 | 2.10300300  | 1.52212500  |
| H | -6.19981200 | -0.59908600 | -1.48937800 |
| H | -6.58292300 | 1.32714100  | 0.03237500  |
| C | -1.80400300 | -1.17959200 | -0.01332000 |
| H | -1.82320900 | -1.96711500 | -0.78877700 |
| H | -1.67487100 | -1.69596800 | 0.95059300  |
| C | 2.21616500  | 2.59814700  | -0.35592900 |
| C | 3.39174800  | 1.73801900  | -0.82847900 |
| C | 2.88834300  | 0.26724700  | -0.74631000 |
| C | 1.40382000  | 1.63311100  | 0.48876600  |
| H | 2.54163700  | 3.48445300  | 0.19814500  |

|   |            |             |             |
|---|------------|-------------|-------------|
| H | 1.60950900 | 2.93099300  | -1.20656500 |
| H | 4.25882400 | 1.87040400  | -0.17169600 |
| H | 3.72386800 | 1.98691900  | -1.83995100 |
| H | 2.92164000 | -0.20700300 | -1.73641900 |
| H | 0.35433500 | 1.91894700  | 0.60949600  |
| H | 1.85265400 | 1.53411800  | 1.49783400  |
| N | 1.51153100 | 0.40366300  | -0.29137100 |
| C | 3.89860200 | -0.51879600 | 0.09910600  |
| O | 5.02356000 | -0.68521000 | -0.32644900 |
| O | 3.54653600 | -0.96715100 | 1.29739500  |
| C | 0.65810200 | -0.72050200 | 0.02732300  |
| C | 1.00210500 | -1.91611000 | -0.85451800 |
| H | 2.01215200 | -2.29757700 | -0.67070200 |
| H | 0.30463000 | -2.73858600 | -0.66275700 |
| H | 0.91711800 | -1.63604600 | -1.91010900 |
| N | 0.84875400 | -1.11992100 | 1.43797200  |
| H | 0.34229300 | -0.47982400 | 2.04742200  |
| H | 0.51096900 | -2.06043800 | 1.62582100  |

## 24

|   |             |             |             |
|---|-------------|-------------|-------------|
| N | -0.47905100 | -0.36200900 | 0.75232100  |
| H | 0.53553600  | 2.54957400  | -0.88664700 |
| H | -0.70776300 | -1.14059400 | 0.14544200  |
| C | -2.84675000 | 0.08258000  | 0.43895700  |
| C | -2.88066300 | 0.24637100  | -0.94990100 |
| C | -3.97295100 | -0.41678000 | 1.09245300  |
| C | -4.02118600 | -0.09040000 | -1.67093700 |
| H | -2.00516400 | 0.64517700  | -1.46227700 |
| C | -5.11972100 | -0.74619400 | 0.37242100  |
| H | -3.95268000 | -0.54500900 | 2.17388200  |
| C | -5.14429700 | -0.58636000 | -1.00975800 |
| H | -4.03746000 | 0.04101800  | -2.75015900 |
| H | -5.99291500 | -1.13214700 | 0.89293700  |
| H | -6.03723600 | -0.84615700 | -1.57317400 |
| C | -1.61126800 | 0.45706300  | 1.20532900  |
| H | -1.77129300 | 0.31330800  | 2.28253000  |
| H | -1.36081300 | 1.51129700  | 1.01181400  |
| C | 2.85758000  | -2.69889300 | -0.40660500 |
| C | 3.74974500  | -1.48081100 | -0.61040700 |
| C | 3.14122000  | -0.38839800 | 0.27965600  |
| C | 1.47882700  | -2.07623000 | -0.27452000 |
| H | 2.91004100  | -3.41792800 | -1.22911000 |
| H | 3.11501300  | -3.22327400 | 0.52264200  |
| H | 3.70130400  | -1.15701900 | -1.65892900 |
| H | 4.80072700  | -1.65677600 | -0.36877100 |
| H | 3.66656500  | -0.31430300 | 1.23999900  |
| H | 0.76029900  | -2.71467400 | 0.25384300  |
| H | 1.06648800  | -1.80243300 | -1.26032800 |
| N | 1.75438900  | -0.86320400 | 0.50024200  |
| C | 3.18503400  | 0.98113500  | -0.45680600 |
| O | 4.29514600  | 1.53939800  | -0.41409800 |
| O | 2.12464800  | 1.32873800  | -1.03210400 |
| C | 0.80379400  | -0.06958100 | 0.96256200  |

|   |             |            |             |
|---|-------------|------------|-------------|
| C | 1.12282000  | 1.10192400 | 1.81935100  |
| H | 2.19617800  | 1.23728300 | 1.94550000  |
| H | 0.69667600  | 2.00792400 | 1.37466200  |
| H | 0.66777100  | 0.95609400 | 2.80647800  |
| N | -0.29529400 | 3.04217900 | -0.54115000 |
| H | -0.93188500 | 3.15156300 | -1.32561100 |
| H | 0.00884400  | 3.98066000 | -0.29578500 |

**25**

|   |             |             |             |
|---|-------------|-------------|-------------|
| C | 3.89566000  | -0.29893300 | -1.09479700 |
| C | 2.75588300  | -1.19016800 | -1.57459900 |
| C | 1.62770800  | -0.85979500 | -0.60883800 |
| C | 3.19097900  | 0.97435300  | -0.62655900 |
| H | 4.40517700  | -0.78182700 | -0.25341500 |
| H | 4.64233300  | -0.10234900 | -1.87036100 |
| H | 3.00853300  | -2.25375500 | -1.57327300 |
| H | 2.43963100  | -0.90646100 | -2.58616700 |
| H | 0.64798100  | -1.06951800 | -1.06674000 |
| H | 3.25803600  | 1.77830000  | -1.37550600 |
| H | 3.64948400  | 1.35456700  | 0.30149300  |
| N | 1.79063700  | 0.58669800  | -0.42686800 |
| C | 1.69743300  | -1.69556500 | 0.67851900  |
| O | 2.62285700  | -2.41726600 | 0.97749100  |
| O | 0.63079200  | -1.58417000 | 1.47721600  |
| C | 1.00373900  | 1.37669700  | 0.51622900  |
| C | 1.03157100  | 2.83869600  | 0.07323100  |
| H | 0.32124600  | 3.41872300  | 0.67268000  |
| H | 2.02617900  | 3.27461700  | 0.21975900  |
| H | 0.78041300  | 2.93508500  | -0.98732600 |
| N | 1.42315800  | 1.35503500  | 1.91603700  |
| H | 2.28669200  | 1.86921500  | 2.05283300  |
| H | 1.55189300  | 0.41030200  | 2.26847600  |
| N | -0.35658100 | 0.80572100  | 0.53646200  |
| H | 0.03502400  | -0.85863000 | 1.13559800  |
| H | -0.83099200 | 1.22806900  | 1.33459200  |
| C | -2.51716200 | 0.32657700  | -0.46925900 |
| C | -2.62580100 | -1.06681400 | -0.42575800 |
| C | -3.66657500 | 1.09653100  | -0.28963200 |
| C | -3.85631000 | -1.67597700 | -0.20836900 |
| H | -1.73594900 | -1.68070200 | -0.56371400 |
| C | -4.90307300 | 0.49048500  | -0.07309500 |
| H | -3.59096800 | 2.18311000  | -0.32166900 |
| C | -4.99935300 | -0.89698200 | -0.03097800 |
| H | -3.92552300 | -2.76069400 | -0.17783200 |
| H | -5.79038500 | 1.10399600  | 0.06414800  |
| H | -5.96244500 | -1.37279000 | 0.13815300  |
| C | -1.17974800 | 0.98433900  | -0.66672700 |
| H | -1.33026100 | 2.04889100  | -0.90757900 |
| H | -0.64548400 | 0.54050300  | -1.51741800 |

**26**

|   |             |            |             |
|---|-------------|------------|-------------|
| C | -3.56483100 | 0.51386700 | -1.42425200 |
| C | -2.26931300 | 1.24151400 | -1.76144700 |

|   |             |             |             |
|---|-------------|-------------|-------------|
| C | -1.36567700 | 0.84647300  | -0.59010700 |
| C | -3.08014200 | -0.83043500 | -0.88493200 |
| H | -4.09977600 | 1.06247200  | -0.63657900 |
| H | -4.24504500 | 0.40750100  | -2.27459900 |
| H | -2.37347600 | 2.32521000  | -1.85392800 |
| H | -1.83754400 | 0.84962500  | -2.69116300 |
| H | -0.30894000 | 0.95522400  | -0.86963300 |
| H | -3.07097300 | -1.60200400 | -1.67188300 |
| H | -3.74290500 | -1.19510400 | -0.08232900 |
| N | -1.72231300 | -0.55488600 | -0.41107100 |
| C | -1.56221100 | 1.84471900  | 0.56281400  |
| O | -1.35144200 | 3.02568000  | 0.36570200  |
| O | -1.97240700 | 1.41379300  | 1.74489200  |
| C | -1.10162300 | -1.42924200 | 0.55210900  |
| C | -1.22356900 | -2.88458900 | 0.09467200  |
| H | -0.67710800 | -3.53307000 | 0.79081500  |
| H | -2.26835600 | -3.21475100 | 0.07579600  |
| H | -0.81117300 | -3.02115600 | -0.91110200 |
| N | -1.74924300 | -1.25742900 | 1.88400800  |
| H | -1.21245400 | -1.70375600 | 2.62554500  |
| H | -2.65945700 | -1.71271400 | 1.88349700  |
| N | 0.27141100  | -0.98854000 | 0.73739100  |
| H | -1.94056900 | 0.41299900  | 1.84174200  |
| H | 0.65137700  | -1.35247800 | 1.60736200  |
| C | 2.47962400  | -0.49026800 | -0.21793200 |
| C | 2.52136500  | 0.77073500  | 0.38267000  |
| C | 3.66135100  | -1.02933800 | -0.73222900 |
| C | 3.71812600  | 1.47868900  | 0.45772300  |
| H | 1.60810200  | 1.19307300  | 0.79774700  |
| C | 4.85810500  | -0.32189100 | -0.66170000 |
| H | 3.64140800  | -2.01746000 | -1.19209200 |
| C | 4.88971800  | 0.93690700  | -0.06560000 |
| H | 3.73286400  | 2.45989800  | 0.92671800  |
| H | 5.76914500  | -0.75699300 | -1.06674500 |
| H | 5.82362700  | 1.49102000  | -0.00623300 |
| C | 1.18982900  | -1.25752900 | -0.35914400 |
| H | 1.42438200  | -2.33139900 | -0.47403800 |
| H | 0.68416300  | -0.96360400 | -1.29181300 |

## 27

|   |            |             |             |
|---|------------|-------------|-------------|
| C | 4.12698500 | -0.54347300 | -0.00517200 |
| C | 3.23962800 | -1.56083600 | -0.70652800 |
| C | 1.84833200 | -0.94325400 | -0.59612500 |
| C | 3.56275000 | 0.77372000  | -0.50540200 |
| H | 4.00144800 | -0.61643600 | 1.08256400  |
| H | 5.19019000 | -0.65291900 | -0.23851800 |
| H | 3.25085700 | -2.55641700 | -0.25533100 |
| H | 3.53215900 | -1.65847300 | -1.76083800 |
| H | 1.22023600 | -1.29138500 | -1.42187900 |
| H | 3.96958200 | 1.02984300  | -1.49387700 |
| H | 3.76036300 | 1.61114700  | 0.16592400  |
| N | 2.11233400 | 0.51888200  | -0.65320500 |
| C | 1.14238600 | -1.33044300 | 0.74874400  |

|   |             |             |             |
|---|-------------|-------------|-------------|
| O | 0.79144800  | -2.52496500 | 0.79052000  |
| O | 1.00575100  | -0.42381200 | 1.60451800  |
| C | 1.19920700  | 1.38992700  | -0.21329600 |
| C | 1.59826400  | 2.56095000  | 0.62471100  |
| H | 0.70836400  | 3.07871000  | 0.98928300  |
| H | 2.18985200  | 2.22612000  | 1.48218500  |
| H | 2.18783200  | 3.27535400  | 0.03954200  |
| N | -1.35311200 | 1.52142800  | 2.05915300  |
| H | -0.67412600 | 0.76121200  | 2.17708100  |
| H | -1.33603500 | 2.08316800  | 2.90522000  |
| N | -0.09036100 | 1.32939300  | -0.52084700 |
| H | -2.27376100 | 1.09084900  | 2.01240500  |
| H | -0.69610900 | 1.78780000  | 0.17781600  |
| C | -2.11376300 | 0.03430700  | -0.93922100 |
| C | -2.17268400 | -1.15368500 | -0.20582700 |
| C | -3.26926500 | 0.80151600  | -1.09757100 |
| C | -3.37631500 | -1.56151200 | 0.36246000  |
| H | -1.27464300 | -1.75673700 | -0.05838200 |
| C | -4.47217800 | 0.39551100  | -0.52525500 |
| H | -3.22403500 | 1.72614200  | -1.67332800 |
| C | -4.52590900 | -0.78853600 | 0.20666600  |
| H | -3.41199300 | -2.48601100 | 0.93351000  |
| H | -5.36687800 | 0.99996200  | -0.65485500 |
| H | -5.46403600 | -1.11173400 | 0.65206900  |
| C | -0.81142900 | 0.52543700  | -1.51055200 |
| H | -1.00540800 | 1.16936000  | -2.37978900 |
| H | -0.19954900 | -0.30503500 | -1.86261000 |

## 28

|   |             |             |             |
|---|-------------|-------------|-------------|
| C | 0.66695600  | 1.15284900  | 0.63075600  |
| N | 0.93520300  | 2.10752500  | -0.44055700 |
| H | 1.84531200  | 2.54676600  | -0.32937900 |
| N | -0.75005000 | 0.86406500  | 0.58522400  |
| H | -1.04884700 | 0.36652400  | 1.41997500  |
| C | -2.73964000 | -0.05752300 | -0.44254700 |
| C | -3.20616800 | -1.36447700 | -0.29970400 |
| C | -3.65688500 | 0.99624400  | -0.38690200 |
| C | -4.56419800 | -1.61933200 | -0.11153800 |
| H | -2.49690200 | -2.19147600 | -0.34282300 |
| C | -5.01154700 | 0.74737100  | -0.19971900 |
| H | -3.29448100 | 2.01824500  | -0.49066500 |
| C | -5.46904400 | -0.56345900 | -0.06168100 |
| H | -4.91404500 | -2.64372100 | -0.00550200 |
| H | -5.71542300 | 1.57581900  | -0.16366900 |
| H | -6.52905300 | -0.75901900 | 0.08295100  |
| C | -1.27423600 | 0.22266000  | -0.61902700 |
| H | -1.10954700 | 0.90319300  | -1.46444100 |
| H | -0.75331500 | -0.71968300 | -0.86615800 |
| H | 0.24216000  | 2.84907600  | -0.37379800 |
| C | 0.97946800  | 1.72404100  | 2.01574600  |
| H | 0.41860500  | 2.65300300  | 2.16214900  |
| H | 0.70672700  | 1.03520600  | 2.82456000  |
| H | 2.04840600  | 1.94908200  | 2.11262900  |

|   |            |             |             |
|---|------------|-------------|-------------|
| N | 1.46659600 | -0.06080100 | 0.33507300  |
| C | 2.46451700 | -2.07394200 | 1.03575600  |
| C | 3.54865000 | -1.00413800 | 1.02947600  |
| C | 2.91881600 | 0.09660800  | 0.16771900  |
| C | 1.20382000 | -1.23772500 | 1.17657700  |
| H | 2.45724200 | -2.62077800 | 0.08269000  |
| H | 2.57758200 | -2.80563900 | 1.84115900  |
| H | 4.51726200 | -1.33257900 | 0.64194800  |
| H | 3.70078000 | -0.61993100 | 2.04719700  |
| H | 3.28587800 | 1.08420400  | 0.48279000  |
| H | 1.05740200 | -0.96234800 | 2.23609000  |
| H | 0.29808100 | -1.76307800 | 0.84412400  |
| C | 3.32855200 | -0.05889000 | -1.29903000 |
| O | 4.47724500 | 0.05574000  | -1.66521300 |
| O | 2.33377100 | -0.35262700 | -2.12851300 |
| H | 1.52143900 | -0.32500600 | -1.56550200 |

**29**

|   |             |             |             |
|---|-------------|-------------|-------------|
| C | 0.66695100  | 1.28845800  | 0.37037800  |
| N | 0.95056700  | 2.10036400  | -0.79218300 |
| H | 0.98008400  | 1.56034300  | -1.65180000 |
| N | -0.75274200 | 0.99792300  | 0.40629400  |
| H | -1.00733600 | 0.53297600  | 1.27399600  |
| C | -2.75449900 | -0.05090600 | -0.46593300 |
| C | -3.16458900 | -1.37647300 | -0.32183600 |
| C | -3.70077300 | 0.96903400  | -0.32695300 |
| C | -4.49803400 | -1.68276900 | -0.05084400 |
| H | -2.43191100 | -2.17677800 | -0.42927900 |
| C | -5.03047400 | 0.66788300  | -0.05620600 |
| H | -3.37985400 | 2.00463600  | -0.43049700 |
| C | -5.43296600 | -0.66098700 | 0.08181800  |
| H | -4.80434600 | -2.72103000 | 0.05496200  |
| H | -5.75846600 | 1.46957600  | 0.04568400  |
| H | -6.47363600 | -0.89713400 | 0.29171900  |
| C | -1.31703800 | 0.29267800  | -0.73705900 |
| H | -1.25533000 | 0.95823100  | -1.61020600 |
| H | -0.76718200 | -0.63294900 | -0.99370800 |
| H | 1.82268400  | 2.60928500  | -0.70154000 |
| C | 1.00434100  | 2.09728300  | 1.61681300  |
| H | 0.45667400  | 3.04320900  | 1.58726900  |
| H | 0.71396100  | 1.56371300  | 2.52804600  |
| H | 2.07737800  | 2.31407600  | 1.67984300  |
| N | 1.44108600  | 0.00078900  | 0.30836600  |
| C | 2.37466000  | -1.86571700 | 1.41440900  |
| C | 3.47261000  | -0.81966100 | 1.27266700  |
| C | 2.90471600  | 0.10401100  | 0.18952100  |
| C | 1.12039500  | -1.01106800 | 1.33209300  |
| H | 2.41070600  | -2.57612000 | 0.57693700  |
| H | 2.43341900  | -2.43968900 | 2.34386600  |
| H | 4.45648000  | -1.21740900 | 1.00691100  |
| H | 3.57391200  | -0.25377400 | 2.20858600  |
| H | 3.27389500  | 1.12997800  | 0.31736100  |
| H | 0.92528300  | -0.54803200 | 2.31568200  |

|   |            |             |             |
|---|------------|-------------|-------------|
| H | 0.22580500 | -1.58232100 | 1.04971800  |
| C | 3.36975500 | -0.33809900 | -1.19821800 |
| O | 4.52072500 | -0.25895000 | -1.56163400 |
| O | 2.40144700 | -0.83574100 | -1.96801400 |
| H | 1.58769400 | -0.75879100 | -1.40761600 |

**30**

|   |             |             |             |
|---|-------------|-------------|-------------|
| C | -0.80549700 | 1.39402000  | 0.21422300  |
| N | -0.73374700 | 2.30731100  | 1.33098200  |
| H | -0.44337500 | 1.85162200  | 2.19099300  |
| N | 0.55045900  | 0.96052600  | -0.12852700 |
| H | 0.54834000  | 0.04768700  | -0.57411500 |
| C | 2.84495400  | 0.34515700  | 0.27739500  |
| C | 3.19404200  | -0.91380200 | 0.76836700  |
| C | 3.59457600  | 0.89628700  | -0.76506900 |
| C | 4.27893100  | -1.60916800 | 0.23622600  |
| H | 2.61333000  | -1.34874800 | 1.58267500  |
| C | 4.67864500  | 0.20689700  | -1.29805100 |
| H | 3.31564400  | 1.87402800  | -1.15597000 |
| C | 5.02384400  | -1.04836400 | -0.79699000 |
| H | 4.54339300  | -2.58721300 | 0.63180000  |
| H | 5.25822400  | 0.64913500  | -2.10515700 |
| H | 5.87304800  | -1.58620300 | -1.21195800 |
| C | 1.65039300  | 1.07344000  | 0.82512900  |
| H | 1.88098000  | 2.13731900  | 0.96751700  |
| H | 1.42474900  | 0.66148400  | 1.82669700  |
| H | -1.64634800 | 2.72273200  | 1.49288900  |
| C | -1.39197800 | 2.16426700  | -0.96431400 |
| H | -0.78363200 | 3.05889000  | -1.11942600 |
| H | -1.36427500 | 1.57942900  | -1.88877400 |
| H | -2.42991200 | 2.46359300  | -0.77201500 |
| N | -1.71064300 | 0.23977900  | 0.52240100  |
| C | -2.02953700 | -1.90252100 | 1.46061000  |
| C | -1.81045900 | -2.09746500 | -0.03313800 |
| C | -2.02707200 | -0.68309300 | -0.58830400 |
| C | -1.33660700 | -0.57253200 | 1.69535300  |
| H | -3.10133200 | -1.82417200 | 1.68959200  |
| H | -1.61271800 | -2.70865000 | 2.07157100  |
| H | -2.46920600 | -2.83269700 | -0.50438200 |
| H | -0.77268300 | -2.40583300 | -0.22077700 |
| H | -1.40791700 | -0.51863400 | -1.47999500 |
| H | -0.24489300 | -0.73555300 | 1.73677800  |
| H | -1.64688600 | -0.08184600 | 2.62525700  |
| C | -3.47699300 | -0.50330700 | -1.04141600 |
| O | -3.93843400 | -1.08015900 | -1.99942000 |
| O | -4.19358800 | 0.31610600  | -0.27504700 |
| H | -3.54429800 | 0.64384800  | 0.39842400  |

**31**

|   |             |            |             |
|---|-------------|------------|-------------|
| C | -0.83304500 | 1.42907200 | 0.15322200  |
| N | -0.90667400 | 2.36512900 | 1.25519300  |
| H | -0.43441800 | 3.22846400 | 1.00170400  |
| N | 0.55629100  | 1.06118100 | -0.17564200 |



|   |             |             |             |
|---|-------------|-------------|-------------|
| H | 0.60493600  | 0.23280400  | -0.76249500 |
| C | 2.80447000  | 0.31985200  | 0.29418300  |
| C | 3.02526800  | -1.01030900 | 0.65627700  |
| C | 3.67548300  | 0.92847000  | -0.61244200 |
| C | 4.10177700  | -1.72053600 | 0.12956800  |
| H | 2.34799200  | -1.48917300 | 1.36465000  |
| C | 4.75294600  | 0.22358100  | -1.13963900 |
| H | 3.49896600  | 1.96370900  | -0.90246500 |
| C | 4.96838700  | -1.10318900 | -0.76871100 |
| H | 4.26619100  | -2.75466100 | 0.42342900  |
| H | 5.42849200  | 0.70928500  | -1.83998000 |
| H | 5.81195500  | -1.65357100 | -1.17850800 |
| C | 1.61402000  | 1.06254500  | 0.83131500  |
| H | 1.89683800  | 2.10246900  | 1.05520000  |
| H | 1.32622400  | 0.60211700  | 1.79251000  |
| H | -0.46054700 | 2.01196300  | 2.09703500  |
| C | -1.42123300 | 2.12342600  | -1.07042900 |
| H | -0.85160900 | 3.03808400  | -1.26246900 |
| H | -1.34052600 | 1.50439100  | -1.96986200 |
| H | -2.47107600 | 2.38605400  | -0.90620800 |
| N | -1.68796900 | 0.27123200  | 0.50833000  |
| C | -2.04060900 | -1.79662800 | 1.57688000  |
| C | -1.75915200 | -2.08926300 | 0.10862600  |
| C | -1.95949600 | -0.71717100 | -0.54829600 |
| C | -1.35702000 | -0.45211000 | 1.74804200  |
| H | -3.12072700 | -1.70685800 | 1.75573200  |
| H | -1.64789900 | -2.55843400 | 2.25686200  |
| H | -2.39400200 | -2.85934000 | -0.33911100 |
| H | -0.71181100 | -2.39782500 | -0.01624700 |
| H | -1.31101200 | -0.61398400 | -1.42889100 |
| H | -0.27082600 | -0.61842300 | 1.84376900  |
| H | -1.70314300 | 0.10633500  | 2.62545500  |
| C | -3.39603400 | -0.57600500 | -1.05778500 |
| O | -3.81877800 | -1.20424000 | -2.00187500 |
| O | -4.14674400 | 0.26753000  | -0.35432900 |
| H | -3.52593200 | 0.64706500  | 0.31948800  |

### 32

|   |             |             |             |
|---|-------------|-------------|-------------|
| C | -0.66685600 | -1.02839900 | 0.16460300  |
| N | -1.00477600 | -1.66296400 | -1.12319400 |
| H | -0.68301900 | -2.62771000 | -1.15452500 |
| N | 0.78022800  | -0.82053800 | 0.29058400  |
| H | 0.95073200  | -0.15143700 | 1.03789000  |
| C | 2.98168500  | -0.12436800 | -0.42386900 |
| C | 3.40389900  | 1.20433800  | -0.48000200 |
| C | 3.85072100  | -1.08983000 | 0.09157200  |
| C | 4.67484200  | 1.56547700  | -0.03528400 |
| H | 2.73060000  | 1.96172300  | -0.88186800 |
| C | 5.11973500  | -0.73434100 | 0.53430100  |
| H | 3.51981900  | -2.12640300 | 0.14334300  |
| C | 5.53480200  | 0.59617500  | 0.47169100  |
| H | 4.99211900  | 2.60442600  | -0.08675500 |
| H | 5.79015100  | -1.49501300 | 0.92786400  |

|   |             |             |             |
|---|-------------|-------------|-------------|
| H | 6.52813700  | 0.87404700  | 0.81618800  |
| C | 1.60140900  | -0.51186900 | -0.87646900 |
| H | 1.66908200  | -1.40965300 | -1.50894000 |
| H | 1.20223700  | 0.29981400  | -1.51228100 |
| H | -0.57949700 | -1.17825500 | -1.90971700 |
| C | -1.08297600 | -1.99174700 | 1.26947900  |
| H | -0.48693200 | -2.90501700 | 1.18367300  |
| H | -0.87606800 | -1.54465100 | 2.24763700  |
| H | -2.14383000 | -2.25959200 | 1.21752000  |
| N | -1.38192100 | 0.22627500  | 0.30607200  |
| C | -2.22143200 | 2.33644300  | -0.37129600 |
| C | -2.87195700 | 1.87635300  | 0.92962800  |
| C | -2.73405300 | 0.35681800  | 0.82727500  |
| C | -1.06610700 | 1.35112300  | -0.57660000 |
| H | -2.94478000 | 2.24429500  | -1.19281500 |
| H | -1.88679800 | 3.37771200  | -0.34696100 |
| H | -3.91164300 | 2.19301500  | 1.04034600  |
| H | -2.30017200 | 2.22260200  | 1.79874300  |
| H | -2.82386000 | -0.10957400 | 1.81795100  |
| H | -0.09614000 | 1.79152600  | -0.29702000 |
| H | -0.99582400 | 1.05588300  | -1.63825000 |
| C | -3.90250000 | -0.20580400 | -0.00516000 |
| O | -5.04742600 | 0.06883600  | 0.29027100  |
| O | -3.63580200 | -0.99007400 | -1.04135900 |
| H | -2.67049000 | -1.24944700 | -1.12676000 |

### 33

|   |             |             |             |
|---|-------------|-------------|-------------|
| C | -0.68990600 | -0.08531100 | 0.96706500  |
| N | 0.01298100  | -2.05874200 | -1.61489400 |
| H | 0.05745100  | -3.07324300 | -1.66755000 |
| N | 0.60455800  | 0.14044900  | 0.72169700  |
| H | 0.84189100  | 0.83789000  | 0.02625200  |
| C | 2.96941500  | -0.31100300 | 0.44711800  |
| C | 3.22350700  | -0.50674700 | -0.91329700 |
| C | 3.90484600  | 0.36594000  | 1.23007900  |
| C | 4.40138200  | -0.03103100 | -1.48167300 |
| H | 2.48430500  | -1.04349100 | -1.50864700 |
| C | 5.08541200  | 0.83955500  | 0.66222000  |
| H | 3.70873200  | 0.51770700  | 2.29094500  |
| C | 5.33389600  | 0.64181500  | -0.69373400 |
| H | 4.59668300  | -0.19178100 | -2.53933200 |
| H | 5.81241900  | 1.36149600  | 1.27970300  |
| H | 6.25685900  | 1.00920200  | -1.13608700 |
| C | 1.68079900  | -0.80999800 | 1.03313600  |
| H | 1.77152500  | -0.91650300 | 2.12133600  |
| H | 1.41739800  | -1.78039900 | 0.58973400  |
| H | 0.14989500  | -1.73221500 | -2.56843900 |
| C | -1.04138500 | -1.21256100 | 1.86886700  |
| H | -0.38464100 | -1.22961800 | 2.74305700  |
| H | -2.07713700 | -1.17256600 | 2.20168000  |
| H | -0.90801100 | -2.15053300 | 1.31598500  |
| N | -1.60888300 | 0.69062700  | 0.43246200  |
| C | -2.66145400 | 2.07216000  | -1.16867200 |

|   |             |             |             |
|---|-------------|-------------|-------------|
| C | -3.60588300 | 1.81976100  | 0.00042200  |
| C | -3.06895700 | 0.52320700  | 0.59622100  |
| C | -1.29767100 | 1.68084400  | -0.61128800 |
| H | -2.92019000 | 1.41586500  | -2.00769300 |
| H | -2.67400700 | 3.10503400  | -1.52750500 |
| H | -4.65167900 | 1.70543600  | -0.29402300 |
| H | -3.53801200 | 2.63529200  | 0.73313600  |
| H | -3.31905700 | 0.43663200  | 1.65902700  |
| H | -0.77325400 | 2.53665800  | -0.16101200 |
| H | -0.64840700 | 1.22685000  | -1.37314700 |
| C | -3.61642900 | -0.73759200 | -0.14754700 |
| O | -4.83716100 | -0.91036500 | 0.01691900  |
| O | -2.78905700 | -1.41078100 | -0.80586800 |
| H | -0.95905700 | -1.82913000 | -1.37419900 |

### 34

|   |             |             |             |
|---|-------------|-------------|-------------|
| N | -0.36220900 | -0.85157700 | 0.43581900  |
| H | -0.90597700 | -1.34111700 | 1.14535500  |
| H | -0.06737800 | 0.90653400  | 0.63177600  |
| C | -2.53247200 | -0.21929100 | -0.47893800 |
| C | -3.54747100 | -1.12527600 | -0.15771300 |
| C | -2.82051600 | 1.14740800  | -0.46510600 |
| C | -4.82294100 | -0.67917100 | 0.17828000  |
| H | -3.33396600 | -2.19477500 | -0.18260800 |
| C | -4.09578600 | 1.59710700  | -0.13249000 |
| H | -2.03689800 | 1.86174400  | -0.71220800 |
| C | -5.09881900 | 0.68604700  | 0.19132800  |
| H | -5.60305500 | -1.39721700 | 0.42101500  |
| H | -4.30698100 | 2.66391900  | -0.12842800 |
| H | -6.09487100 | 1.03890000  | 0.44848800  |
| C | -1.15691100 | -0.73043000 | -0.80437300 |
| H | -0.62184400 | -0.04485200 | -1.47305000 |
| H | -1.23461500 | -1.69157400 | -1.33078200 |
| C | 3.96365000  | 0.29981900  | -1.00682100 |
| C | 3.78978400  | 0.81428100  | 0.41466500  |
| C | 2.29028400  | 0.66720200  | 0.63810900  |
| C | 3.03700800  | -0.90066700 | -1.01047500 |
| H | 3.61532400  | 1.05264100  | -1.72612900 |
| H | 4.99584100  | 0.03583100  | -1.25683800 |
| H | 4.12893900  | 1.84205100  | 0.56437800  |
| H | 4.32681600  | 0.16101100  | 1.11661000  |
| H | 2.06906300  | 0.45017300  | 1.69414900  |
| H | 3.55178800  | -1.75010900 | -0.51490100 |
| H | 2.74021300  | -1.22394100 | -2.01340700 |
| N | 1.87052400  | -0.44279300 | -0.24602900 |
| C | 1.51757700  | 1.94537100  | 0.30471200  |
| O | 2.04032100  | 2.98885300  | -0.02054800 |
| O | 0.19682400  | 1.84933400  | 0.43734100  |
| C | 0.97204400  | -1.45923500 | 0.30564700  |
| C | 1.38812300  | -1.95405500 | 1.69894300  |
| H | 1.24954800  | -1.20114900 | 2.48270100  |
| H | 0.79271100  | -2.83212700 | 1.97751900  |
| H | 2.44366000  | -2.25373800 | 1.68936000  |

|   |            |             |             |
|---|------------|-------------|-------------|
| N | 0.92673400 | -2.56590800 | -0.65034200 |
| H | 1.81482800 | -3.06158800 | -0.66643300 |
| H | 0.23302900 | -3.23882800 | -0.33166000 |

**35**

|   |             |             |             |
|---|-------------|-------------|-------------|
| N | -0.27417500 | -1.12260600 | 0.48713000  |
| H | -0.70324500 | -1.59681800 | 1.27577900  |
| H | 0.99082700  | 0.70051500  | -1.50112800 |
| C | -2.47437000 | -0.43922900 | -0.30286400 |
| C | -3.68404800 | -1.12183700 | -0.43267100 |
| C | -2.49172800 | 0.88124900  | 0.15798200  |
| C | -4.89168900 | -0.50189700 | -0.11306200 |
| H | -3.67982000 | -2.15101000 | -0.79138100 |
| C | -3.69316500 | 1.50271300  | 0.47780700  |
| H | -1.55405700 | 1.42560800  | 0.25821300  |
| C | -4.89798100 | 0.81191100  | 0.34405000  |
| H | -5.82642700 | -1.04786400 | -0.22056300 |
| H | -3.69059800 | 2.53232800  | 0.82806500  |
| H | -5.83754200 | 1.29954700  | 0.59400300  |
| C | -1.17528600 | -1.10886400 | -0.66138200 |
| H | -0.68535000 | -0.56149200 | -1.47635700 |
| H | -1.38294800 | -2.11578700 | -1.06037900 |
| C | 3.96062300  | 0.65307900  | -0.52589600 |
| C | 3.33252100  | 1.19863200  | 0.75090300  |
| C | 1.85817400  | 0.82927800  | 0.56511100  |
| C | 3.23974100  | -0.67598800 | -0.68873600 |
| H | 3.73998000  | 1.31578200  | -1.37396800 |
| H | 5.04679600  | 0.53593000  | -0.46723700 |
| H | 3.47661400  | 2.27122700  | 0.91087000  |
| H | 3.72968700  | 0.66548400  | 1.62546600  |
| H | 1.33961800  | 0.69618700  | 1.52139100  |
| H | 3.72363000  | -1.43245900 | -0.04480500 |
| H | 3.25070200  | -1.05309000 | -1.71762400 |
| N | 1.85792100  | -0.39795300 | -0.25031400 |
| C | 1.11259200  | 1.95098800  | -0.15490200 |
| O | 0.90881200  | 3.03301500  | 0.34882000  |
| O | 0.72015500  | 1.64749400  | -1.39048600 |
| C | 1.09701100  | -1.54408200 | 0.30023100  |
| C | 1.63522900  | -1.98392600 | 1.66654000  |
| H | 1.51243100  | -1.20594100 | 2.42910600  |
| H | 1.10090000  | -2.87947300 | 2.00615000  |
| H | 2.69834600  | -2.24025100 | 1.60331800  |
| N | 1.19095600  | -2.61412700 | -0.69660600 |
| H | 2.13616000  | -2.98797900 | -0.74366700 |
| H | 0.59390600  | -3.38388100 | -0.40205900 |

**36**

|   |             |             |             |
|---|-------------|-------------|-------------|
| N | -0.41219100 | 1.13017000  | -0.22049600 |
| H | -0.96400000 | 1.85038200  | -0.67320200 |
| H | 1.63384400  | 0.11252600  | 1.81553700  |
| C | -2.51333300 | 0.07445900  | 0.33656900  |
| C | -3.61112700 | 0.93123500  | 0.42655600  |
| C | -2.67247900 | -1.16795700 | -0.28127800 |

|   |             |             |             |
|---|-------------|-------------|-------------|
| C | -4.84891400 | 0.55741800  | -0.09337100 |
| H | -3.49494000 | 1.89769900  | 0.91841600  |
| C | -3.90740700 | -1.54785100 | -0.79654200 |
| H | -1.82124900 | -1.84542300 | -0.34668100 |
| C | -4.99796500 | -0.68378000 | -0.70594200 |
| H | -5.69773700 | 1.23272600  | -0.01359900 |
| H | -4.02176300 | -2.52224400 | -1.26592500 |
| H | -5.96404500 | -0.98219600 | -1.10634700 |
| C | -1.17040500 | 0.50190000  | 0.85977200  |
| H | -0.62841500 | -0.37609700 | 1.22999500  |
| H | -1.31908700 | 1.16550100  | 1.73082000  |
| C | 3.88013400  | -0.64742200 | -0.93171800 |
| C | 2.67644400  | -1.47354300 | -1.37893400 |
| C | 1.56480800  | -0.90042000 | -0.49768900 |
| C | 3.29678200  | 0.74699300  | -0.67011900 |
| H | 4.28795100  | -1.06635300 | -0.00177300 |
| H | 4.69231400  | -0.62963700 | -1.66467000 |
| H | 2.80581400  | -2.55021000 | -1.24369400 |
| H | 2.43080300  | -1.27281100 | -2.42837600 |
| H | 0.56806600  | -1.09537300 | -0.91696700 |
| H | 3.51176500  | 1.43495200  | -1.50194200 |
| H | 3.74098800  | 1.18907200  | 0.24017500  |
| N | 1.85857700  | 0.51613300  | -0.55217500 |
| C | 1.60546700  | -1.60451800 | 0.87099500  |
| O | 1.51414400  | -2.81336700 | 0.94017000  |
| O | 1.75326400  | -0.87005900 | 1.96959800  |
| C | 0.96714700  | 1.54515700  | -0.05197600 |
| C | 1.17798500  | 2.82876800  | -0.84915400 |
| H | 0.94111500  | 2.66174600  | -1.90602800 |
| H | 0.53447200  | 3.62346100  | -0.45343100 |
| H | 2.21408800  | 3.17537400  | -0.78068600 |
| N | 1.26936100  | 1.76534300  | 1.39423700  |
| H | 2.15294700  | 2.26404900  | 1.48445200  |
| H | 0.56476900  | 2.35611900  | 1.83180900  |

### 37

|   |             |             |             |
|---|-------------|-------------|-------------|
| N | 0.00422500  | 1.76090500  | -0.65990700 |
| H | 0.03891100  | 2.73757100  | -0.91488900 |
| H | -3.27337500 | 0.24035000  | -1.40403300 |
| C | 2.18930300  | 0.52278800  | -0.61953300 |
| C | 2.81621000  | 1.40929000  | 0.25794800  |
| C | 2.74588500  | -0.74167800 | -0.82566300 |
| C | 3.98552400  | 1.03876900  | 0.91697600  |
| H | 2.38517200  | 2.39410300  | 0.43414700  |
| C | 3.91758500  | -1.11008800 | -0.17073300 |
| H | 2.23577600  | -1.45122900 | -1.47735300 |
| C | 4.54084200  | -0.22059000 | 0.70123200  |
| H | 4.46378800  | 1.73586200  | 1.60124900  |
| H | 4.33591100  | -2.10053600 | -0.33256200 |
| H | 5.45255500  | -0.51015800 | 1.21827900  |
| C | 0.95028100  | 0.90852400  | -1.38636800 |
| H | 0.42826600  | 0.03120400  | -1.77504500 |
| H | 1.23428000  | 1.49267800  | -2.27015900 |

|   |             |             |             |
|---|-------------|-------------|-------------|
| C | -2.53203200 | -1.40198200 | 1.74925700  |
| C | -1.08259500 | -1.84937400 | 1.61405500  |
| C | -0.57761300 | -0.98545800 | 0.46486900  |
| C | -2.44035100 | 0.10779100  | 1.59654300  |
| H | -3.13549700 | -1.82862600 | 0.93780300  |
| H | -2.99236300 | -1.68474800 | 2.70033200  |
| H | -0.96141400 | -2.90973800 | 1.38025100  |
| H | -0.52478500 | -1.62934900 | 2.53472000  |
| H | 0.50672500  | -0.84320200 | 0.51673900  |
| H | -2.24857900 | 0.59497100  | 2.56326800  |
| H | -3.32562800 | 0.55829700  | 1.13524600  |
| N | -1.26133400 | 0.30501300  | 0.71591900  |
| C | -0.93496900 | -1.61034600 | -0.91820700 |
| O | -0.31543000 | -2.66437800 | -1.15367400 |
| O | -1.75839600 | -0.99077200 | -1.63404200 |
| C | -0.98988100 | 1.48090400  | 0.19533800  |
| C | -1.85626100 | 2.63736300  | 0.57185400  |
| H | -1.95666500 | 2.72066400  | 1.65796500  |
| H | -1.45776000 | 3.57882400  | 0.18753600  |
| H | -2.85217300 | 2.46368400  | 0.13735100  |
| N | -4.03743000 | 0.90797400  | -1.23638200 |
| H | -4.86492900 | 0.35584700  | -1.02621700 |
| H | -4.22740200 | 1.36200000  | -2.12570700 |

### 38

|   |             |             |             |
|---|-------------|-------------|-------------|
| N | 0.70442200  | -0.07889300 | 0.25537500  |
| H | 0.90020800  | 0.27323900  | -0.68046800 |
| C | 3.10925400  | -0.42552400 | 0.26373600  |
| C | 3.93453800  | -1.13455300 | -0.60905700 |
| C | 3.53943700  | 0.81603200  | 0.74332200  |
| C | 5.17186800  | -0.61971100 | -0.99359100 |
| H | 3.60603600  | -2.10213100 | -0.98712400 |
| C | 4.77137500  | 1.33405600  | 0.35929300  |
| H | 2.89661100  | 1.37393800  | 1.42307700  |
| C | 5.59199700  | 0.61551800  | -0.51033500 |
| H | 5.80648800  | -1.18604500 | -1.67126500 |
| H | 5.09703700  | 2.29870300  | 0.74197700  |
| H | 6.55665500  | 1.01916700  | -0.80875700 |
| C | 1.77668100  | -0.97862300 | 0.68531700  |
| H | 1.74753400  | -1.05513100 | 1.78108800  |
| H | 1.65591700  | -1.99918600 | 0.28509000  |
| C | -2.31207000 | 2.69079100  | -0.45069400 |
| C | -3.49318700 | 1.71721500  | -0.49801100 |
| C | -2.95544900 | 0.44300700  | 0.16714600  |
| C | -1.13863300 | 1.85356700  | 0.05371400  |
| H | -2.10330000 | 3.10067300  | -1.44427000 |
| H | -2.49874600 | 3.53888600  | 0.21589100  |
| H | -3.77665700 | 1.49129600  | -1.53291900 |
| H | -4.39039300 | 2.07076100  | 0.01543500  |
| H | -3.05692200 | 0.56031600  | 1.26447700  |
| H | -0.98760300 | 2.00403400  | 1.13873300  |
| H | -0.19834500 | 2.10810300  | -0.43844800 |
| N | -1.53195500 | 0.45623400  | -0.22178000 |

|   |             |             |             |
|---|-------------|-------------|-------------|
| C | -3.88378700 | -0.71164900 | -0.19159500 |
| O | -5.06116600 | -0.60572200 | 0.08003200  |
| O | -3.42328700 | -1.79120700 | -0.80624500 |
| C | -0.64046900 | -0.57414400 | 0.32183200  |
| C | -0.98671700 | -1.04431300 | 1.72229700  |
| H | -1.99359400 | -1.46940200 | 1.75858300  |
| H | -0.29991600 | -1.82805000 | 2.05038400  |
| H | -0.92936400 | -0.20446900 | 2.42292200  |
| O | -0.79700700 | -1.75224100 | -0.51693500 |
| H | -0.46208100 | -1.51047400 | -1.39341200 |
| H | -2.43418000 | -1.82226800 | -0.81122200 |

**40**

|   |             |             |             |
|---|-------------|-------------|-------------|
| C | -3.63928300 | 1.20156800  | 1.23578200  |
| C | -2.98088800 | -0.07939300 | 1.72590000  |
| C | -2.18863600 | -0.53506700 | 0.50795900  |
| C | -2.51280100 | 1.82899600  | 0.43914800  |
| H | -4.49067700 | 0.96585200  | 0.58390100  |
| H | -3.99322900 | 1.84963200  | 2.04347200  |
| H | -3.68371600 | -0.84250000 | 2.06943200  |
| H | -2.28048200 | 0.14928900  | 2.54024300  |
| H | -1.26024000 | -1.03411600 | 0.81806600  |
| H | -1.78934000 | 2.29433000  | 1.13417500  |
| H | -2.85436100 | 2.59232500  | -0.26961700 |
| N | -1.90011600 | 0.69437900  | -0.27375100 |
| C | -2.95943700 | -1.52691400 | -0.36131300 |
| O | -4.07425500 | -1.92773700 | -0.12007700 |
| O | -2.29516100 | -1.96746300 | -1.43659000 |
| C | -0.50581800 | 0.88768400  | -0.67272200 |
| C | -0.33426500 | 2.25284000  | -1.31998300 |
| H | 0.64529000  | 2.28675900  | -1.80891600 |
| H | -1.11445400 | 2.42366900  | -2.06985800 |
| H | -0.38247300 | 3.06229200  | -0.58518500 |
| N | 0.44178500  | 0.76106300  | 0.41203900  |
| H | 1.08402300  | 1.54408500  | 0.42756300  |
| C | 2.63630300  | -0.38283000 | 0.45297600  |
| C | 3.12163000  | -0.11115800 | -0.83154100 |
| C | 3.54659700  | -0.54608400 | 1.49685000  |
| C | 4.48851900  | -0.00732400 | -1.06282900 |
| H | 2.41020300  | 0.00858900  | -1.64840400 |
| C | 4.91815000  | -0.44342000 | 1.26800500  |
| H | 3.17613300  | -0.75556200 | 2.49987700  |
| C | 5.39153200  | -0.17299500 | -0.01200600 |
| H | 4.85455300  | 0.19733500  | -2.06658700 |
| H | 5.61632100  | -0.57223400 | 2.09194600  |
| H | 6.46075800  | -0.09199200 | -0.19331000 |
| C | 1.15376800  | -0.48775800 | 0.69996400  |
| H | 0.98290500  | -0.78422300 | 1.74640400  |
| H | 0.74801900  | -1.29063100 | 0.07305900  |
| O | -0.21243700 | -0.12042900 | -1.66250500 |
| H | -1.43762500 | -1.49702600 | -1.51514400 |
| H | -0.64070400 | 0.16218500  | -2.48291000 |

**42**

|   |             |             |             |
|---|-------------|-------------|-------------|
| C | -0.61501300 | -0.67845800 | 0.22229200  |
| N | 0.73926100  | -0.19660100 | 0.20068500  |
| H | 0.87013400  | 0.55071300  | -0.47468800 |
| C | 3.15331900  | -0.45140300 | 0.06964600  |
| C | 4.05357000  | -0.69182700 | -0.96813300 |
| C | 3.50532600  | 0.45773900  | 1.07276400  |
| C | 5.28773600  | -0.04395700 | -1.00469300 |
| H | 3.78725800  | -1.39722700 | -1.75473800 |
| C | 4.73427700  | 1.10729900  | 1.03824200  |
| H | 2.80184800  | 0.65184800  | 1.88074800  |
| C | 5.62983400  | 0.85747100  | -0.00151600 |
| H | 5.97992600  | -0.24296000 | -1.81959700 |
| H | 4.99727400  | 1.80959900  | 1.82607700  |
| H | 6.59098800  | 1.36553500  | -0.02800300 |
| C | 1.82923700  | -1.16412400 | 0.11950200  |
| H | 1.79390500  | -1.80063200 | 1.01462100  |
| H | 1.74730500  | -1.84184600 | -0.74731500 |
| C | -0.88515300 | -1.50444500 | 1.46441900  |
| H | -0.75798300 | -0.88368700 | 2.35575600  |
| H | -1.89590100 | -1.92245300 | 1.45100400  |
| H | -0.19296400 | -2.34807000 | 1.50956400  |
| N | -1.50487800 | 0.43421900  | 0.12049200  |
| C | -3.23867300 | 1.93594500  | 0.42190400  |
| C | -2.84012700 | 0.48266800  | 0.69030300  |
| C | -1.35341500 | 1.41236000  | -0.96006500 |
| H | -4.31651600 | 2.09211000  | 0.50888700  |
| H | -2.72770100 | 2.58125900  | 1.14628000  |
| H | -2.82957000 | 0.27406400  | 1.76852600  |
| H | -0.52361000 | 2.10475500  | -0.74677900 |
| H | -1.14890100 | 0.93343700  | -1.93249400 |
| C | -3.91259700 | -0.44348600 | 0.09209900  |
| O | -5.06400500 | -0.36303300 | 0.46113700  |
| O | -3.55844700 | -1.31354900 | -0.85060500 |
| O | -0.85567700 | -1.62748700 | -0.88845600 |
| H | -2.58013200 | -1.38464600 | -0.97369300 |
| H | -0.43388900 | -1.28142900 | -1.68633700 |
| C | -2.68827100 | 2.15673800  | -0.98270100 |
| H | -3.36329800 | 1.70187100  | -1.72018000 |
| H | -2.57413300 | 3.21187300  | -1.24685800 |

**44**

|   |             |             |             |
|---|-------------|-------------|-------------|
| N | -0.43272200 | 1.03102800  | -0.29085400 |
| H | -1.02541500 | 1.83897800  | -0.45759000 |
| H | 1.66725900  | -0.00005800 | 1.78631000  |
| C | -2.54257400 | -0.05885700 | 0.21107300  |
| C | -3.60751300 | 0.27103300  | 1.04894300  |
| C | -2.81647600 | -0.59011600 | -1.05337900 |
| C | -4.92444800 | 0.07060900  | 0.63768800  |
| H | -3.40247300 | 0.68596500  | 2.03518400  |
| C | -4.12834300 | -0.79055300 | -1.46742200 |
| H | -1.98719600 | -0.84458700 | -1.71209900 |
| C | -5.18717500 | -0.45976100 | -0.62163000 |



|   |             |             |             |
|---|-------------|-------------|-------------|
| H | -5.74484900 | 0.33117400  | 1.30248500  |
| H | -4.32742000 | -1.20950800 | -2.45131400 |
| H | -6.21350300 | -0.61738500 | -0.94500700 |
| C | -1.12152500 | 0.14860300  | 0.65681300  |
| H | -0.61577900 | -0.82568200 | 0.68767800  |
| H | -1.10670900 | 0.54311100  | 1.68395400  |
| C | 4.01670800  | -0.41996000 | -0.79373900 |
| C | 2.91982600  | -1.30541100 | -1.37869600 |
| C | 1.70424800  | -0.88266400 | -0.55042500 |
| C | 3.30450900  | 0.90495500  | -0.50372600 |
| H | 4.39121500  | -0.86213000 | 0.13915400  |
| H | 4.87379900  | -0.29340000 | -1.46148300 |
| H | 3.12668900  | -2.37576100 | -1.30288700 |
| H | 2.73107000  | -1.05501200 | -2.42922300 |
| H | 0.76415700  | -1.13680100 | -1.05797500 |
| H | 3.50353600  | 1.64708300  | -1.29101300 |
| H | 3.64916300  | 1.33803800  | 0.45176900  |
| N | 1.88324400  | 0.55236300  | -0.48163300 |
| C | 1.72400000  | -1.65800800 | 0.77813300  |
| O | 1.69622200  | -2.86903000 | 0.79111100  |
| O | 1.80737100  | -0.96725500 | 1.91665400  |
| C | 0.90417000  | 1.48420300  | -0.00566000 |
| C | 1.10522700  | 2.85017000  | -0.64236000 |
| H | 0.98115000  | 2.77500300  | -1.72702200 |
| H | 0.37272400  | 3.55750600  | -0.23935900 |
| H | 2.10459800  | 3.24721200  | -0.43831500 |
| H | 1.69733200  | 2.31999400  | 1.64392300  |
| O | 1.03430800  | 1.64466800  | 1.45430400  |

**Product**

|   |             |             |             |
|---|-------------|-------------|-------------|
| N | 1.54135300  | -0.70931400 | 0.33754800  |
| H | 1.43929700  | -0.96681400 | 1.30974700  |
| C | -0.83149500 | -0.46577000 | -0.27902500 |
| C | -1.94043800 | -1.23891000 | 0.06160600  |
| C | -0.96407300 | 0.92566600  | -0.32907800 |
| C | -3.16497800 | -0.63718400 | 0.34979100  |
| H | -1.84489900 | -2.32372100 | 0.10050500  |
| C | -2.18268300 | 1.52882400  | -0.04059600 |
| H | -0.10148100 | 1.53314500  | -0.60239200 |
| C | -3.28748200 | 0.74779100  | 0.30048700  |
| H | -4.02212400 | -1.25214600 | 0.61457900  |
| H | -2.27527000 | 2.61152300  | -0.08673800 |
| H | -4.24115600 | 1.22024200  | 0.52421400  |
| C | 0.49502300  | -1.10809300 | -0.58799600 |
| H | 0.84664600  | -0.81450500 | -1.58372100 |
| H | 0.39630500  | -2.20121600 | -0.57959800 |
| C | 2.58719200  | 0.08622500  | -0.01996000 |
| C | 3.55667900  | 0.42139000  | 1.08200500  |
| H | 3.29912700  | -0.02051800 | 2.04907600  |
| H | 4.55300300  | 0.07907800  | 0.78679400  |
| H | 3.60575500  | 1.50928000  | 1.18712800  |
| O | 2.74360700  | 0.50390200  | -1.16322900 |

**TS3-5a**

|   |             |             |             |
|---|-------------|-------------|-------------|
| C | -0.83219900 | 2.60386200  | -0.16809000 |
| C | -1.80564600 | 1.42298200  | -0.02578400 |
| C | -0.92476100 | 0.23179800  | 0.36799500  |
| C | 0.55836100  | 1.99486200  | 0.00958700  |
| H | -0.92927000 | 3.07118100  | -1.15301300 |
| H | -1.01060500 | 3.38446900  | 0.57740400  |
| H | -2.30803800 | 1.21127000  | -0.97672600 |
| H | -2.58816100 | 1.58297500  | 0.71933900  |
| H | -0.76835700 | 0.20882600  | 1.45852200  |
| H | 0.91573900  | 2.11030200  | 1.04494800  |
| H | 1.31174500  | 2.41431400  | -0.66169500 |
| N | 0.38377600  | 0.55247100  | -0.24967500 |
| C | -1.61695000 | -1.08658600 | 0.03279200  |
| O | -2.72708800 | -1.26584400 | 0.48786800  |
| O | -1.03150700 | -1.99138300 | -0.73270600 |
| H | -0.08076300 | -1.76712900 | -0.98517500 |
| C | 1.56912400  | -0.46861400 | 0.04822100  |
| C | 2.88408800  | 0.27445100  | 0.12805800  |
| H | 2.97203000  | 0.87857500  | 1.03895300  |
| H | 3.68153700  | -0.47570600 | 0.12211200  |
| H | 3.02578000  | 0.91214400  | -0.74857600 |
| N | 1.32267500  | -1.23496700 | 1.22145500  |
| H | 1.02848000  | -2.18226000 | 1.01140600  |
| H | 2.10214700  | -1.24925500 | 1.86690700  |
| O | 1.39153100  | -1.13044700 | -1.15242000 |
| H | 0.64698000  | -0.05738300 | -1.29547400 |

**TS3-5b**

|   |             |             |             |
|---|-------------|-------------|-------------|
| C | 1.40694400  | 2.10967100  | 0.94122300  |
| C | 2.00663300  | 1.42914000  | -0.28640300 |
| C | 1.05148300  | 0.27614800  | -0.60138600 |
| C | -0.08012100 | 1.91117600  | 0.72889200  |
| H | 1.72294300  | 1.60053700  | 1.86154700  |
| H | 1.68037800  | 3.16486300  | 1.03057200  |
| H | 3.01773700  | 1.04791700  | -0.12224000 |
| H | 2.03555900  | 2.12745600  | -1.13060100 |
| H | 0.70067600  | 0.33765700  | -1.64024000 |
| H | -0.45967700 | 2.55580900  | -0.07533700 |
| H | -0.69934800 | 2.03600300  | 1.62111800  |
| N | -0.17566900 | 0.50648600  | 0.24902800  |
| C | 1.62256300  | -1.13640500 | -0.39926400 |
| O | 2.80548900  | -1.30398800 | -0.16010800 |
| O | 0.76182900  | -2.10177200 | -0.55334500 |
| H | -0.27529900 | -1.74085600 | -0.68530500 |
| C | -1.59456200 | 0.05332100  | -0.52534300 |
| C | -2.70059900 | 0.53922400  | 0.39471100  |
| H | -2.77892500 | 1.63175700  | 0.42527300  |
| H | -3.63975000 | 0.13381400  | 0.00434500  |
| H | -2.56442000 | 0.15940800  | 1.41246300  |
| N | -1.56997000 | 0.74953500  | -1.77220300 |
| H | -1.59005800 | 0.08786400  | -2.53969400 |
| H | -2.30559300 | 1.43730600  | -1.87897000 |

|   |             |             |             |
|---|-------------|-------------|-------------|
| O | -1.50617400 | -1.26410400 | -0.62597300 |
| H | -0.16629000 | -0.12328100 | 1.07043000  |
| O | -0.94124900 | -1.60060700 | 2.11259100  |
| H | -0.36364100 | -2.33063600 | 2.36005000  |
| H | -1.32802700 | -1.84765500 | 1.24890700  |

**TSIM1-5a**

|   |             |             |             |
|---|-------------|-------------|-------------|
| C | 0.90496700  | 2.62238500  | 0.08211800  |
| C | 1.86657400  | 1.43233600  | 0.11604300  |
| C | 1.05298600  | 0.27221300  | -0.44617800 |
| C | -0.48409100 | 2.00465300  | -0.10071700 |
| H | 0.96498000  | 3.21133700  | 1.00187700  |
| H | 1.12999200  | 3.29828000  | -0.74874300 |
| H | 2.16610400  | 1.19135700  | 1.14426000  |
| H | 2.78363200  | 1.58589400  | -0.45560100 |
| H | 0.96675900  | 0.37051100  | -1.54156500 |
| H | -0.85738500 | 2.15215500  | -1.12254500 |
| H | -1.22663100 | 2.38666500  | 0.60478400  |
| N | -0.31123800 | 0.54156100  | 0.11355500  |
| C | 1.75117900  | -1.07113000 | -0.20738800 |
| O | 2.96389900  | -1.09163800 | -0.24991600 |
| O | 1.04844600  | -2.17442300 | -0.05656000 |
| H | 0.04913600  | -2.01383400 | 0.03857000  |
| C | -1.48571900 | -0.33471500 | -0.41600600 |
| C | -2.80338500 | 0.34562500  | -0.08611700 |
| H | -2.98024100 | 1.24669600  | -0.68090800 |
| H | -3.59546500 | -0.37964500 | -0.29707200 |
| H | -2.85516900 | 0.59130800  | 0.97898000  |
| N | -1.33581300 | -0.47928500 | -1.83463600 |
| H | -0.79185800 | -1.30803500 | -2.06107700 |
| H | -2.24049800 | -0.57776500 | -2.28299000 |
| O | -1.38255700 | -1.52607800 | 0.27883200  |
| H | -0.35330800 | 0.23985100  | 1.28240300  |
| O | -0.77543700 | -0.45768700 | 2.31232900  |
| H | -0.09694900 | -0.86897700 | 2.85804700  |
| H | -1.18361200 | -1.19132800 | 1.40114300  |

**TS3-5b-H<sub>2</sub>O**

|   |             |             |             |
|---|-------------|-------------|-------------|
| C | 0.68724900  | 2.64313000  | 0.09551200  |
| C | 1.77766000  | 1.59141500  | 0.01464700  |
| C | 1.01412900  | 0.36286100  | -0.44496800 |
| C | -0.46459000 | 1.88181700  | 0.72829900  |
| H | 0.97079800  | 3.52088800  | 0.68313800  |
| H | 0.41379000  | 2.99033800  | -0.91046100 |
| H | 2.22054100  | 1.39793300  | 1.00022200  |
| H | 2.59461000  | 1.83439100  | -0.66983100 |
| H | 0.79562400  | 0.45530800  | -1.51941300 |
| H | -1.45938300 | 2.22159600  | 0.43620700  |
| H | -0.41526300 | 1.90356700  | 1.82328900  |
| N | -0.29249800 | 0.44457200  | 0.30352800  |
| C | 1.82146000  | -0.93347400 | -0.28283700 |
| O | 2.97288500  | -0.90082200 | 0.08943600  |
| O | 1.24968000  | -2.05961400 | -0.67555500 |

|   |             |             |             |
|---|-------------|-------------|-------------|
| H | 0.25920600  | -1.95259100 | -0.77064100 |
| C | -1.52886800 | -0.21742500 | -0.38275900 |
| O | -1.28173600 | -1.57637700 | -0.33714100 |
| H | -0.25625100 | -0.26732800 | 1.23493600  |
| O | -0.64781700 | -1.35908900 | 1.95288800  |
| H | 0.03155400  | -1.90506900 | 2.35984700  |
| H | -1.04627700 | -1.73581700 | 0.76417800  |
| C | -1.70622100 | 0.25381300  | -1.80797400 |
| H | -2.66565400 | -0.12122700 | -2.17827100 |
| H | -1.71534500 | 1.34723800  | -1.87499300 |
| H | -0.93167500 | -0.15081100 | -2.46519400 |
| N | -2.65402700 | 0.19804500  | 0.41569700  |
| H | -3.50896300 | -0.11336300 | -0.03526100 |
| H | -2.61064800 | -0.24898400 | 1.33113200  |

**TS5a-6a**

|   |             |             |             |
|---|-------------|-------------|-------------|
| C | 1.36480000  | 1.93222500  | 0.61748900  |
| C | 1.81722800  | 1.29353100  | -0.69106600 |
| C | 0.91297900  | 0.06654400  | -0.77577700 |
| C | -0.15133700 | 1.74232800  | 0.60942700  |
| H | 1.80735100  | 1.39049700  | 1.46363900  |
| H | 1.64947800  | 2.98384300  | 0.711164700 |
| H | 2.87258200  | 1.01418800  | -0.70786500 |
| H | 1.61090300  | 1.95683700  | -1.54006900 |
| H | 0.82030600  | -0.28108500 | -1.81333500 |
| H | -0.67666800 | 2.63162700  | 0.23451200  |
| H | -0.53770000 | 1.51818700  | 1.61424800  |
| N | -0.36299700 | 0.61191600  | -0.30609300 |
| C | 1.50044100  | -1.09869900 | 0.05377600  |
| O | 2.64226600  | -1.44843300 | -0.21445600 |
| O | 0.77087300  | -1.64694600 | 0.97383300  |
| H | -0.34275500 | -1.36946200 | 1.11000500  |
| C | -1.54254600 | -0.06028000 | -0.35320300 |
| C | -2.79541300 | 0.73208700  | -0.12218100 |
| H | -2.93174800 | 1.42710400  | -0.95838600 |
| H | -3.65658300 | 0.06151500  | -0.07143500 |
| H | -2.75425200 | 1.30813200  | 0.80432900  |
| N | -1.65796200 | -1.02035900 | -1.33690300 |
| H | -0.86779200 | -1.64684200 | -1.43436100 |
| H | -2.51620600 | -1.55211300 | -1.25900300 |
| O | -1.56411000 | -1.10779300 | 1.16004800  |
| H | -1.75935400 | -0.60436300 | 1.96086700  |

**TS5b-6b**

|   |             |            |             |
|---|-------------|------------|-------------|
| C | -1.04504000 | 2.48230200 | -0.03025500 |
| C | -1.91610300 | 1.23815900 | 0.03096400  |
| C | -0.98319100 | 0.13661400 | 0.56494200  |
| C | 0.29367400  | 1.92455400 | -0.48170000 |
| H | -1.43280800 | 3.24695600 | -0.70943500 |
| H | -0.93639800 | 2.93057600 | 0.96563400  |
| H | -2.24691400 | 0.96803400 | -0.98203000 |
| H | -2.80905000 | 1.33825600 | 0.65202200  |
| H | -1.07120500 | 0.04910000 | 1.65747800  |

|   |             |             |             |
|---|-------------|-------------|-------------|
| H | 1.12972500  | 2.57041800  | -0.19122400 |
| H | 0.32110200  | 1.77744100  | -1.57645500 |
| N | 0.35834500  | 0.64228400  | 0.21882500  |
| C | -1.46418400 | -1.19409400 | -0.03376400 |
| O | -2.50386300 | -1.63990300 | 0.43663100  |
| O | -0.82332200 | -1.71831300 | -1.02726000 |
| H | 0.29769000  | -1.43651700 | -1.17732900 |
| C | 1.49691300  | -0.08876400 | 0.31060600  |
| O | 1.50223600  | -1.17874600 | -1.18505400 |
| H | 1.70405700  | -0.62077100 | -1.94717900 |
| C | 1.52885100  | -1.19742200 | 1.32061500  |
| H | 1.47498400  | -0.75856900 | 2.32289400  |
| H | 0.70217900  | -1.89828100 | 1.19420300  |
| H | 2.45982300  | -1.76027600 | 1.22367700  |
| N | 2.68569300  | 0.60926400  | 0.21069800  |
| H | 3.49676000  | 0.00398400  | 0.18926700  |
| H | 2.73585400  | 1.31641000  | -0.51116400 |

#### TS6a-6c

|   |             |             |             |
|---|-------------|-------------|-------------|
| C | 1.38282400  | 1.84820700  | 0.74030800  |
| C | 1.85016100  | 1.33840200  | -0.61908800 |
| C | 0.86894200  | 0.21943600  | -0.91801800 |
| C | -0.13413400 | 1.83953000  | 0.61403000  |
| H | 1.69721500  | 1.14465800  | 1.52116700  |
| H | 1.76994800  | 2.83910200  | 0.99362100  |
| H | 2.87708100  | 0.96666700  | -0.60781500 |
| H | 1.76087500  | 2.12615600  | -1.37845200 |
| H | 0.68790500  | 0.07456300  | -1.99311100 |
| H | -0.50723900 | 2.77799900  | 0.17768200  |
| H | -0.64421100 | 1.66410800  | 1.56768500  |
| N | -0.38613200 | 0.72226900  | -0.30906100 |
| C | 1.27434500  | -1.14987800 | -0.32101200 |
| O | 2.35241000  | -1.28848500 | 0.24135800  |
| O | 0.38006600  | -2.07568000 | -0.47152100 |
| H | -0.41721600 | -1.88005000 | 1.33293600  |
| C | -1.58747400 | 0.19712700  | -0.54519700 |
| C | -2.79059000 | 0.88586200  | 0.00073600  |
| H | -2.75650900 | 1.96668800  | -0.16405200 |
| H | -3.70038900 | 0.48446500  | -0.45076100 |
| H | -2.83739800 | 0.70533100  | 1.08168600  |
| N | -1.66175200 | -0.92832000 | -1.22308700 |
| H | -0.70655200 | -1.60887000 | -1.01952800 |
| H | -2.59395100 | -1.29490300 | -1.36622900 |
| O | -0.85877300 | -1.37414600 | 2.03780800  |
| H | -0.46843700 | -1.68917400 | 2.85848800  |

#### TS6d-6b

|   |             |             |             |
|---|-------------|-------------|-------------|
| C | 1.37848600  | 1.91205900  | 0.38129000  |
| C | 1.97188000  | 1.04231800  | -0.72260800 |
| C | 0.97733100  | -0.11171700 | -0.79877100 |
| C | -0.12560600 | 1.83871400  | 0.13852300  |
| H | 1.62020800  | 1.48272100  | 1.36227400  |
| H | 1.74543600  | 2.94214700  | 0.36888100  |

|   |             |             |             |
|---|-------------|-------------|-------------|
| H | 2.98333500  | 0.68640300  | -0.51241400 |
| H | 1.98439700  | 1.58304800  | -1.67779600 |
| H | 1.00712200  | -0.61493300 | -1.77108200 |
| H | -0.48784300 | 2.64475000  | -0.51399500 |
| H | -0.70144800 | 1.87478000  | 1.06511400  |
| N | -0.30557500 | 0.56062800  | -0.58308900 |
| C | 1.27218300  | -1.18190600 | 0.28596300  |
| O | 2.30580000  | -1.82577300 | 0.12137200  |
| O | 0.44871100  | -1.32363800 | 1.25927300  |
| C | -1.49158600 | -0.00444200 | -0.81720300 |
| C | -1.57720900 | -1.10286000 | -1.82494300 |
| H | -2.62113900 | -1.32246800 | -2.06015200 |
| H | -1.04416400 | -0.85579700 | -2.74777600 |
| H | -1.12911700 | -2.01402000 | -1.40845200 |
| N | -2.52458500 | 0.38562400  | -0.09258800 |
| H | -0.59193900 | -0.69705100 | 1.66731200  |
| H | -3.39173000 | -0.06860700 | -0.35880300 |
| O | -1.55571300 | -0.24552300 | 2.06095300  |
| H | -2.17274000 | 0.24739200  | 1.08575400  |
| H | -1.41251500 | 0.29435300  | 2.84458800  |

#### TSIM2

|   |             |             |             |
|---|-------------|-------------|-------------|
| C | 0.73986100  | 2.13626600  | 0.37960900  |
| C | 1.26100000  | 1.39081000  | -0.84391800 |
| C | 0.66383000  | -0.00235700 | -0.65668800 |
| C | -0.69835500 | 1.65001800  | 0.47587900  |
| H | 1.30316300  | 1.83372600  | 1.27368500  |
| H | 0.80671700  | 3.22439400  | 0.29355600  |
| H | 2.35017600  | 1.35777100  | -0.92202900 |
| H | 0.86034500  | 1.83817500  | -1.76203100 |
| H | 0.47967700  | -0.52634700 | -1.60461300 |
| H | -1.35042200 | 2.23968200  | -0.18820700 |
| H | -1.10469000 | 1.70967900  | 1.49209900  |
| N | -0.61218700 | 0.25724200  | 0.01557900  |
| C | 1.60903300  | -0.90238600 | 0.13953900  |
| O | 2.78638800  | -0.98404800 | -0.11995800 |
| O | 1.07661200  | -1.60544600 | 1.14291600  |
| C | -1.70743600 | -0.54713400 | -0.22043100 |
| C | -3.02577100 | -0.00634900 | 0.25331200  |
| H | -3.27116800 | 0.93683200  | -0.24828900 |
| H | -3.82345300 | -0.72415700 | 0.04981400  |
| H | -3.00769600 | 0.19306300  | 1.33095300  |
| N | -1.51822100 | -1.69128100 | -0.77954500 |
| H | 0.11639400  | -1.45792700 | 1.16386000  |
| H | -2.40316300 | -2.18387900 | -0.87851300 |

#### TS6c-6d

|   |             |            |             |
|---|-------------|------------|-------------|
| C | 0.84902100  | 2.01428400 | 0.70118200  |
| C | 1.21101200  | 1.45036900 | -0.66736300 |
| C | 0.57981100  | 0.05491300 | -0.63012300 |
| C | -0.58403500 | 1.53989800 | 0.86255700  |
| H | 1.49237900  | 1.58566400 | 1.48243100  |
| H | 0.93426200  | 3.10352300 | 0.75773300  |

|   |             |             |             |
|---|-------------|-------------|-------------|
| H | 2.28368700  | 1.41064400  | -0.87729500 |
| H | 0.72459700  | 2.03880700  | -1.45500500 |
| H | 0.24823800  | -0.26148800 | -1.62717900 |
| H | -1.26257300 | 2.16835500  | 0.26670900  |
| H | -0.93530400 | 1.52619400  | 1.90068700  |
| N | -0.56198000 | 0.16081400  | 0.31178500  |
| C | 1.57368100  | -0.99484400 | -0.13640200 |
| O | 2.57588900  | -1.28295900 | -0.74895900 |
| O | 1.25024300  | -1.56224000 | 1.02538700  |
| C | -1.82576000 | -0.26994300 | -0.23831900 |
| C | -2.39833700 | -1.47098100 | 0.44100000  |
| H | -2.51074000 | -1.27241300 | 1.51404100  |
| H | -3.36595500 | -1.76214400 | 0.02306400  |
| H | -1.70215900 | -2.31516600 | 0.34954600  |
| N | -2.31618500 | 0.37535700  | -1.21468400 |
| H | 0.40373500  | -1.12207100 | 1.28796200  |
| H | -3.20441700 | -0.03369000 | -1.50901200 |

### TS6a-7

|   |             |             |             |
|---|-------------|-------------|-------------|
| N | -0.36151900 | 0.82846300  | 0.06730000  |
| H | -0.12164000 | -0.17707100 | -0.09410600 |
| H | -0.47888200 | 0.99825600  | 1.06615600  |
| C | -2.77515500 | 0.37871500  | -0.20733300 |
| C | -2.77136800 | -1.01295100 | -0.35347200 |
| C | -3.88016300 | 1.00407500  | 0.36943300  |
| C | -3.86257200 | -1.76172600 | 0.07352900  |
| H | -1.90472500 | -1.50811400 | -0.79518100 |
| C | -4.97536300 | 0.25309900  | 0.79322200  |
| H | -3.88652500 | 2.08791100  | 0.48246400  |
| C | -4.96687900 | -1.13051300 | 0.64607200  |
| H | -3.85183400 | -2.84262800 | -0.04288600 |
| H | -5.83320300 | 0.75055200  | 1.23973600  |
| H | -5.81982200 | -1.71894700 | 0.97574300  |
| C | -1.58778800 | 1.18230200  | -0.66373700 |
| H | -1.78296700 | 2.25622800  | -0.54620600 |
| H | -1.38816200 | 0.98956300  | -1.72631600 |
| C | 3.16928600  | -0.43246300 | 1.96107000  |
| C | 3.88340500  | -0.80661900 | 0.66820100  |
| C | 2.81729200  | -0.53627500 | -0.38443300 |
| C | 2.43130700  | 0.84639200  | 1.58381200  |
| H | 2.44744700  | -1.21944300 | 2.22035100  |
| H | 3.83768100  | -0.29154600 | 2.81562000  |
| H | 4.21414400  | -1.84652400 | 0.63120600  |
| H | 4.74891200  | -0.14949200 | 0.50835700  |
| H | 3.26925000  | -0.29428800 | -1.35755700 |
| H | 3.05484700  | 1.73695400  | 1.76300900  |
| H | 1.50385900  | 0.97172700  | 2.16202800  |
| N | 2.16942900  | 0.67916300  | 0.15239100  |
| C | 1.87006900  | -1.74711600 | -0.63296300 |
| O | 2.39103900  | -2.86872300 | -0.62234000 |
| O | 0.65562500  | -1.46356600 | -0.89451300 |
| C | 1.26404200  | 1.45459700  | -0.52388300 |
| C | 1.19364300  | 2.90513400  | -0.12299600 |

|   |            |            |             |
|---|------------|------------|-------------|
| H | 2.13455300 | 3.39320300 | -0.39962800 |
| H | 0.37275100 | 3.41153700 | -0.64144200 |
| H | 1.04552300 | 3.02512000 | 0.95335100  |
| N | 1.25619000 | 1.25282000 | -1.89826600 |
| H | 1.08340800 | 0.28132900 | -2.15574900 |
| H | 0.67483400 | 1.90094800 | -2.41323900 |

**TS6a-8**

|   |             |             |             |
|---|-------------|-------------|-------------|
| C | 2.63389900  | -0.12550800 | 2.47003900  |
| C | 2.76291100  | 1.12784500  | 1.61334600  |
| C | 1.69819900  | 0.90504000  | 0.56400100  |
| C | 2.35487200  | -1.24318900 | 1.46200700  |
| H | 3.51865400  | -0.34037300 | 3.07695400  |
| H | 1.78282400  | -0.01946900 | 3.15594800  |
| H | 3.74202200  | 1.19278900  | 1.12281300  |
| H | 2.60301100  | 2.05598400  | 2.16983800  |
| H | 0.70478800  | 1.02538400  | 1.04230200  |
| H | 1.62050600  | -1.96288100 | 1.85312300  |
| H | 3.27047700  | -1.80016900 | 1.22004800  |
| N | 1.87169500  | -0.54104600 | 0.25971600  |
| C | 1.67319100  | 1.86592100  | -0.64487500 |
| O | 2.58179000  | 2.69699800  | -0.75109600 |
| O | 0.67230400  | 1.69803700  | -1.41495000 |
| C | 1.56065300  | -1.20452000 | -0.89504500 |
| C | 1.64047600  | -2.70500000 | -0.83552400 |
| H | 1.25730200  | -3.13469200 | -1.76572400 |
| H | 2.68648900  | -3.01148400 | -0.72765500 |
| H | 1.06920600  | -3.11698500 | -0.00054600 |
| N | 2.00499100  | -0.69693800 | -2.10347000 |
| H | 1.82050200  | 0.29403600  | -2.25456700 |
| H | 1.74450200  | -1.25545800 | -2.90702200 |
| N | -0.33026000 | -0.91405600 | -1.02949000 |
| H | -0.24744600 | 0.10770800  | -1.20851800 |
| H | -0.72853100 | -1.35084200 | -1.86070700 |
| C | -2.45428500 | -0.46914900 | 0.19375200  |
| C | -2.50121000 | 0.91686900  | 0.00797900  |
| C | -3.64118200 | -1.16522000 | 0.42259700  |
| C | -3.71814900 | 1.58875500  | 0.05263600  |
| H | -1.58352700 | 1.47572100  | -0.18674200 |
| C | -4.86016300 | -0.49125300 | 0.47208500  |
| H | -3.61164400 | -2.24531900 | 0.56351200  |
| C | -4.90008200 | 0.88727400  | 0.28721900  |
| H | -3.74297700 | 2.66552600  | -0.09594000 |
| H | -5.77843600 | -1.04577200 | 0.65101500  |
| H | -5.84990300 | 1.41549200  | 0.32219800  |
| C | -1.13520700 | -1.19706800 | 0.16413900  |
| H | -1.29788300 | -2.27990900 | 0.23357900  |
| H | -0.52120200 | -0.91006500 | 1.03104100  |

**TS6a-9**

|   |            |             |             |
|---|------------|-------------|-------------|
| C | 2.68973300 | 0.13537600  | 2.20343700  |
| C | 3.63663100 | -0.42899000 | 1.14866100  |
| C | 2.80054200 | -0.45654600 | -0.12605700 |



|   |             |             |             |
|---|-------------|-------------|-------------|
| C | 1.96112500  | 1.22559500  | 1.43555200  |
| H | 1.98248000  | -0.64466300 | 2.51207000  |
| H | 3.20119600  | 0.51720500  | 3.09265600  |
| H | 4.00415300  | -1.42776900 | 1.39638900  |
| H | 4.49486500  | 0.24459800  | 1.01716300  |
| H | 3.41926400  | -0.23558200 | -1.01079200 |
| H | 2.54991600  | 2.16160700  | 1.42786100  |
| H | 0.97091500  | 1.46264100  | 1.85893100  |
| N | 1.83855300  | 0.64906900  | 0.10266300  |
| C | 2.04870300  | -1.79106300 | -0.38414000 |
| O | 2.00433200  | -2.63602100 | 0.52000900  |
| O | 1.49781100  | -1.86314100 | -1.53080500 |
| C | 1.04330500  | 1.26753700  | -0.86623400 |
| C | 1.18449400  | 2.77575500  | -0.95301100 |
| H | 0.52924800  | 3.18595600  | -1.72959900 |
| H | 0.92934300  | 3.25050500  | -0.00050100 |
| H | 2.22276500  | 3.02843600  | -1.19502000 |
| N | 1.12442700  | 0.66983300  | -2.21928700 |
| H | 1.36793400  | -0.36588600 | -2.15312800 |
| H | 1.70414500  | 1.17879000  | -2.88159400 |
| N | -0.49275700 | 0.97537000  | -0.75354400 |
| H | -1.02907300 | 1.78360700  | -0.43519600 |
| H | -0.15805500 | 0.78073400  | -2.01268100 |
| C | -2.38523100 | -0.24746100 | 0.16384600  |
| C | -2.96021300 | 0.41177900  | 1.25338100  |
| C | -3.21664700 | -0.86799500 | -0.77013400 |
| C | -4.34324000 | 0.45552500  | 1.40543600  |
| H | -2.31382300 | 0.88232100  | 1.99590200  |
| C | -4.59989200 | -0.83019000 | -0.61849900 |
| H | -2.77083000 | -1.39223100 | -1.61446400 |
| C | -5.16537500 | -0.16607500 | 0.46791200  |
| H | -4.77978200 | 0.96524900  | 2.26116200  |
| H | -5.23792100 | -1.32449500 | -1.34717400 |
| H | -6.24566400 | -0.13972000 | 0.58849200  |
| C | -0.89690800 | -0.24691800 | -0.01825400 |
| H | -0.55679800 | -1.11780800 | -0.59263500 |
| H | -0.37515600 | -0.27809200 | 0.94832100  |

#### TS6a-10

|   |             |             |             |
|---|-------------|-------------|-------------|
| C | -2.67884200 | 0.13178400  | 2.27190900  |
| C | -1.98795300 | -1.12738900 | 1.76065400  |
| C | -1.82942100 | -0.85358200 | 0.27198300  |
| C | -1.97835700 | 1.24074500  | 1.50046200  |
| H | -3.74261800 | 0.10246000  | 2.00319800  |
| H | -2.60357100 | 0.26439400  | 3.35537600  |
| H | -2.56263300 | -2.03983100 | 1.93344000  |
| H | -1.00146100 | -1.23689600 | 2.23353600  |
| H | -0.92911700 | -1.34286200 | -0.13667300 |
| H | -1.05111500 | 1.55076200  | 2.01662000  |
| H | -2.60772600 | 2.13183400  | 1.38442700  |
| N | -1.70146500 | 0.61955300  | 0.20526700  |
| C | -3.02162700 | -1.35476900 | -0.57918800 |
| O | -3.88330800 | -2.07004800 | -0.07900300 |

|   |             |             |             |
|---|-------------|-------------|-------------|
| O | -2.99489700 | -0.97994500 | -1.81659700 |
| C | -0.98194200 | 1.26926700  | -0.80294200 |
| C | -1.23113400 | 2.75850200  | -0.85931400 |
| H | -0.67918400 | 3.20157200  | -1.69597700 |
| H | -2.29933100 | 2.94296000  | -1.01511300 |
| H | -0.91960900 | 3.26227100  | 0.06254700  |
| N | -1.05384400 | 0.54607000  | -2.05977300 |
| H | -2.05560100 | -0.25900200 | -2.02373800 |
| H | -1.12659700 | 1.18954400  | -2.84514700 |
| N | 0.63380700  | 1.02806400  | -0.66687200 |
| H | 0.27414600  | 0.34700900  | -1.61710900 |
| H | 1.13411400  | 1.83162400  | -1.05315800 |
| C | 2.63934400  | 0.04798300  | 0.34123300  |
| C | 2.78822700  | -1.15615000 | -0.35287900 |
| C | 3.77704600  | 0.72862900  | 0.77382700  |
| C | 4.05349900  | -1.67005900 | -0.61039900 |
| H | 1.90191400  | -1.69387300 | -0.69098800 |
| C | 5.04760300  | 0.21480300  | 0.51829200  |
| H | 3.66757600  | 1.66564800  | 1.31904000  |
| C | 5.18704700  | -0.98336500 | -0.17478300 |
| H | 4.15775600  | -2.60966200 | -1.14750000 |
| H | 5.92798000  | 0.75278600  | 0.86170700  |
| H | 6.17717800  | -1.38647600 | -0.37318200 |
| C | 1.26455800  | 0.60080300  | 0.59278000  |
| H | 1.31042000  | 1.44687300  | 1.29286000  |
| H | 0.61536700  | -0.16020200 | 1.04046600  |

#### TS6a-11

|   |             |             |             |
|---|-------------|-------------|-------------|
| C | -1.46700000 | 1.22628600  | -0.79173700 |
| N | -1.75290000 | 2.10277900  | 0.25615900  |
| H | -2.40944300 | 2.83007400  | -0.00363800 |
| N | 0.41348000  | 1.05629700  | -0.69383800 |
| H | 0.77179900  | 0.71988900  | -1.58890900 |
| H | 0.78049300  | 2.00387400  | -0.53901100 |
| C | 2.29257100  | -0.26539200 | 0.19856400  |
| C | 2.58879800  | -1.56924100 | -0.20105900 |
| C | 3.33814600  | 0.64424900  | 0.38346900  |
| C | 3.90887000  | -1.96113100 | -0.41382900 |
| H | 1.77717100  | -2.28550300 | -0.32814500 |
| C | 4.65653700  | 0.25605000  | 0.17069600  |
| H | 3.11036000  | 1.66230300  | 0.70089200  |
| C | 4.94372800  | -1.04887400 | -0.22929500 |
| H | 4.12877400  | -2.98224600 | -0.71625200 |
| H | 5.46276600  | 0.96981000  | 0.32294400  |
| H | 5.97488200  | -1.35399900 | -0.39070800 |
| C | 0.86635900  | 0.16047500  | 0.39107200  |
| H | 0.71514100  | 0.69222800  | 1.33781200  |
| H | 0.20318400  | -0.71334600 | 0.41238000  |
| O | 0.68574700  | 3.63110200  | 0.54460600  |
| H | 1.06481000  | 3.88615100  | 1.39173800  |
| H | -0.20787900 | 3.28132200  | 0.73060100  |
| C | -1.53577700 | 1.87903500  | -2.14988700 |
| H | -0.99796700 | 2.83301100  | -2.14117100 |

|   |             |             |             |
|---|-------------|-------------|-------------|
| H | -1.12332400 | 1.24940100  | -2.94196000 |
| H | -2.58902000 | 2.07082400  | -2.39030100 |
| N | -1.93381400 | -0.05098100 | -0.68202900 |
| C | -2.15544000 | -2.35235800 | -1.07949200 |
| C | -3.26480700 | -1.90140200 | -0.13623000 |
| C | -2.75933400 | -0.58425300 | 0.43778400  |
| C | -1.71230600 | -1.04987500 | -1.72881000 |
| H | -1.33603400 | -2.78487600 | -0.49379700 |
| H | -2.48240700 | -3.09086500 | -1.81797300 |
| H | -3.46260700 | -2.62523600 | 0.65790400  |
| H | -4.19314600 | -1.72998000 | -0.69879900 |
| H | -3.58265800 | 0.11963900  | 0.62282400  |
| H | -2.31685600 | -0.82267300 | -2.62189000 |
| H | -0.65528300 | -1.06924600 | -2.03716400 |
| C | -1.92701100 | -0.71276500 | 1.74886600  |
| O | -1.45117200 | -1.82680100 | 2.02697600  |
| O | -1.78556900 | 0.37422300  | 2.37964000  |
| H | -1.95218300 | 1.62976800  | 1.16012600  |

#### TS11-12

|   |             |             |             |
|---|-------------|-------------|-------------|
| C | -0.97180300 | 1.19958000  | -0.72904200 |
| N | -1.33626700 | 2.06718600  | 0.36142700  |
| H | -2.15389000 | 2.60769500  | 0.08428400  |
| N | 0.56954000  | 0.98984500  | -0.56701400 |
| H | 0.95725800  | 0.63580200  | -1.44392500 |
| H | 0.93974500  | 1.99701000  | -0.35599200 |
| C | 2.41030200  | -0.34569700 | 0.35826500  |
| C | 2.67410200  | -1.66554000 | -0.01214200 |
| C | 3.47519800  | 0.54569000  | 0.51926300  |
| C | 3.98411300  | -2.09291100 | -0.21556800 |
| H | 1.84603100  | -2.36489500 | -0.12716700 |
| C | 4.78353900  | 0.12129200  | 0.31339600  |
| H | 3.27163400  | 1.57621000  | 0.81089900  |
| C | 5.03916900  | -1.19946700 | -0.05338300 |
| H | 4.18043500  | -3.12513000 | -0.49509900 |
| H | 5.60592300  | 0.82011200  | 0.44497900  |
| H | 6.06258700  | -1.53242800 | -0.20817400 |
| C | 0.99705600  | 0.11062000  | 0.56065600  |
| H | 0.88427700  | 0.70063700  | 1.47690900  |
| H | 0.30195400  | -0.73431800 | 0.61258300  |
| O | 0.75430900  | 3.39390400  | 0.24269600  |
| H | 1.20436100  | 3.67930400  | 1.04256700  |
| H | -0.40217500 | 2.84838800  | 0.45778200  |
| C | -1.13309000 | 1.86817000  | -2.08998200 |
| H | -0.63324900 | 2.84274200  | -2.08731500 |
| H | -0.73123100 | 1.26709700  | -2.91402800 |
| H | -2.20305000 | 2.02164100  | -2.27752000 |
| N | -1.59191600 | -0.08917100 | -0.62377900 |
| C | -2.31055100 | -2.22167800 | -1.20325600 |
| C | -3.50770800 | -1.46607100 | -0.63771800 |
| C | -2.87052600 | -0.28465600 | 0.08617300  |
| C | -1.43109200 | -1.08001000 | -1.68119400 |
| H | -1.80506800 | -2.77731500 | -0.40117500 |

|   |             |             |             |
|---|-------------|-------------|-------------|
| H | -2.57014400 | -2.92319000 | -2.00159100 |
| H | -4.12795300 | -2.06248400 | 0.03507000  |
| H | -4.13458600 | -1.09566300 | -1.45974800 |
| H | -3.50998800 | 0.61091800  | 0.01795200  |
| H | -1.78550200 | -0.71562800 | -2.66314700 |
| H | -0.37439600 | -1.37174300 | -1.79477900 |
| C | -2.62007400 | -0.56108700 | 1.58070000  |
| O | -2.99555700 | -1.58297300 | 2.12559000  |
| O | -1.97417500 | 0.38856700  | 2.22191100  |
| H | -1.70088400 | 1.15483100  | 1.55363400  |

**TS6c-13**

|   |             |             |             |
|---|-------------|-------------|-------------|
| C | 2.35045900  | 2.30828400  | -0.97336800 |
| C | 1.93135700  | 1.12611100  | -1.84202200 |
| C | 2.03307500  | -0.04525700 | -0.87625600 |
| C | 1.70597100  | 2.01051400  | 0.37799500  |
| H | 3.44337100  | 2.32415800  | -0.87728300 |
| H | 2.03842300  | 3.27770200  | -1.37325000 |
| H | 2.56688500  | 0.98558400  | -2.71874200 |
| H | 0.89170600  | 1.23675700  | -2.17811500 |
| H | 1.37727900  | -0.88572400 | -1.15610600 |
| H | 0.71938500  | 2.49502600  | 0.45320000  |
| H | 2.31550900  | 2.37851500  | 1.21427300  |
| N | 1.59529500  | 0.54812500  | 0.39883500  |
| C | 3.47281800  | -0.59102200 | -0.81070700 |
| O | 4.27934400  | -0.39526600 | -1.69749800 |
| O | 3.78297500  | -1.30396600 | 0.25966200  |
| C | 0.98041500  | -0.17471400 | 1.42262300  |
| C | 0.97982100  | 0.55120400  | 2.74971400  |
| H | 0.47998400  | -0.05735400 | 3.51080600  |
| H | 2.01600000  | 0.70998300  | 3.06670500  |
| H | 0.47913400  | 1.52381700  | 2.70169700  |
| N | 1.42838800  | -1.51278500 | 1.48557000  |
| H | 2.97227500  | -1.44026900 | 0.84981500  |
| H | 1.25322300  | -1.90736000 | 2.40506700  |
| N | -0.70241800 | -0.33439600 | 1.05576200  |
| H | -0.70962800 | -1.23240900 | 0.48119300  |
| H | -1.20091600 | -0.52485600 | 1.92735000  |
| C | -2.78619500 | 0.37677300  | -0.06151400 |
| C | -3.03121900 | -0.73925300 | -0.86937600 |
| C | -3.86077000 | 1.14238700  | 0.39058900  |
| C | -4.33478600 | -1.08005400 | -1.21298100 |
| H | -2.19217000 | -1.34432000 | -1.21842000 |
| C | -5.16683200 | 0.80306400  | 0.04160700  |
| H | -3.67472200 | 2.01478000  | 1.01632600  |
| C | -5.40517600 | -0.30943100 | -0.75958000 |
| H | -4.51742400 | -1.94861700 | -1.84115800 |
| H | -5.99698100 | 1.40874200  | 0.39724400  |
| H | -6.42338300 | -0.57654600 | -1.03211100 |
| C | -1.37556100 | 0.74486500  | 0.30724700  |
| H | -1.36259700 | 1.66494400  | 0.90406300  |
| H | -0.76987500 | 0.91654600  | -0.59167000 |
| O | -0.00152600 | -2.44533900 | -0.32481800 |

|   |             |             |             |
|---|-------------|-------------|-------------|
| H | -0.26204300 | -3.36813500 | -0.37872600 |
| H | 0.86111600  | -2.14182600 | 0.65407100  |

#### TS6d-14

|   |             |             |             |
|---|-------------|-------------|-------------|
| C | -2.68473200 | 1.12798500  | 1.65683000  |
| C | -3.10030700 | 1.23346900  | 0.19428900  |
| C | -1.80794800 | 0.80477700  | -0.50562200 |
| C | -1.83000400 | -0.13747200 | 1.68968800  |
| H | -2.09895500 | 2.01114300  | 1.94655100  |
| H | -3.53246300 | 1.06301700  | 2.34568600  |
| H | -3.43646600 | 2.22859500  | -0.11120800 |
| H | -3.89604800 | 0.51413000  | -0.03843400 |
| H | -1.97740500 | 0.48219700  | -1.53971800 |
| H | -2.43965800 | -1.02290200 | 1.91012100  |
| H | -1.04085700 | -0.10683600 | 2.45076900  |
| N | -1.23865900 | -0.26439300 | 0.32684900  |
| C | -0.87612600 | 2.01657600  | -0.59051300 |
| O | -1.14651800 | 2.99085400  | -1.25646300 |
| O | 0.23656700  | 1.94564400  | 0.13686100  |
| C | -1.25600300 | -1.65196800 | -0.16289800 |
| C | -2.51411400 | -2.02146200 | -0.93862200 |
| H | -2.44201900 | -3.05651500 | -1.29221400 |
| H | -3.37493200 | -1.96634000 | -0.26111800 |
| H | -2.72026600 | -1.38027000 | -1.80331600 |
| N | -0.82731400 | -2.58270800 | 0.79813100  |
| H | 0.27234300  | 1.03924900  | 0.51906700  |
| H | -1.50212100 | -3.33896300 | 0.88794900  |
| N | 0.02127100  | -1.85999900 | -1.15731800 |
| H | 0.21438600  | -2.59775700 | -0.27168600 |
| H | -0.30250600 | -2.40741600 | -1.95494400 |
| C | 2.03885500  | -0.45731000 | -0.61207000 |
| C | 2.02222100  | -0.85203600 | 0.72692200  |
| C | 3.07224200  | 0.36963000  | -1.06410400 |
| C | 3.02320700  | -0.41327800 | 1.59556800  |
| H | 1.22396700  | -1.48994100 | 1.10830900  |
| C | 4.06444500  | 0.80751500  | -0.19659600 |
| H | 3.08678200  | 0.68595500  | -2.10724100 |
| C | 4.04157000  | 0.41739000  | 1.14190100  |
| H | 2.99768300  | -0.72640700 | 2.63685600  |
| H | 4.85520100  | 1.45740400  | -0.56370800 |
| H | 4.81447400  | 0.76101400  | 1.82518000  |
| C | 0.97503900  | -0.83379900 | -1.61096000 |
| H | 1.45905500  | -1.21461300 | -2.51935400 |
| H | 0.42226300  | 0.06287500  | -1.92723800 |

#### TS6d-15

|   |             |             |            |
|---|-------------|-------------|------------|
| C | -2.76024900 | -0.29980500 | 2.33753600 |
| C | -2.29332000 | -1.46186500 | 1.46794900 |
| C | -2.14399800 | -0.80948800 | 0.08412600 |
| C | -1.91878600 | 0.85140200  | 1.81574700 |
| H | -3.82869800 | -0.10211800 | 2.17414800 |
| H | -2.61331400 | -0.47599000 | 3.40706400 |
| H | -2.96772900 | -2.32315300 | 1.44784600 |

|   |             |             |             |
|---|-------------|-------------|-------------|
| H | -1.31187600 | -1.81669000 | 1.81059000  |
| H | -1.33310700 | -1.27948600 | -0.49287400 |
| H | -0.90688500 | 0.81551200  | 2.25084300  |
| H | -2.32266300 | 1.84559400  | 2.01970000  |
| N | -1.88870400 | 0.60788200  | 0.35937900  |
| C | -3.42103300 | -1.00766200 | -0.73028000 |
| O | -3.73367100 | -2.07746400 | -1.19919200 |
| O | -4.18242700 | 0.07950900  | -0.85465900 |
| C | -0.91320800 | 1.30581600  | -0.42139800 |
| C | -1.16890100 | 1.19756100  | -1.90591700 |
| H | -2.08752100 | 1.74716600  | -2.14049100 |
| H | -0.35538900 | 1.66059200  | -2.47121400 |
| H | -1.28744800 | 0.16705200  | -2.26098500 |
| N | -0.54372700 | 2.52940800  | 0.12735200  |
| H | -3.68195000 | 0.80773700  | -0.42026300 |
| H | -0.31849300 | 3.18335000  | -0.62037600 |
| N | 0.60468500  | 0.54548400  | -0.04894700 |
| H | 0.55828000  | 1.64753400  | 0.43770100  |
| H | 0.57142900  | -0.29140300 | 0.54048300  |
| C | 2.94070800  | -0.02247100 | -0.53542300 |
| C | 3.67334200  | 0.87030900  | 0.25240200  |
| C | 3.44770000  | -1.30264000 | -0.75961600 |
| C | 4.89014100  | 0.48817700  | 0.80561600  |
| H | 3.28024300  | 1.87171900  | 0.42997800  |
| C | 4.66787100  | -1.68826600 | -0.20747300 |
| H | 2.88340100  | -2.00128600 | -1.37674700 |
| C | 5.39016300  | -0.79385300 | 0.57699600  |
| H | 5.45352100  | 1.19169700  | 1.41409200  |
| H | 5.05429800  | -2.68785300 | -0.39217800 |
| H | 6.34285500  | -1.09224700 | 1.00785400  |
| C | 1.61222500  | 0.39110900  | -1.10359500 |
| H | 1.27488900  | -0.33954100 | -1.85361700 |
| H | 1.70321600  | 1.36609600  | -1.60524100 |

#### TS6d-16

|   |             |             |             |
|---|-------------|-------------|-------------|
| C | 3.71445800  | -0.40341700 | -1.46662600 |
| C | 2.70253900  | -1.54175300 | -1.47230200 |
| C | 1.73557100  | -1.10241200 | -0.36974600 |
| C | 2.83056600  | 0.82297300  | -1.30117700 |
| H | 4.39984100  | -0.50769000 | -0.61382200 |
| H | 4.32216100  | -0.35659300 | -2.37498200 |
| H | 3.12374000  | -2.53372500 | -1.28599300 |
| H | 2.16423900  | -1.56918100 | -2.42924900 |
| H | 0.73914200  | -1.54017100 | -0.52663500 |
| H | 2.42540600  | 1.14416100  | -2.27346700 |
| H | 3.34275400  | 1.68478900  | -0.86373300 |
| N | 1.73862700  | 0.36451900  | -0.40974400 |
| C | 2.22121300  | -1.60542800 | 0.99462600  |
| O | 2.27882800  | -2.78252800 | 1.26904200  |
| O | 2.57451200  | -0.65108300 | 1.85329000  |
| C | 0.48220100  | 1.09696800  | -0.56582600 |
| C | -0.38384900 | 0.60895000  | -1.71313800 |
| H | -1.26716900 | 1.24242900  | -1.83999500 |

|   |             |             |             |
|---|-------------|-------------|-------------|
| H | 0.20580200  | 0.67522900  | -2.63500800 |
| H | -0.72850500 | -0.42457300 | -1.59579500 |
| N | 0.73733200  | 2.44916300  | -0.54223200 |
| H | 2.42115300  | 0.20944000  | 1.38959200  |
| H | -0.01696600 | 2.98755000  | -0.95408800 |
| N | -0.27939600 | 0.69703000  | 0.86199000  |
| H | -0.25262900 | -0.30471600 | 1.05633400  |
| H | 0.35184300  | 1.22347700  | 1.54039600  |
| C | -2.71913400 | 0.30493300  | 0.48701400  |
| C | -2.78718800 | -1.03924300 | 0.86540700  |
| C | -3.66365500 | 0.79953800  | -0.41234900 |
| C | -3.76157600 | -1.87790700 | 0.33260600  |
| H | -2.08354500 | -1.44148000 | 1.59583900  |
| C | -4.64754600 | -0.03370400 | -0.93860700 |
| H | -3.62407500 | 1.84760800  | -0.70784000 |
| C | -4.69302000 | -1.37639800 | -0.57399000 |
| H | -3.79787500 | -2.92208500 | 0.63306600  |
| H | -5.37540600 | 0.36615800  | -1.64047900 |
| H | -5.45533000 | -2.03037400 | -0.98990100 |
| C | -1.65869900 | 1.20768300  | 1.05153400  |
| H | -1.79971100 | 1.35123900  | 2.13019100  |
| H | -1.69407300 | 2.20671700  | 0.59980000  |
| O | 1.13944500  | 2.60909000  | 1.88168200  |
| H | 1.05803200  | 2.72680400  | 0.60863800  |
| H | 1.99167100  | 2.82147900  | 2.27036200  |

#### TS6d-17

|   |             |             |             |
|---|-------------|-------------|-------------|
| C | -2.84835800 | 1.00771400  | 2.05041000  |
| C | -2.42126300 | -0.45513700 | 2.07457500  |
| C | -2.25671600 | -0.78272100 | 0.58379600  |
| C | -1.96058900 | 1.58322100  | 0.96141500  |
| H | -3.90854100 | 1.09472600  | 1.77563400  |
| H | -2.71007900 | 1.51126200  | 3.01132700  |
| H | -3.12257000 | -1.13285300 | 2.57010100  |
| H | -1.44719900 | -0.55321900 | 2.57286200  |
| H | -1.49808800 | -1.56422700 | 0.43509000  |
| H | -0.95637100 | 1.80464400  | 1.35507500  |
| H | -2.34240100 | 2.49958300  | 0.50116300  |
| N | -1.91417800 | 0.49767500  | -0.04144600 |
| C | -3.55902300 | -1.35293900 | 0.01924800  |
| O | -3.94634600 | -2.46673800 | 0.28425900  |
| O | -4.24978000 | -0.51953300 | -0.75872000 |
| C | -0.96537000 | 0.56613500  | -1.10614000 |
| C | -1.18312800 | -0.49950400 | -2.15705000 |
| H | -2.15352200 | -0.32963000 | -2.63509500 |
| H | -0.41606600 | -0.42912200 | -2.93342100 |
| H | -1.17064100 | -1.51906900 | -1.75674400 |
| N | -0.78126900 | 1.84541900  | -1.57806200 |
| H | -3.70162900 | 0.29384200  | -0.84036600 |
| H | -0.42921800 | 1.82895000  | -2.53023500 |
| N | 0.55214200  | 0.12021700  | -0.32189700 |
| H | 0.79206500  | 1.04123200  | 0.13971200  |
| H | 0.42942900  | -0.60458500 | 0.38739900  |

|   |             |             |             |
|---|-------------|-------------|-------------|
| C | 2.96649300  | -0.40141700 | -0.44726100 |
| C | 3.56747800  | 0.69952900  | 0.17334100  |
| C | 3.56273100  | -1.65887400 | -0.34202100 |
| C | 4.74902800  | 0.53428300  | 0.88777500  |
| H | 3.08577400  | 1.67665800  | 0.09634100  |
| C | 4.74803900  | -1.82168000 | 0.37247800  |
| H | 3.09959300  | -2.51659100 | -0.82968600 |
| C | 5.34196400  | -0.72437300 | 0.98904800  |
| H | 5.21368700  | 1.39316300  | 1.36680400  |
| H | 5.20604200  | -2.80529100 | 0.44601700  |
| H | 6.26763800  | -0.84770700 | 1.54637700  |
| C | 1.68231700  | -0.23026000 | -1.21046100 |
| H | 1.43888500  | -1.15172700 | -1.75171600 |
| H | 1.76408300  | 0.58746200  | -1.93806100 |
| O | 0.97599100  | 2.71123700  | -0.04584800 |
| H | 0.81348800  | 3.44935800  | 0.54735000  |
| H | -0.03177200 | 2.44636700  | -0.87853400 |

#### TS6b-18

|   |             |             |             |
|---|-------------|-------------|-------------|
| N | 0.42263500  | -0.75662300 | -0.73239000 |
| H | 0.94556600  | -1.03957000 | -1.56194700 |
| H | 0.14089500  | 0.24978500  | -0.79924000 |
| C | 2.59699800  | -0.27786300 | 0.33663400  |
| C | 3.76125600  | -1.04537500 | 0.35842000  |
| C | 2.69097000  | 1.10845200  | 0.16575100  |
| C | 5.00929100  | -0.44125700 | 0.21374700  |
| H | 3.69157200  | -2.12458100 | 0.49394000  |
| C | 3.93597700  | 1.70985300  | 0.01940500  |
| H | 1.78061100  | 1.70979500  | 0.14274300  |
| C | 5.09704700  | 0.93721200  | 0.04336500  |
| H | 5.91124500  | -1.04868700 | 0.23331200  |
| H | 4.00152900  | 2.78723000  | -0.11194100 |
| H | 6.06931700  | 1.41093100  | -0.07083600 |
| C | 1.24259100  | -0.91838100 | 0.47473800  |
| H | 0.68538500  | -0.44357900 | 1.29372700  |
| H | 1.34645100  | -1.98804400 | 0.70722300  |
| C | -2.81736700 | 0.39810600  | 2.07854900  |
| C | -3.67979300 | 0.80322100  | 0.88956500  |
| C | -2.76015700 | 0.52743900  | -0.30098900 |
| C | -2.17050900 | -0.89111000 | 1.59427400  |
| H | -2.04567300 | 1.15868900  | 2.25563800  |
| H | -3.37995400 | 0.25676100  | 3.00605700  |
| H | -4.00136000 | 1.84715400  | 0.90337500  |
| H | -4.57170500 | 0.16402900  | 0.83592600  |
| H | -3.34888100 | 0.30327100  | -1.19961200 |
| H | -2.81687200 | -1.76074400 | 1.79665800  |
| H | -1.19638800 | -1.07128300 | 2.06972300  |
| N | -2.04425500 | -0.68433500 | 0.14709200  |
| C | -1.88814100 | 1.77536000  | -0.62346800 |
| O | -2.54027400 | 2.75263800  | -1.02234200 |
| O | -0.63633500 | 1.69468100  | -0.45305500 |
| C | -1.33394700 | -1.51064200 | -0.65957300 |
| C | -1.62575800 | -1.44442700 | -2.13421200 |



|   |             |             |             |
|---|-------------|-------------|-------------|
| H | -1.49917700 | -0.43486200 | -2.53309400 |
| H | -0.96398000 | -2.12176100 | -2.68267700 |
| H | -2.65948100 | -1.76391600 | -2.30520200 |
| N | -1.16362400 | -2.80865700 | -0.19220300 |
| H | -0.55545800 | -3.38388500 | -0.76105100 |
| H | -0.97481600 | -2.92150600 | 0.79571800  |

**TS7-19**

|   |             |             |             |
|---|-------------|-------------|-------------|
| N | -0.43817700 | -0.65353700 | 0.09252700  |
| H | 0.67834700  | 1.19597400  | -0.33630300 |
| H | -0.44532100 | -0.97386500 | -0.87542700 |
| C | -2.86051100 | -0.35879200 | 0.21056700  |
| C | -2.85928900 | 1.03768500  | 0.13553500  |
| C | -3.99260200 | -1.05573200 | -0.21068600 |
| C | -3.97084600 | 1.72035000  | -0.34543700 |
| H | -1.97145400 | 1.58515600  | 0.45174000  |
| C | -5.10924700 | -0.37441400 | -0.69391300 |
| H | -3.99972200 | -2.14432100 | -0.16059900 |
| C | -5.10049000 | 1.01514700  | -0.76195800 |
| H | -3.95728600 | 2.80663600  | -0.39695300 |
| H | -5.98411500 | -0.93227100 | -1.02034100 |
| H | -5.96893900 | 1.54948300  | -1.14014000 |
| C | -1.66270900 | -1.08794600 | 0.75777300  |
| H | -1.83394200 | -2.17699300 | 0.68770200  |
| H | -1.55531400 | -0.85751700 | 1.82861100  |
| C | 3.68420800  | -0.99934000 | -1.63557100 |
| C | 3.79929300  | 0.42155700  | -1.10446100 |
| C | 2.88166500  | 0.40320400  | 0.12848800  |
| C | 2.20300900  | -1.29657500 | -1.44589500 |
| H | 4.01603400  | -1.10436100 | -2.67338500 |
| H | 4.28003600  | -1.68172800 | -1.01382400 |
| H | 3.40740900  | 1.13134100  | -1.84814700 |
| H | 4.81524000  | 0.73361500  | -0.84749500 |
| H | 3.44537600  | 0.12732400  | 1.03306100  |
| H | 2.01083100  | -2.37157500 | -1.34516400 |
| H | 1.62099500  | -0.94101200 | -2.31596600 |
| N | 1.86258900  | -0.56304200 | -0.22916100 |
| C | 2.34719300  | 1.80576000  | 0.36505900  |
| O | 3.02558100  | 2.68487900  | 0.84672800  |
| O | 1.09413400  | 2.04039800  | -0.04580400 |
| C | 0.85080900  | -1.02977300 | 0.71859800  |
| C | 0.97487600  | -2.52658800 | 1.00488200  |
| H | 1.98276500  | -2.75653000 | 1.37053000  |
| H | 0.24898400  | -2.83352400 | 1.76673700  |
| H | 0.77894800  | -3.12843300 | 0.11231300  |
| N | 1.01727100  | -0.31554300 | 1.96531500  |
| H | 0.45974200  | 0.53298100  | 2.00130700  |
| H | 0.80972400  | -0.88497600 | 2.77571000  |

**TS19-20**

|   |             |             |             |
|---|-------------|-------------|-------------|
| N | -0.66187700 | -0.17567400 | 0.19025600  |
| H | 1.75482400  | 1.60442200  | -0.85042300 |
| H | -0.68136600 | -0.47225400 | -0.78060700 |

|   |             |             |             |
|---|-------------|-------------|-------------|
| C | -3.10405900 | -0.18010300 | 0.28411100  |
| C | -3.28019500 | 1.18590900  | 0.04258100  |
| C | -4.14485400 | -1.05684500 | -0.02207300 |
| C | -4.47538600 | 1.66228000  | -0.48514200 |
| H | -2.46553700 | 1.87191400  | 0.26910900  |
| C | -5.34477100 | -0.58302300 | -0.55057400 |
| H | -4.01499100 | -2.12383800 | 0.15747500  |
| C | -5.51282600 | 0.77863000  | -0.78255900 |
| H | -4.60030000 | 2.72789100  | -0.66455200 |
| H | -6.14634900 | -1.28029200 | -0.78351300 |
| H | -6.44713700 | 1.15241400  | -1.19504000 |
| C | -1.82770200 | -0.69273300 | 0.89634500  |
| H | -1.86678000 | -1.79637100 | 0.93570600  |
| H | -1.77135300 | -0.35439000 | 1.94294800  |
| C | 2.97171000  | -1.98604100 | -1.18329000 |
| C | 3.90943000  | -0.85694600 | -0.79050000 |
| C | 3.03483200  | 0.02131000  | 0.12573800  |
| C | 1.65526700  | -1.24467100 | -1.35069700 |
| H | 3.28534900  | -2.50863800 | -2.09276300 |
| H | 2.89375500  | -2.72609900 | -0.37526500 |
| H | 4.20680300  | -0.28728100 | -1.68238600 |
| H | 4.82505200  | -1.17375300 | -0.28455500 |
| H | 3.20941600  | -0.24391600 | 1.17828100  |
| H | 0.77954500  | -1.89851500 | -1.28844800 |
| H | 1.61970000  | -0.74794700 | -2.33175400 |
| N | 1.63816500  | -0.21324400 | -0.28396100 |
| C | 3.42932900  | 1.48033900  | -0.06112600 |
| O | 4.49172700  | 1.92495000  | 0.30785300  |
| O | 2.52348400  | 2.21278800  | -0.70953100 |
| C | 0.65074500  | -0.41454900 | 0.79962600  |
| C | 0.78483900  | -1.79975900 | 1.44130700  |
| H | 1.79613400  | -1.92729500 | 1.84331900  |
| H | 0.09684500  | -1.89077400 | 2.28722800  |
| H | 0.57410900  | -2.61305900 | 0.73582300  |
| N | 0.85163800  | 0.57785000  | 1.86819300  |
| H | 1.56256100  | 1.26227300  | 1.63392600  |
| H | -0.00560600 | 1.11828600  | 1.95501200  |

#### TS20-21

|   |             |             |             |
|---|-------------|-------------|-------------|
| N | -0.68513600 | -0.31102300 | 0.04463600  |
| H | 2.79947000  | -0.29194800 | 1.62467200  |
| H | -0.85289300 | 0.33705100  | -0.72412600 |
| C | -3.10348700 | -0.51166300 | 0.08848500  |
| C | -3.38331600 | 0.44390600  | 1.07137300  |
| C | -4.05867100 | -0.76080300 | -0.89695000 |
| C | -4.59406200 | 1.12772300  | 1.07073500  |
| H | -2.63688600 | 0.64510200  | 1.83856200  |
| C | -5.27487800 | -0.07855900 | -0.90031700 |
| H | -3.84921200 | -1.50085800 | -1.66881200 |
| C | -5.54480300 | 0.86747300  | 0.08353400  |
| H | -4.79980300 | 1.86481400  | 1.84387100  |
| H | -6.01008100 | -0.28564900 | -1.67468300 |
| H | -6.49202400 | 1.40182500  | 0.08340600  |

|   |             |             |             |
|---|-------------|-------------|-------------|
| C | -1.79796100 | -1.25861900 | 0.10279800  |
| H | -1.79152100 | -1.99121000 | -0.72369300 |
| H | -1.70533100 | -1.83966900 | 1.02722500  |
| C | 1.84266400  | 2.44034400  | -0.70130400 |
| C | 3.21791600  | 1.79488900  | -0.76464100 |
| C | 2.90393100  | 0.29836500  | -0.53841100 |
| C | 1.20126400  | 1.65189600  | 0.42707000  |
| H | 1.88082300  | 3.51875800  | -0.51436700 |
| H | 1.29170700  | 2.27064300  | -1.63893700 |
| H | 3.84496000  | 2.17906700  | 0.05280600  |
| H | 3.76292900  | 1.95154000  | -1.69943000 |
| H | 2.86664700  | -0.20855300 | -1.50916200 |
| H | 0.11666700  | 1.73134200  | 0.49790100  |
| H | 1.60696700  | 1.99951400  | 1.39246900  |
| N | 1.62825000  | 0.25781100  | 0.18351600  |
| C | 4.03676400  | -0.33757900 | 0.25237100  |
| O | 5.11904600  | -0.59301700 | -0.22342200 |
| O | 3.75220500  | -0.53714000 | 1.54255300  |
| C | 0.65841300  | -0.86095400 | -0.09118700 |
| C | 0.87014000  | -1.47447600 | -1.47605900 |
| H | 1.82318700  | -2.00771300 | -1.57254800 |
| H | 0.07804700  | -2.20582500 | -1.66180000 |
| H | 0.82187300  | -0.70120600 | -2.25295000 |
| N | 0.77876900  | -1.93342400 | 0.87889900  |
| H | 1.67048200  | -2.41109800 | 0.78964800  |
| H | 0.70730800  | -1.55987200 | 1.82257100  |

#### TS21-22

|   |             |             |             |
|---|-------------|-------------|-------------|
| N | -0.50418300 | -0.31370000 | 0.13518000  |
| H | 3.55998600  | -0.41888300 | 1.09696400  |
| H | -0.31737900 | 0.02308600  | -0.80764300 |
| C | -2.93058400 | -0.53853200 | -0.11693900 |
| C | -3.25466200 | 0.57249500  | 0.66756300  |
| C | -3.85494900 | -0.99086200 | -1.05797400 |
| C | -4.48084800 | 1.21062700  | 0.51874300  |
| H | -2.52655000 | 0.93598700  | 1.39236600  |
| C | -5.08523900 | -0.35272300 | -1.21146200 |
| H | -3.60833600 | -1.85296400 | -1.67738100 |
| C | -5.40128700 | 0.74891000  | -0.42246000 |
| H | -4.72219700 | 2.07238800  | 1.13725600  |
| H | -5.79490200 | -0.71682500 | -1.95098800 |
| H | -6.35968100 | 1.24911100  | -0.54100200 |
| C | -1.61969500 | -1.25316600 | 0.08527800  |
| H | -1.50409800 | -2.03031300 | -0.69118200 |
| H | -1.65956300 | -1.79607400 | 1.04172000  |
| C | 1.55620900  | 2.51875500  | -0.17045400 |
| C | 2.74053400  | 1.87628500  | -0.87359900 |
| C | 2.44828500  | 0.37652000  | -0.71191500 |
| C | 1.38018400  | 1.62304000  | 1.04522100  |
| H | 1.72679200  | 3.56756800  | 0.09221300  |
| H | 0.66196400  | 2.47061500  | -0.80737300 |

|   |             |             |             |
|---|-------------|-------------|-------------|
| H | 3.67403000  | 2.13231900  | -0.35104800 |
| H | 2.86077900  | 2.15086400  | -1.92504300 |
| H | 1.83753400  | 0.02868400  | -1.56001700 |
| H | 0.35107600  | 1.61577700  | 1.41777900  |
| H | 2.04517200  | 1.94357300  | 1.86142800  |
| N | 1.77266200  | 0.26370000  | 0.58598200  |
| C | 3.76092700  | -0.38799900 | -0.74915900 |
| O | 4.33965700  | -0.65193200 | -1.77730800 |
| O | 4.26182600  | -0.67386800 | 0.45413900  |
| C | 0.75411300  | -0.78208800 | 0.74654600  |
| C | 1.23361400  | -2.10068400 | 0.14151200  |
| H | 2.18361400  | -2.41273400 | 0.58659900  |
| H | 0.50269200  | -2.87953600 | 0.38042200  |
| H | 1.33500600  | -2.05958300 | -0.95008400 |
| N | 0.57114000  | -0.99280900 | 2.18573600  |
| H | 0.99933200  | -0.23927500 | 2.71246400  |
| H | -0.41407800 | -1.00118300 | 2.43420600  |

### TS22-23

|   |             |             |             |
|---|-------------|-------------|-------------|
| N | -0.63356400 | -0.30977700 | 0.01823000  |
| H | 3.07742600  | -0.62983600 | 1.33070700  |
| H | -0.58680500 | 0.14487300  | -0.89318200 |
| C | -3.06532900 | -0.51083400 | -0.05310500 |
| C | -3.34009700 | 0.58221400  | 0.77441600  |
| C | -4.03664900 | -0.92629300 | -0.96361500 |
| C | -4.56265700 | 1.23994500  | 0.69619200  |
| H | -2.57701100 | 0.91504200  | 1.47696300  |
| C | -5.26374700 | -0.26921800 | -1.04563000 |
| H | -3.82911200 | -1.77382300 | -1.61640800 |
| C | -5.52942900 | 0.81524800  | -0.21572800 |
| H | -4.76485500 | 2.08744100  | 1.34749300  |
| H | -6.00996100 | -0.60453000 | -1.76241600 |
| H | -6.48474600 | 1.33110100  | -0.27918100 |
| C | -1.75134100 | -1.23901500 | 0.05827600  |
| H | -1.70890900 | -2.02131300 | -0.72208200 |
| H | -1.71599500 | -1.76257000 | 1.02580500  |
| C | 1.80191500  | 2.58197600  | -0.26249500 |
| C | 3.07120900  | 1.89522400  | -0.74737300 |
| C | 2.70096200  | 0.39523500  | -0.73559900 |
| C | 1.30618000  | 1.61667500  | 0.80243900  |
| H | 1.98171000  | 3.59369900  | 0.11528500  |
| H | 1.06371000  | 2.64365000  | -1.07478500 |
| H | 3.88625000  | 2.07977200  | -0.03281600 |
| H | 3.42040400  | 2.21560500  | -1.73256800 |
| H | 2.41671900  | 0.06545200  | -1.74717300 |
| H | 0.23184000  | 1.69556100  | 0.99890500  |
| H | 1.84257600  | 1.78063000  | 1.75501900  |
| N | 1.62500600  | 0.30729500  | 0.22963400  |
| C | 3.93768200  | -0.39867400 | -0.33427000 |
| O | 4.86366800  | -0.59221800 | -1.08913100 |
| O | 3.95884200  | -0.81693700 | 0.93441900  |
| C | 0.70795500  | -0.81108400 | 0.36536900  |

|   |            |             |             |
|---|------------|-------------|-------------|
| C | 1.12673700 | -1.98530200 | -0.51406200 |
| H | 2.13450100 | -2.34487500 | -0.28354700 |
| H | 0.44183000 | -2.82391500 | -0.34823400 |
| H | 1.07117000 | -1.72055500 | -1.57532700 |
| N | 0.76585000 | -1.25376100 | 1.75917300  |
| H | 0.30309400 | -0.57243900 | 2.35844600  |
| H | 0.30470000 | -2.14860500 | 1.89863900  |

**TS23-24**

|   |             |             |             |
|---|-------------|-------------|-------------|
| N | -0.67444600 | -0.15707100 | -0.33303300 |
| H | 1.74701500  | -0.98275300 | 1.79017000  |
| H | -0.83427100 | 0.68271500  | -0.87498300 |
| C | -3.08428700 | -0.45879300 | -0.16506300 |
| C | -3.26807400 | 0.42455200  | 0.90282400  |
| C | -4.16207800 | -0.73623000 | -1.00544200 |
| C | -4.50665800 | 1.01637900  | 1.12530500  |
| H | -2.42795700 | 0.65004100  | 1.55893900  |
| C | -5.40567700 | -0.14830700 | -0.78238000 |
| H | -4.02603300 | -1.41858700 | -1.84363900 |
| C | -5.58020500 | 0.72985400  | 0.28293500  |
| H | -4.63668700 | 1.70221800  | 1.95917300  |
| H | -6.23670900 | -0.37335100 | -1.44654900 |
| H | -6.54879900 | 1.19266500  | 0.45593200  |
| C | -1.75290000 | -1.12589800 | -0.38643500 |
| H | -1.77673700 | -1.68751500 | -1.33543900 |
| H | -1.58138400 | -1.86606000 | 0.41006400  |
| C | 2.36487000  | 2.63416800  | -0.55395700 |
| C | 3.56739800  | 1.70092800  | -0.49676900 |
| C | 2.98678700  | 0.28499200  | -0.64910300 |
| C | 1.29091000  | 1.82802300  | 0.15359000  |
| H | 2.54649300  | 3.60173900  | -0.07609100 |
| H | 2.05987700  | 2.81769700  | -1.59278900 |
| H | 4.05001800  | 1.78641700  | 0.48597500  |
| H | 4.32509500  | 1.90588200  | -1.25759100 |
| H | 3.07782600  | -0.06968400 | -1.68467500 |
| H | 0.27752900  | 2.16846700  | -0.07782200 |
| H | 1.42007000  | 1.86819200  | 1.24876000  |
| N | 1.55047500  | 0.46931600  | -0.33201300 |
| C | 3.78654000  | -0.67125200 | 0.27086700  |
| O | 4.76379200  | -1.21323600 | -0.27139400 |
| O | 3.41213500  | -0.75382200 | 1.47557300  |
| C | 0.66107700  | -0.54625400 | -0.24674100 |
| C | 1.06824100  | -1.84141600 | -0.89551500 |
| H | 2.04241100  | -2.19583100 | -0.55025100 |
| H | 0.33259700  | -2.62540400 | -0.70554600 |
| H | 1.12244700  | -1.67946300 | -1.97953400 |
| N | 0.72897500  | -1.12732800 | 1.60350400  |
| H | 0.16127900  | -0.49462300 | 2.16228800  |
| H | 0.46780300  | -2.08518800 | 1.82627600  |

**TS8-25**

|   |            |             |             |
|---|------------|-------------|-------------|
| C | 3.92143200 | -0.25532400 | -1.03772900 |
| C | 2.82144200 | -1.19603100 | -1.51371300 |

|   |             |             |             |
|---|-------------|-------------|-------------|
| C | 1.65483600  | -0.86116400 | -0.59385100 |
| C | 3.16869500  | 1.02728700  | -0.70025400 |
| H | 4.38874700  | -0.66942500 | -0.13633600 |
| H | 4.70695200  | -0.09731000 | -1.78320200 |
| H | 3.10027500  | -2.25176900 | -1.46409700 |
| H | 2.53101100  | -0.95901700 | -2.54532500 |
| H | 0.69443800  | -1.09485800 | -1.08163300 |
| H | 3.18633300  | 1.74223000  | -1.53782400 |
| H | 3.60984800  | 1.53720600  | 0.16902000  |
| N | 1.78779700  | 0.59215000  | -0.43791400 |
| C | 1.68632900  | -1.68006700 | 0.70926900  |
| O | 2.63663700  | -2.33754000 | 1.07438300  |
| O | 0.55815500  | -1.65022300 | 1.42083300  |
| C | 1.00529000  | 1.35832700  | 0.50579900  |
| C | 1.00929000  | 2.82823800  | 0.08682400  |
| H | 0.32304200  | 3.38890100  | 0.73311100  |
| H | 2.00527900  | 3.25780300  | 0.22655000  |
| H | 0.71474800  | 2.95949500  | -0.96033100 |
| N | 1.53145700  | 1.28930900  | 1.88536700  |
| H | 2.30739900  | 0.63631000  | 1.94640500  |
| H | 0.83533700  | 0.97476700  | 2.55430200  |
| N | -0.36222400 | 0.78894300  | 0.52280900  |
| H | -0.01393700 | -0.90581000 | 1.08494900  |
| H | -0.86685600 | 1.22173300  | 1.29749400  |
| C | -2.51539900 | 0.33060100  | -0.49894900 |
| C | -2.66407200 | -1.05550800 | -0.60150300 |
| C | -3.62666100 | 1.10419600  | -0.16111500 |
| C | -3.89633300 | -1.65521500 | -0.36544400 |
| H | -1.80630600 | -1.67049200 | -0.87408900 |
| C | -4.86369200 | 0.50792900  | 0.07539000  |
| H | -3.52070700 | 2.18651700  | -0.08732300 |
| C | -4.99935800 | -0.87372300 | -0.02446500 |
| H | -3.99784400 | -2.73457900 | -0.44921300 |
| H | -5.72160400 | 1.12335500  | 0.33590300  |
| H | -5.96347300 | -1.34230600 | 0.15831000  |
| C | -1.17311900 | 0.97693800  | -0.69249000 |
| H | -1.31007800 | 2.04269100  | -0.93303000 |
| H | -0.63223000 | 0.52494700  | -1.53383200 |

#### TS25-26

|   |            |             |             |
|---|------------|-------------|-------------|
| C | 3.55213400 | -0.23184600 | -1.59580000 |
| C | 2.29156600 | -1.05898300 | -1.83953900 |
| C | 1.47124900 | -0.82059900 | -0.58123600 |
| C | 3.06688200 | 0.97246000  | -0.77909900 |
| H | 4.27598600 | -0.81931800 | -1.01971800 |
| H | 4.04248400 | 0.07376000  | -2.52515800 |
| H | 2.50054600 | -2.11783700 | -2.00837100 |
| H | 1.72941200 | -0.66808500 | -2.69686100 |
| H | 0.39765300 | -0.97828300 | -0.76058400 |
| H | 3.02479400 | 1.88832000  | -1.38647500 |
| H | 3.75435700 | 1.17889200  | 0.06081800  |
| N | 1.72649000 | 0.59754600  | -0.33198400 |
| C | 1.85147200 | -1.79828400 | 0.54338900  |

|   |             |             |             |
|---|-------------|-------------|-------------|
| O | 2.65875500  | -2.69246800 | 0.41471500  |
| O | 1.18195000  | -1.65931000 | 1.69002000  |
| C | 1.03957000  | 1.39150300  | 0.65892900  |
| C | 1.09635500  | 2.86964600  | 0.26282300  |
| H | 0.47033900  | 3.45408200  | 0.94943200  |
| H | 2.11888700  | 3.25622300  | 0.33151100  |
| H | 0.73548400  | 3.03060100  | -0.75936900 |
| N | 1.60255100  | 1.18999900  | 2.00683400  |
| H | 1.41650500  | 1.98933400  | 2.60850300  |
| H | 2.61184900  | 1.08347200  | 1.95778300  |
| N | -0.32948400 | 0.87693600  | 0.76433200  |
| H | 0.68865200  | -0.81052200 | 1.70390400  |
| H | -0.73519900 | 1.20561200  | 1.63850600  |
| C | -2.52248100 | 0.40306100  | -0.24658100 |
| C | -2.57767500 | -0.88843500 | 0.28452900  |
| C | -3.70087800 | 0.98035600  | -0.72572400 |
| C | -3.78081100 | -1.58788000 | 0.32523200  |
| H | -1.67117800 | -1.34500000 | 0.67693000  |
| C | -4.90480000 | 0.28215700  | -0.68954500 |
| H | -3.67331000 | 1.99217700  | -1.12990800 |
| C | -4.94834200 | -1.00697900 | -0.16412700 |
| H | -3.80492800 | -2.59217100 | 0.74217000  |
| H | -5.81223400 | 0.74893400  | -1.06628300 |
| H | -5.88779500 | -1.55370300 | -0.13132500 |
| C | -1.22599800 | 1.16421800  | -0.34887500 |
| H | -1.45421900 | 2.24009300  | -0.44864000 |
| H | -0.70008600 | 0.88390100  | -1.27528100 |

#### TS26-27

|   |             |             |             |
|---|-------------|-------------|-------------|
| C | 3.60364100  | -0.66788500 | -1.33973900 |
| C | 2.30741000  | -1.38821200 | -1.69339300 |
| C | 1.32803600  | -0.90101000 | -0.62621600 |
| C | 3.13607300  | 0.71843900  | -0.90976200 |
| H | 4.08944200  | -1.17139500 | -0.49707500 |
| H | 4.31380700  | -0.62071300 | -2.17064100 |
| H | 2.39560400  | -2.47850600 | -1.68573100 |
| H | 1.95689000  | -1.08265600 | -2.68896800 |
| H | 0.29778600  | -0.94145700 | -0.98963200 |
| H | 3.14635400  | 1.43698100  | -1.74200600 |
| H | 3.74943100  | 1.12742000  | -0.09575900 |
| N | 1.75403400  | 0.50642600  | -0.44954600 |
| C | 1.40957700  | -1.77917400 | 0.65019000  |
| O | 0.66184100  | -2.77148300 | 0.63180800  |
| O | 2.24254600  | -1.43675600 | 1.53579900  |
| C | 1.10032700  | 1.40604000  | 0.28867600  |
| C | 1.48841600  | 2.85079700  | 0.13740800  |
| H | 0.95416300  | 3.45941900  | 0.87229900  |
| H | 2.56150300  | 3.02501300  | 0.24998300  |
| H | 1.19349100  | 3.18277700  | -0.86790000 |
| N | 1.73186600  | 1.16834200  | 2.17842800  |
| H | 2.00946200  | 0.16446500  | 2.11547500  |
| H | 2.53806000  | 1.73430900  | 2.43104500  |
| N | -0.25533300 | 1.09732700  | 0.53211100  |

|   |             |             |             |
|---|-------------|-------------|-------------|
| H | 1.02820200  | 1.27600300  | 2.90474500  |
| H | -0.61268100 | 1.65269200  | 1.30375500  |
| C | -2.46010400 | 0.49696700  | -0.35339500 |
| C | -2.46514700 | -0.80461700 | 0.16004700  |
| C | -3.67401000 | 1.12036000  | -0.64368200 |
| C | -3.67122500 | -1.46590500 | 0.36907100  |
| H | -1.52524300 | -1.30381100 | 0.40060500  |
| C | -4.88148400 | 0.45680400  | -0.43452600 |
| H | -3.67430500 | 2.13742000  | -1.03566100 |
| C | -4.88121900 | -0.83878700 | 0.07340400  |
| H | -3.66355600 | -2.47868300 | 0.76472800  |
| H | -5.82073900 | 0.95561900  | -0.66278400 |
| H | -5.82136500 | -1.35925400 | 0.24134300  |
| C | -1.16318900 | 1.21295400  | -0.61910500 |
| H | -1.36695600 | 2.26686900  | -0.87651100 |
| H | -0.66103600 | 0.77810600  | -1.49299200 |

#### TS12-28

|   |             |             |             |
|---|-------------|-------------|-------------|
| C | 0.68016800  | 1.24484600  | 0.53584900  |
| N | 0.99311000  | 2.10227400  | -0.60814600 |
| H | 1.89314000  | 2.56169800  | -0.49078600 |
| N | -0.74635700 | 1.00060300  | 0.49064700  |
| H | -1.06269800 | 0.55671800  | 1.34892700  |
| C | -2.71677600 | -0.05475100 | -0.45260100 |
| C | -3.12635000 | -1.38440500 | -0.34580500 |
| C | -3.67359800 | 0.95735300  | -0.32680600 |
| C | -4.46654300 | -1.70112800 | -0.12557100 |
| H | -2.38740200 | -2.17967300 | -0.44443100 |
| C | -5.01027900 | 0.64632900  | -0.10540900 |
| H | -3.35783000 | 1.99695500  | -0.40408700 |
| C | -5.41076300 | -0.68633200 | -0.00510200 |
| H | -4.77091400 | -2.74258400 | -0.04996200 |
| H | -5.74499600 | 1.44314400  | -0.01373200 |
| H | -6.45662900 | -0.93070900 | 0.16569400  |
| C | -1.27351800 | 0.29562800  | -0.67918000 |
| H | -1.18084500 | 0.95694900  | -1.55143400 |
| H | -0.70381000 | -0.61919700 | -0.91835000 |
| H | 0.29304300  | 2.83946900  | -0.64932000 |
| C | 0.99988600  | 1.91178300  | 1.87376800  |
| H | 0.44580800  | 2.85230800  | 1.96051400  |
| H | 0.72754000  | 1.27678900  | 2.72585600  |
| H | 2.07111200  | 2.13435100  | 1.95109500  |
| N | 1.43664600  | -0.00843100 | 0.33745600  |
| C | 2.33628700  | -2.00915600 | 1.19333700  |
| C | 3.45155100  | -0.97276500 | 1.16814800  |
| C | 2.89588300  | 0.06162900  | 0.19085300  |
| C | 1.09577000  | -1.13144200 | 1.21778400  |
| H | 2.35817400  | -2.61222200 | 0.27440800  |
| H | 2.38689800  | -2.69183900 | 2.04665700  |
| H | 4.42678600  | -1.35353400 | 0.85426000  |
| H | 3.55891000  | -0.51223000 | 2.15998300  |
| H | 3.29522400  | 1.06207400  | 0.42153000  |
| H | 0.89851000  | -0.79624000 | 2.25249200  |



|   |            |             |             |
|---|------------|-------------|-------------|
| H | 0.19533500 | -1.65277200 | 0.86454200  |
| C | 3.33957700 | -0.23073600 | -1.24797800 |
| O | 4.47856300 | -0.53408000 | -1.52673100 |
| O | 2.39993900 | -0.10594200 | -2.18046500 |
| H | 1.57506100 | 0.18847900  | -1.73373000 |

**TS28-29**

|   |             |             |             |
|---|-------------|-------------|-------------|
| C | 0.64976300  | 1.26244200  | 0.36952600  |
| N | 0.87500900  | 2.03714400  | -0.83777800 |
| H | 1.62235500  | 1.70473200  | -1.43185700 |
| N | -0.76329400 | 0.93457800  | 0.44261600  |
| H | -1.00768100 | 0.50986700  | 1.33380800  |
| C | -2.77492900 | -0.10221300 | -0.43000300 |
| C | -3.22981000 | -1.40478300 | -0.22295600 |
| C | -3.69688700 | 0.94854300  | -0.38770400 |
| C | -4.58030700 | -1.65926000 | 0.01416200  |
| H | -2.51682800 | -2.22922500 | -0.25371600 |
| C | -5.04390500 | 0.69987500  | -0.15128400 |
| H | -3.34226800 | 1.96670600  | -0.54159300 |
| C | -5.48989800 | -0.60694700 | 0.04989200  |
| H | -4.92027800 | -2.68065000 | 0.17038500  |
| H | -5.75150600 | 1.52566300  | -0.12637100 |
| H | -6.54406300 | -0.80227600 | 0.23292500  |
| C | -1.31903400 | 0.17826700  | -0.67149200 |
| H | -1.18190900 | 0.78838200  | -1.57391700 |
| H | -0.79553800 | -0.77994300 | -0.85234900 |
| H | 0.99960200  | 3.02476100  | -0.65269400 |
| C | 0.98911200  | 2.07663600  | 1.61726500  |
| H | 0.40278200  | 3.00171200  | 1.61526800  |
| H | 0.74495000  | 1.53601600  | 2.53892300  |
| H | 2.05290300  | 2.33821700  | 1.64215000  |
| N | 1.46146300  | 0.01551200  | 0.27117600  |
| C | 2.45598400  | -1.80724500 | 1.40894400  |
| C | 3.50569900  | -0.71039400 | 1.28528200  |
| C | 2.92511500  | 0.15246700  | 0.16325900  |
| C | 1.16266100  | -1.01811100 | 1.28082200  |
| H | 2.55404800  | -2.52489900 | 0.58231800  |
| H | 2.51322300  | -2.36746400 | 2.34669300  |
| H | 4.51552700  | -1.06356600 | 1.05780900  |
| H | 3.54772400  | -0.12052300 | 2.21087300  |
| H | 3.25430700  | 1.19715500  | 0.24239500  |
| H | 0.91310900  | -0.56687800 | 2.25643700  |
| H | 0.30710500  | -1.63383600 | 0.97233400  |
| C | 3.41327300  | -0.34480100 | -1.20021900 |
| O | 4.57774700  | -0.32678000 | -1.52609400 |
| O | 2.44748000  | -0.80072900 | -1.99762000 |
| H | 1.61734300  | -0.70139300 | -1.46516800 |

**TS29-30**

|   |             |             |             |
|---|-------------|-------------|-------------|
| C | 0.69881700  | -1.17686200 | -0.10958400 |
| N | 0.87911300  | -2.01544200 | 1.06256900  |
| H | 0.72504000  | -1.49345000 | 1.92173500  |
| N | -0.72080600 | -0.94625100 | -0.27315100 |

|   |             |             |             |
|---|-------------|-------------|-------------|
| H | -0.91057100 | -0.27716800 | -1.01183100 |
| C | -2.91833100 | -0.23350000 | 0.44422300  |
| C | -3.34733000 | 1.05702400  | 0.75587800  |
| C | -3.75344700 | -1.05933100 | -0.31493000 |
| C | -4.59197500 | 1.51538900  | 0.32641100  |
| H | -2.70176500 | 1.70676800  | 1.34711800  |
| C | -4.99441900 | -0.60470200 | -0.74737900 |
| H | -3.41835300 | -2.06572400 | -0.56223100 |
| C | -5.41693100 | 0.68533500  | -0.42646000 |
| H | -4.91561600 | 2.52217900  | 0.58056900  |
| H | -5.63685900 | -1.25801600 | -1.33345200 |
| H | -6.38829800 | 1.04068300  | -0.76248400 |
| C | -1.57111700 | -0.72757100 | 0.89036100  |
| H | -1.67661300 | -1.68310100 | 1.42284300  |
| H | -1.15751900 | -0.00297400 | 1.61662100  |
| H | 1.82441600  | -2.38629700 | 1.09339100  |
| C | 1.16781000  | -1.97813300 | -1.31775700 |
| H | 0.57661700  | -2.89595200 | -1.35287200 |
| H | 0.99920400  | -1.41989300 | -2.24630500 |
| H | 2.22830700  | -2.25148300 | -1.26085900 |
| N | 1.46589300  | 0.13187500  | 0.01781100  |
| C | 1.84491500  | 2.44494000  | 0.04515000  |
| C | 2.77037100  | 1.85521600  | -1.00956500 |
| C | 2.72410600  | 0.34549400  | -0.71352500 |
| C | 0.74050300  | 1.40704100  | 0.10561200  |
| H | 2.35525900  | 2.51668400  | 1.01550700  |
| H | 1.47337000  | 3.44093000  | -0.21456700 |
| H | 3.79128600  | 2.24884200  | -0.99386400 |
| H | 2.35936000  | 2.03471900  | -2.01083200 |
| H | 2.79683200  | -0.21638700 | -1.65118300 |
| H | 0.04155500  | 1.55959000  | -0.73736400 |
| H | 0.15580800  | 1.46948400  | 1.03177300  |
| C | 3.93377200  | -0.06432700 | 0.12344800  |
| O | 5.04778800  | -0.17525200 | -0.33412200 |
| O | 3.66486200  | -0.25619200 | 1.41721800  |
| H | 2.68748000  | -0.12523200 | 1.48162200  |

### TS30-31

|   |             |             |             |
|---|-------------|-------------|-------------|
| C | -0.84271100 | 1.41546100  | 0.21569600  |
| N | -0.94644300 | 2.30666200  | 1.36024300  |
| H | -0.05530400 | 2.61125800  | 1.72921600  |
| N | 0.55825900  | 1.19191800  | -0.12085300 |
| H | 0.66786700  | 0.51256200  | -0.86633900 |
| C | 2.79344900  | 0.36041000  | 0.29829200  |
| C | 3.11886900  | -0.91823600 | 0.75351500  |
| C | 3.55123000  | 0.92500100  | -0.73192500 |
| C | 4.18404300  | -1.62143600 | 0.19330300  |
| H | 2.53774900  | -1.36323000 | 1.56111600  |
| C | 4.61329600  | 0.22502900  | -1.29511300 |
| H | 3.29924200  | 1.92335200  | -1.08814800 |
| C | 4.93213900  | -1.05126200 | -0.83260700 |
| H | 4.42979600  | -2.61507500 | 0.56089600  |
| H | 5.19709900  | 0.67713100  | -2.09355200 |

|   |             |             |             |
|---|-------------|-------------|-------------|
| H | 5.76419000  | -1.59761100 | -1.27036300 |
| C | 1.62631200  | 1.11252300  | 0.87357100  |
| H | 1.95739300  | 2.13213300  | 1.13513900  |
| H | 1.31998400  | 0.63329600  | 1.81627300  |
| H | -1.51375900 | 1.92312700  | 2.10443100  |
| C | -1.48596000 | 2.10458100  | -0.98944100 |
| H | -1.00078200 | 3.07683200  | -1.10384500 |
| H | -1.35615700 | 1.55016900  | -1.92625700 |
| H | -2.55402200 | 2.27524900  | -0.81710000 |
| N | -1.61795200 | 0.17933500  | 0.53501800  |
| C | -1.85136300 | -1.98245600 | 1.41887800  |
| C | -1.79498800 | -2.13399800 | -0.09459700 |
| C | -1.99267700 | -0.69162900 | -0.59636500 |
| C | -1.08933300 | -0.68577900 | 1.60458300  |
| H | -2.88800500 | -1.87667700 | 1.76655800  |
| H | -1.39671600 | -2.82112100 | 1.95476400  |
| H | -2.53093600 | -2.82374400 | -0.51843700 |
| H | -0.79805100 | -2.48276400 | -0.39453100 |
| H | -1.39106900 | -0.52281900 | -1.49923200 |
| H | -0.01405100 | -0.88468300 | 1.46182900  |
| H | -1.22469400 | -0.22857200 | 2.59185200  |
| C | -3.44990700 | -0.47840900 | -0.99779500 |
| O | -3.92234500 | -0.93859900 | -2.01174000 |
| O | -4.17255700 | 0.21071700  | -0.11509800 |
| H | -3.52198700 | 0.50004400  | 0.56961200  |

### TS31-32

|   |             |             |             |
|---|-------------|-------------|-------------|
| C | 0.74331600  | -1.17612700 | 0.20121800  |
| N | 0.93174800  | -1.86313500 | 1.47247700  |
| H | 0.39412200  | -2.72649000 | 1.49443200  |
| N | -0.67742400 | -0.95516700 | -0.10214500 |
| H | -0.78294500 | -0.30486300 | -0.87774600 |
| C | -2.93320700 | -0.20461000 | 0.36734300  |
| C | -3.40178800 | 1.08933900  | 0.59841400  |
| C | -3.68398600 | -1.05934400 | -0.44611600 |
| C | -4.60020800 | 1.52420700  | 0.03409400  |
| H | -2.82270600 | 1.76140400  | 1.23188600  |
| C | -4.87856000 | -0.62864300 | -1.01221700 |
| H | -3.32025100 | -2.06907500 | -0.63150700 |
| C | -5.34030900 | 0.66596300  | -0.77313500 |
| H | -4.95422500 | 2.53447500  | 0.22630600  |
| H | -5.45580100 | -1.30443000 | -1.63921200 |
| H | -6.27610800 | 1.00193900  | -1.21361100 |
| C | -1.63403400 | -0.67165500 | 0.96305100  |
| H | -1.80653200 | -1.59663100 | 1.53434700  |
| H | -1.29298300 | 0.08556800  | 1.69098600  |
| H | 0.62728000  | -1.29181600 | 2.25636300  |
| C | 1.27856700  | -2.09425600 | -0.89084100 |
| H | 0.77846900  | -3.06202600 | -0.79005700 |
| H | 1.04152200  | -1.71003400 | -1.88860400 |
| H | 2.35768000  | -2.25730000 | -0.80645000 |
| N | 1.52964500  | 0.07201100  | 0.28388700  |
| C | 1.96801400  | 2.33471500  | 0.68630800  |

|   |             |             |             |
|---|-------------|-------------|-------------|
| C | 2.40053800  | 2.03268600  | -0.74290300 |
| C | 2.44484200  | 0.49801200  | -0.77606500 |
| C | 0.93950200  | 1.24557400  | 0.93076100  |
| H | 2.81175800  | 2.22556100  | 1.38121300  |
| H | 1.55568800  | 3.34065300  | 0.80999600  |
| H | 3.35622800  | 2.47699200  | -1.03545000 |
| H | 1.63602500  | 2.38585300  | -1.44634500 |
| H | 2.16969100  | 0.13546300  | -1.77532100 |
| H | -0.02273200 | 1.53039800  | 0.46489000  |
| H | 0.75449400  | 1.06517300  | 1.99860100  |
| C | 3.86916300  | -0.00207900 | -0.52042200 |
| O | 4.77118100  | 0.17848400  | -1.30735900 |
| O | 4.04973400  | -0.63419700 | 0.63805100  |
| H | 3.16512600  | -0.67376300 | 1.07328200  |

### TS31-32

|   |             |             |             |
|---|-------------|-------------|-------------|
| C | 0.74331600  | -1.17612700 | 0.20121800  |
| N | 0.93174800  | -1.86313500 | 1.47247700  |
| H | 0.39412200  | -2.72649000 | 1.49443200  |
| N | -0.67742400 | -0.95516700 | -0.10214500 |
| H | -0.78294500 | -0.30486300 | -0.87774600 |
| C | -2.93320700 | -0.20461000 | 0.36734300  |
| C | -3.40178800 | 1.08933900  | 0.59841400  |
| C | -3.68398600 | -1.05934400 | -0.44611600 |
| C | -4.60020800 | 1.52420700  | 0.03409400  |
| H | -2.82270600 | 1.76140400  | 1.23188600  |
| C | -4.87856000 | -0.62864300 | -1.01221700 |
| H | -3.32025100 | -2.06907500 | -0.63150700 |
| C | -5.34030900 | 0.66596300  | -0.77313500 |
| H | -4.95422500 | 2.53447500  | 0.22630600  |
| H | -5.45580100 | -1.30443000 | -1.63921200 |
| H | -6.27610800 | 1.00193900  | -1.21361100 |
| C | -1.63403400 | -0.67165500 | 0.96305100  |
| H | -1.80653200 | -1.59663100 | 1.53434700  |
| H | -1.29298300 | 0.08556800  | 1.69098600  |
| H | 0.62728000  | -1.29181600 | 2.25636300  |
| C | 1.27856700  | -2.09425600 | -0.89084100 |
| H | 0.77846900  | -3.06202600 | -0.79005700 |
| H | 1.04152200  | -1.71003400 | -1.88860400 |
| H | 2.35768000  | -2.25730000 | -0.80645000 |
| N | 1.52964500  | 0.07201100  | 0.28388700  |
| C | 1.96801400  | 2.33471500  | 0.68630800  |
| C | 2.40053800  | 2.03268600  | -0.74290300 |
| C | 2.44484200  | 0.49801200  | -0.77606500 |
| C | 0.93950200  | 1.24557400  | 0.93076100  |
| H | 2.81175800  | 2.22556100  | 1.38121300  |
| H | 1.55568800  | 3.34065300  | 0.80999600  |
| H | 3.35622800  | 2.47699200  | -1.03545000 |
| H | 1.63602500  | 2.38585300  | -1.44634500 |
| H | 2.16969100  | 0.13546300  | -1.77532100 |
| H | -0.02273200 | 1.53039800  | 0.46489000  |
| H | 0.75449400  | 1.06517300  | 1.99860100  |
| C | 3.86916300  | -0.00207900 | -0.52042200 |

|   |            |             |             |
|---|------------|-------------|-------------|
| O | 4.77118100 | 0.17848400  | -1.30735900 |
| O | 4.04973400 | -0.63419700 | 0.63805100  |
| H | 3.16512600 | -0.67376300 | 1.07328200  |

**TS32-33**

|   |             |             |             |
|---|-------------|-------------|-------------|
| C | -0.61579400 | -0.55633100 | 0.34967900  |
| N | -0.89186200 | -1.68958800 | -1.06932900 |
| H | -0.65182600 | -2.66742100 | -0.91802500 |
| N | 0.72505700  | -0.16719700 | 0.27625800  |
| H | 0.90423100  | 0.57080500  | -0.39609700 |
| C | 3.12901400  | -0.46589000 | 0.15361900  |
| C | 3.91540500  | -0.68681500 | -0.97648200 |
| C | 3.58642500  | 0.41434200  | 1.13890500  |
| C | 5.14397100  | -0.04397700 | -1.12209500 |
| H | 3.56601300  | -1.37352900 | -1.74691500 |
| C | 4.80999900  | 1.05863400  | 0.99548600  |
| H | 2.97335800  | 0.59024100  | 2.02183900  |
| C | 5.59210500  | 0.82986700  | -0.13651700 |
| H | 5.74947200  | -0.22797800 | -2.00626500 |
| H | 5.15813600  | 1.73860200  | 1.76939000  |
| H | 6.55047200  | 1.33141900  | -0.24729900 |
| C | 1.80062200  | -1.15087700 | 0.31647600  |
| H | 1.77152400  | -1.66685800 | 1.28522500  |
| H | 1.68894900  | -1.92320800 | -0.46547800 |
| H | -0.40747300 | -1.36644900 | -1.90434600 |
| C | -0.94434500 | -1.49104400 | 1.48511200  |
| H | -0.25976400 | -2.34181400 | 1.51284000  |
| H | -0.85759900 | -0.94329600 | 2.42964700  |
| H | -1.96164000 | -1.87946400 | 1.39271400  |
| N | -1.50311800 | 0.46677200  | 0.16012900  |
| C | -2.61956000 | 2.20770600  | -0.96662400 |
| C | -3.28758000 | 1.93666200  | 0.37668500  |
| C | -2.88954800 | 0.48902300  | 0.66144500  |
| C | -1.25994700 | 1.53395500  | -0.81487100 |
| H | -3.18824400 | 1.72392100  | -1.77005200 |
| H | -2.52936600 | 3.27142300  | -1.20598900 |
| H | -4.37368300 | 2.05506500  | 0.36506800  |
| H | -2.87177300 | 2.59804500  | 1.14885300  |
| H | -2.90440300 | 0.28865600  | 1.74011500  |
| H | -0.50829800 | 2.24331200  | -0.43198600 |
| H | -0.89203000 | 1.13262300  | -1.77249600 |
| C | -3.89278600 | -0.49197400 | -0.00651100 |
| O | -5.01886500 | -0.49832200 | 0.51382700  |
| O | -3.49815000 | -1.17029300 | -1.00228900 |
| H | -1.93836100 | -1.57476900 | -1.18828900 |

**TS18-34**

|   |             |             |             |
|---|-------------|-------------|-------------|
| N | -0.35119300 | -0.89097800 | 0.42857700  |
| H | -0.89643200 | -1.43322200 | 1.09791800  |
| H | -0.08894200 | 0.90107600  | 0.67693500  |
| C | -2.51483100 | -0.21366000 | -0.47661800 |
| C | -3.51783000 | -1.13175000 | -0.15194700 |
| C | -2.81744100 | 1.14937200  | -0.46464400 |

|   |             |             |             |
|---|-------------|-------------|-------------|
| C | -4.79649900 | -0.69987500 | 0.18888200  |
| H | -3.29314700 | -2.19912900 | -0.17652100 |
| C | -4.09674400 | 1.58440100  | -0.12753200 |
| H | -2.04263300 | 1.87210900  | -0.71386800 |
| C | -5.08753200 | 0.66235000  | 0.20172900  |
| H | -5.56736400 | -1.42641600 | 0.43545200  |
| H | -4.31998600 | 2.64867700  | -0.12371900 |
| H | -6.08632300 | 1.00400100  | 0.46314800  |
| C | -1.13402000 | -0.71034800 | -0.80747200 |
| H | -0.59291600 | -0.00116500 | -1.44544000 |
| H | -1.23840500 | -1.64552100 | -1.38280900 |
| C | 3.96150700  | 0.34387200  | -0.98195300 |
| C | 3.76136100  | 0.84818100  | 0.43918800  |
| C | 2.26028900  | 0.68239400  | 0.63863900  |
| C | 3.04536800  | -0.86453500 | -1.01390800 |
| H | 3.62159300  | 1.10134200  | -1.70078900 |
| H | 5.00022600  | 0.09049900  | -1.21664200 |
| H | 4.08808700  | 1.87827300  | 0.60250000  |
| H | 4.29311800  | 0.19522500  | 1.14556600  |
| H | 2.02608600  | 0.45816100  | 1.69010600  |
| H | 3.54581000  | -1.72536700 | -0.52977700 |
| H | 2.76604400  | -1.17856500 | -2.02311900 |
| N | 1.86271400  | -0.42727200 | -0.25700000 |
| C | 1.47551200  | 1.95009700  | 0.30392600  |
| O | 1.97733700  | 2.99382000  | -0.05014700 |
| O | 0.15655000  | 1.84288100  | 0.46839700  |
| C | 0.99334800  | -1.48285800 | 0.28839100  |
| C | 1.42782300  | -1.97177300 | 1.67460300  |
| H | 1.31425700  | -1.20724900 | 2.44857400  |
| H | 0.82264600  | -2.83605900 | 1.97309400  |
| H | 2.47967300  | -2.28330500 | 1.64832800  |
| N | 1.02923800  | -2.60978200 | -0.63601500 |
| H | 1.42737900  | -3.43970200 | -0.21314900 |
| H | 0.12296100  | -2.84625400 | -1.01843000 |

#### TS34-35

|   |             |             |             |
|---|-------------|-------------|-------------|
| N | -0.40568700 | -0.81822300 | 0.35447200  |
| H | -0.88695400 | -1.09049100 | 1.20702400  |
| H | 0.28678800  | 0.97817800  | -0.60321900 |
| C | -2.64477900 | -0.27266900 | -0.41379200 |
| C | -3.74033300 | -1.08712900 | -0.12209600 |
| C | -2.79234800 | 1.11464600  | -0.31985400 |
| C | -4.96281200 | -0.53356800 | 0.25394500  |
| H | -3.63432800 | -2.16937400 | -0.19801700 |
| C | -4.01184800 | 1.67107500  | 0.05243300  |
| H | -1.94623100 | 1.76412200  | -0.54087600 |
| C | -5.10015500 | 0.84865600  | 0.34120900  |
| H | -5.80736900 | -1.18230200 | 0.47492800  |
| H | -4.11409000 | 2.75194500  | 0.11554100  |
| H | -6.05286900 | 1.28602200  | 0.63072600  |
| C | -1.32836800 | -0.89680900 | -0.78705400 |
| H | -0.87686100 | -0.38418500 | -1.64953600 |
| H | -1.50444700 | -1.93078100 | -1.12041600 |

|   |            |             |             |
|---|------------|-------------|-------------|
| C | 4.10514500 | 0.14945000  | -0.68546000 |
| C | 3.73229900 | 0.66813500  | 0.69665000  |
| C | 2.21080800 | 0.66996900  | 0.61598100  |
| C | 3.09508100 | -0.96864600 | -0.87733900 |
| H | 3.95523700 | 0.93764800  | -1.43667500 |
| H | 5.13852600 | -0.20112200 | -0.76561000 |
| H | 4.13238200 | 1.65675100  | 0.93443900  |
| H | 4.06210500 | -0.03987700 | 1.46924000  |
| H | 1.74239200 | 0.56879300  | 1.60541800  |
| H | 3.46379600 | -1.86794400 | -0.34565400 |
| H | 2.93345700 | -1.23882600 | -1.92639900 |
| N | 1.85463100 | -0.45627200 | -0.27106600 |
| C | 1.68683700 | 2.00466600  | 0.07809400  |
| O | 2.23443500 | 3.06650600  | 0.27013400  |
| O | 0.53598200 | 1.92498800  | -0.58862900 |
| C | 0.90452800 | -1.45863100 | 0.25144200  |
| C | 1.29549000 | -1.97361500 | 1.64271500  |
| H | 1.20988700 | -1.20694900 | 2.42162000  |
| H | 0.64799400 | -2.81154600 | 1.92852100  |
| H | 2.32982000 | -2.33793800 | 1.63193900  |
| N | 0.85823900 | -2.54772900 | -0.72334100 |
| H | 1.74432500 | -3.04534500 | -0.75129900 |
| H | 0.16555200 | -3.22634900 | -0.41543300 |

#### TS35-36

|   |             |             |             |
|---|-------------|-------------|-------------|
| N | -0.31698000 | 1.17452400  | -0.19653500 |
| H | -0.82565700 | 1.86117700  | -0.74217900 |
| H | 1.79208200  | -0.12627700 | 1.79572200  |
| C | -2.45545400 | 0.18545300  | 0.33845200  |
| C | -3.56028600 | 1.03725000  | 0.30332100  |
| C | -2.57735100 | -1.10284700 | -0.18857700 |
| C | -4.76797200 | 0.61490600  | -0.24940100 |
| H | -3.47318600 | 2.03990600  | 0.72338900  |
| C | -3.78202400 | -1.52995100 | -0.73784200 |
| H | -1.72252700 | -1.77884800 | -0.15346400 |
| C | -4.87990200 | -0.67050700 | -0.77157800 |
| H | -5.62282200 | 1.28727500  | -0.26563500 |
| H | -3.86759100 | -2.53851500 | -1.13584600 |
| H | -5.82235900 | -1.00704500 | -1.19745200 |
| C | -1.14545700 | 0.66631200  | 0.89677100  |
| H | -0.62693500 | -0.16031000 | 1.39646600  |
| H | -1.33553500 | 1.42270100  | 1.67779700  |
| C | 3.84270600  | -0.75074100 | -0.94004200 |
| C | 2.59028600  | -1.52198900 | -1.33963200 |
| C | 1.51652200  | -0.90135800 | -0.43865800 |
| C | 3.30493300  | 0.66362800  | -0.79340200 |
| H | 4.22517200  | -1.11501600 | 0.02394300  |
| H | 4.65202900  | -0.82049100 | -1.67343100 |
| H | 2.66241000  | -2.60547200 | -1.21154900 |
| H | 2.34233900  | -1.31687800 | -2.38882600 |
| H | 0.52843200  | -0.91211100 | -0.92157100 |
| H | 3.25315900  | 1.14554000  | -1.78681400 |
| H | 3.93973700  | 1.29362100  | -0.15275900 |

|   |            |             |             |
|---|------------|-------------|-------------|
| N | 1.98210200 | 0.45603500  | -0.20736400 |
| C | 1.36622900 | -1.71469200 | 0.84931700  |
| O | 1.02795400 | -2.87871100 | 0.83754600  |
| O | 1.61784400 | -1.07606200 | 1.99265500  |
| C | 1.05722800 | 1.57723000  | 0.02865300  |
| C | 1.35058000 | 2.74228500  | -0.91508000 |
| H | 1.19721500 | 2.45173600  | -1.96181300 |
| H | 0.68038700 | 3.57689900  | -0.67824000 |
| H | 2.37721900 | 3.10446200  | -0.80265600 |
| N | 1.25729900 | 1.95029500  | 1.44438100  |
| H | 2.21474500 | 2.27500700  | 1.57033300  |
| H | 0.64814500 | 2.72497600  | 1.70579000  |

### TS36-37

|   |             |             |             |
|---|-------------|-------------|-------------|
| N | -0.33957300 | 1.36474800  | -0.17991500 |
| H | -0.80498100 | 2.24025100  | -0.39115900 |
| H | 1.74424200  | 0.87037600  | 1.84552800  |
| C | -2.40739000 | 0.17027500  | 0.33373200  |
| C | -3.48047500 | 1.06345700  | 0.29527800  |
| C | -2.58975500 | -1.13103800 | -0.13713800 |
| C | -4.71290700 | 0.67062800  | -0.21958500 |
| H | -3.35304300 | 2.07447500  | 0.68530600  |
| C | -3.82201500 | -1.52792100 | -0.64923600 |
| H | -1.76589600 | -1.84279900 | -0.08358900 |
| C | -4.88388100 | -0.62705000 | -0.69587300 |
| H | -5.54226800 | 1.37392100  | -0.24044500 |
| H | -3.95474800 | -2.54634500 | -1.00650200 |
| H | -5.84689700 | -0.93981600 | -1.09262000 |
| C | -1.07052700 | 0.61842000  | 0.85430900  |
| H | -0.48180100 | -0.24158500 | 1.17760600  |
| H | -1.21793100 | 1.24840700  | 1.74824500  |
| C | 3.65121000  | -0.98159800 | -1.01403400 |
| C | 2.35499100  | -1.72290000 | -1.32681300 |
| C | 1.34603700  | -0.99752500 | -0.44026900 |
| C | 3.21213000  | 0.47683100  | -0.88654100 |
| H | 4.06110000  | -1.33690100 | -0.06109600 |
| H | 4.42288700  | -1.11106300 | -1.77897500 |
| H | 2.39273800  | -2.79167500 | -1.10155200 |
| H | 2.08159700  | -1.59575700 | -2.38266400 |
| H | 0.32340200  | -1.11265200 | -0.82236000 |
| H | 3.38108600  | 1.03166900  | -1.82077000 |
| H | 3.75907800  | 0.99367600  | -0.08295700 |
| N | 1.77273900  | 0.39705600  | -0.60291400 |
| C | 1.39887300  | -1.55463400 | 1.00986900  |
| O | 0.95885100  | -2.70921700 | 1.13356700  |
| O | 1.87011100  | -0.80368800 | 1.91627500  |
| C | 1.05013500  | 1.49954700  | -0.24082900 |
| C | 1.45367900  | 2.78512900  | -0.92500700 |
| H | 1.17710000  | 2.72476600  | -1.98368100 |
| H | 0.94003500  | 3.63748400  | -0.46888300 |
| H | 2.52881100  | 2.96509800  | -0.86399700 |
| N | 1.58960800  | 1.85179700  | 1.49456000  |
| H | 2.46367900  | 2.37088300  | 1.53980400  |



|   |            |            |            |
|---|------------|------------|------------|
| H | 0.90007800 | 2.34588600 | 2.05674100 |
|---|------------|------------|------------|

**TS24-38**

|   |             |             |             |
|---|-------------|-------------|-------------|
| N | 0.69235500  | -0.04060200 | 0.53326700  |
| H | 0.94945400  | 0.63934700  | -0.17339900 |
| C | 3.05991100  | -0.48519100 | 0.29975000  |
| C | 3.54655900  | -0.74099600 | -0.98362600 |
| C | 3.79226100  | 0.34381800  | 1.15255200  |
| C | 4.74953500  | -0.18229700 | -1.40871900 |
| H | 2.97813600  | -1.39126000 | -1.64907400 |
| C | 4.99392500  | 0.90454700  | 0.73066500  |
| H | 3.41288100  | 0.54610900  | 2.15378100  |
| C | 5.47446800  | 0.64154800  | -0.55115500 |
| H | 5.12336800  | -0.39432000 | -2.40756800 |
| H | 5.55987800  | 1.54433400  | 1.40359900  |
| H | 6.41598300  | 1.07521400  | -0.87953600 |
| C | 1.73858400  | -1.05009700 | 0.73275800  |
| H | 1.77353700  | -1.32294400 | 1.79571800  |
| H | 1.50658300  | -1.95664600 | 0.15469600  |
| C | -2.36328100 | 2.70968200  | -0.19120700 |
| C | -3.52550900 | 1.73283400  | -0.24325500 |
| C | -2.98616700 | 0.45714800  | 0.42719400  |
| C | -1.16674300 | 1.81091900  | -0.45173900 |
| H | -2.44780500 | 3.52007600  | -0.92099800 |
| H | -2.27435200 | 3.15517900  | 0.80794100  |
| H | -3.77485400 | 1.51067000  | -1.29081000 |
| H | -4.43778600 | 2.08301100  | 0.24493700  |
| H | -3.23222000 | 0.45286200  | 1.49914900  |
| H | -0.24147700 | 2.23718200  | -0.04781800 |
| H | -1.02971600 | 1.62656400  | -1.53267100 |
| N | -1.52829500 | 0.58056000  | 0.25196900  |
| C | -3.72801000 | -0.72898000 | -0.20628000 |
| O | -4.89716800 | -0.86701300 | 0.12930100  |
| O | -3.13489700 | -1.45203600 | -1.10335300 |
| C | -0.63603900 | -0.42002900 | 0.50429800  |
| C | -1.03708700 | -1.43304300 | 1.53780100  |
| H | -2.05068700 | -1.80213100 | 1.37489300  |
| H | -0.37058400 | -2.29571100 | 1.51742300  |
| H | -0.98879900 | -0.95946800 | 2.52523100  |
| O | -0.74246200 | -1.53793900 | -0.94884200 |
| H | -0.30565600 | -1.08125000 | -1.67999100 |

**TS38-39**

|   |            |             |             |
|---|------------|-------------|-------------|
| N | 0.73240500 | -0.10069400 | 0.20939300  |
| H | 0.94906500 | 0.13710700  | -0.75957300 |
| C | 3.13486800 | -0.45240200 | 0.29400000  |
| C | 3.90362100 | -1.05695100 | -0.70054800 |
| C | 3.61995200 | 0.70078500  | 0.91792300  |
| C | 5.14020800 | -0.52461700 | -1.06322600 |
| H | 3.52960100 | -1.95439900 | -1.19211900 |
| C | 4.85186600 | 1.23582600  | 0.55809100  |
| H | 3.01845600 | 1.17637500  | 1.69190700  |
| C | 5.61559800 | 0.62260300  | -0.43528500 |

|   |             |             |             |
|---|-------------|-------------|-------------|
| H | 5.73092700  | -1.00816100 | -1.83782500 |
| H | 5.22087000  | 2.13078100  | 1.05405700  |
| H | 6.58032000  | 1.03858900  | -0.71627600 |
| C | 1.79195800  | -1.00773500 | 0.67456400  |
| H | 1.72735700  | -1.08921800 | 1.76768000  |
| H | 1.67644000  | -2.02169700 | 0.25454800  |
| C | -2.39735200 | 2.72829900  | -0.21913100 |
| C | -3.52749700 | 1.72830300  | -0.42530100 |
| C | -2.97060200 | 0.45725400  | 0.20684200  |
| C | -1.11851600 | 1.88525300  | -0.27216200 |
| H | -2.39741600 | 3.52368900  | -0.96943900 |
| H | -2.49380200 | 3.20605300  | 0.76279200  |
| H | -3.71273800 | 1.54747700  | -1.49289300 |
| H | -4.47414100 | 2.02038200  | 0.03400900  |
| H | -2.96011700 | 0.57719200  | 1.30295700  |
| H | -0.46795800 | 2.03472000  | 0.59558100  |
| H | -0.51982600 | 2.07266300  | -1.16842600 |
| N | -1.56214100 | 0.45983100  | -0.28318700 |
| C | -3.87680300 | -0.74425700 | -0.08281900 |
| O | -5.04715800 | -0.63219500 | 0.21853200  |
| O | -3.39938100 | -1.84137600 | -0.63119800 |
| C | -0.59598500 | -0.66052200 | 0.22013400  |
| C | -0.94724300 | -1.21604200 | 1.58052000  |
| H | -1.98463400 | -1.55329000 | 1.63074700  |
| H | -0.33019800 | -2.09595600 | 1.78277400  |
| H | -0.77063300 | -0.47213600 | 2.36677400  |
| O | -0.86322100 | -1.49880200 | -0.85613400 |
| H | -1.39147500 | -0.33651600 | -1.21530500 |
| H | -2.38831200 | -1.84342200 | -0.74662200 |

#### TS27-40

|   |             |             |             |
|---|-------------|-------------|-------------|
| C | 4.19736000  | 0.11231500  | -0.21447400 |
| C | 3.49457300  | -0.90137400 | -1.11225100 |
| C | 2.05172100  | -0.80050000 | -0.62600800 |
| C | 3.18209400  | 1.24851500  | -0.07231300 |
| H | 4.39934900  | -0.33983500 | 0.76489500  |
| H | 5.15157500  | 0.46275900  | -0.61787000 |
| H | 3.88374900  | -1.91752600 | -1.01992600 |
| H | 3.54290500  | -0.59490900 | -2.16430800 |
| H | 1.34889300  | -1.18708800 | -1.37253000 |
| H | 3.41926200  | 2.09289800  | -0.73261600 |
| H | 3.13783300  | 1.62533600  | 0.96057000  |
| N | 1.90065200  | 0.64739400  | -0.47624700 |
| C | 1.87651400  | -1.62531700 | 0.66817400  |
| O | 2.17801500  | -2.80913200 | 0.62855000  |
| O | 1.43439400  | -1.02895400 | 1.73673300  |
| C | 0.72291900  | 1.31550100  | -0.30753900 |
| C | 0.80005300  | 2.81569800  | -0.40740500 |
| H | -0.15240400 | 3.25767500  | -0.10331300 |
| H | 1.58291400  | 3.23311100  | 0.22825400  |
| H | 1.01268300  | 3.09740700  | -1.44515500 |
| N | -0.42746400 | 0.81216100  | -0.87824200 |
| H | -1.14931200 | 1.52237400  | -0.90665500 |

|   |             |             |             |
|---|-------------|-------------|-------------|
| C | -2.49078500 | -0.37210600 | -0.31849700 |
| C | -2.92174200 | 0.30427800  | 0.82828200  |
| C | -3.43685900 | -0.90793500 | -1.19095800 |
| C | -4.28005000 | 0.43904700  | 1.09347800  |
| H | -2.17457700 | 0.71339500  | 1.50921900  |
| C | -4.79875300 | -0.77534000 | -0.92438100 |
| H | -3.10422400 | -1.43713100 | -2.08309200 |
| C | -5.22143200 | -0.10059200 | 0.21678000  |
| H | -4.60733700 | 0.95937500  | 1.99077900  |
| H | -5.52847600 | -1.19882700 | -1.61058000 |
| H | -6.28349800 | 0.00242700  | 0.42691000  |
| C | -1.01854500 | -0.50777000 | -0.59521700 |
| H | -0.86454900 | -1.18593400 | -1.44464100 |
| H | -0.53735900 | -0.95147900 | 0.28281700  |
| O | 0.37104000  | 1.13115200  | 1.50014200  |
| H | 0.98118200  | 0.00266900  | 1.65686600  |
| H | 0.81907900  | 1.81537300  | 2.01237900  |

#### TS40-41

|   |             |             |             |
|---|-------------|-------------|-------------|
| C | -4.08555700 | 1.15873200  | 0.57841300  |
| C | -3.52212800 | -0.01854300 | 1.36222700  |
| C | -2.34246500 | -0.46898200 | 0.50747600  |
| C | -2.81648900 | 1.85295600  | 0.12196300  |
| H | -4.65926100 | 0.80252500  | -0.28815500 |
| H | -4.73319600 | 1.81245700  | 1.17032600  |
| H | -4.23270900 | -0.83229000 | 1.52298800  |
| H | -3.15559000 | 0.32301700  | 2.33901500  |
| H | -1.49205600 | -0.78570900 | 1.13358700  |
| H | -2.37032500 | 2.41314000  | 0.95883300  |
| H | -2.94946500 | 2.53487600  | -0.72289600 |
| N | -1.91147000 | 0.74318500  | -0.24997800 |
| C | -2.67309900 | -1.64736100 | -0.41162700 |
| O | -3.66097900 | -2.32980800 | -0.26322400 |
| O | -1.77981000 | -1.93705000 | -1.35626000 |
| C | -0.29253800 | 0.94864300  | -0.30799800 |
| C | -0.01170000 | 2.42937000  | -0.44033300 |
| H | 1.03619400  | 2.53315300  | -0.74330800 |
| H | -0.63608500 | 2.87700300  | -1.21914800 |
| H | -0.16197500 | 2.97386100  | 0.49988300  |
| N | 0.37616700  | 0.38313000  | 0.80483800  |
| H | 0.79659300  | 1.08271000  | 1.40545500  |
| C | 2.65194800  | -0.51724700 | 0.37685800  |
| C | 3.02527500  | -0.00062900 | -0.86908000 |
| C | 3.63640100  | -0.73448400 | 1.34122300  |
| C | 4.35864000  | 0.28922400  | -1.13872300 |
| H | 2.25453900  | 0.16440200  | -1.62215100 |
| C | 4.97345500  | -0.44347000 | 1.07316200  |
| H | 3.35295500  | -1.14119500 | 2.31202200  |
| C | 5.33677500  | 0.06915800  | -0.16818500 |
| H | 4.63960300  | 0.68282400  | -2.11322400 |
| H | 5.73004500  | -0.61880400 | 1.83478100  |
| H | 6.37888900  | 0.29499100  | -0.38256600 |
| C | 1.20568300  | -0.81421400 | 0.68287300  |

|   |             |             |             |
|---|-------------|-------------|-------------|
| H | 1.13827400  | -1.38257600 | 1.62085400  |
| H | 0.77765400  | -1.44498400 | -0.10289100 |
| O | -0.19951800 | 0.26625900  | -1.49709700 |
| H | -1.04365000 | -1.27273600 | -1.41621600 |
| H | -1.46606500 | 0.48500400  | -1.38807000 |

**TS33-42**

|   |             |             |             |
|---|-------------|-------------|-------------|
| C | -0.61021800 | -0.49707700 | 0.53723600  |
| N | 0.71128500  | -0.10688100 | 0.47273900  |
| H | 0.91123300  | 0.61984000  | -0.20517300 |
| C | 3.10157800  | -0.44487900 | 0.23456500  |
| C | 3.79379600  | -0.83095000 | -0.91334000 |
| C | 3.63568700  | 0.56265600  | 1.04395000  |
| C | 5.00369300  | -0.22534800 | -1.24827500 |
| H | 3.38451700  | -1.61746000 | -1.54633000 |
| C | 4.84046200  | 1.17159000  | 0.71009200  |
| H | 3.09746100  | 0.86442800  | 1.94203200  |
| C | 5.52772400  | 0.77711500  | -0.43757100 |
| H | 5.53636900  | -0.53801600 | -2.14321100 |
| H | 5.24869700  | 1.95143300  | 1.34862800  |
| H | 6.47177300  | 1.25047500  | -0.69659900 |
| C | 1.79190200  | -1.08724000 | 0.59290100  |
| H | 1.82791300  | -1.44776200 | 1.62981400  |
| H | 1.60281400  | -1.95592700 | -0.05515600 |
| C | -0.95158900 | -1.49252600 | 1.60726200  |
| H | -0.90422600 | -0.99872700 | 2.58481300  |
| H | -1.95210700 | -1.90292800 | 1.45853100  |
| H | -0.25413800 | -2.33037700 | 1.59078200  |
| N | -1.51605400 | 0.49534000  | 0.30866300  |
| C | -3.38765100 | 1.85881100  | 0.39652200  |
| C | -2.94537900 | 0.41470700  | 0.62698100  |
| C | -1.23693800 | 1.59775900  | -0.61899400 |
| H | -4.47084800 | 1.93136200  | 0.28037000  |
| H | -3.08046000 | 2.47536400  | 1.25074200  |
| H | -3.09119300 | 0.12102100  | 1.67408000  |
| H | -0.53113500 | 2.30726700  | -0.16141200 |
| H | -0.79324400 | 1.22693400  | -1.55634900 |
| C | -3.79617900 | -0.54559900 | -0.23369500 |
| O | -5.00966500 | -0.49296600 | -0.08322400 |
| O | -3.20410000 | -1.34478800 | -1.06517000 |
| O | -0.82706600 | -1.66427400 | -0.86884200 |
| H | -2.07174900 | -1.47761500 | -1.01628400 |
| H | -0.35719100 | -1.30509500 | -1.63249400 |
| C | -2.60145900 | 2.24080600  | -0.85231400 |
| H | -3.07864500 | 1.80365200  | -1.73919500 |
| H | -2.52838000 | 3.32018400  | -1.01142900 |

**TS42-43**

|   |             |             |             |
|---|-------------|-------------|-------------|
| C | -0.63338500 | -1.00286700 | -0.12726200 |
| N | 0.74545000  | -0.65856600 | -0.26978100 |
| H | 1.10664500  | -1.09089900 | -1.11414400 |
| C | 3.03422600  | -0.24726700 | 0.41483500  |
| C | 4.09270900  | -1.14959300 | 0.31548800  |

|   |             |             |             |
|---|-------------|-------------|-------------|
| C | 3.25347800  | 1.09194100  | 0.07884200  |
| C | 5.35101200  | -0.72495700 | -0.10912500 |
| H | 3.92864400  | -2.19529200 | 0.57377700  |
| C | 4.50662300  | 1.52041300  | -0.34288400 |
| H | 2.42803200  | 1.79964900  | 0.15037300  |
| C | 5.56013000  | 0.61052500  | -0.43775800 |
| H | 6.16704000  | -1.44000500 | -0.18306800 |
| H | 4.66599300  | 2.56594100  | -0.59678500 |
| H | 6.54075000  | 0.94505900  | -0.76793700 |
| C | 1.67177500  | -0.70866800 | 0.85317100  |
| H | 1.29763000  | -0.04470400 | 1.64718600  |
| H | 1.75911800  | -1.71584600 | 1.29735000  |
| C | -0.96077800 | -1.81529100 | 1.10527200  |
| H | -0.72254800 | -1.28111400 | 2.03354300  |
| H | -2.01237200 | -2.11112900 | 1.12782600  |
| H | -0.36485600 | -2.73346700 | 1.07583200  |
| N | -1.49866100 | 0.33383400  | -0.23746100 |
| C | -3.15353600 | 1.91790700  | 0.52172300  |
| C | -2.81182600 | 0.41177500  | 0.46316300  |
| C | -0.85393900 | 1.64612900  | -0.04398900 |
| H | -4.13631300 | 2.11469600  | 0.08687700  |
| H | -3.19662700 | 2.24300800  | 1.56626400  |
| H | -2.67652800 | 0.03842300  | 1.49013000  |
| H | -0.44367500 | 1.69551100  | 0.97899600  |
| H | -0.03597300 | 1.76803500  | -0.75565500 |
| C | -3.95929800 | -0.43232700 | -0.10379900 |
| O | -5.09523500 | -0.15466400 | 0.21617600  |
| O | -3.69762300 | -1.47839100 | -0.86842200 |
| O | -1.11858700 | -1.50248900 | -1.31839100 |
| H | -2.72238000 | -1.62766400 | -1.07105000 |
| H | -1.51753200 | -0.26026100 | -1.33374400 |
| C | -2.00925600 | 2.61020300  | -0.21749600 |
| H | -1.78781000 | 3.60726800  | 0.17399100  |
| H | -2.24082200 | 2.71271900  | -1.28505900 |

#### TS37-44

|   |             |             |             |
|---|-------------|-------------|-------------|
| N | -0.47893300 | 0.80420700  | -0.60338000 |
| H | -1.18423800 | 1.52927900  | -0.53356100 |
| H | 1.25401300  | 0.14377200  | 1.73932600  |
| C | -2.53838200 | -0.37618700 | -0.10737200 |
| C | -3.19201000 | 0.28002300  | 0.93952500  |
| C | -3.29210500 | -0.90470100 | -1.15555300 |
| C | -4.57784100 | 0.40441500  | 0.93763800  |
| H | -2.60413800 | 0.68489000  | 1.76372100  |
| C | -4.67971800 | -0.78413700 | -1.15852900 |
| H | -2.78544400 | -1.41869400 | -1.97147500 |
| C | -5.32376700 | -0.12800700 | -0.11272800 |
| H | -5.07818200 | 0.90980700  | 1.76041300  |
| H | -5.25825300 | -1.20513200 | -1.97742500 |
| H | -6.40726800 | -0.03620300 | -0.11244100 |
| C | -1.03952100 | -0.47095600 | -0.10939900 |

|   |             |             |             |
|---|-------------|-------------|-------------|
| H | -0.73006300 | -1.30322200 | -0.75144300 |
| H | -0.68489000 | -0.67122200 | 0.90936300  |
| C | 4.18677600  | 0.04331000  | -0.47836900 |
| C | 3.37986100  | -1.01104400 | -1.22786100 |
| C | 1.99000000  | -0.83866900 | -0.62017800 |
| C | 3.21764400  | 1.21771700  | -0.34412200 |
| H | 4.45985400  | -0.33623400 | 0.51423400  |
| H | 5.11056600  | 0.32859100  | -0.98937700 |
| H | 3.75324900  | -2.02952200 | -1.10052300 |
| H | 3.33631900  | -0.78100300 | -2.29961500 |
| H | 1.21874600  | -1.24118100 | -1.28513600 |
| H | 3.39421300  | 1.98393900  | -1.11099100 |
| H | 3.29684600  | 1.69737900  | 0.64241300  |
| N | 1.88566200  | 0.61892900  | -0.53887500 |
| C | 1.91029600  | -1.59073700 | 0.72537600  |
| O | 2.10471500  | -2.79814700 | 0.70284000  |
| O | 1.67248800  | -0.91461800 | 1.80910900  |
| C | 0.75366500  | 1.32004800  | -0.24809300 |
| C | 0.83360200  | 2.80776100  | -0.46339800 |
| H | 0.89719500  | 3.01081100  | -1.53865400 |
| H | -0.05756900 | 3.29415100  | -0.05865200 |
| H | 1.70809000  | 3.24736000  | 0.01951100  |
| H | 1.19172100  | 1.97431300  | 1.99829200  |
| O | 0.66669000  | 1.26816000  | 1.60257400  |

#### TS44-45

|   |             |             |             |
|---|-------------|-------------|-------------|
| N | -0.45845400 | 0.94404400  | -0.14393900 |
| H | -0.99242700 | 1.48836600  | -0.81260800 |
| H | 1.35347300  | -0.06978500 | 2.06561000  |
| C | -2.63341300 | -0.02289900 | 0.32226900  |
| C | -3.80357300 | 0.67446500  | 0.62226600  |
| C | -2.70140600 | -1.11407900 | -0.54930200 |
| C | -5.02307400 | 0.28867300  | 0.06750200  |
| H | -3.75831000 | 1.52456900  | 1.30204800  |
| C | -3.91510000 | -1.50141800 | -1.10619800 |
| H | -1.79098100 | -1.66503600 | -0.78465600 |
| C | -5.08026800 | -0.79872600 | -0.79840000 |
| H | -5.92811700 | 0.83896000  | 0.31427700  |
| H | -3.95546800 | -2.35659200 | -1.77694600 |
| H | -6.03050100 | -1.10375700 | -1.23043500 |
| C | -1.31802400 | 0.40092400  | 0.91217000  |
| H | -0.82538300 | -0.46606900 | 1.37400300  |
| H | -1.48141700 | 1.13320500  | 1.71638200  |
| C | 3.69127500  | -0.28014500 | -1.61653100 |
| C | 2.58434600  | -1.31389600 | -1.46270700 |
| C | 1.80032900  | -0.80933000 | -0.25414400 |
| C | 2.94667100  | 1.00838300  | -1.32478000 |
| H | 4.47584000  | -0.44368200 | -0.86503700 |
| H | 4.16028200  | -0.28117800 | -2.60493600 |
| H | 2.94198600  | -2.33391900 | -1.30558400 |
| H | 1.93759900  | -1.30466700 | -2.34915900 |
| H | 0.71591500  | -0.93916900 | -0.40326400 |
| H | 2.32663600  | 1.29358500  | -2.18894500 |

|   |            |             |             |
|---|------------|-------------|-------------|
| H | 3.58833800 | 1.85371100  | -1.06007200 |
| N | 2.06597900 | 0.65875700  | -0.18792500 |
| C | 2.15642000 | -1.53590200 | 1.04722600  |
| O | 2.71897600 | -2.60759300 | 1.04975800  |
| O | 1.75778600 | -0.97279200 | 2.18480800  |
| C | 0.77218300 | 1.56251000  | 0.20063400  |
| C | 0.91958000 | 2.91683200  | -0.45740300 |
| H | 0.73128200 | 2.88502200  | -1.53739400 |
| H | 0.18948000 | 3.58696300  | 0.00865000  |
| H | 1.91518500 | 3.33205100  | -0.27671800 |
| H | 2.17480200 | 1.10527000  | 0.96916000  |
| O | 1.10116700 | 1.56166000  | 1.53456700  |

#### EtOH-5a

|   |             |             |             |
|---|-------------|-------------|-------------|
| C | 0.81335300  | 2.53396800  | 0.17349300  |
| C | 1.88043700  | 1.48277300  | -0.13986900 |
| C | 1.08867400  | 0.20911100  | -0.51618200 |
| C | -0.46864100 | 1.91645000  | -0.34480500 |
| H | 0.73365500  | 2.69013000  | 1.25646200  |
| H | 1.01767500  | 3.50493300  | -0.28655200 |
| H | 2.53197800  | 1.29574000  | 0.71856300  |
| H | 2.52740100  | 1.77580500  | -0.97130800 |
| H | 1.09553900  | 0.11645400  | -1.61832800 |
| H | -0.57937900 | 2.08112200  | -1.43224700 |
| H | -1.35732200 | 2.30793300  | 0.15819800  |
| N | -0.29293200 | 0.47881900  | -0.05518600 |
| C | 1.82462500  | -1.02658500 | -0.01499000 |
| O | 3.03081700  | -1.09747900 | -0.15726300 |
| O | 1.16032900  | -2.03007100 | 0.53610700  |
| H | 0.17186900  | -1.90362300 | 0.51126300  |
| C | -1.37365500 | -0.39053900 | -0.56798300 |
| C | -2.73589100 | 0.27317900  | -0.47337400 |
| H | -2.84181400 | 1.08870700  | -1.19338300 |
| H | -3.49382500 | -0.48526500 | -0.69253300 |
| H | -2.91941700 | 0.65389700  | 0.53623900  |
| N | -1.14460900 | -0.80546600 | -1.91972600 |
| H | -0.40684300 | -1.50110100 | -1.99263800 |
| H | -1.98567800 | -1.22522100 | -2.30530200 |
| O | -1.40520000 | -1.56009800 | 0.28476300  |
| H | -0.63582100 | 0.37615800  | 1.88663000  |
| O | -1.24174300 | 0.05573700  | 2.58816500  |
| H | -0.69338500 | -0.16896900 | 3.34775600  |
| H | -1.62887900 | -1.25502300 | 1.18964700  |

#### EtOH-5b

|   |             |            |             |
|---|-------------|------------|-------------|
| C | 0.37688200  | 2.65519400 | 0.39346600  |
| C | 1.57042300  | 1.81917700 | -0.03198700 |
| C | 0.92650200  | 0.51848300 | -0.49594500 |
| C | -0.48044000 | 1.62150700 | 1.10309900  |
| H | 0.64697200  | 3.49635100 | 1.03947600  |
| H | -0.14677000 | 3.05863500 | -0.48414200 |
| H | 2.21980900  | 1.61360500 | 0.82797300  |
| H | 2.18504300  | 2.26890200 | -0.81772300 |

|   |             |             |             |
|---|-------------|-------------|-------------|
| H | 0.64255800  | 0.60679200  | -1.55669700 |
| H | -1.54390100 | 1.86777000  | 1.14500800  |
| H | -0.13458700 | 1.48089500  | 2.13675900  |
| N | -0.28596900 | 0.34780500  | 0.35314300  |
| C | 1.87792200  | -0.67229300 | -0.38456700 |
| O | 2.89988500  | -0.66393000 | 0.26774500  |
| O | 1.54000200  | -1.75484300 | -1.08662100 |
| H | 0.61200800  | -1.66218000 | -1.40133200 |
| C | -1.48968700 | -0.15191400 | -0.35162700 |
| O | -1.13924100 | -1.42162800 | -0.92703400 |
| H | -0.06936800 | -1.22335700 | 1.57416500  |
| O | -0.40016700 | -2.12478700 | 1.77073700  |
| H | 0.32738900  | -2.61187800 | 2.17261100  |
| H | -1.04572200 | -2.04048900 | -0.17641100 |
| C | -1.97134800 | 0.71045000  | -1.50508000 |
| H | -2.88263800 | 0.27563800  | -1.92882400 |
| H | -2.20142400 | 1.72055300  | -1.15289700 |
| H | -1.23186800 | 0.77064200  | -2.30836500 |
| N | -2.53776700 | -0.26305700 | 0.62040400  |
| H | -3.39127700 | -0.59466200 | 0.18173600  |
| H | -2.28542500 | -0.90255900 | 1.37106300  |

#### EtOH-IM1

|   |             |             |             |
|---|-------------|-------------|-------------|
| C | 0.97426100  | 2.02677300  | 1.12428400  |
| C | 1.41209700  | 1.85225500  | -0.32455900 |
| C | 0.80712200  | 0.51475400  | -0.73376400 |
| C | -0.45225100 | 1.51867500  | 1.09096600  |
| H | 1.58295900  | 1.40103600  | 1.79285000  |
| H | 1.03422600  | 3.05864700  | 1.47961100  |
| H | 2.49585400  | 1.83697100  | -0.46098600 |
| H | 0.99653100  | 2.65893600  | -0.94043900 |
| H | 0.39245400  | 0.55083700  | -1.74765000 |
| H | -1.12456000 | 2.22228200  | 0.58774500  |
| H | -0.86592900 | 1.23175700  | 2.06179100  |
| N | -0.35292500 | 0.29729400  | 0.22674200  |
| C | 1.74875800  | -0.71507700 | -0.68459400 |
| O | 2.94886900  | -0.52732800 | -0.91680200 |
| O | 1.17030700  | -1.82391900 | -0.44387800 |
| H | -0.51380900 | -1.68607600 | -0.89687800 |
| C | -1.68320600 | -0.15607600 | -0.44974500 |
| C | -2.65790700 | -0.47145400 | 0.66626100  |
| H | -2.97486200 | 0.42767700  | 1.20454000  |
| H | -3.53917900 | -0.93759600 | 0.21594200  |
| H | -2.21559100 | -1.17869100 | 1.37603900  |
| N | -2.13392500 | 0.88854300  | -1.29777400 |
| H | -2.01603900 | 0.64906700  | -2.27564100 |
| H | -3.09025400 | 1.17041400  | -1.12000500 |
| O | -1.36594200 | -1.27922200 | -1.19893900 |
| H | -0.08897900 | -0.47416300 | 0.86892300  |
| O | 0.32801500  | -1.73777300 | 2.16617900  |
| H | 0.91990000  | -1.57820800 | 2.90975900  |
| H | 0.87197900  | -2.12691400 | 1.45604400  |



**EtOH-6a**

|   |             |             |             |
|---|-------------|-------------|-------------|
| C | 1.21245700  | 1.91703400  | 0.76954600  |
| C | 1.76056300  | 1.43515000  | -0.56779900 |
| C | 0.92092500  | 0.19774000  | -0.84050100 |
| C | -0.28971900 | 1.76924500  | 0.59102900  |
| H | 1.56250300  | 1.25817100  | 1.57598100  |
| H | 1.49555200  | 2.94264900  | 1.01975200  |
| H | 2.82319000  | 1.18717800  | -0.54394000 |
| H | 1.58750700  | 2.19030000  | -1.34528500 |
| H | 0.80304700  | -0.00953200 | -1.91438700 |
| H | -0.72236500 | 2.65339700  | 0.10386900  |
| H | -0.82868200 | 1.57068100  | 1.52256600  |
| N | -0.40552800 | 0.60322200  | -0.30973400 |
| C | 1.46973100  | -1.10637900 | -0.19411400 |
| O | 2.68912200  | -1.17254100 | 0.02075200  |
| O | 0.60498400  | -2.01512000 | 0.00088900  |
| H | -0.47851800 | -1.57983600 | 1.42785200  |
| C | -1.56150700 | 0.06574300  | -0.63997800 |
| C | -2.83063000 | 0.70579500  | -0.20823900 |
| H | -2.82468300 | 1.78403700  | -0.38686500 |
| H | -3.68340200 | 0.26167200  | -0.72462400 |
| H | -2.95126800 | 0.53505300  | 0.86851200  |
| N | -1.59924400 | -1.05400600 | -1.35908300 |
| H | -0.80273000 | -1.69056300 | -1.24162800 |
| H | -2.50119600 | -1.45881200 | -1.56720800 |
| O | -1.09699500 | -1.14814500 | 2.05246300  |
| H | -1.11336200 | -1.70841400 | 2.83462500  |

**EtOH-6b**

|   |             |             |             |
|---|-------------|-------------|-------------|
| C | 0.38250600  | 2.57807200  | -0.33526200 |
| C | 1.50485500  | 1.58763100  | -0.06023000 |
| C | 0.98676100  | 0.26363800  | -0.63043600 |
| C | -0.86557000 | 1.76044700  | -0.04711300 |
| H | 0.43627800  | 3.47584300  | 0.28604400  |
| H | 0.39330400  | 2.88810500  | -1.38764100 |
| H | 1.65065900  | 1.47982400  | 1.02439200  |
| H | 2.46321900  | 1.86465600  | -0.50649100 |
| H | 1.23441500  | 0.17552100  | -1.69710200 |
| H | -1.74276500 | 2.09672900  | -0.61129800 |
| H | -1.10870400 | 1.73106300  | 1.02397700  |
| N | -0.47868900 | 0.40720200  | -0.48838100 |
| C | 1.61132500  | -0.92000800 | 0.13840000  |
| O | 2.71146500  | -1.30265400 | -0.30775800 |
| O | 0.99966100  | -1.34568400 | 1.15329100  |
| H | -0.35818000 | -0.62072500 | 1.99907100  |
| C | -1.34855400 | -0.54462700 | -0.74209600 |
| O | -1.13540100 | -0.21598100 | 2.45119500  |
| H | -1.11269700 | -0.54702500 | 3.35401600  |
| C | -0.92357900 | -1.84251400 | -1.32708100 |
| H | -0.12392600 | -1.70774100 | -2.05976400 |
| H | -0.54613100 | -2.48675600 | -0.52518700 |
| H | -1.76719000 | -2.33993800 | -1.80978300 |
| N | -2.64265900 | -0.36092800 | -0.49250200 |

|   |             |             |             |
|---|-------------|-------------|-------------|
| H | -3.29465800 | -1.11166500 | -0.66857900 |
| H | -2.96644600 | 0.39691400  | 0.09361800  |

#### EtOH-6c

|   |             |             |             |
|---|-------------|-------------|-------------|
| C | -0.92650200 | 2.14047700  | -0.32719100 |
| C | -1.41763300 | 1.31172900  | 0.85496600  |
| C | -0.68643500 | -0.01114600 | 0.68427400  |
| C | 0.55069000  | 1.78693400  | -0.39483400 |
| H | -1.43265400 | 1.82197500  | -1.24760300 |
| H | -1.08934700 | 3.21439400  | -0.20311700 |
| H | -2.50133500 | 1.17739300  | 0.87615700  |
| H | -1.10412900 | 1.77530400  | 1.79819200  |
| H | -0.44692000 | -0.49182300 | 1.64517700  |
| H | 1.13727100  | 2.40652900  | 0.30079400  |
| H | 0.97508300  | 1.90101300  | -1.39803500 |
| N | 0.57397800  | 0.37984600  | 0.02867800  |
| C | -1.46260300 | -1.04206000 | -0.14579100 |
| O | -2.58690100 | -0.84807500 | -0.56823700 |
| O | -0.83129700 | -2.18421300 | -0.35133600 |
| C | 1.68684100  | -0.39277900 | 0.09604600  |
| C | 2.97711700  | 0.24204500  | -0.31831800 |
| H | 3.15091400  | 1.17979000  | 0.22014600  |
| H | 3.81188700  | -0.43544800 | -0.12750900 |
| H | 2.96285600  | 0.47647500  | -1.38880000 |
| N | 1.56554200  | -1.62635300 | 0.49002700  |
| H | 0.11589700  | -2.14744300 | 0.04496900  |
| H | 2.46057500  | -2.10551100 | 0.51036500  |

#### EtOH-6c-no-Hbond

|   |             |             |             |
|---|-------------|-------------|-------------|
| C | 0.58172400  | 2.23279700  | 0.31230900  |
| C | 1.27250000  | 1.44091800  | -0.79371000 |
| C | 0.68114200  | 0.03003800  | -0.64882600 |
| C | -0.83122100 | 1.67545100  | 0.28769900  |
| H | 1.05193600  | 2.03571900  | 1.28530000  |
| H | 0.60536700  | 3.31277200  | 0.14378100  |
| H | 2.36436100  | 1.44045400  | -0.72991300 |
| H | 0.99306000  | 1.84131000  | -1.77496800 |
| H | 0.55483700  | -0.46781100 | -1.61820700 |
| H | -1.42475600 | 2.15068500  | -0.50887400 |
| H | -1.36355300 | 1.80213700  | 1.23580400  |
| N | -0.61262900 | 0.24949800  | -0.00596200 |
| C | 1.59434900  | -0.87391000 | 0.16510100  |
| O | 2.64102800  | -1.29944700 | -0.27288900 |
| O | 1.20791800  | -1.14882200 | 1.41241900  |
| C | -1.63462700 | -0.65950400 | -0.21194900 |
| C | -2.99210200 | -0.22171600 | 0.25086100  |
| H | -3.32654900 | 0.66937100  | -0.29248000 |
| H | -3.72242700 | -1.01765200 | 0.09012200  |
| H | -2.98178800 | 0.03033600  | 1.31728400  |
| N | -1.34691100 | -1.79923400 | -0.73621300 |
| H | 0.33260000  | -0.73746600 | 1.55399100  |
| H | -2.18845300 | -2.36999700 | -0.79177900 |

**EtOH-6b**

|   |             |             |             |
|---|-------------|-------------|-------------|
| C | 0.38250600  | 2.57807200  | -0.33526200 |
| C | 1.50485500  | 1.58763100  | -0.06023000 |
| C | 0.98676100  | 0.26363800  | -0.63043600 |
| C | -0.86557000 | 1.76044700  | -0.04711300 |
| H | 0.43627800  | 3.47584300  | 0.28604400  |
| H | 0.39330400  | 2.88810500  | -1.38764100 |
| H | 1.65065900  | 1.47982400  | 1.02439200  |
| H | 2.46321900  | 1.86465600  | -0.50649100 |
| H | 1.23441500  | 0.17552100  | -1.69710200 |
| H | -1.74276500 | 2.09672900  | -0.61129800 |
| H | -1.10870400 | 1.73106300  | 1.02397700  |
| N | -0.47868900 | 0.40720200  | -0.48838100 |
| C | 1.61132500  | -0.92000800 | 0.13840000  |
| O | 2.71146500  | -1.30265400 | -0.30775800 |
| O | 0.99966100  | -1.34568400 | 1.15329100  |
| H | -0.35818000 | -0.62072500 | 1.99907100  |
| C | -1.34855400 | -0.54462700 | -0.74209600 |
| O | -1.13540100 | -0.21598100 | 2.45119500  |
| H | -1.11269700 | -0.54702500 | 3.35401600  |
| C | -0.92357900 | -1.84251400 | -1.32708100 |
| H | -0.12392600 | -1.70774100 | -2.05976400 |
| H | -0.54613100 | -2.48675600 | -0.52518700 |
| H | -1.76719000 | -2.33993800 | -1.80978300 |
| N | -2.64265900 | -0.36092800 | -0.49250200 |
| H | -3.29465800 | -1.11166500 | -0.66857900 |
| H | -2.96644600 | 0.39691400  | 0.09361800  |

**EtOH-7**

|   |             |             |             |
|---|-------------|-------------|-------------|
| N | 0.30380500  | -0.63970100 | -0.19175500 |
| H | -0.24454700 | 0.83633000  | -0.25647800 |
| H | 0.52242700  | -0.86618500 | 0.78010600  |
| C | 2.70094800  | -0.26599600 | -0.36897700 |
| C | 2.89813500  | 1.11382400  | -0.47746300 |
| C | 3.61285100  | -1.02603300 | 0.36492800  |
| C | 3.98852200  | 1.72217200  | 0.13694100  |
| H | 2.19090700  | 1.71091100  | -1.05329400 |
| C | 4.70704600  | -0.42012700 | 0.98052100  |
| H | 3.46543400  | -2.10227600 | 0.45006800  |
| C | 4.89614100  | 0.95492200  | 0.86729900  |
| H | 4.13402100  | 2.79573300  | 0.04239700  |
| H | 5.41261200  | -1.02361800 | 1.54671700  |
| H | 5.75006900  | 1.42972000  | 1.34474700  |
| C | 1.50288900  | -0.91298800 | -1.00277300 |
| H | 1.68268100  | -1.99369400 | -1.11747800 |
| H | 1.33898900  | -0.49658500 | -2.00499200 |
| C | -3.43761000 | -0.22188100 | 1.96925900  |
| C | -3.88165300 | 0.62014500  | 0.75917200  |
| C | -2.77027500 | 0.43602400  | -0.30038300 |
| C | -2.01662700 | -0.65563700 | 1.62785100  |
| H | -3.48309600 | 0.33565500  | 2.90997900  |
| H | -4.07525500 | -1.10622200 | 2.07493200  |
| H | -4.00281000 | 1.67888500  | 1.00461100  |

|   |             |             |             |
|---|-------------|-------------|-------------|
| H | -4.84022700 | 0.27082400  | 0.36495600  |
| H | -3.20419300 | 0.23496300  | -1.28926700 |
| H | -1.74762800 | -1.61835000 | 2.07522700  |
| H | -1.28845200 | 0.09719500  | 1.98957500  |
| N | -2.05907500 | -0.74026500 | 0.17281300  |
| C | -1.99906700 | 1.75675500  | -0.48382900 |
| O | -2.61449300 | 2.78019100  | -0.73685700 |
| O | -0.68207300 | 1.76361400  | -0.40964300 |
| C | -0.97164400 | -1.35382400 | -0.57051800 |
| C | -0.88075900 | -2.83670700 | -0.23364000 |
| H | -1.82396000 | -3.32862700 | -0.48850100 |
| H | -0.07311500 | -3.31674900 | -0.79747200 |
| H | -0.67872800 | -2.99374200 | 0.83007700  |
| N | -1.24507500 | -1.22153400 | -1.97958200 |
| H | -1.07196100 | -0.28261900 | -2.32944000 |
| H | -0.68159400 | -1.86538700 | -2.52512800 |

#### EtOH-8

|   |             |             |             |
|---|-------------|-------------|-------------|
| C | 3.63582800  | -0.02906900 | -1.70343700 |
| C | 2.87465900  | -1.32455400 | -1.40574900 |
| C | 1.68474700  | -0.91510600 | -0.52164600 |
| C | 3.22214400  | 0.87800300  | -0.56071100 |
| H | 4.71850200  | -0.18008300 | -1.75751900 |
| H | 3.30626800  | 0.40733100  | -2.65401200 |
| H | 3.50451200  | -2.02500300 | -0.84877300 |
| H | 2.53674800  | -1.83263300 | -2.31363900 |
| H | 0.72683000  | -1.16013400 | -1.00551200 |
| H | 3.34986100  | 1.94089900  | -0.79145600 |
| H | 3.80057100  | 0.65965700  | 0.35642700  |
| N | 1.80798800  | 0.54933000  | -0.40688700 |
| C | 1.68535700  | -1.66773100 | 0.81986500  |
| O | 2.61774600  | -2.31432400 | 1.25280700  |
| O | 0.54864000  | -1.57687300 | 1.51228800  |
| C | 1.03037700  | 1.33273400  | 0.54421400  |
| C | 1.04936100  | 2.80416400  | 0.13143900  |
| H | 0.26125700  | 3.34804900  | 0.66651800  |
| H | 2.00702800  | 3.26744000  | 0.38646900  |
| H | 0.88587800  | 2.91558900  | -0.94407900 |
| N | 1.56124600  | 1.26608500  | 1.90081700  |
| H | 1.30212300  | 0.41138500  | 2.38596400  |
| H | 1.24750700  | 2.05304000  | 2.46148900  |
| N | -0.34645600 | 0.76936900  | 0.52747000  |
| H | -0.02532500 | -0.85244000 | 1.11100600  |
| H | -0.85761400 | 1.21330300  | 1.29146200  |
| C | -2.48564500 | 0.31886400  | -0.52506600 |
| C | -2.66057800 | -1.06500600 | -0.62169200 |
| C | -3.58360300 | 1.11652000  | -0.19795600 |
| C | -3.90667400 | -1.63971200 | -0.39100800 |
| H | -1.81227600 | -1.69644100 | -0.88659300 |
| C | -4.83390500 | 0.54546700  | 0.03295000  |
| H | -3.45579300 | 2.19640400  | -0.12626700 |
| C | -4.99666800 | -0.83448900 | -0.06121500 |
| H | -4.02948700 | -2.71722800 | -0.47159000 |

|   |             |             |             |
|---|-------------|-------------|-------------|
| H | -5.68115400 | 1.17884700  | 0.28525700  |
| H | -5.97121800 | -1.28300500 | 0.11679200  |
| C | -1.12874700 | 0.93685800  | -0.71047600 |
| H | -1.24134600 | 1.99820000  | -0.98023400 |
| H | -0.58333100 | 0.45124900  | -1.52932100 |

**EtOH-11**

|   |             |             |             |
|---|-------------|-------------|-------------|
| C | -1.05519600 | 1.26621600  | -0.65169500 |
| N | -1.21160000 | 2.12177200  | 0.48500600  |
| H | -1.95254800 | 2.79532200  | 0.31346500  |
| N | 0.50126200  | 0.86474700  | -0.65116700 |
| H | 0.73339300  | 0.43749300  | -1.55241000 |
| H | 1.04465600  | 1.74450300  | -0.57108500 |
| C | 2.34865600  | -0.47971900 | 0.24501200  |
| C | 2.63872500  | -1.62506800 | -0.50134400 |
| C | 3.39745100  | 0.28257800  | 0.76522000  |
| C | 3.95958600  | -2.00074400 | -0.72949200 |
| H | 1.82238100  | -2.22880300 | -0.89850000 |
| C | 4.71866600  | -0.09323800 | 0.53961500  |
| H | 3.17342600  | 1.17263400  | 1.35237400  |
| C | 5.00067300  | -1.23444500 | -0.20936500 |
| H | 4.17663600  | -2.89538100 | -1.30782000 |
| H | 5.52892200  | 0.50285300  | 0.95197900  |
| H | 6.03261800  | -1.52925600 | -0.38341300 |
| C | 0.92406200  | -0.05942600 | 0.44531200  |
| H | 0.77139300  | 0.47522300  | 1.38830000  |
| H | 0.23750300  | -0.91266500 | 0.42028100  |
| O | 1.31054000  | 3.41274200  | 0.27509100  |
| H | 1.88338400  | 3.65225400  | 1.01126000  |
| H | 0.42223400  | 3.23102100  | 0.64870400  |
| C | -1.22691000 | 2.06373900  | -1.93539300 |
| H | -0.63132600 | 2.98221300  | -1.90361600 |
| H | -0.93967900 | 1.49448000  | -2.82411800 |
| H | -2.28453200 | 2.33314300  | -2.03568800 |
| N | -1.78080500 | 0.05157500  | -0.59344400 |
| C | -2.75165600 | -1.94765300 | -1.29673500 |
| C | -3.74238100 | -1.22871400 | -0.38901200 |
| C | -2.88610900 | -0.21406400 | 0.36110300  |
| C | -1.88071800 | -0.80107700 | -1.77645600 |
| H | -2.15226900 | -2.65450100 | -0.70932600 |
| H | -3.22350400 | -2.48883500 | -2.12257600 |
| H | -4.26343300 | -1.89730600 | 0.30054800  |
| H | -4.48785300 | -0.70123100 | -0.99982000 |
| H | -3.44987300 | 0.71099500  | 0.55554600  |
| H | -2.36554100 | -0.28133300 | -2.62136800 |
| H | -0.88823200 | -1.13646000 | -2.11715800 |
| C | -2.32122100 | -0.72125100 | 1.71607500  |
| O | -2.42338100 | -1.93695600 | 1.98814800  |
| O | -1.76926200 | 0.16260000  | 2.43544300  |
| H | -1.43469500 | 1.57709200  | 1.33514500  |

**EtOH-12**

|   |             |            |             |
|---|-------------|------------|-------------|
| C | -0.77516600 | 0.94850100 | -0.76197100 |
|---|-------------|------------|-------------|

|   |             |             |             |
|---|-------------|-------------|-------------|
| N | -1.00320200 | 1.98135700  | 0.26688500  |
| H | -1.72815300 | 2.62562900  | -0.04461600 |
| N | 0.63668900  | 0.56975500  | -0.69172200 |
| H | 0.87663400  | 0.00315200  | -1.50399300 |
| H | 1.61938300  | 2.21168200  | -0.70818000 |
| C | 2.51335400  | -0.48483500 | 0.43926000  |
| C | 2.90087200  | -1.66826300 | -0.19531600 |
| C | 3.50093500  | 0.36228600  | 0.94761100  |
| C | 4.24853800  | -1.99455300 | -0.32794300 |
| H | 2.13763900  | -2.34411900 | -0.58242700 |
| C | 4.84956100  | 0.03903100  | 0.81981000  |
| H | 3.20492100  | 1.27899700  | 1.45802000  |
| C | 5.22577500  | -1.13996000 | 0.17882400  |
| H | 4.53595400  | -2.91998500 | -0.82163600 |
| H | 5.60710200  | 0.70586200  | 1.22504900  |
| H | 6.27813000  | -1.39571100 | 0.08080800  |
| C | 1.06044200  | -0.11784400 | 0.53944400  |
| H | 0.90945300  | 0.56847100  | 1.38287000  |
| H | 0.44593200  | -1.01005100 | 0.73715600  |
| O | 1.79405600  | 3.15568200  | -0.49652400 |
| H | 2.72392500  | 3.21162900  | -0.25345500 |
| H | -0.15875500 | 2.54843800  | 0.36085300  |
| C | -1.03932300 | 1.51075300  | -2.15740200 |
| H | -0.44989200 | 2.42080700  | -2.31354500 |
| H | -0.77676100 | 0.79708900  | -2.94565200 |
| H | -2.10230100 | 1.75981200  | -2.26922500 |
| N | -1.63014600 | -0.19153200 | -0.42215300 |
| C | -2.84591000 | -2.12479400 | -0.96490800 |
| C | -3.84145600 | -0.98838400 | -0.77174600 |
| C | -3.02403800 | 0.04715000  | -0.01013000 |
| C | -1.57217700 | -1.36566900 | -1.29621800 |
| H | -2.72338800 | -2.68581600 | -0.02855200 |
| H | -3.13159500 | -2.82971600 | -1.75097300 |
| H | -4.75199200 | -1.27279600 | -0.23884600 |
| H | -4.12367300 | -0.57007600 | -1.74722500 |
| H | -3.36474500 | 1.06596800  | -0.25726000 |
| H | -1.57204500 | -1.09063900 | -2.36629300 |
| H | -0.66481500 | -1.95467400 | -1.10361200 |
| C | -3.13744900 | -0.10063400 | 1.51269000  |
| O | -3.95467900 | -0.81596200 | 2.06178300  |
| O | -2.27790900 | 0.61759700  | 2.22200900  |
| H | -1.68983100 | 1.16374300  | 1.60949300  |

#### EtOH-18

|   |             |             |             |
|---|-------------|-------------|-------------|
| N | -0.31886000 | -0.88998700 | 0.34805200  |
| H | -0.78932900 | -1.38162400 | 1.10672100  |
| H | -0.15217100 | 0.83270900  | 0.47468600  |
| C | -2.55229200 | -0.30952800 | -0.45938000 |
| C | -3.48320000 | -1.11499900 | 0.20431800  |
| C | -2.89476300 | 1.01114200  | -0.75687100 |
| C | -4.72544200 | -0.60818600 | 0.57571300  |
| H | -3.23295700 | -2.15343100 | 0.42455800  |
| C | -4.13905600 | 1.52055100  | -0.39141200 |

|   |             |             |             |
|---|-------------|-------------|-------------|
| H | -2.17652700 | 1.64502800  | -1.27452600 |
| C | -5.05565000 | 0.71326400  | 0.27822400  |
| H | -5.43936400 | -1.24679800 | 1.09067900  |
| H | -4.39278200 | 2.55052100  | -0.63158100 |
| H | -6.02680900 | 1.11031200  | 0.56415200  |
| C | -1.20638500 | -0.87090800 | -0.82807300 |
| H | -0.73312800 | -0.25104500 | -1.60180600 |
| H | -1.33924200 | -1.87959800 | -1.25008100 |
| C | 4.07679400  | 0.44876200  | -0.71597400 |
| C | 3.68057400  | 0.89823500  | 0.68268800  |
| C | 2.17225600  | 0.69221100  | 0.68502500  |
| C | 3.20257400  | -0.77665500 | -0.89989500 |
| H | 3.81797500  | 1.22152400  | -1.45248200 |
| H | 5.14223200  | 0.22157200  | -0.81891300 |
| H | 3.95742200  | 1.92798700  | 0.92250400  |
| H | 4.13393100  | 0.23286300  | 1.42957400  |
| H | 1.81433200  | 0.41307500  | 1.68724300  |
| H | 3.65086400  | -1.63932900 | -0.37639800 |
| H | 3.07420500  | -1.06115700 | -1.94918700 |
| N | 1.91279800  | -0.38706300 | -0.29898300 |
| C | 1.39347400  | 1.94740700  | 0.29941000  |
| O | 1.90242700  | 3.02076700  | 0.03924500  |
| O | 0.07515600  | 1.79652000  | 0.28982300  |
| C | 1.03999500  | -1.48141900 | 0.14524100  |
| C | 1.45790300  | -2.11389900 | 1.47313000  |
| H | 1.27218000  | -1.45008700 | 2.32343700  |
| H | 0.89450200  | -3.03823800 | 1.64700300  |
| H | 2.52271000  | -2.36744100 | 1.45041000  |
| N | 1.12090300  | -2.51131300 | -0.86649300 |
| H | 0.50428800  | -3.28710500 | -0.64361600 |
| H | 0.87242000  | -2.15535700 | -1.78580500 |

#### EtOH-19

|   |             |             |             |
|---|-------------|-------------|-------------|
| N | -0.65324000 | -0.18286600 | 0.26105600  |
| H | 1.69683200  | 1.37905800  | -1.13198000 |
| H | -0.75705900 | -0.88388500 | -0.46979700 |
| C | -3.06925400 | -0.02790600 | 0.43008700  |
| C | -3.40819100 | 1.26778900  | 0.02851300  |
| C | -3.92038500 | -1.08176700 | 0.09645600  |
| C | -4.57616600 | 1.50528400  | -0.68865300 |
| H | -2.74284400 | 2.09245100  | 0.28411900  |
| C | -5.09065300 | -0.84980000 | -0.62634800 |
| H | -3.66340500 | -2.09412200 | 0.40758500  |
| C | -5.42067700 | 0.44430400  | -1.01930300 |
| H | -4.83129000 | 2.51879500  | -0.99009400 |
| H | -5.74432000 | -1.68124900 | -0.88015100 |
| H | -6.33395200 | 0.62894300  | -1.58021700 |
| C | -1.78940900 | -0.28366000 | 1.17628900  |
| H | -1.85683400 | -1.26415000 | 1.67950300  |
| H | -1.66007300 | 0.47496800  | 1.96159500  |
| C | 2.98645900  | -2.14490800 | -1.04820600 |
| C | 3.83841500  | -0.88987100 | -0.94130000 |
| C | 3.01930100  | -0.02241300 | 0.02553700  |

|   |            |             |             |
|---|------------|-------------|-------------|
| C | 1.57956100 | -1.56740900 | -1.11147900 |
| H | 3.23276700 | -2.76586400 | -1.91498100 |
| H | 3.10528000 | -2.75866400 | -0.14439800 |
| H | 3.91050300 | -0.39820300 | -1.92268200 |
| H | 4.85392900 | -1.05664300 | -0.57166300 |
| H | 3.30112600 | -0.24168500 | 1.06557400  |
| H | 0.82361500 | -2.27624600 | -0.75456900 |
| H | 1.31305800 | -1.30124200 | -2.14447400 |
| N | 1.62229400 | -0.34484000 | -0.27516000 |
| C | 3.30663200 | 1.44304200  | -0.22351800 |
| O | 4.29860300 | 2.01252700  | 0.18396200  |
| O | 2.41668000 | 2.04846300  | -1.00933300 |
| C | 0.68317000 | -0.26207200 | 0.86817400  |
| C | 0.86339900 | -1.43209400 | 1.83797800  |
| H | 1.89215600 | -1.46934500 | 2.21342700  |
| H | 0.20107000 | -1.33282400 | 2.70496300  |
| H | 0.63380500 | -2.38777900 | 1.35530400  |
| N | 0.98555700 | 0.96584200  | 1.57516200  |
| H | 0.50687200 | 1.74883300  | 1.13551500  |
| H | 0.70101200 | 0.92287000  | 2.54763200  |

#### EtOH-20

|   |             |             |             |
|---|-------------|-------------|-------------|
| N | -0.65059400 | -0.25095300 | 0.21924900  |
| H | 1.64989600  | 1.42462800  | -1.05379600 |
| H | -0.68805000 | -0.80926900 | -0.62918800 |
| C | -3.07650100 | -0.14720000 | 0.37469900  |
| C | -3.36574200 | 1.20820800  | 0.18513200  |
| C | -3.98093500 | -1.09975100 | -0.09474400 |
| C | -4.53525000 | 1.60159800  | -0.45605800 |
| H | -2.65980600 | 1.95474400  | 0.54897500  |
| C | -5.15494300 | -0.71080100 | -0.74104400 |
| H | -3.76384300 | -2.15793800 | 0.04959300  |
| C | -5.43420600 | 0.64062600  | -0.92258600 |
| H | -4.75039800 | 2.65928600  | -0.59174300 |
| H | -5.85008900 | -1.46524300 | -1.10272300 |
| H | -6.34891400 | 0.94719000  | -1.42476700 |
| C | -1.80411100 | -0.55935800 | 1.06171700  |
| H | -1.86854800 | -1.62825200 | 1.33113700  |
| H | -1.68315500 | 0.00474600  | 1.99606800  |
| C | 3.06762200  | -2.04961800 | -1.07916900 |
| C | 3.89885000  | -0.79222400 | -0.88351600 |
| C | 3.01600500  | 0.04347200  | 0.05992900  |
| C | 1.66439500  | -1.47643500 | -1.19983500 |
| H | 3.36744200  | -2.63522400 | -1.95368600 |
| H | 3.13920500  | -2.69555900 | -0.19307100 |
| H | 4.02211600  | -0.27048100 | -1.84374700 |
| H | 4.89332000  | -0.95833800 | -0.46086700 |
| H | 3.28172100  | -0.18105000 | 1.10452800  |
| H | 0.88647400  | -2.20469000 | -0.94755500 |
| H | 1.47072100  | -1.13768100 | -2.22794300 |
| N | 1.63635800  | -0.31208000 | -0.28007000 |
| C | 3.27534600  | 1.51953600  | -0.17884800 |
| O | 4.26456500  | 2.09932800  | 0.21889200  |



|   |            |             |             |
|---|------------|-------------|-------------|
| O | 2.34935800 | 2.11812200  | -0.92477500 |
| C | 0.66306600 | -0.35941500 | 0.85256900  |
| C | 0.86383600 | -1.61514300 | 1.70590800  |
| H | 1.88033300 | -1.65066200 | 2.11638600  |
| H | 0.16895800 | -1.61964200 | 2.55104900  |
| H | 0.69849300 | -2.52884800 | 1.12545000  |
| N | 0.77950000 | 0.78405700  | 1.72270600  |
| H | 1.61369900 | 0.78552600  | 2.29916000  |
| H | 0.68760900 | 1.65900800  | 1.21568300  |

**EtOH-21**

|   |             |             |             |
|---|-------------|-------------|-------------|
| N | -0.48614200 | -0.35398600 | 0.06680200  |
| H | 3.53879100  | -0.38315200 | 1.08481300  |
| H | -0.27174700 | -0.04286000 | -0.87757800 |
| C | -2.92149800 | -0.54787500 | -0.13752400 |
| C | -3.23675100 | 0.53440000  | 0.69098800  |
| C | -3.85219600 | -0.95393900 | -1.09430200 |
| C | -4.45640200 | 1.19140000  | 0.56789500  |
| H | -2.50733700 | 0.85911200  | 1.43293200  |
| C | -5.07740800 | -0.29859400 | -1.22123000 |
| H | -3.61399100 | -1.79299600 | -1.74763600 |
| C | -5.38241300 | 0.77592100  | -0.39074900 |
| H | -4.68888900 | 2.03046900  | 1.22021700  |
| H | -5.79101100 | -0.62712100 | -1.97371700 |
| H | -6.33562900 | 1.29030600  | -0.48957300 |
| C | -1.61587800 | -1.27846200 | 0.03494000  |
| H | -1.52273900 | -2.04836400 | -0.75093800 |
| H | -1.62281400 | -1.80797100 | 0.99675400  |
| C | 1.53186400  | 2.52174500  | -0.10670900 |
| C | 2.71097300  | 1.90806400  | -0.84266900 |
| C | 2.43392000  | 0.40097200  | -0.70973200 |
| C | 1.37413600  | 1.59143400  | 1.08596200  |
| H | 1.70128600  | 3.56336600  | 0.18316100  |
| H | 0.63176400  | 2.48516700  | -0.73566800 |
| H | 3.64934900  | 2.16272200  | -0.32869700 |
| H | 2.80795500  | 2.20951300  | -1.88925600 |
| H | 1.82811400  | 0.06020500  | -1.56393900 |
| H | 0.34645700  | 1.57884600  | 1.46260700  |
| H | 2.03784800  | 1.89087800  | 1.90950600  |
| N | 1.76928000  | 0.24739800  | 0.59073900  |
| C | 3.75529900  | -0.34335100 | -0.75261800 |
| O | 4.35034800  | -0.59423900 | -1.77958000 |
| O | 4.25299900  | -0.63589300 | 0.44748400  |
| C | 0.73819900  | -0.81418600 | 0.72477400  |
| C | 1.27938500  | -2.12615300 | 0.16087600  |
| H | 2.19711200  | -2.43389800 | 0.67568400  |
| H | 0.53338200  | -2.91196000 | 0.31017300  |
| H | 1.48415000  | -2.06000400 | -0.91352100 |
| N | 0.40491300  | -1.04195100 | 2.11631600  |
| H | 1.23569200  | -1.31351500 | 2.63531400  |
| H | 0.03174600  | -0.19618100 | 2.53970500  |

**EtOH-22**

|   |             |             |             |
|---|-------------|-------------|-------------|
| N | -0.47043500 | -0.39701800 | 0.11125000  |
| H | 3.53479900  | -0.46777900 | 0.97568800  |
| H | -0.29132900 | -0.04285700 | -0.82657000 |
| C | -2.90026800 | -0.54190200 | -0.12727400 |
| C | -3.20109100 | 0.55935000  | 0.68131000  |
| C | -3.82473600 | -0.93908900 | -1.09350700 |
| C | -4.40280700 | 1.24292300  | 0.53023900  |
| H | -2.47564400 | 0.87798800  | 1.42961800  |
| C | -5.03131200 | -0.25600800 | -1.24889900 |
| H | -3.59642000 | -1.79234800 | -1.73166000 |
| C | -5.32342400 | 0.83629500  | -0.43720700 |
| H | -4.62532200 | 2.09599900  | 1.16762800  |
| H | -5.74067700 | -0.57742800 | -2.00834100 |
| H | -6.26259900 | 1.37144400  | -0.55737700 |
| C | -1.61371100 | -1.29978900 | 0.07408100  |
| H | -1.52929100 | -2.08575200 | -0.69730500 |
| H | -1.66161300 | -1.81883800 | 1.04236300  |
| C | 1.44656800  | 2.49628000  | 0.13057600  |
| C | 2.59410600  | 1.98583500  | -0.72563200 |
| C | 2.37589900  | 0.46233600  | -0.69744700 |
| C | 1.39984000  | 1.47015000  | 1.25082300  |
| H | 1.60044900  | 3.51822200  | 0.49090700  |
| H | 0.50765500  | 2.47089200  | -0.43977100 |
| H | 3.55532300  | 2.23495100  | -0.25281500 |
| H | 2.61321500  | 2.37056200  | -1.74884500 |
| H | 1.74594500  | 0.16321000  | -1.54945800 |
| H | 0.40665400  | 1.39911600  | 1.70384300  |
| H | 2.12126800  | 1.71614800  | 2.04293400  |
| N | 1.78210700  | 0.18477800  | 0.61389700  |
| C | 3.71923600  | -0.23029700 | -0.84708800 |
| O | 4.29677800  | -0.35166700 | -1.90748300 |
| O | 4.24835400  | -0.63371000 | 0.30515600  |
| C | 0.77973800  | -0.89436300 | 0.71081900  |
| C | 1.30660300  | -2.15935800 | 0.03926900  |
| H | 2.24112200  | -2.49311500 | 0.50295100  |
| H | 0.57168600  | -2.96484600 | 0.14467600  |
| H | 1.47129000  | -2.01291100 | -1.03352900 |
| N | 0.59368200  | -1.18821800 | 2.12086600  |
| H | -0.06956200 | -0.54238100 | 2.54264400  |
| H | 0.23666500  | -2.12823300 | 2.25856300  |

#### EtOH-23

|   |             |             |             |
|---|-------------|-------------|-------------|
| N | -0.71459900 | -0.22262400 | -0.17230500 |
| H | 2.49584500  | -1.03437700 | 1.41704100  |
| H | -0.77562900 | 0.25793500  | -1.06837500 |
| C | -3.13095600 | -0.48553100 | -0.01714500 |
| C | -3.45070300 | 0.38468600  | 1.03029700  |
| C | -4.06554700 | -0.68974300 | -1.03203000 |
| C | -4.68112800 | 1.03190400  | 1.06359600  |
| H | -2.72122100 | 0.54955300  | 1.82298500  |
| C | -5.30106000 | -0.04191300 | -1.00381400 |
| H | -3.82372300 | -1.36424200 | -1.85286300 |
| C | -5.61115400 | 0.81954500  | 0.04422800  |

|   |             |             |             |
|---|-------------|-------------|-------------|
| H | -4.91954800 | 1.70132200  | 1.88716200  |
| H | -6.02014200 | -0.21133500 | -1.80207900 |
| H | -6.57381900 | 1.32490600  | 0.07027800  |
| C | -1.80031600 | -1.18814000 | -0.04253600 |
| H | -1.81296000 | -1.94565200 | -0.84580100 |
| H | -1.66277300 | -1.73070800 | 0.90406000  |
| C | 2.22862500  | 2.61006000  | -0.27692800 |
| C | 3.38472800  | 1.76174600  | -0.82014400 |
| C | 2.89063400  | 0.28800800  | -0.73668900 |
| C | 1.41683100  | 1.61566700  | 0.53415200  |
| H | 2.57697700  | 3.46173800  | 0.31569800  |
| H | 1.61203300  | 2.99541500  | -1.09722000 |
| H | 4.28637000  | 1.88922900  | -0.21166200 |
| H | 3.65463200  | 2.02757100  | -1.84589500 |
| H | 2.93739600  | -0.18928900 | -1.72484100 |
| H | 0.37152800  | 1.90350100  | 0.67595500  |
| H | 1.87187200  | 1.47185600  | 1.53447600  |
| N | 1.51029400  | 0.41731700  | -0.29629300 |
| C | 3.88865900  | -0.49953500 | 0.12261100  |
| O | 5.04147300  | -0.61428700 | -0.25958300 |
| O | 3.50492100  | -1.02571000 | 1.27226500  |
| C | 0.65492100  | -0.71794100 | -0.01582300 |
| C | 0.98743700  | -1.87543300 | -0.95082600 |
| H | 2.00004700  | -2.26274600 | -0.79562000 |
| H | 0.29411800  | -2.70573400 | -0.78298400 |
| H | 0.88834000  | -1.55121500 | -1.99238700 |
| N | 0.86157100  | -1.17612300 | 1.37538300  |
| H | 0.36944300  | -0.55843700 | 2.01962500  |
| H | 0.51337800  | -2.11958700 | 1.52980100  |

#### EtOH-24

|   |             |             |             |
|---|-------------|-------------|-------------|
| N | -0.55145700 | -0.26788200 | 0.59226700  |
| H | 0.84572600  | 2.52139100  | -0.95967200 |
| H | -0.80955600 | -1.00114200 | -0.05805500 |
| C | -2.93580300 | 0.17075700  | 0.44269700  |
| C | -3.13764700 | 0.49797500  | -0.90202500 |
| C | -3.93278800 | -0.51688800 | 1.13479300  |
| C | -4.31742900 | 0.13763400  | -1.54500700 |
| H | -2.36084500 | 1.04107400  | -1.44009800 |
| C | -5.11819300 | -0.87303700 | 0.49435000  |
| H | -3.77944300 | -0.77282600 | 2.18208700  |
| C | -5.31064100 | -0.54823300 | -0.84610800 |
| H | -4.46634600 | 0.39725500  | -2.59031900 |
| H | -5.89098000 | -1.40611200 | 1.04280700  |
| H | -6.23467300 | -0.82654500 | -1.34712700 |
| C | -1.65126000 | 0.55300500  | 1.11861500  |
| H | -1.73361900 | 0.41093000  | 2.20386100  |
| H | -1.41305500 | 1.60618200  | 0.91174700  |
| C | 2.68795900  | -2.74194000 | -0.53329600 |
| C | 3.69847900  | -1.60490700 | -0.58742600 |
| C | 3.10821600  | -0.51639000 | 0.32014400  |
| C | 1.36090300  | -2.00454300 | -0.51146900 |
| H | 2.76363900  | -3.43021200 | -1.37920800 |

|   |             |             |             |
|---|-------------|-------------|-------------|
| H | 2.80383100  | -3.32004700 | 0.39183200  |
| H | 3.76985600  | -1.22066500 | -1.61469600 |
| H | 4.70299100  | -1.89136400 | -0.26617600 |
| H | 3.49929100  | -0.60480100 | 1.34211900  |
| H | 0.55086700  | -2.59069900 | -0.06312900 |
| H | 1.05711900  | -1.68105900 | -1.51913100 |
| N | 1.66271400  | -0.82924600 | 0.31656600  |
| C | 3.45209500  | 0.87811400  | -0.25270000 |
| O | 4.59014900  | 1.29230200  | 0.06368000  |
| O | 2.60637700  | 1.41765100  | -1.00547100 |
| C | 0.73741300  | -0.05113000 | 0.84657800  |
| C | 1.08888000  | 1.05367600  | 1.77521700  |
| H | 2.15276200  | 1.07512800  | 2.00725800  |
| H | 0.79364400  | 2.00770900  | 1.32245300  |
| H | 0.53055000  | 0.93407300  | 2.70954600  |
| N | -0.02447100 | 3.01820100  | -0.75193200 |
| H | -0.57072800 | 3.03665700  | -1.60878200 |
| H | 0.22816400  | 3.98338900  | -0.55747100 |

#### EtOH-25

|   |             |             |             |
|---|-------------|-------------|-------------|
| C | 3.92144200  | -0.36292300 | -0.99712800 |
| C | 2.79004200  | -1.25743300 | -1.48881800 |
| C | 1.63326900  | -0.88362800 | -0.57414300 |
| C | 3.21465100  | 0.93976000  | -0.63064600 |
| H | 4.38043500  | -0.80755900 | -0.10596200 |
| H | 4.70947700  | -0.21648700 | -1.74195200 |
| H | 3.02648000  | -2.32390600 | -1.44883500 |
| H | 2.51391200  | -1.00123900 | -2.51912200 |
| H | 0.66780500  | -1.09713500 | -1.06013100 |
| H | 3.29548800  | 1.68629800  | -1.43556900 |
| H | 3.65685500  | 1.38642800  | 0.27396200  |
| N | 1.81037100  | 0.56445900  | -0.42608300 |
| C | 1.63477100  | -1.69045800 | 0.73291900  |
| O | 2.50518800  | -2.47192600 | 1.06099000  |
| O | 0.57155300  | -1.49652400 | 1.51358100  |
| C | 1.01103400  | 1.40319600  | 0.46059400  |
| C | 1.04360600  | 2.84074000  | -0.05354400 |
| H | 0.33130500  | 3.45113900  | 0.51246600  |
| H | 2.03893400  | 3.28015300  | 0.07362900  |
| H | 0.79393600  | 2.88481400  | -1.11781200 |
| N | 1.41690400  | 1.44790800  | 1.86688600  |
| H | 2.27478400  | 1.97849800  | 1.98119000  |
| H | 1.57153600  | 0.51837000  | 2.24896000  |
| N | -0.35167200 | 0.83467100  | 0.49209300  |
| H | 0.00992500  | -0.74855200 | 1.13772200  |
| H | -0.83616800 | 1.30337000  | 1.25809900  |
| C | -2.50117000 | 0.31595600  | -0.50953600 |
| C | -2.65073800 | -1.07226200 | -0.58228500 |
| C | -3.60985500 | 1.09716300  | -0.17905400 |
| C | -3.88265500 | -1.66679100 | -0.32708800 |
| H | -1.79525800 | -1.69326600 | -0.84812100 |
| C | -4.84589700 | 0.50623500  | 0.07715200  |
| H | -3.50175000 | 2.18013200  | -0.12484100 |

|   |             |             |             |
|---|-------------|-------------|-------------|
| C | -4.98359200 | -0.87766700 | 0.00484000  |
| H | -3.98580700 | -2.74749600 | -0.39039300 |
| H | -5.70151100 | 1.12733900  | 0.33168700  |
| H | -5.94719300 | -1.34173600 | 0.20157800  |
| C | -1.16140100 | 0.95981100  | -0.73056300 |
| H | -1.30372200 | 2.01388700  | -1.01416900 |
| H | -0.62366000 | 0.47509700  | -1.55542600 |

#### EtOH-26

|   |             |             |             |
|---|-------------|-------------|-------------|
| C | -3.54835000 | 0.51491600  | -1.45518100 |
| C | -2.25246100 | 1.25097800  | -1.77133100 |
| C | -1.35804800 | 0.84919600  | -0.59404900 |
| C | -3.06506800 | -0.82960500 | -0.91666500 |
| H | -4.09886900 | 1.05590400  | -0.67277300 |
| H | -4.21464200 | 0.41006100  | -2.31632600 |
| H | -2.36285700 | 2.33456200  | -1.86067200 |
| H | -1.80786800 | 0.86808900  | -2.69831400 |
| H | -0.29873200 | 0.96426700  | -0.86423800 |
| H | -3.04281700 | -1.59741300 | -1.70588700 |
| H | -3.73390100 | -1.19981000 | -0.12328900 |
| N | -1.71065700 | -0.55188500 | -0.42684900 |
| C | -1.56215200 | 1.83241200  | 0.56819100  |
| O | -1.34174400 | 3.02080300  | 0.38936300  |
| O | -1.97823600 | 1.39406000  | 1.73908200  |
| C | -1.11007700 | -1.41777200 | 0.55765500  |
| C | -1.23864200 | -2.87789300 | 0.12433100  |
| H | -0.70555900 | -3.51708600 | 0.83829400  |
| H | -2.28524400 | -3.20036200 | 0.09931700  |
| H | -0.81480800 | -3.03298800 | -0.87376000 |
| N | -1.77538300 | -1.21559300 | 1.87798700  |
| H | -1.24632600 | -1.64502300 | 2.63554800  |
| H | -2.68284400 | -1.67741100 | 1.87907600  |
| N | 0.26566700  | -0.98448600 | 0.75780600  |
| H | -1.95214600 | 0.37241800  | 1.83746200  |
| H | 0.63339900  | -1.39006400 | 1.61556500  |
| C | 2.47523600  | -0.49477000 | -0.20898700 |
| C | 2.53034200  | 0.75841500  | 0.40716400  |
| C | 3.64856000  | -1.02827200 | -0.74952300 |
| C | 3.72984300  | 1.46403500  | 0.47388400  |
| H | 1.62364100  | 1.17455600  | 0.84262200  |
| C | 4.84795800  | -0.32360400 | -0.68832000 |
| H | 3.61954300  | -2.01021800 | -1.22146600 |
| C | 4.89263100  | 0.92731600  | -0.07508800 |
| H | 3.75556600  | 2.43788700  | 0.95802800  |
| H | 5.75152800  | -0.75548300 | -1.11306300 |
| H | 5.82894800  | 1.47797200  | -0.02162800 |
| C | 1.18368500  | -1.26121300 | -0.33954300 |
| H | 1.41627700  | -2.33533900 | -0.44503600 |
| H | 0.67942500  | -0.97450500 | -1.27486000 |

#### EtOH-27

|   |            |             |             |
|---|------------|-------------|-------------|
| C | 3.57333800 | -1.47559100 | -0.15454300 |
| C | 2.36520300 | -1.98913100 | -0.92866700 |

|   |             |             |             |
|---|-------------|-------------|-------------|
| C | 1.24908400  | -1.07926100 | -0.43685000 |
| C | 3.37111500  | 0.03611300  | -0.10814400 |
| H | 3.56562400  | -1.88601300 | 0.86235900  |
| H | 4.52878800  | -1.74189800 | -0.61456300 |
| H | 2.13655700  | -3.03992100 | -0.73562100 |
| H | 2.50779100  | -1.85554000 | -2.00874300 |
| H | 0.40283600  | -1.07245900 | -1.12534800 |
| H | 3.94384000  | 0.55509300  | -0.88684400 |
| H | 3.64882100  | 0.45494900  | 0.86436700  |
| N | 1.92509300  | 0.23266700  | -0.37067600 |
| C | 0.71580400  | -1.49970900 | 0.96596600  |
| O | 0.16901500  | -2.62804700 | 0.97837200  |
| O | 0.88339200  | -0.70188700 | 1.91538400  |
| C | 1.34091000  | 1.40223100  | -0.15288900 |
| C | 2.13082900  | 2.49628600  | 0.48658500  |
| H | 1.54956300  | 3.41843700  | 0.54094600  |
| H | 2.42845200  | 2.19969900  | 1.49846100  |
| H | 3.04359000  | 2.69768600  | -0.08332400 |
| N | -1.22848700 | 4.17729100  | 0.24086700  |
| H | -1.19556400 | 4.38180200  | 1.23627300  |
| H | -0.92682800 | 5.02030300  | -0.24046400 |
| N | 0.09183200  | 1.70863700  | -0.47892200 |
| H | -2.20932700 | 4.04438700  | 0.00647500  |
| H | -0.24452300 | 2.64185300  | -0.17685500 |
| C | -1.85564000 | 0.14546500  | -0.69768600 |
| C | -2.29731200 | 0.40616500  | 0.60003000  |
| C | -2.42595800 | -0.91142300 | -1.41048700 |
| C | -3.29158100 | -0.37991000 | 1.17693500  |
| H | -1.85093700 | 1.21978000  | 1.16994200  |
| C | -3.42113000 | -1.69752600 | -0.83581500 |
| H | -2.08236000 | -1.12402600 | -2.42301300 |
| C | -3.85688200 | -1.43298900 | 0.46122200  |
| H | -3.62211700 | -0.17070200 | 2.19170000  |
| H | -3.85154100 | -2.52220700 | -1.39899500 |
| H | -4.62995800 | -2.04884800 | 0.91434000  |
| C | -0.83630500 | 1.03056700  | -1.37152500 |
| H | -1.36476000 | 1.83943300  | -1.89634800 |
| H | -0.28511800 | 0.48977600  | -2.14847200 |

#### **EtOH-28**

|   |             |             |             |
|---|-------------|-------------|-------------|
| C | -0.66907100 | -0.98431200 | 0.86837200  |
| N | -0.93009300 | -2.14047300 | 0.01228600  |
| H | -1.80639500 | -2.58870300 | 0.26967200  |
| N | 0.74652400  | -0.69239400 | 0.76732700  |
| H | 1.02992200  | -0.03166200 | 1.48702200  |
| C | 2.73358200  | -0.00615500 | -0.43439200 |
| C | 3.20609500  | 1.30447200  | -0.35151500 |
| C | 3.65024900  | -1.06022900 | -0.37913300 |
| C | 4.57054500  | 1.56204500  | -0.22182800 |
| H | 2.49545900  | 2.13049900  | -0.39319100 |
| C | 5.01257700  | -0.80860700 | -0.25183200 |
| H | 3.28424000  | -2.08503700 | -0.43809200 |
| C | 5.47600300  | 0.50528400  | -0.17305900 |

|   |             |             |             |
|---|-------------|-------------|-------------|
| H | 4.92531900  | 2.58843100  | -0.16178400 |
| H | 5.71646400  | -1.63706500 | -0.21635800 |
| H | 6.54104700  | 0.70285500  | -0.07605800 |
| C | 1.26043200  | -0.28150500 | -0.53849600 |
| H | 1.07252100  | -1.09539100 | -1.25029900 |
| H | 0.75470200  | 0.61674200  | -0.93565900 |
| H | -0.19965100 | -2.82502800 | 0.19606400  |
| C | -0.98177600 | -1.26983200 | 2.33719100  |
| H | -0.42941800 | -2.15856300 | 2.65935500  |
| H | -0.69787900 | -0.43941700 | 2.99392400  |
| H | -2.05250300 | -1.46080100 | 2.47781500  |
| N | -1.48015100 | 0.13801600  | 0.33129900  |
| C | -2.53885800 | 2.22193400  | 0.60664000  |
| C | -3.60564900 | 1.14544900  | 0.75837700  |
| C | -2.92200100 | -0.08805300 | 0.15349200  |
| C | -1.27496700 | 1.45623100  | 0.95615200  |
| H | -2.49516600 | 2.58141100  | -0.43078700 |
| H | -2.69949000 | 3.08663600  | 1.25651700  |
| H | -4.55994700 | 1.37396900  | 0.27481700  |
| H | -3.79952700 | 0.95785200  | 1.82245400  |
| H | -3.28415100 | -1.00409200 | 0.64041200  |
| H | -1.17811500 | 1.37915200  | 2.05215700  |
| H | -0.36170300 | 1.92950500  | 0.57281800  |
| C | -3.26497700 | -0.22922200 | -1.32837300 |
| O | -4.38552800 | -0.47846700 | -1.72560100 |
| O | -2.24611400 | -0.02959100 | -2.15420900 |
| H | -1.46965200 | 0.10211800  | -1.54828200 |

#### EtOH-29

|   |             |             |             |
|---|-------------|-------------|-------------|
| C | 0.66381200  | 1.23067700  | 0.51767500  |
| N | 0.93795000  | 2.18776400  | -0.53470700 |
| H | 0.96286600  | 1.75820400  | -1.45539700 |
| N | -0.75678200 | 0.92775000  | 0.51832900  |
| H | -1.00437400 | 0.37961100  | 1.33905200  |
| C | -2.75524900 | -0.02760000 | -0.46298600 |
| C | -3.17192400 | -1.35123700 | -0.31545800 |
| C | -3.70445900 | 0.99481400  | -0.36830600 |
| C | -4.51407200 | -1.65182900 | -0.08177700 |
| H | -2.43729300 | -2.15338800 | -0.38847200 |
| C | -5.04335200 | 0.70012400  | -0.13508000 |
| H | -3.38058700 | 2.02917600  | -0.47840200 |
| C | -5.45171800 | -0.62678200 | 0.00873600  |
| H | -4.82527200 | -2.68813200 | 0.02872400  |
| H | -5.77263700 | 1.50419700  | -0.06684500 |
| H | -6.49858900 | -0.85897400 | 0.19023200  |
| C | -1.30751500 | 0.30925200  | -0.68425700 |
| H | -1.22079400 | 1.02888900  | -1.51063600 |
| H | -0.76458200 | -0.60439400 | -0.98810200 |
| H | 1.81973400  | 2.66826700  | -0.38895300 |
| C | 0.99874300  | 1.87768500  | 1.85645500  |
| H | 0.44662000  | 2.81694900  | 1.95283200  |
| H | 0.72017700  | 1.22924100  | 2.69357400  |
| H | 2.06985900  | 2.09411600  | 1.94146400  |

|   |            |             |             |
|---|------------|-------------|-------------|
| N | 1.44573700 | -0.03161900 | 0.29227700  |
| C | 2.39022600 | -2.01180100 | 1.17484700  |
| C | 3.47750000 | -0.94515800 | 1.17173100  |
| C | 2.90951700 | 0.09541500  | 0.19979400  |
| C | 1.12522200 | -1.17015700 | 1.17677800  |
| H | 2.44459700 | -2.62036100 | 0.26151700  |
| H | 2.44462100 | -2.68835800 | 2.03235600  |
| H | 4.46755900 | -1.30114100 | 0.87181400  |
| H | 3.56510900 | -0.49145200 | 2.16763900  |
| H | 3.26978200 | 1.10265400  | 0.44761500  |
| H | 0.90531900 | -0.83443100 | 2.20393000  |
| H | 0.24559600 | -1.71314700 | 0.80700700  |
| C | 3.37834600 | -0.18066500 | -1.22685700 |
| O | 4.53379800 | -0.07021400 | -1.58066400 |
| O | 2.41463100 | -0.57268700 | -2.05544400 |
| H | 1.59605500 | -0.55802100 | -1.49114900 |

### EtOH-30

|   |             |             |             |
|---|-------------|-------------|-------------|
| C | -0.79207400 | 1.40591300  | 0.15463300  |
| N | -0.71598200 | 2.35946400  | 1.23782300  |
| H | -0.41697700 | 1.93147200  | 2.10993200  |
| N | 0.56317600  | 0.93932700  | -0.16221200 |
| H | 0.54034900  | 0.00998500  | -0.57384600 |
| C | 2.84859200  | 0.31044900  | 0.28632700  |
| C | 3.06770400  | -1.02701900 | 0.62392800  |
| C | 3.73652500  | 0.94200900  | -0.58804600 |
| C | 4.15768600  | -1.72191600 | 0.10348000  |
| H | 2.37764400  | -1.52427400 | 1.30689300  |
| C | 4.82875400  | 0.25319400  | -1.10796000 |
| H | 3.56462700  | 1.98383100  | -0.85706600 |
| C | 5.04136900  | -1.08139100 | -0.76260900 |
| H | 4.31975000  | -2.76194800 | 0.37722300  |
| H | 5.51756000  | 0.75773700  | -1.78167500 |
| H | 5.89585700  | -1.61942000 | -1.16634600 |
| C | 1.64487400  | 1.03487800  | 0.81872700  |
| H | 1.87981200  | 2.09469400  | 0.97823800  |
| H | 1.39389900  | 0.60986400  | 1.80752000  |
| H | -1.63604800 | 2.76049600  | 1.39901000  |
| C | -1.35183200 | 2.14062900  | -1.05930800 |
| H | -0.70958800 | 3.00159700  | -1.26238000 |
| H | -1.35548000 | 1.51081800  | -1.95449500 |
| H | -2.37286100 | 2.49719500  | -0.87582400 |
| N | -1.72343500 | 0.28344500  | 0.49698100  |
| C | -2.09024700 | -1.80722400 | 1.53792200  |
| C | -1.82535000 | -2.07843600 | 0.06333600  |
| C | -2.02646900 | -0.69416100 | -0.56747600 |
| C | -1.40406900 | -0.46694100 | 1.72946200  |
| H | -3.16856400 | -1.72013600 | 1.72995100  |
| H | -1.69170100 | -2.58016600 | 2.20110200  |
| H | -2.46939600 | -2.83942400 | -0.38718800 |
| H | -0.78225700 | -2.39097500 | -0.07996300 |
| H | -1.39729400 | -0.57863400 | -1.45983300 |
| H | -0.31771900 | -0.62923600 | 1.82680800  |



|   |             |             |             |
|---|-------------|-------------|-------------|
| H | -1.75265200 | 0.07478300  | 2.61547500  |
| C | -3.46935000 | -0.52687800 | -1.04119600 |
| O | -3.93853900 | -1.15225100 | -1.96964500 |
| O | -4.18060800 | 0.34395300  | -0.33472000 |
| H | -3.52876900 | 0.70384400  | 0.32592100  |

**EtOH-31**

|   |             |             |             |
|---|-------------|-------------|-------------|
| C | -0.80990800 | 1.40795400  | 0.12598800  |
| N | -0.86204300 | 2.36680300  | 1.21005000  |
| H | -0.34201000 | 3.20138200  | 0.95177600  |
| N | 0.57097300  | 0.98843000  | -0.18696400 |
| H | 0.58725500  | 0.12326300  | -0.72190800 |
| C | 2.82698300  | 0.27614500  | 0.29632600  |
| C | 2.98194100  | -1.09589900 | 0.51008700  |
| C | 3.78592300  | 0.95647300  | -0.45734700 |
| C | 4.07915500  | -1.77650000 | -0.01318700 |
| H | 2.23499800  | -1.63208500 | 1.09720000  |
| C | 4.88617900  | 0.28116800  | -0.97938700 |
| H | 3.66537800  | 2.02556100  | -0.63014200 |
| C | 5.03503000  | -1.08740300 | -0.75716200 |
| H | 4.19098800  | -2.84371100 | 0.16403700  |
| H | 5.63093700  | 0.82332500  | -1.55754900 |
| H | 5.89569500  | -1.61491800 | -1.16163600 |
| C | 1.61866400  | 0.98931700  | 0.83409200  |
| H | 1.88235600  | 2.02885500  | 1.07470800  |
| H | 1.32632800  | 0.50945400  | 1.78389000  |
| H | -0.44322000 | 2.00791500  | 2.06402400  |
| C | -1.36550500 | 2.09689600  | -1.11602200 |
| H | -0.77606300 | 2.99849700  | -1.31018500 |
| H | -1.28369500 | 1.46392100  | -2.00566300 |
| H | -2.41201400 | 2.38490500  | -0.97195000 |
| N | -1.70475300 | 0.28483600  | 0.49790900  |
| C | -2.12530200 | -1.75166000 | 1.60386600  |
| C | -1.85324900 | -2.08067400 | 0.14167400  |
| C | -2.00456500 | -0.71367700 | -0.54170200 |
| C | -1.39662700 | -0.42948700 | 1.75216400  |
| H | -3.20166100 | -1.62329700 | 1.78193500  |
| H | -1.75609400 | -2.51377300 | 2.29584900  |
| H | -2.51396500 | -2.83792500 | -0.29045700 |
| H | -0.81755800 | -2.42595900 | 0.02284800  |
| H | -1.35347600 | -0.64772800 | -1.42373400 |
| H | -0.31742400 | -0.62893000 | 1.84826100  |
| H | -1.72225400 | 0.15589900  | 2.61915100  |
| C | -3.43472800 | -0.52863500 | -1.04746000 |
| O | -3.89295000 | -1.15092300 | -1.98354900 |
| O | -4.14993900 | 0.34975800  | -0.35427200 |
| H | -3.50456100 | 0.71008100  | 0.31357300  |

**EtOH-32**

|   |             |             |             |
|---|-------------|-------------|-------------|
| C | -0.66432200 | -1.00298300 | 0.18663900  |
| N | -1.00261700 | -1.65004200 | -1.09501900 |
| H | -0.68797000 | -2.61771000 | -1.11714900 |
| N | 0.78131700  | -0.77581000 | 0.30985900  |

|   |             |             |             |
|---|-------------|-------------|-------------|
| H | 0.93584100  | -0.06490500 | 1.02168500  |
| C | 2.98981900  | -0.12769800 | -0.42559900 |
| C | 3.39713600  | 1.20745400  | -0.44038500 |
| C | 3.87718000  | -1.10090400 | 0.04266900  |
| C | 4.66939800  | 1.56745500  | 0.00235700  |
| H | 2.71105800  | 1.97064300  | -0.80792000 |
| C | 5.14811100  | -0.74666900 | 0.48364100  |
| H | 3.56227100  | -2.14386500 | 0.05692600  |
| C | 5.54689600  | 0.59052000  | 0.46508100  |
| H | 4.97435800  | 2.61121400  | -0.01651300 |
| H | 5.83207500  | -1.51340000 | 0.84052500  |
| H | 6.54106300  | 0.86775100  | 0.80781300  |
| C | 1.60494700  | -0.51088200 | -0.86835600 |
| H | 1.66029000  | -1.42648000 | -1.47426700 |
| H | 1.21448500  | 0.28770200  | -1.52443000 |
| H | -0.57451900 | -1.17909600 | -1.88875200 |
| C | -1.06992400 | -1.95935500 | 1.30145000  |
| H | -0.46722700 | -2.86872200 | 1.22162100  |
| H | -0.86642100 | -1.50006200 | 2.27461400  |
| H | -2.12792400 | -2.23941600 | 1.25518100  |
| N | -1.38897100 | 0.24834100  | 0.31878600  |
| C | -2.25856500 | 2.33475800  | -0.39948300 |
| C | -2.91511300 | 1.87989700  | 0.90020200  |
| C | -2.74723900 | 0.36109300  | 0.82303000  |
| C | -1.08781100 | 1.36391400  | -0.58452500 |
| H | -2.97187700 | 2.22638000  | -1.22793700 |
| H | -1.93814100 | 3.38032200  | -0.38075800 |
| H | -3.96039600 | 2.18331600  | 0.99638000  |
| H | -2.35996800 | 2.24716700  | 1.77098900  |
| H | -2.84059400 | -0.09243200 | 1.81963000  |
| H | -0.12683700 | 1.82418000  | -0.30962600 |
| H | -1.01005600 | 1.05114700  | -1.63959000 |
| C | -3.89067900 | -0.24068300 | -0.01316900 |
| O | -5.05108800 | 0.00260200  | 0.26993900  |
| O | -3.59993500 | -1.02538200 | -1.03719800 |
| H | -2.61841200 | -1.27443100 | -1.11704700 |

### EtOH-33

|   |             |             |             |
|---|-------------|-------------|-------------|
| C | -0.69037000 | -0.00680100 | 0.93863300  |
| N | 0.04090100  | -2.32966600 | -1.18193100 |
| H | 0.05691300  | -3.18912600 | -1.72436000 |
| N | 0.59882600  | 0.22105300  | 0.68715500  |
| H | 0.85143400  | 0.93058700  | 0.00898400  |
| C | 2.98290800  | -0.20053100 | 0.53800900  |
| C | 3.43415000  | -0.96482300 | -0.54012000 |
| C | 3.71277700  | 0.92195800  | 0.93615400  |
| C | 4.60317900  | -0.61344700 | -1.21051000 |
| H | 2.86122200  | -1.83990500 | -0.84519900 |
| C | 4.87963600  | 1.27698500  | 0.26454800  |
| H | 3.36572800  | 1.51552700  | 1.78150600  |
| C | 5.32607600  | 0.50839800  | -0.80924800 |
| H | 4.95042800  | -1.21654200 | -2.04593100 |
| H | 5.44429300  | 2.15020200  | 0.58213200  |

|   |             |             |             |
|---|-------------|-------------|-------------|
| H | 6.23930000  | 0.78233700  | -1.33209100 |
| C | 1.70841600  | -0.56515000 | 1.24228500  |
| H | 1.79279500  | -0.36750400 | 2.31933400  |
| H | 1.48948900  | -1.62901100 | 1.09210400  |
| H | 0.51720900  | -1.62986200 | -1.74623300 |
| C | -1.02991500 | -1.05248900 | 1.93677400  |
| H | -0.47334700 | -0.88861000 | 2.86449700  |
| H | -2.09358800 | -1.08640200 | 2.16330300  |
| H | -0.73131700 | -2.02555900 | 1.52821100  |
| N | -1.61764000 | 0.68480800  | 0.30620800  |
| C | -2.66423400 | 1.98557300  | -1.36280900 |
| C | -3.60821300 | 1.80019300  | -0.18072800 |
| C | -3.07365600 | 0.53857400  | 0.49466200  |
| C | -1.30258100 | 1.62406500  | -0.78369900 |
| H | -2.92328900 | 1.28938600  | -2.16930700 |
| H | -2.67545900 | 2.99833600  | -1.77351800 |
| H | -4.65590500 | 1.68296200  | -0.46785500 |
| H | -3.53266300 | 2.65242000  | 0.50654000  |
| H | -3.31387600 | 0.53093700  | 1.56332600  |
| H | -0.78638000 | 2.50255000  | -0.37105400 |
| H | -0.64567700 | 1.13983900  | -1.51871000 |
| C | -3.64328400 | -0.75509800 | -0.14743700 |
| O | -4.86171000 | -0.93575200 | 0.07481900  |
| O | -2.85851500 | -1.47441300 | -0.80977400 |
| H | -0.93945000 | -2.03904600 | -1.11516900 |

#### EtOH-34

|   |             |             |             |
|---|-------------|-------------|-------------|
| N | -0.34262900 | -0.88866000 | 0.40124100  |
| H | -0.85214700 | -1.39171400 | 1.12657200  |
| H | -0.10209200 | 0.82682600  | 0.59948000  |
| C | -2.53455600 | -0.26382300 | -0.47520000 |
| C | -3.50991200 | -1.12274300 | 0.04101600  |
| C | -2.85131000 | 1.08487600  | -0.65241800 |
| C | -4.77243100 | -0.64484200 | 0.38234200  |
| H | -3.27758700 | -2.18083500 | 0.16717500  |
| C | -4.11544500 | 1.56629200  | -0.31738400 |
| H | -2.09818400 | 1.76161800  | -1.05344800 |
| C | -5.07776900 | 0.70332100  | 0.20242500  |
| H | -5.52042100 | -1.32649300 | 0.78078100  |
| H | -4.34937000 | 2.61819500  | -0.46490600 |
| H | -6.06465300 | 1.07876400  | 0.46277100  |
| C | -1.17392600 | -0.80441500 | -0.81702800 |
| H | -0.65678900 | -0.14905400 | -1.52886900 |
| H | -1.27925100 | -1.78444400 | -1.30200900 |
| C | 3.98368300  | 0.39139100  | -0.95143800 |
| C | 3.75939900  | 0.87104000  | 0.47512100  |
| C | 2.25932200  | 0.67824000  | 0.66072200  |
| C | 3.08531600  | -0.82856200 | -1.00310000 |
| H | 3.63787900  | 1.14901300  | -1.66785900 |
| H | 5.02780800  | 0.15521700  | -1.17729500 |
| H | 4.06939700  | 1.90260400  | 0.65916400  |
| H | 4.29572900  | 0.21709600  | 1.17566400  |
| H | 2.02318500  | 0.41860100  | 1.70342300  |

|   |            |             |             |
|---|------------|-------------|-------------|
| H | 3.59833300 | -1.67409000 | -0.50309500 |
| H | 2.83181000 | -1.14157800 | -2.02097500 |
| N | 1.88090900 | -0.40759800 | -0.27285800 |
| C | 1.45124100 | 1.93888400  | 0.35965500  |
| O | 1.94100500 | 3.01991700  | 0.09411700  |
| O | 0.13474500 | 1.79239200  | 0.44327800  |
| C | 1.00422300 | -1.46781000 | 0.24188000  |
| C | 1.43871600 | -2.00848100 | 1.61030000  |
| H | 1.28669100 | -1.29089300 | 2.42398800  |
| H | 0.86410800 | -2.90968600 | 1.85388600  |
| H | 2.50047700 | -2.28282000 | 1.58380900  |
| N | 0.97710600 | -2.53341200 | -0.75931700 |
| H | 1.87328100 | -3.01541100 | -0.78089300 |
| H | 0.29878500 | -3.23191000 | -0.46134600 |

### EtOH-35

|   |             |             |             |
|---|-------------|-------------|-------------|
| N | -0.21965100 | -1.14211400 | 0.56578900  |
| H | -0.61080500 | -1.64273700 | 1.35875200  |
| H | 0.94319600  | 0.66193700  | -1.50420200 |
| C | -2.43989300 | -0.49458500 | -0.23867100 |
| C | -3.65127600 | -1.08489400 | -0.60491500 |
| C | -2.46794900 | 0.74825500  | 0.40381300  |
| C | -4.86501100 | -0.44881900 | -0.34877900 |
| H | -3.64275000 | -2.05733300 | -1.09664900 |
| C | -3.67758300 | 1.38613500  | 0.66228100  |
| H | -1.53189400 | 1.21557200  | 0.70619400  |
| C | -4.88137100 | 0.79044100  | 0.28615900  |
| H | -5.79798900 | -0.92603600 | -0.64050900 |
| H | -3.68135800 | 2.35324300  | 1.16044900  |
| H | -5.82618500 | 1.28887000  | 0.49068600  |
| C | -1.13883600 | -1.18100800 | -0.56450500 |
| H | -0.65661100 | -0.67719500 | -1.41315200 |
| H | -1.35282200 | -2.20478700 | -0.91333600 |
| C | 3.90543000  | 0.74988400  | -0.65450100 |
| C | 3.30596800  | 1.32361400  | 0.62357800  |
| C | 1.84401100  | 0.86929700  | 0.53308700  |
| C | 3.24441500  | -0.61629900 | -0.72547000 |
| H | 3.62193600  | 1.36098100  | -1.52255800 |
| H | 4.99692900  | 0.68481700  | -0.63328000 |
| H | 3.40470600  | 2.40854500  | 0.72682600  |
| H | 3.77013000  | 0.85454400  | 1.50116600  |
| H | 1.39262400  | 0.73409600  | 1.52291200  |
| H | 3.78097500  | -1.31486600 | -0.06045500 |
| H | 3.23841800  | -1.04544100 | -1.73322700 |
| N | 1.86463800  | -0.37366700 | -0.25582800 |
| C | 0.99553300  | 1.92392500  | -0.16853100 |
| O | 0.71086200  | 2.99220800  | 0.33454100  |
| O | 0.60700200  | 1.59161800  | -1.39554300 |
| C | 1.15927800  | -1.52990900 | 0.34700300  |
| C | 1.75055000  | -1.91987300 | 1.70543100  |
| H | 1.62502000  | -1.13015200 | 2.45502000  |
| H | 1.25455600  | -2.82356300 | 2.07862000  |
| H | 2.81867600  | -2.14413200 | 1.61592600  |

|   |            |             |             |
|---|------------|-------------|-------------|
| N | 1.25724600 | -2.62458800 | -0.62361000 |
| H | 2.20925100 | -2.98341300 | -0.66366700 |
| H | 0.68586000 | -3.39795600 | -0.28782300 |

#### EtOH-36

|   |             |             |             |
|---|-------------|-------------|-------------|
| N | -0.42357100 | 1.14477000  | -0.22821600 |
| H | -0.96946800 | 1.92907800  | -0.57202300 |
| H | 1.62996100  | 0.15886500  | 1.81270000  |
| C | -2.51400800 | 0.05749500  | 0.32797300  |
| C | -3.60113900 | 0.92798700  | 0.42638400  |
| C | -2.69377800 | -1.18368700 | -0.28768000 |
| C | -4.84713200 | 0.56835000  | -0.08439300 |
| H | -3.46925100 | 1.89426600  | 0.91391600  |
| C | -3.93760000 | -1.54974400 | -0.79396400 |
| H | -1.85152000 | -1.87186600 | -0.36081200 |
| C | -5.01672000 | -0.67196400 | -0.69554700 |
| H | -5.68646100 | 1.25472800  | 0.00040200  |
| H | -4.06714500 | -2.52252700 | -1.26286700 |
| H | -5.98930700 | -0.95788400 | -1.08921200 |
| C | -1.16209700 | 0.46924100  | 0.84134700  |
| H | -0.61307400 | -0.42271100 | 1.16378300  |
| H | -1.29363600 | 1.09794600  | 1.73924400  |
| C | 3.87019900  | -0.64528200 | -0.96781200 |
| C | 2.66421900  | -1.48341800 | -1.38468300 |
| C | 1.56325300  | -0.90435300 | -0.49268600 |
| C | 3.28366500  | 0.74673200  | -0.70134000 |
| H | 4.30279800  | -1.05616100 | -0.04541000 |
| H | 4.66483700  | -0.62653500 | -1.71923700 |
| H | 2.80413500  | -2.55788600 | -1.24205500 |
| H | 2.39906200  | -1.29741100 | -2.43176800 |
| H | 0.56218200  | -1.12158900 | -0.89106200 |
| H | 3.49174000  | 1.43756500  | -1.53088200 |
| H | 3.72727500  | 1.18788100  | 0.20826700  |
| N | 1.84228300  | 0.51325300  | -0.58089800 |
| C | 1.63288300  | -1.58272800 | 0.88767100  |
| O | 1.56251800  | -2.79683200 | 0.97866400  |
| O | 1.77607500  | -0.83560200 | 1.97104000  |
| C | 0.96484000  | 1.54098500  | -0.05046200 |
| C | 1.18399300  | 2.84022600  | -0.81728100 |
| H | 0.94292900  | 2.70112300  | -1.87699600 |
| H | 0.54510800  | 3.62722800  | -0.40077600 |
| H | 2.22117500  | 3.18004600  | -0.74039800 |
| N | 1.27819600  | 1.72808800  | 1.39923000  |
| H | 2.15008500  | 2.24702600  | 1.49392400  |
| H | 0.56799200  | 2.29646200  | 1.85765200  |

#### EtOH-37

|   |             |             |             |
|---|-------------|-------------|-------------|
| N | 0.01030600  | 1.61045900  | -1.02637800 |
| H | 0.05568800  | 2.54462000  | -1.41070500 |
| H | -3.47742600 | 0.09627100  | -1.16008600 |
| C | 2.20428700  | 0.44270900  | -0.69575300 |
| C | 2.53738800  | 1.27370100  | 0.37317300  |
| C | 3.02002400  | -0.65541100 | -0.98504600 |

|   |             |             |             |
|---|-------------|-------------|-------------|
| C | 3.66974000  | 1.00992200  | 1.14309500  |
| H | 1.90913500  | 2.12852500  | 0.61631000  |
| C | 4.15216200  | -0.91595700 | -0.22012300 |
| H | 2.75700600  | -1.31556900 | -1.81133600 |
| C | 4.47988300  | -0.08310700 | 0.84926300  |
| H | 3.91616900  | 1.66230100  | 1.97748600  |
| H | 4.77478800  | -1.77614200 | -0.45421400 |
| H | 5.36042600  | -0.28983200 | 1.45252100  |
| C | 0.99821500  | 0.68448400  | -1.57059200 |
| H | 0.51840700  | -0.26118400 | -1.84190200 |
| H | 1.31725600  | 1.12829000  | -2.52044400 |
| C | -2.39041700 | -1.13482900 | 1.96011800  |
| C | -0.98843500 | -1.67899700 | 1.72754500  |
| C | -0.55585200 | -0.96017000 | 0.45223800  |
| C | -2.23878200 | 0.34295300  | 1.64659800  |
| H | -3.10010100 | -1.59509700 | 1.26002600  |
| H | -2.76017900 | -1.29742500 | 2.97597900  |
| H | -0.94439700 | -2.76365700 | 1.60303100  |
| H | -0.32845900 | -1.39991600 | 2.55922000  |
| H | 0.53414300  | -0.86970500 | 0.40413200  |
| H | -1.90192300 | 0.90883300  | 2.52566100  |
| H | -3.15310300 | 0.79521700  | 1.25185900  |
| N | -1.16814900 | 0.37772200  | 0.61573800  |
| C | -1.04633900 | -1.70382700 | -0.81745400 |
| O | -0.45633500 | -2.78847700 | -1.02548300 |
| O | -1.94618900 | -1.16650900 | -1.50663800 |
| C | -0.91830300 | 1.47320500  | -0.07274800 |
| C | -1.73587500 | 2.68859900  | 0.21268100  |
| H | -1.70309700 | 2.93555100  | 1.27804500  |
| H | -1.38215800 | 3.55125500  | -0.35425000 |
| H | -2.77867700 | 2.47777900  | -0.06237700 |
| N | -4.25690300 | 0.73502100  | -0.96821600 |
| H | -4.99071400 | 0.18329100  | -0.53116900 |
| H | -4.62554900 | 1.03441900  | -1.86680000 |

#### **EtOH-38**

|   |             |             |             |
|---|-------------|-------------|-------------|
| N | 0.70599000  | -0.13155400 | 0.21089800  |
| H | 0.88590900  | 0.20130200  | -0.73544900 |
| C | 3.10824500  | -0.45934200 | 0.24559900  |
| C | 3.90115900  | -1.06176700 | -0.73136300 |
| C | 3.56411500  | 0.71128000  | 0.86065300  |
| C | 5.13183800  | -0.50965900 | -1.08692300 |
| H | 3.55265900  | -1.97336400 | -1.21556500 |
| C | 4.78945400  | 1.26640700  | 0.50744800  |
| H | 2.94649400  | 1.18423100  | 1.62338400  |
| C | 5.57730100  | 0.65556400  | -0.46926300 |
| H | 5.74089300  | -0.99128000 | -1.84841600 |
| H | 5.13443300  | 2.17487200  | 0.99599900  |
| H | 6.53646100  | 1.08749600  | -0.74513000 |
| C | 1.77594500  | -1.04114600 | 0.62806100  |
| H | 1.73136400  | -1.15324900 | 1.71924100  |
| H | 1.67076300  | -2.04791500 | 0.19073500  |
| C | -2.25061300 | 2.67167500  | -0.54107500 |

|   |             |             |             |
|---|-------------|-------------|-------------|
| C | -3.48128300 | 1.76699200  | -0.42017900 |
| C | -2.94192700 | 0.46206300  | 0.19675700  |
| C | -1.10718200 | 1.83891300  | 0.01954100  |
| H | -2.05836300 | 2.92184900  | -1.58979200 |
| H | -2.36176100 | 3.61308500  | 0.00543900  |
| H | -3.92080700 | 1.56189800  | -1.40288100 |
| H | -4.27341300 | 2.18280000  | 0.20756500  |
| H | -3.01766500 | 0.55117000  | 1.29793400  |
| H | -0.98154800 | 2.02031600  | 1.10332900  |
| H | -0.15373700 | 2.06063100  | -0.46138300 |
| N | -1.52913900 | 0.44437600  | -0.22497400 |
| C | -3.88927900 | -0.66852400 | -0.17284400 |
| O | -5.06842500 | -0.55830800 | 0.10834900  |
| O | -3.45176000 | -1.74258700 | -0.80868300 |
| C | -0.64545200 | -0.59799900 | 0.31598500  |
| C | -0.97201200 | -1.03923300 | 1.73028100  |
| H | -1.97931500 | -1.46072200 | 1.79087100  |
| H | -0.28264200 | -1.81846500 | 2.06326100  |
| H | -0.90193500 | -0.18726300 | 2.41481100  |
| O | -0.84789700 | -1.78669200 | -0.50168300 |
| H | -0.46441600 | -1.59854600 | -1.37206000 |
| H | -2.45852300 | -1.78923500 | -0.82329200 |

#### EtOH-40

|   |             |             |             |
|---|-------------|-------------|-------------|
| C | 2.20982600  | 2.27679600  | 0.82738800  |
| C | 1.97211700  | 1.98636800  | -0.64938400 |
| C | 2.05939500  | 0.46653000  | -0.71212400 |
| C | 1.42363500  | 1.16685500  | 1.50477400  |
| H | 3.27929400  | 2.18484800  | 1.06111500  |
| H | 1.87886400  | 3.27274200  | 1.13584200  |
| H | 2.68744400  | 2.46790700  | -1.32030100 |
| H | 0.96160700  | 2.30478500  | -0.93725300 |
| H | 1.43424600  | 0.05201100  | -1.51636100 |
| H | 0.35360800  | 1.43078100  | 1.57320400  |
| H | 1.78201800  | 0.95329100  | 2.51959100  |
| N | 1.62583800  | 0.01335200  | 0.62297200  |
| C | 3.48753400  | -0.01931900 | -0.98660400 |
| O | 4.39878100  | 0.70326800  | -1.33636400 |
| O | 3.69211200  | -1.32716400 | -0.83414300 |
| C | 0.74194700  | -1.12022100 | 0.80114300  |
| C | 0.98560600  | -1.77127400 | 2.15403400  |
| H | 0.37137200  | -2.67361200 | 2.26167400  |
| H | 2.04057500  | -2.04892100 | 2.23592700  |
| H | 0.72750000  | -1.08988700 | 2.96947400  |
| N | -0.65667800 | -0.78169300 | 0.71053500  |
| H | -1.24092300 | -1.54641600 | 1.04058400  |
| C | -2.64048200 | 0.00436700  | -0.44134600 |
| C | -3.55617900 | -0.84330900 | -1.06592800 |
| C | -3.12003300 | 1.07807400  | 0.31563900  |
| C | -4.92783200 | -0.62350700 | -0.94069700 |
| H | -3.19005500 | -1.68141600 | -1.65821900 |
| C | -4.48688100 | 1.30196100  | 0.44258000  |
| H | -2.40758200 | 1.74204000  | 0.80530600  |

|   |             |             |             |
|---|-------------|-------------|-------------|
| C | -5.39526700 | 0.44927700  | -0.18641500 |
| H | -5.63058600 | -1.29090300 | -1.43426900 |
| H | -4.84617500 | 2.14413700  | 1.02966800  |
| H | -6.46426700 | 0.62423400  | -0.08980700 |
| C | -1.16219100 | -0.24349600 | -0.54867400 |
| H | -0.65191300 | 0.71028400  | -0.74269200 |
| H | -0.95657600 | -0.90575500 | -1.40664700 |
| O | 1.15378500  | -2.03395700 | -0.24003600 |
| H | 2.85414100  | -1.77372800 | -0.56499200 |
| H | 0.72869000  | -2.88982400 | -0.09836800 |

#### EtOH-42

|   |             |             |             |
|---|-------------|-------------|-------------|
| C | -0.61823900 | -0.67789600 | 0.25836900  |
| N | 0.73463100  | -0.19256200 | 0.28306300  |
| H | 0.90384800  | 0.49643500  | -0.44646700 |
| C | 3.13879400  | -0.48504700 | 0.13003800  |
| C | 3.87128000  | -0.60483200 | -1.05128200 |
| C | 3.64268500  | 0.31316900  | 1.16183500  |
| C | 5.09075100  | 0.05532700  | -1.20094800 |
| H | 3.48511500  | -1.22580500 | -1.85893700 |
| C | 4.85745600  | 0.97482100  | 1.01590900  |
| H | 3.07248700  | 0.40915300  | 2.08522600  |
| C | 5.58520700  | 0.84664100  | -0.16777300 |
| H | 5.65286700  | -0.04942800 | -2.12603100 |
| H | 5.24088400  | 1.58935600  | 1.82720700  |
| H | 6.53654500  | 1.36110700  | -0.28154000 |
| C | 1.81715100  | -1.18185800 | 0.29261200  |
| H | 1.79881900  | -1.70556100 | 1.25732800  |
| H | 1.70115200  | -1.94534100 | -0.49400900 |
| C | -0.91690000 | -1.56138200 | 1.45171300  |
| H | -0.79516800 | -0.99177100 | 2.37738500  |
| H | -1.93584700 | -1.95619300 | 1.40211800  |
| H | -0.24320600 | -2.42063500 | 1.46208900  |
| N | -1.50812700 | 0.44349500  | 0.21284200  |
| C | -3.20788600 | 1.92180400  | 0.42224300  |
| C | -2.87742200 | 0.45534800  | 0.67964100  |
| C | -1.34206200 | 1.49341300  | -0.79173900 |
| H | -4.27508900 | 2.12683000  | 0.32265000  |
| H | -2.77216300 | 2.55179400  | 1.21085200  |
| H | -2.95350100 | 0.22159500  | 1.74957000  |
| H | -0.53312000 | 2.18505000  | -0.50049100 |
| H | -1.14086600 | 1.10415700  | -1.80333300 |
| C | -3.91258300 | -0.41985900 | -0.04201700 |
| O | -5.08524500 | -0.34691100 | 0.26610700  |
| O | -3.51352700 | -1.23163000 | -1.01010200 |
| O | -0.85010400 | -1.55496800 | -0.90744400 |
| H | -2.52628400 | -1.29868600 | -1.09133300 |
| H | -0.35580900 | -1.21996900 | -1.66897100 |
| O | -2.57807400 | 2.16269500  | -0.82934600 |

#### EtOH-44

|   |             |            |             |
|---|-------------|------------|-------------|
| N | -0.41608900 | 1.09004100 | -0.31020800 |
| H | -0.97429900 | 1.91478300 | -0.51284100 |



|   |             |             |             |
|---|-------------|-------------|-------------|
| H | 1.69981700  | 0.07968400  | 1.78612200  |
| C | -2.53471500 | 0.01593600  | 0.21857700  |
| C | -3.62885300 | 0.38759800  | 0.99989400  |
| C | -2.76296700 | -0.63078400 | -1.00071500 |
| C | -4.92993800 | 0.11322900  | 0.57870600  |
| H | -3.46004100 | 0.89394800  | 1.94955900  |
| C | -4.05882300 | -0.90581500 | -1.42464800 |
| H | -1.91135900 | -0.91748700 | -1.61668400 |
| C | -5.14720300 | -0.53427900 | -0.63408100 |
| H | -5.77336500 | 0.40812300  | 1.19886100  |
| H | -4.22243200 | -1.41262900 | -2.37312000 |
| H | -6.16060000 | -0.74965000 | -0.96484100 |
| C | -1.13134400 | 0.28885100  | 0.68588100  |
| H | -0.61592500 | -0.67105600 | 0.82262200  |
| H | -1.15705700 | 0.77160700  | 1.67462900  |
| C | 3.97032900  | -0.54455500 | -0.81960300 |
| C | 2.83103800  | -1.41560200 | -1.34206800 |
| C | 1.64714600  | -0.91229000 | -0.51062600 |
| C | 3.31172700  | 0.81537800  | -0.56971700 |
| H | 4.35406400  | -0.95996600 | 0.12191800  |
| H | 4.81366200  | -0.47612600 | -1.51240000 |
| H | 3.00455000  | -2.48839000 | -1.22555600 |
| H | 2.62723100  | -1.20498400 | -2.39817600 |
| H | 0.68698300  | -1.15958400 | -0.98375100 |
| H | 3.52274800  | 1.51903400  | -1.38713200 |
| H | 3.68326400  | 1.27172400  | 0.36306000  |
| N | 1.87631800  | 0.51564400  | -0.51413900 |
| C | 1.66764800  | -1.62351200 | 0.85160900  |
| O | 1.58759000  | -2.83396500 | 0.92835000  |
| O | 1.80510100  | -0.89057400 | 1.95424500  |
| C | 0.94248900  | 1.49989600  | -0.04842700 |
| C | 1.19267900  | 2.84071000  | -0.71746200 |
| H | 1.05687900  | 2.74838400  | -1.79930900 |
| H | 0.49122300  | 3.58408300  | -0.32519000 |
| H | 2.20800200  | 3.20182300  | -0.52832700 |
| H | 1.76671100  | 2.36065200  | 1.57409400  |
| O | 1.09769000  | 1.68424700  | 1.40527600  |

#### EtOH-Product

|   |             |             |             |
|---|-------------|-------------|-------------|
| N | -1.59510300 | -0.62256200 | -0.55284700 |
| H | -1.63706900 | -0.63419400 | -1.56311300 |
| C | 0.82221100  | -0.51790900 | 0.01384400  |
| C | 2.02923900  | -1.21734400 | -0.05182100 |
| C | 0.85169900  | 0.87767200  | 0.04705900  |
| C | 3.24476300  | -0.53723200 | -0.07618400 |
| H | 2.01491200  | -2.30628900 | -0.08710000 |
| C | 2.06530900  | 1.56071900  | 0.01892200  |
| H | -0.08252100 | 1.43533600  | 0.09183900  |
| C | 3.26590100  | 0.85537700  | -0.04092000 |
| H | 4.17607800  | -1.09649200 | -0.13051000 |
| H | 2.07314300  | 2.64800700  | 0.04422200  |
| H | 4.21320300  | 1.38889000  | -0.06494800 |
| C | -0.47791900 | -1.27972300 | 0.09433300  |

|   |             |             |             |
|---|-------------|-------------|-------------|
| H | -0.76387200 | -1.41888400 | 1.14413300  |
| H | -0.35029800 | -2.27879400 | -0.33930700 |
| C | -2.55446300 | 0.05142200  | 0.12905100  |
| C | -3.63570200 | 0.68205200  | -0.70360200 |
| H | -3.54944900 | 0.46931700  | -1.77243900 |
| H | -4.60690600 | 0.32871800  | -0.34478100 |
| H | -3.60693700 | 1.76585400  | -0.55375800 |
| O | -2.54759900 | 0.15078200  | 1.35769900  |

**EtOH-TS3-IM1**

|   |             |             |             |
|---|-------------|-------------|-------------|
| C | 1.45141800  | 2.10510800  | 0.95940000  |
| C | 2.06476200  | 1.38167200  | -0.23655300 |
| C | 1.08155100  | 0.25050600  | -0.55753100 |
| C | -0.03330700 | 1.92585500  | 0.72010800  |
| H | 1.73968900  | 1.61992200  | 1.90085300  |
| H | 1.73956100  | 3.15808300  | 1.02066900  |
| H | 3.06231200  | 0.98254400  | -0.03763700 |
| H | 2.13621800  | 2.05925000  | -1.09432900 |
| H | 0.74789100  | 0.32109500  | -1.60332500 |
| H | -0.38131600 | 2.56086800  | -0.10564500 |
| H | -0.66846700 | 2.08572300  | 1.59440400  |
| N | -0.15029100 | 0.51359500  | 0.26646900  |
| C | 1.62158900  | -1.16841000 | -0.37128500 |
| O | 2.80439500  | -1.38416600 | -0.17163300 |
| O | 0.74295700  | -2.13055700 | -0.50686500 |
| H | -0.24559600 | -1.76961500 | -0.65151100 |
| C | -1.60181900 | 0.08210700  | -0.56511500 |
| C | -2.69494000 | 0.64485100  | 0.32277000  |
| H | -2.72151100 | 1.73922300  | 0.32432200  |
| H | -3.64741700 | 0.27889600  | -0.07522000 |
| H | -2.59303500 | 0.28497600  | 1.35140400  |
| N | -1.49809400 | 0.74559900  | -1.81427600 |
| H | -1.51832600 | 0.08668200  | -2.58325900 |
| H | -2.15967600 | 1.49882800  | -1.95683900 |
| O | -1.54721300 | -1.23405300 | -0.62384900 |
| H | -0.17882400 | -0.10279400 | 1.09464200  |
| O | -1.12898600 | -1.60118500 | 2.11084700  |
| H | -0.61135500 | -2.37744200 | 2.35088200  |
| H | -1.46619900 | -1.77105000 | 1.20647000  |

**EtOH-TS3-5b-H<sub>2</sub>O**

|   |             |            |             |
|---|-------------|------------|-------------|
| C | 0.52988400  | 2.66207400 | 0.17383700  |
| C | 1.68614600  | 1.70019700 | -0.03016200 |
| C | 0.98903700  | 0.42121700 | -0.45710100 |
| C | -0.49123300 | 1.80081900 | 0.89132200  |
| H | 0.80058600  | 3.54354800 | 0.76088500  |
| H | 0.13744200  | 3.00962900 | -0.79076900 |
| H | 2.22361100  | 1.52503500 | 0.91009100  |
| H | 2.41471200  | 2.02361800 | -0.77847500 |
| H | 0.71148100  | 0.48421500 | -1.51724300 |
| H | -1.53339100 | 2.08520300 | 0.74325500  |
| H | -0.30123700 | 1.75567200 | 1.96857100  |
| N | -0.29295700 | 0.40315200 | 0.34896500  |

|   |             |             |             |
|---|-------------|-------------|-------------|
| C | 1.86773800  | -0.82610100 | -0.29694900 |
| O | 2.96025600  | -0.77683300 | 0.22267900  |
| O | 1.42105100  | -1.94586900 | -0.84839300 |
| H | 0.45687800  | -1.86597800 | -1.06285600 |
| C | -1.53714500 | -0.21816500 | -0.36570800 |
| O | -1.18538400 | -1.54624200 | -0.58831200 |
| H | -0.19896800 | -0.32763500 | 1.15992900  |
| O | -0.56482200 | -1.69036200 | 1.80088700  |
| H | 0.14076200  | -2.24743200 | 2.14137800  |
| H | -0.97066000 | -1.89225200 | 0.38466300  |
| C | -1.84678100 | 0.47475400  | -1.66849000 |
| H | -2.78906600 | 0.07238700  | -2.05323600 |
| H | -1.96656600 | 1.55356500  | -1.52885500 |
| H | -1.08268300 | 0.28490000  | -2.42582600 |
| N | -2.60757700 | -0.04506500 | 0.56843200  |
| H | -3.49447100 | -0.25931600 | 0.12402400  |
| H | -2.47938200 | -0.66609400 | 1.36729600  |

#### EtOH-TSIM1-5a

|   |             |             |             |
|---|-------------|-------------|-------------|
| C | 0.89808800  | 2.62258900  | 0.08389800  |
| C | 1.86589300  | 1.43671200  | 0.11110400  |
| C | 1.05393900  | 0.27200900  | -0.44627500 |
| C | -0.48598800 | 2.00360100  | -0.12145400 |
| H | 0.94561100  | 3.19485500  | 1.01451000  |
| H | 1.12752700  | 3.31238800  | -0.73348000 |
| H | 2.17370500  | 1.19926100  | 1.13744100  |
| H | 2.77489800  | 1.59764200  | -0.47155300 |
| H | 0.97339400  | 0.36401600  | -1.54253100 |
| H | -0.84129700 | 2.14365000  | -1.15031400 |
| H | -1.24064700 | 2.38938000  | 0.56806900  |
| N | -0.31285800 | 0.54045800  | 0.10667400  |
| C | 1.74717900  | -1.06894100 | -0.20201400 |
| O | 2.96209900  | -1.10382500 | -0.26591000 |
| O | 1.04633900  | -2.16679500 | -0.01770700 |
| H | 0.04152400  | -2.00302400 | 0.07433300  |
| C | -1.47890000 | -0.33829500 | -0.42144500 |
| C | -2.80106700 | 0.33837000  | -0.10804300 |
| H | -2.97414800 | 1.23109300  | -0.71537200 |
| H | -3.59062500 | -0.38922300 | -0.31974800 |
| H | -2.86209600 | 0.60021300  | 0.95256900  |
| N | -1.32506200 | -0.50855300 | -1.83351200 |
| H | -0.76685900 | -1.32878500 | -2.05486600 |
| H | -2.22654000 | -0.62053100 | -2.28565000 |
| O | -1.37565200 | -1.52653700 | 0.29772900  |
| H | -0.36622400 | 0.25623700  | 1.28350400  |
| O | -0.78697700 | -0.42468200 | 2.32416500  |
| H | -0.07785900 | -0.81486100 | 2.84775200  |
| H | -1.18626000 | -1.17719600 | 1.40235400  |

#### EtOH-TS5a-6a

|   |             |            |             |
|---|-------------|------------|-------------|
| C | -1.36492400 | 1.94130300 | -0.59493000 |
| C | -1.80274000 | 1.29484900 | 0.71472400  |
| C | -0.90523900 | 0.05974400 | 0.77623800  |

|   |             |             |             |
|---|-------------|-------------|-------------|
| C | 0.14858800  | 1.73400600  | -0.61642800 |
| H | -1.82935700 | 1.41577900  | -1.44000700 |
| H | -1.63862100 | 2.99694100  | -0.67152000 |
| H | -2.86198300 | 1.03127400  | 0.74702600  |
| H | -1.57456800 | 1.94623900  | 1.56666000  |
| H | -0.80783200 | -0.30229100 | 1.80868500  |
| H | 0.69015300  | 2.61681000  | -0.25152900 |
| H | 0.51089500  | 1.50946000  | -1.62970600 |
| N | 0.36518800  | 0.60066800  | 0.29722500  |
| C | -1.50714000 | -1.08987900 | -0.05815600 |
| O | -2.65149300 | -1.44935000 | 0.20914100  |
| O | -0.79429100 | -1.63087700 | -0.99485700 |
| H | 0.33449300  | -1.35789500 | -1.11069000 |
| C | 1.55064600  | -0.08073900 | 0.32663300  |
| C | 2.79496600  | 0.72593600  | 0.08539900  |
| H | 2.91938000  | 1.43684300  | 0.90914500  |
| H | 3.66522700  | 0.06596700  | 0.05084900  |
| H | 2.74989400  | 1.28583800  | -0.85095800 |
| N | 1.68277200  | -1.00645600 | 1.34822900  |
| H | 0.90456400  | -1.64262600 | 1.47509700  |
| H | 2.54963700  | -1.52752600 | 1.28967900  |
| O | 1.54592300  | -1.11288700 | -1.12618700 |
| H | 1.76634600  | -0.60071000 | -1.91655800 |

#### EtOH-TS6a-6c

|   |             |             |             |
|---|-------------|-------------|-------------|
| C | -0.94823600 | 2.13720200  | -0.35893700 |
| C | -1.47660500 | 1.30352300  | 0.80317100  |
| C | -0.71226800 | -0.00581500 | 0.68183800  |
| C | 0.53862100  | 1.82379100  | -0.34879700 |
| H | -1.39635800 | 1.79579400  | -1.30098000 |
| H | -1.14473100 | 3.20738400  | -0.25351500 |
| H | -2.55502900 | 1.13571900  | 0.76129200  |
| H | -1.23169400 | 1.78657400  | 1.75724700  |
| H | -0.48223300 | -0.44982500 | 1.66232900  |
| H | 1.06988700  | 2.44447100  | 0.38782800  |
| H | 1.01765100  | 1.95277800  | -1.32442000 |
| N | 0.56955900  | 0.41178300  | 0.06434600  |
| C | -1.42625000 | -1.10063500 | -0.14295100 |
| O | -2.55540900 | -0.90999200 | -0.59164500 |
| O | -0.75695000 | -2.19719800 | -0.27028500 |
| C | 1.66663400  | -0.35425500 | 0.07893700  |
| C | 2.97596500  | 0.26416900  | -0.27577500 |
| H | 3.13814500  | 1.19637200  | 0.27381400  |
| H | 3.79409800  | -0.42578100 | -0.06096200 |
| H | 3.00125400  | 0.50095100  | -1.34551600 |
| N | 1.53931800  | -1.62272300 | 0.38924300  |
| H | 0.42247600  | -2.05607300 | 0.15134100  |
| H | 2.39610300  | -2.16213800 | 0.38695300  |

#### EtOH-TSIM2

|   |            |            |             |
|---|------------|------------|-------------|
| C | 0.73494400 | 2.14813900 | 0.40201800  |
| C | 1.28280900 | 1.41003000 | -0.81394600 |
| C | 0.67279700 | 0.01729000 | -0.65724000 |

|   |             |             |             |
|---|-------------|-------------|-------------|
| C | -0.70570800 | 1.66569200  | 0.46322300  |
| H | 1.27599300  | 1.84053800  | 1.30790700  |
| H | 0.80589600  | 3.23598100  | 0.32075200  |
| H | 2.37346200  | 1.37608300  | -0.86711300 |
| H | 0.90526500  | 1.86492700  | -1.73741900 |
| H | 0.50739800  | -0.48608600 | -1.62034000 |
| H | -1.34396300 | 2.25895200  | -0.20935000 |
| H | -1.13151000 | 1.71361400  | 1.47114000  |
| N | -0.61140800 | 0.27577200  | -0.00810400 |
| C | 1.59159700  | -0.90962500 | 0.13498800  |
| O | 2.77639300  | -1.00289400 | -0.10245100 |
| O | 1.04086400  | -1.64107600 | 1.10537400  |
| C | -1.69381500 | -0.54450900 | -0.22076400 |
| C | -3.01892500 | -0.00725000 | 0.23155500  |
| H | -3.26127400 | 0.92985300  | -0.28214600 |
| H | -3.81039000 | -0.73155800 | 0.02813600  |
| H | -3.01041900 | 0.20350100  | 1.30683600  |
| N | -1.49277700 | -1.70776900 | -0.74461400 |
| H | 0.07702900  | -1.50588800 | 1.11570600  |
| H | -2.37844500 | -2.20278200 | -0.82746700 |

#### EtOH-TS6c-6d

|   |             |             |             |
|---|-------------|-------------|-------------|
| C | 0.85688200  | 2.01559800  | 0.69123200  |
| C | 1.21265800  | 1.44799900  | -0.67728700 |
| C | 0.57603700  | 0.05380300  | -0.63616000 |
| C | -0.57560200 | 1.54371800  | 0.86136500  |
| H | 1.50309500  | 1.58965700  | 1.47123300  |
| H | 0.94330400  | 3.10467200  | 0.74274300  |
| H | 2.28483000  | 1.40804800  | -0.89024800 |
| H | 0.72653900  | 2.03620700  | -1.46515400 |
| H | 0.24431500  | -0.26863800 | -1.63148600 |
| H | -1.25703100 | 2.17451000  | 0.27182500  |
| H | -0.92028400 | 1.52741300  | 1.90088100  |
| N | -0.55978700 | 0.16459900  | 0.30869300  |
| C | 1.56551100  | -0.99438900 | -0.13651100 |
| O | 2.56575300  | -1.30285300 | -0.75031300 |
| O | 1.25224500  | -1.54134000 | 1.03356800  |
| C | -1.82776400 | -0.27011500 | -0.23108200 |
| C | -2.38006400 | -1.48715000 | 0.43277300  |
| H | -2.48158300 | -1.30633300 | 1.50974800  |
| H | -3.34857000 | -1.77987900 | 0.01920700  |
| H | -1.67634800 | -2.32207500 | 0.31903100  |
| N | -2.34045700 | 0.38708900  | -1.18903000 |
| H | 0.40251000  | -1.09880700 | 1.29449800  |
| H | -3.22899600 | -0.02983400 | -1.47192600 |

#### EtOH-TS6d-6b

|   |             |             |             |
|---|-------------|-------------|-------------|
| C | 1.35900400  | 1.92223100  | 0.39668400  |
| C | 1.93975300  | 1.07650700  | -0.73202200 |
| C | 0.95525700  | -0.08929500 | -0.80793500 |
| C | -0.14801400 | 1.83349500  | 0.18350600  |
| H | 1.62559900  | 1.48461500  | 1.36769000  |
| H | 1.71311900  | 2.95641100  | 0.38947200  |

|   |             |             |             |
|---|-------------|-------------|-------------|
| H | 2.96245000  | 0.73675800  | -0.55023500 |
| H | 1.92076000  | 1.62845200  | -1.67973300 |
| H | 0.96972100  | -0.57265600 | -1.79088700 |
| H | -0.53054300 | 2.64231700  | -0.45327900 |
| H | -0.70343900 | 1.85777300  | 1.12290200  |
| N | -0.32600000 | 0.56061700  | -0.54832600 |
| C | 1.29418800  | -1.17270300 | 0.24053500  |
| O | 2.32108700  | -1.82396900 | 0.03443400  |
| O | 0.52318600  | -1.33961500 | 1.25537100  |
| C | -1.51843000 | -0.00089600 | -0.79569800 |
| C | -1.61687500 | -1.03850300 | -1.86545500 |
| H | -2.66426800 | -1.22210800 | -2.11468100 |
| H | -1.07731300 | -0.74520300 | -2.77054900 |
| H | -1.19101800 | -1.98448400 | -1.50800700 |
| N | -2.53325700 | 0.34555800  | -0.03338000 |
| H | -0.51036100 | -0.73836600 | 1.65823400  |
| H | -3.40396300 | -0.09543200 | -0.31370800 |
| O | -1.49661200 | -0.32399500 | 2.08506600  |
| H | -2.11966200 | 0.14632300  | 1.17471600  |
| H | -1.34686700 | 0.27799400  | 2.82335000  |

#### EtOH-TS6a-7

|   |             |             |             |
|---|-------------|-------------|-------------|
| N | -0.40066700 | 0.81315500  | 0.05865700  |
| H | -0.12106800 | -0.18566400 | 0.13270500  |
| H | -0.63779700 | 1.16963700  | 0.98443500  |
| C | -2.78108100 | 0.27812100  | -0.32270400 |
| C | -2.83753000 | -1.11903000 | -0.28227900 |
| C | -3.86486200 | 1.01753600  | 0.15249400  |
| C | -3.95950500 | -1.76365700 | 0.22800100  |
| H | -1.99062100 | -1.69929500 | -0.64988800 |
| C | -4.99179500 | 0.37281600  | 0.66077500  |
| H | -3.82713000 | 2.10572200  | 0.12087200  |
| C | -5.04026200 | -1.01804100 | 0.70011500  |
| H | -3.99466900 | -2.85017700 | 0.25379500  |
| H | -5.83223400 | 0.95912100  | 1.02479500  |
| H | -5.91872400 | -1.52201900 | 1.09607700  |
| C | -1.54926400 | 0.96285300  | -0.84932300 |
| H | -1.74393000 | 2.03145500  | -1.00661600 |
| H | -1.25574600 | 0.52817000  | -1.81322700 |
| C | 3.14647800  | -0.43992500 | 1.98961200  |
| C | 3.88802300  | -0.76905300 | 0.69934200  |
| C | 2.83577100  | -0.48252800 | -0.37375800 |
| C | 2.36702200  | 0.82002100  | 1.63045900  |
| H | 2.45151300  | -1.25225100 | 2.23800900  |
| H | 3.80742300  | -0.28698500 | 2.84734700  |
| H | 4.25234100  | -1.79811600 | 0.64730300  |
| H | 4.74207000  | -0.09219000 | 0.56816300  |
| H | 3.31377700  | -0.22448300 | -1.32864100 |
| H | 2.93880900  | 1.72929700  | 1.86782200  |
| H | 1.40895700  | 0.87639400  | 2.16538800  |
| N | 2.17134900  | 0.70290800  | 0.18033500  |
| C | 1.94305700  | -1.72416400 | -0.62855900 |
| O | 2.53185800  | -2.68677100 | -1.16489100 |

|   |            |             |             |
|---|------------|-------------|-------------|
| O | 0.72493900 | -1.67698400 | -0.29389200 |
| C | 1.27851800 | 1.48363100  | -0.49703700 |
| C | 1.14786200 | 2.91280900  | -0.04245500 |
| H | 2.07810200 | 3.44000800  | -0.28131400 |
| H | 0.32263000 | 3.41157700  | -0.55973800 |
| H | 0.97540500 | 2.98931500  | 1.03331700  |
| N | 1.30449700 | 1.34439400  | -1.87359600 |
| H | 1.26648900 | 0.39968200  | -2.23801600 |
| H | 0.68918000 | 1.96930700  | -2.37819000 |

**EtOH-TS6a-8**

|   |             |             |             |
|---|-------------|-------------|-------------|
| C | -2.56871200 | 0.13206300  | 2.48970300  |
| C | -2.82936200 | -1.07965300 | 1.60457800  |
| C | -1.81143200 | -0.88974700 | 0.50228100  |
| C | -2.28565800 | 1.26156900  | 1.49958900  |
| H | -3.39950200 | 0.37695100  | 3.15758600  |
| H | -1.68442400 | -0.05035600 | 3.11414400  |
| H | -3.83670700 | -1.05787900 | 1.16999700  |
| H | -2.70050200 | -2.03441900 | 2.12374000  |
| H | -0.80522300 | -1.09930500 | 0.91484700  |
| H | -1.49377300 | 1.92866900  | 1.86473200  |
| H | -3.17985500 | 1.87299800  | 1.31941400  |
| N | -1.90761300 | 0.56944100  | 0.24955000  |
| C | -1.93618400 | -1.78999900 | -0.74141500 |
| O | -2.98716900 | -2.43450000 | -0.90971800 |
| O | -0.91433800 | -1.78136100 | -1.49473500 |
| C | -1.48769000 | 1.25059100  | -0.86029800 |
| C | -1.46939900 | 2.74937600  | -0.75086900 |
| H | -1.03154700 | 3.18295200  | -1.65395600 |
| H | -2.49581700 | 3.12028300  | -0.65933500 |
| H | -0.89706700 | 3.09707600  | 0.11127300  |
| N | -1.89635300 | 0.81404900  | -2.11037700 |
| H | -1.73922900 | -0.17396700 | -2.30206800 |
| H | -1.56397500 | 1.39647200  | -2.86983800 |
| N | 0.39595200  | 0.84258200  | -0.92639200 |
| H | 0.31335900  | -0.16349300 | -1.14249000 |
| H | 0.82709700  | 1.29639800  | -1.73263300 |
| C | 2.51818100  | 0.38089900  | 0.27248800  |
| C | 2.57561600  | -1.01670200 | 0.28149400  |
| C | 3.70658700  | 1.10965900  | 0.22426700  |
| C | 3.80101500  | -1.67312800 | 0.24130200  |
| H | 1.65205700  | -1.59654200 | 0.31863300  |
| C | 4.93679100  | 0.45388900  | 0.18858400  |
| H | 3.66827500  | 2.19807700  | 0.21710900  |
| C | 4.98531400  | -0.93731600 | 0.19618100  |
| H | 3.83407800  | -2.75981200 | 0.24984800  |
| H | 5.85676400  | 1.03266600  | 0.15416300  |
| H | 5.94404700  | -1.44954700 | 0.16774000  |
| C | 1.18309800  | 1.07440700  | 0.29549600  |
| H | 1.31210200  | 2.15550700  | 0.42202500  |
| H | 0.57900800  | 0.71621800  | 1.14093800  |

**EtOH-TS6a-11**

|   |             |             |             |
|---|-------------|-------------|-------------|
| C | -1.43322000 | 1.25365100  | -0.78019900 |
| N | -1.65706800 | 2.12978800  | 0.27712100  |
| H | -2.25011400 | 2.91517900  | 0.03409600  |
| N | 0.45689000  | 1.01981200  | -0.74427000 |
| H | 0.77912100  | 0.67002300  | -1.64780600 |
| H | 0.86116700  | 1.95404900  | -0.60316700 |
| C | 2.32124700  | -0.31316800 | 0.17619400  |
| C | 2.61989500  | -1.56652300 | -0.36242600 |
| C | 3.36781200  | 0.54552100  | 0.52501800  |
| C | 3.94359200  | -1.95878600 | -0.55011100 |
| H | 1.80569000  | -2.24077600 | -0.62964500 |
| C | 4.69071600  | 0.15588800  | 0.33953800  |
| H | 3.13922500  | 1.52438200  | 0.94707200  |
| C | 4.98070100  | -1.09804100 | -0.19850000 |
| H | 4.16415800  | -2.93877600 | -0.96666300 |
| H | 5.49826100  | 0.82847600  | 0.61874500  |
| H | 6.01451300  | -1.40387100 | -0.34017700 |
| C | 0.89179200  | 0.11718800  | 0.33638200  |
| H | 0.72372900  | 0.64286200  | 1.28446000  |
| H | 0.22775900  | -0.75673700 | 0.32843200  |
| O | 0.85268500  | 3.60569900  | 0.49383200  |
| H | 1.28994200  | 3.76254900  | 1.33781900  |
| H | -0.04331200 | 3.28094800  | 0.70597600  |
| C | -1.52195200 | 1.91014300  | -2.13305900 |
| H | -0.96381600 | 2.85193900  | -2.13576400 |
| H | -1.14167800 | 1.27523400  | -2.93599000 |
| H | -2.57688300 | 2.12533800  | -2.34346600 |
| N | -1.91916900 | -0.01652000 | -0.65220600 |
| C | -2.29971900 | -2.28339800 | -1.09763300 |
| C | -3.38179200 | -1.77767800 | -0.15055300 |
| C | -2.79112400 | -0.50650900 | 0.44779000  |
| C | -1.79108400 | -1.00013100 | -1.73165100 |
| H | -1.49783900 | -2.76454900 | -0.52359800 |
| H | -2.66824300 | -2.99488500 | -1.84240200 |
| H | -3.64097400 | -2.49833400 | 0.62890100  |
| H | -4.28977500 | -1.53060200 | -0.71687900 |
| H | -3.56692900 | 0.24838300  | 0.63803500  |
| H | -2.40833200 | -0.71221500 | -2.59709500 |
| H | -0.74884000 | -1.07712100 | -2.07377400 |
| C | -2.00308500 | -0.71391500 | 1.77079400  |
| O | -1.64521100 | -1.87041600 | 2.07507700  |
| O | -1.77690900 | 0.34540800  | 2.42386600  |
| H | -1.87860900 | 1.67595900  | 1.17667100  |

#### EtOH-TS11-12

|   |             |             |             |
|---|-------------|-------------|-------------|
| C | -0.93052900 | 0.98987500  | -0.90931000 |
| N | -1.19221300 | 2.04331600  | 0.06112500  |
| H | -1.96804800 | 2.61463400  | -0.27030300 |
| N | 0.58524400  | 0.70078800  | -0.76345500 |
| H | 0.92646000  | 0.22378200  | -1.60154500 |
| H | 1.03913000  | 1.69151500  | -0.68466800 |
| C | 2.44880800  | -0.41335700 | 0.36885800  |
| C | 2.85056700  | -1.59951800 | -0.25132100 |



|   |             |             |             |
|---|-------------|-------------|-------------|
| C | 3.41815100  | 0.45743700  | 0.87183200  |
| C | 4.20279300  | -1.90898200 | -0.37108900 |
| H | 2.09752000  | -2.28771500 | -0.63603300 |
| C | 4.77042200  | 0.14891700  | 0.75430800  |
| H | 3.10844700  | 1.37922800  | 1.36257700  |
| C | 5.16382300  | -1.03397400 | 0.13118900  |
| H | 4.50604000  | -2.83595200 | -0.85145800 |
| H | 5.51747500  | 0.83131200  | 1.15209200  |
| H | 6.21994200  | -1.27644600 | 0.04188600  |
| C | 0.99292800  | -0.06605900 | 0.45476300  |
| H | 0.77532600  | 0.57444800  | 1.31595000  |
| H | 0.35173000  | -0.95091300 | 0.52316900  |
| O | 1.01461800  | 3.17535700  | -0.23054200 |
| H | 1.53090900  | 3.40724800  | 0.54759500  |
| H | -0.22629600 | 2.72283900  | 0.06513300  |
| C | -1.12402500 | 1.48474900  | -2.33574100 |
| H | -0.57842500 | 2.42116600  | -2.49284200 |
| H | -0.78753300 | 0.75730900  | -3.08155000 |
| H | -2.19226500 | 1.66869900  | -2.50213900 |
| N | -1.64553000 | -0.20583400 | -0.57631400 |
| C | -2.59605300 | -2.30844500 | -0.83909700 |
| C | -3.69283500 | -1.37107600 | -0.34712500 |
| C | -2.93128700 | -0.14695100 | 0.15286800  |
| C | -1.64212200 | -1.33481800 | -1.50505000 |
| H | -2.09917000 | -2.80098400 | 0.00845300  |
| H | -2.95794400 | -3.08147400 | -1.52312100 |
| H | -4.32175700 | -1.79726700 | 0.43763100  |
| H | -4.33523700 | -1.08235100 | -1.18879700 |
| H | -3.49144600 | 0.77281200  | -0.08669600 |
| H | -2.02127000 | -1.05996200 | -2.50546200 |
| H | -0.62864200 | -1.74441400 | -1.63131300 |
| C | -2.67935300 | -0.14113700 | 1.67453100  |
| O | -3.19587900 | -0.97556400 | 2.41353700  |
| O | -1.90198700 | 0.80944600  | 2.09955600  |
| H | -1.53918900 | 1.47073100  | 1.19384100  |

#### **EtOH-TS6b-18**

|   |            |             |             |
|---|------------|-------------|-------------|
| N | 0.43077900 | -0.77152500 | -0.74913100 |
| H | 0.94672500 | -1.10946200 | -1.56254100 |
| H | 0.19013400 | 0.23000500  | -0.86358800 |
| C | 2.59102200 | -0.27546300 | 0.33884500  |
| C | 3.75352000 | -1.04608600 | 0.31670900  |
| C | 2.68884100 | 1.11516200  | 0.21207000  |
| C | 5.00077300 | -0.43955600 | 0.17141300  |
| H | 3.68191200 | -2.12854100 | 0.41566100  |
| C | 3.93226800 | 1.72060700  | 0.06445700  |
| H | 1.77894600 | 1.71720100  | 0.22427200  |
| C | 5.09127600 | 0.94405700  | 0.04414700  |
| H | 5.90087700 | -1.04974300 | 0.15711600  |
| H | 4.00007900 | 2.80169900  | -0.03206800 |
| H | 6.06323400 | 1.41826700  | -0.07045200 |
| C | 1.23637400 | -0.91622900 | 0.47190400  |
| H | 0.66953800 | -0.43351700 | 1.27889800  |

|   |             |             |             |
|---|-------------|-------------|-------------|
| H | 1.33573300  | -1.98254900 | 0.71233400  |
| C | -2.77347800 | 0.38453100  | 2.10945400  |
| C | -3.64865600 | 0.80362200  | 0.93531900  |
| C | -2.75514600 | 0.51852200  | -0.27687800 |
| C | -2.14966600 | -0.90687500 | 1.60777600  |
| H | -1.98978100 | 1.13442100  | 2.28201700  |
| H | -3.32605300 | 0.24444600  | 3.04270400  |
| H | -3.96523800 | 1.84925200  | 0.96398400  |
| H | -4.54649300 | 0.17305800  | 0.89375100  |
| H | -3.36906400 | 0.27806000  | -1.15468700 |
| H | -2.81392600 | -1.76635100 | 1.79190800  |
| H | -1.18347300 | -1.11588000 | 2.08447100  |
| N | -2.01207200 | -0.67268200 | 0.16445900  |
| C | -1.91510700 | 1.76789400  | -0.64625800 |
| O | -2.58802400 | 2.72060200  | -1.09603500 |
| O | -0.66530500 | 1.74329600  | -0.46928000 |
| C | -1.32223600 | -1.50738800 | -0.65996000 |
| C | -1.63662300 | -1.43293000 | -2.12991000 |
| H | -1.51689000 | -0.42201700 | -2.52748100 |
| H | -0.98325300 | -2.10627000 | -2.69196400 |
| H | -2.67256500 | -1.75257600 | -2.28613200 |
| N | -1.16164700 | -2.80573100 | -0.20022900 |
| H | -0.57249700 | -3.39076500 | -0.78002800 |
| H | -0.95970500 | -2.92955600 | 0.78411700  |

#### EtOH-TS7-19

|   |             |             |             |
|---|-------------|-------------|-------------|
| N | -0.43140700 | -0.64684200 | 0.11691600  |
| H | 0.65805900  | 1.16890000  | -0.37801400 |
| H | -0.43496400 | -1.01171500 | -0.83564600 |
| C | -2.85361400 | -0.36861000 | 0.23355100  |
| C | -2.91528400 | 1.02883700  | 0.26063700  |
| C | -3.92140700 | -1.07897400 | -0.31456100 |
| C | -4.02194300 | 1.69986900  | -0.24761500 |
| H | -2.08011900 | 1.58720600  | 0.68401900  |
| C | -5.03399900 | -0.40998200 | -0.82625300 |
| H | -3.88088300 | -2.16742600 | -0.34153500 |
| C | -5.08621200 | 0.98040100  | -0.79432600 |
| H | -4.05834100 | 2.78652500  | -0.21750200 |
| H | -5.85777000 | -0.97773800 | -1.25302600 |
| H | -5.95147900 | 1.50428000  | -1.19386100 |
| C | -1.65295300 | -1.07926900 | 0.79633600  |
| H | -1.81184600 | -2.16973800 | 0.74233100  |
| H | -1.54757800 | -0.82764300 | 1.86179900  |
| C | 3.68507400  | -1.02906000 | -1.61604600 |
| C | 3.78146800  | 0.41222900  | -1.13852800 |
| C | 2.87648800  | 0.41899600  | 0.10527900  |
| C | 2.21187100  | -1.34559700 | -1.40033600 |
| H | 4.00726300  | -1.16406600 | -2.65310000 |
| H | 4.30033300  | -1.67713000 | -0.97728200 |
| H | 3.36802900  | 1.08691400  | -1.90277700 |
| H | 4.79549900  | 0.74803900  | -0.90406400 |
| H | 3.45815900  | 0.18249500  | 1.01032300  |
| H | 2.04073400  | -2.41807000 | -1.25290400 |

|   |            |             |             |
|---|------------|-------------|-------------|
| H | 1.61397900 | -1.03560900 | -2.27598300 |
| N | 1.86915800 | -0.56872400 | -0.20924800 |
| C | 2.32222300 | 1.81732000  | 0.29910100  |
| O | 2.98427000 | 2.72587600  | 0.76046600  |
| O | 1.07397400 | 2.02861000  | -0.12555900 |
| C | 0.85842800 | -1.00275000 | 0.75622000  |
| C | 0.98458300 | -2.48737100 | 1.09461500  |
| H | 1.99391400 | -2.70155600 | 1.46563100  |
| H | 0.26241900 | -2.76583200 | 1.87031600  |
| H | 0.78806500 | -3.12128100 | 0.22489600  |
| N | 1.02121900 | -0.23959200 | 1.97811900  |
| H | 0.42076300 | 0.58037900  | 1.99365900  |
| H | 0.82868400 | -0.79295200 | 2.80451500  |

#### EtOH-TS19-20

|   |             |             |             |
|---|-------------|-------------|-------------|
| N | -0.66623600 | -0.17043800 | 0.23536000  |
| H | 1.72036200  | 1.49700800  | -0.99438700 |
| H | -0.69782300 | -0.63109700 | -0.67038200 |
| C | -3.09674900 | -0.15589800 | 0.35320700  |
| C | -3.39972300 | 1.20426900  | 0.23220200  |
| C | -3.98987000 | -1.09359100 | -0.16474300 |
| C | -4.57302100 | 1.61645300  | -0.38974500 |
| H | -2.70264100 | 1.94059700  | 0.63217300  |
| C | -5.16790200 | -0.68512800 | -0.79113800 |
| H | -3.76127300 | -2.15518200 | -0.07487200 |
| C | -5.46149900 | 0.67057200  | -0.90431700 |
| H | -4.79927300 | 2.67717700  | -0.47239500 |
| H | -5.85498400 | -1.42792100 | -1.19016100 |
| H | -6.37943600 | 0.99238300  | -1.39073300 |
| C | -1.82381400 | -0.59204000 | 1.02536300  |
| H | -1.85944500 | -1.68167500 | 1.19701900  |
| H | -1.75577700 | -0.12114700 | 2.01732200  |
| C | 2.96073500  | -2.06724400 | -1.04429900 |
| C | 3.89087200  | -0.89770400 | -0.77055400 |
| C | 3.02849000  | 0.03524100  | 0.10413900  |
| C | 1.62531700  | -1.36470000 | -1.22680200 |
| H | 3.25527400  | -2.65281200 | -1.92064600 |
| H | 2.92473900  | -2.74250900 | -0.17936800 |
| H | 4.14817500  | -0.39518500 | -1.71368500 |
| H | 4.82557900  | -1.16308600 | -0.26994100 |
| H | 3.23649100  | -0.14576700 | 1.16870800  |
| H | 0.76833500  | -2.02642600 | -1.06923100 |
| H | 1.54077600  | -0.95814200 | -2.24469300 |
| N | 1.62818600  | -0.24191500 | -0.25398700 |
| C | 3.39760300  | 1.47617400  | -0.21166600 |
| O | 4.45618800  | 1.97593100  | 0.10670300  |
| O | 2.48024900  | 2.13259000  | -0.91699000 |
| C | 0.65415000  | -0.34026000 | 0.85595900  |
| C | 0.80377600  | -1.65374000 | 1.63012400  |
| H | 1.82157000  | -1.74033300 | 2.02711900  |
| H | 0.12577900  | -1.66515200 | 2.48912200  |
| H | 0.58761500  | -2.53254200 | 1.01130600  |
| N | 0.85415100  | 0.75888000  | 1.81676800  |

|   |             |            |            |
|---|-------------|------------|------------|
| H | 1.56402400  | 1.41608200 | 1.51137900 |
| H | -0.00245100 | 1.30743300 | 1.84528300 |

#### EtOH-TS20-21

|   |             |             |             |
|---|-------------|-------------|-------------|
| N | 0.66737600  | -0.40994400 | 0.07288600  |
| H | -2.84673100 | -0.67076700 | -1.51603800 |
| H | 0.74589000  | 0.41202000  | 0.67020700  |
| C | 3.08871800  | -0.51345500 | 0.08854600  |
| C | 3.46357200  | -0.15998200 | -1.21195900 |
| C | 3.90334300  | -0.12485100 | 1.15239300  |
| C | 4.62857700  | 0.56363900  | -1.44342000 |
| H | 2.82910100  | -0.45937600 | -2.04570300 |
| C | 5.07258700  | 0.60201700  | 0.92593400  |
| H | 3.61944400  | -0.39653700 | 2.16883600  |
| C | 5.43716400  | 0.94736300  | -0.37230800 |
| H | 4.91033700  | 0.82718200  | -2.46050400 |
| H | 5.69780700  | 0.89689400  | 1.76572300  |
| H | 6.34904800  | 1.51205500  | -0.55233300 |
| C | 1.81691700  | -1.27917200 | 0.32900400  |
| H | 1.83230700  | -1.68778800 | 1.35519100  |
| H | 1.75241600  | -2.13339200 | -0.35341200 |
| C | -1.53552900 | 2.32765900  | 0.33556600  |
| C | -2.88699400 | 1.82982700  | 0.84643800  |
| C | -2.88521600 | 0.31621400  | 0.49814300  |
| C | -1.23386500 | 1.34475300  | -0.78633100 |
| H | -1.56673500 | 3.36989500  | 0.00102000  |
| H | -0.77003600 | 2.25110600  | 1.12074600  |
| H | -3.71040700 | 2.33710600  | 0.32924500  |
| H | -3.02982600 | 1.99237300  | 1.91854500  |
| H | -2.95581000 | -0.28473800 | 1.40900900  |
| H | -0.19775200 | 1.31477400  | -1.12287500 |
| H | -1.85785500 | 1.58668800  | -1.66291300 |
| N | -1.65876500 | 0.03659200  | -0.25393000 |
| C | -4.11290300 | -0.06505500 | -0.32199600 |
| O | -5.25157100 | 0.13695900  | 0.04732100  |
| O | -3.83880000 | -0.65398600 | -1.48250800 |
| C | -0.66335800 | -0.98769600 | 0.23384500  |
| C | -0.93637100 | -1.40657600 | 1.67738900  |
| H | -1.87788100 | -1.95604500 | 1.78915200  |
| H | -0.13980200 | -2.08054400 | 2.00480700  |
| H | -0.95050400 | -0.53564800 | 2.34424100  |
| N | -0.70219400 | -2.18885400 | -0.58298100 |
| H | -1.59807400 | -2.65785500 | -0.47771000 |
| H | -0.59674300 | -1.93385400 | -1.56302000 |

#### EtOH-TS22-23

|   |             |             |             |
|---|-------------|-------------|-------------|
| N | -0.63463800 | -0.30723600 | -0.00208100 |
| H | 3.02600900  | -0.65419600 | 1.32804700  |
| H | -0.58831200 | 0.14990000  | -0.91269700 |
| C | -3.06760900 | -0.50761300 | -0.05695500 |
| C | -3.34614000 | 0.55410600  | 0.81013600  |
| C | -4.03680500 | -0.89084000 | -0.98446700 |
| C | -4.56919000 | 1.21437600  | 0.75230000  |

|   |             |             |             |
|---|-------------|-------------|-------------|
| H | -2.58693600 | 0.85932600  | 1.52934000  |
| C | -5.26491900 | -0.23200000 | -1.04554800 |
| H | -3.82685700 | -1.71359400 | -1.66729000 |
| C | -5.53357800 | 0.82242900  | -0.17774500 |
| H | -4.77365400 | 2.03707900  | 1.43404900  |
| H | -6.00926100 | -0.54187500 | -1.77567900 |
| H | -6.48902600 | 1.33992900  | -0.22508400 |
| C | -1.75315900 | -1.23822500 | 0.02993100  |
| H | -1.71629500 | -2.00397200 | -0.76576900 |
| H | -1.71190800 | -1.77962900 | 0.98670800  |
| C | 1.78745600  | 2.57108100  | -0.27216300 |
| C | 3.06493600  | 1.89981600  | -0.75789900 |
| C | 2.71713200  | 0.39268200  | -0.72896500 |
| C | 1.30826100  | 1.60319700  | 0.79749200  |
| H | 1.95705900  | 3.58585900  | 0.10158700  |
| H | 1.04687800  | 2.61865000  | -1.08271300 |
| H | 3.88069500  | 2.10664100  | -0.05060500 |
| H | 3.39912600  | 2.21641700  | -1.74952400 |
| H | 2.45592100  | 0.04297600  | -1.73930600 |
| H | 0.23649400  | 1.67298100  | 1.00667300  |
| H | 1.85463100  | 1.76883000  | 1.74350600  |
| N | 1.62938700  | 0.29516000  | 0.22014100  |
| C | 3.95375300  | -0.37777300 | -0.28879800 |
| O | 4.92420500  | -0.53764000 | -1.00089800 |
| O | 3.92825100  | -0.82802900 | 0.96607300  |
| C | 0.70506000  | -0.82286200 | 0.32687300  |
| C | 1.11358600  | -1.97513500 | -0.58547800 |
| H | 2.12627200  | -2.33734400 | -0.38036500 |
| H | 0.43482800  | -2.81935000 | -0.42514000 |
| H | 1.03843200  | -1.68721900 | -1.63930100 |
| N | 0.76948300  | -1.30280200 | 1.70949100  |
| H | 0.32493500  | -0.62571800 | 2.32806500  |
| H | 0.27899300  | -2.18561300 | 1.82895100  |

#### **EtOH-TS23-24**

|   |             |             |             |
|---|-------------|-------------|-------------|
| N | -0.67330400 | -0.17201500 | -0.36969400 |
| H | 1.68522300  | -1.01496500 | 1.82467200  |
| H | -0.81877500 | 0.68055500  | -0.89500100 |
| C | -3.08638400 | -0.45252600 | -0.18587300 |
| C | -3.24229800 | 0.44587100  | 0.87407700  |
| C | -4.18636600 | -0.74236700 | -0.99361900 |
| C | -4.47564400 | 1.04070500  | 1.12096000  |
| H | -2.38562400 | 0.68165800  | 1.50449100  |
| C | -5.42456300 | -0.15218800 | -0.74541600 |
| H | -4.07162400 | -1.43531100 | -1.82620100 |
| C | -5.57169000 | 0.74165800  | 0.31190600  |
| H | -4.58322000 | 1.73892900  | 1.94783700  |
| H | -6.27286500 | -0.38728400 | -1.38397900 |
| H | -6.53565600 | 1.20696200  | 0.50379400  |
| C | -1.76296400 | -1.12741500 | -0.43368000 |
| H | -1.79919900 | -1.66669500 | -1.39427000 |
| H | -1.59566100 | -1.88599300 | 0.34522700  |
| C | 2.33512900  | 2.61872100  | -0.56790600 |

|   |            |             |             |
|---|------------|-------------|-------------|
| C | 3.54948200 | 1.69995400  | -0.53161400 |
| C | 2.97756400 | 0.27236100  | -0.64132900 |
| C | 1.29177200 | 1.80889100  | 0.17857100  |
| H | 2.52104500 | 3.59326700  | -0.10705600 |
| H | 2.00010300 | 2.78406900  | -1.59986700 |
| H | 4.06071000 | 1.81188300  | 0.43446100  |
| H | 4.28072300 | 1.90066300  | -1.31928000 |
| H | 3.05942400 | -0.10171500 | -1.67093900 |
| H | 0.26867100 | 2.13566800  | -0.02257100 |
| H | 1.45312800 | 1.85910500  | 1.26895800  |
| N | 1.55155100 | 0.44905600  | -0.30576300 |
| C | 3.80958300 | -0.64610100 | 0.27779200  |
| O | 4.83415100 | -1.12837400 | -0.25336200 |
| O | 3.44152200 | -0.77769200 | 1.47754500  |
| C | 0.65217600 | -0.56498700 | -0.24204900 |
| C | 1.06938000 | -1.86402600 | -0.87604800 |
| H | 2.02964500 | -2.22507600 | -0.50001300 |
| H | 0.32423900 | -2.64236100 | -0.70207300 |
| H | 1.14982600 | -1.70658900 | -1.95875000 |
| N | 0.68068900 | -1.13224400 | 1.60509600  |
| H | 0.11713800 | -0.48247900 | 2.14938800  |
| H | 0.38374500 | -2.08065800 | 1.82559900  |

#### EtOH-TS8-25

|   |             |             |             |
|---|-------------|-------------|-------------|
| C | 3.92900200  | -0.30986200 | -0.99077600 |
| C | 2.81952700  | -1.23278400 | -1.47803700 |
| C | 1.64640700  | -0.87144400 | -0.57704300 |
| C | 3.19387100  | 0.99104000  | -0.69186000 |
| H | 4.36704000  | -0.71578900 | -0.07034300 |
| H | 4.73454700  | -0.17912000 | -1.71958200 |
| H | 3.07480400  | -2.29406600 | -1.42334100 |
| H | 2.54874000  | -0.99371300 | -2.51415400 |
| H | 0.69048500  | -1.08903500 | -1.08024500 |
| H | 3.22428200  | 1.67937900  | -1.55106400 |
| H | 3.63961300  | 1.52029400  | 0.16297800  |
| N | 1.80833200  | 0.57786000  | -0.42018800 |
| C | 1.62982500  | -1.69342500 | 0.72284100  |
| O | 2.52771700  | -2.43191200 | 1.07757200  |
| O | 0.51792900  | -1.58377300 | 1.44600500  |
| C | 1.01917000  | 1.38650900  | 0.48185300  |
| C | 1.03278800  | 2.83710900  | 0.00177800  |
| H | 0.34754900  | 3.42810400  | 0.62119200  |
| H | 2.03256100  | 3.26448600  | 0.12183000  |
| H | 0.74054300  | 2.92612300  | -1.05029600 |
| N | 1.53404700  | 1.37347400  | 1.87031500  |
| H | 2.31762000  | 0.73251900  | 1.95653700  |
| H | 0.83445600  | 1.07101400  | 2.54183500  |
| N | -0.35015800 | 0.82337000  | 0.51619000  |
| H | -0.02230200 | -0.80875500 | 1.10316200  |
| H | -0.85170200 | 1.28507200  | 1.27642800  |
| C | -2.50049700 | 0.33471200  | -0.50284400 |
| C | -2.65156100 | -1.04961700 | -0.62783100 |
| C | -3.60739400 | 1.10392700  | -0.13921300 |

|   |             |             |             |
|---|-------------|-------------|-------------|
| C | -3.88262500 | -1.65266800 | -0.38923600 |
| H | -1.79835000 | -1.66045800 | -0.92279900 |
| C | -4.84257200 | 0.50432800  | 0.10022700  |
| H | -3.49904700 | 2.18428100  | -0.04621400 |
| C | -4.98138700 | -0.87593600 | -0.02294200 |
| H | -3.98701600 | -2.73009500 | -0.49311400 |
| H | -5.69696500 | 1.11608400  | 0.38024000  |
| H | -5.94455100 | -1.34631500 | 0.16046700  |
| C | -1.16140700 | 0.98534000  | -0.70499300 |
| H | -1.30251700 | 2.04657800  | -0.95851900 |
| H | -0.61939500 | 0.52258900  | -1.53938100 |

**EtOH-TS25-26**

|   |             |             |             |
|---|-------------|-------------|-------------|
| C | 3.50973800  | -0.39199000 | -1.56734200 |
| C | 2.20343600  | -1.13278700 | -1.82627700 |
| C | 1.39420700  | -0.84020700 | -0.56957000 |
| C | 3.04082100  | 0.90312800  | -0.91627800 |
| H | 4.12993900  | -0.96622700 | -0.86617300 |
| H | 4.09919900  | -0.21656700 | -2.47214900 |
| H | 2.32887300  | -2.20328200 | -2.00354700 |
| H | 1.68159600  | -0.69220000 | -2.68588400 |
| H | 0.31356000  | -0.89275000 | -0.77543700 |
| H | 2.85559800  | 1.68148400  | -1.67621500 |
| H | 3.79047600  | 1.30328900  | -0.21599200 |
| N | 1.80376500  | 0.52101700  | -0.24145300 |
| C | 1.63470200  | -1.87658300 | 0.53500600  |
| O | 2.23756300  | -2.91906500 | 0.37382500  |
| O | 1.08059200  | -1.60994000 | 1.71813400  |
| C | 1.12857500  | 1.41029400  | 0.67218300  |
| C | 1.23484200  | 2.85873100  | 0.19047400  |
| H | 0.64527500  | 3.50316700  | 0.85416000  |
| H | 2.27283500  | 3.20670600  | 0.21994700  |
| H | 0.86144100  | 2.98000300  | -0.83296200 |
| N | 1.68890600  | 1.26578100  | 2.03144800  |
| H | 1.49605100  | 2.09287200  | 2.59435100  |
| H | 2.70020800  | 1.18138500  | 1.96971700  |
| N | -0.25709000 | 0.95004800  | 0.81027800  |
| H | 0.69554300  | -0.70346800 | 1.72994600  |
| H | -0.64116800 | 1.33747700  | 1.67037800  |
| C | -2.44611400 | 0.47074600  | -0.22361400 |
| C | -2.55245500 | -0.74123500 | 0.46243500  |
| C | -3.57504800 | 0.97081700  | -0.88012000 |
| C | -3.75870100 | -1.43953300 | 0.48707800  |
| H | -1.68348800 | -1.13421000 | 0.98633300  |
| C | -4.77902400 | 0.27286100  | -0.86218000 |
| H | -3.50687000 | 1.92127100  | -1.40919400 |
| C | -4.87547500 | -0.93719400 | -0.17632100 |
| H | -3.82427100 | -2.38052700 | 1.02896100  |
| H | -5.64648500 | 0.67843000  | -1.37821900 |

**EtOH-TS26-27**

|   |            |             |             |
|---|------------|-------------|-------------|
| C | 3.61843800 | -0.66947300 | -1.32557400 |
| C | 2.32712100 | -1.40003300 | -1.67350200 |

|   |             |             |             |
|---|-------------|-------------|-------------|
| C | 1.34162900  | -0.90669900 | -0.61119900 |
| C | 3.14034900  | 0.71959700  | -0.92248900 |
| H | 4.10702600  | -1.15695200 | -0.47416100 |
| H | 4.33064700  | -0.63246300 | -2.15451600 |
| H | 2.42245500  | -2.48994700 | -1.66278600 |
| H | 1.97459800  | -1.09996200 | -2.66902500 |
| H | 0.31494800  | -0.94301500 | -0.98600200 |
| H | 3.12161900  | 1.41340700  | -1.77403800 |
| H | 3.75994300  | 1.16166100  | -0.13215800 |
| N | 1.76919100  | 0.49522400  | -0.43181900 |
| C | 1.40128300  | -1.79075700 | 0.65477500  |
| O | 0.66514300  | -2.80161200 | 0.61086300  |
| O | 2.19688000  | -1.46567300 | 1.57645800  |
| C | 1.09855200  | 1.40882300  | 0.27079100  |
| C | 1.46597000  | 2.85226700  | 0.08697100  |
| H | 0.92649600  | 3.46953200  | 0.80997600  |
| H | 2.53650400  | 3.04382200  | 0.19036900  |
| H | 1.16203700  | 3.15501300  | -0.92475000 |
| N | 1.75362400  | 1.24105900  | 2.18749000  |
| H | 2.00276900  | 0.23898900  | 2.18521500  |
| H | 2.58215200  | 1.79941700  | 2.37770800  |
| N | -0.25025800 | 1.08115100  | 0.53530500  |
| H | 1.07625100  | 1.42775600  | 2.92302900  |
| H | -0.60005100 | 1.65907800  | 1.29486900  |
| C | -2.46029500 | 0.49527500  | -0.35491300 |
| C | -2.47325600 | -0.81237800 | 0.14296300  |
| C | -3.67307200 | 1.12773600  | -0.63089100 |
| C | -3.68099400 | -1.47141600 | 0.35238100  |
| H | -1.53234400 | -1.31472200 | 0.37151900  |
| C | -4.88338300 | 0.46773700  | -0.42232700 |
| H | -3.66997200 | 2.14952600  | -1.00894400 |
| C | -4.88957800 | -0.83396900 | 0.07081000  |
| H | -3.67953400 | -2.48856900 | 0.73777900  |
| H | -5.82076700 | 0.97509900  | -0.63879000 |
| H | -5.83194200 | -1.35025700 | 0.23888300  |
| C | -1.16032300 | 1.20685400  | -0.61734900 |
| H | -1.35825400 | 2.26215800  | -0.86626600 |
| H | -0.66331900 | 0.77530600  | -1.49600000 |

#### EtOH-TS12-28

|   |             |             |             |
|---|-------------|-------------|-------------|
| C | -0.67152900 | -1.05353800 | 0.81070500  |
| N | -0.93904700 | -2.14571900 | -0.12878400 |
| H | -1.81115000 | -2.61794700 | 0.09984600  |
| N | 0.74936000  | -0.77519400 | 0.72832100  |
| H | 1.03288200  | -0.14542200 | 1.47538400  |
| C | 2.72564700  | 0.01131200  | -0.43586700 |
| C | 3.17156900  | 1.33315900  | -0.39819100 |
| C | 3.66264500  | -1.02101600 | -0.32660700 |
| C | 4.52945000  | 1.62217000  | -0.26187400 |
| H | 2.44633300  | 2.14277900  | -0.48252900 |
| C | 5.01776000  | -0.73813400 | -0.19079900 |
| H | 3.31774300  | -2.05445500 | -0.35044400 |
| C | 5.45465600  | 0.58689200  | -0.15882500 |



|   |             |             |             |
|---|-------------|-------------|-------------|
| H | 4.86301000  | 2.65713800  | -0.23845300 |
| H | 5.73703600  | -1.55027200 | -0.11208000 |
| H | 6.51414300  | 0.80959500  | -0.05554700 |
| C | 1.26248700  | -0.30485800 | -0.55974000 |
| H | 1.11231700  | -1.10327700 | -1.29832400 |
| H | 0.72208300  | 0.58146500  | -0.93514400 |
| H | -0.20424600 | -2.84103800 | -0.01625300 |
| C | -0.99452500 | -1.43038200 | 2.25528500  |
| H | -0.42458900 | -2.32037000 | 2.54182900  |
| H | -0.74306100 | -0.62428600 | 2.95482900  |
| H | -2.06185200 | -1.65428500 | 2.37053100  |
| N | -1.46145100 | 0.10282400  | 0.33693000  |
| C | -2.44508100 | 2.20718400  | 0.71765900  |
| C | -3.53164800 | 1.15308100  | 0.88073700  |
| C | -2.91231500 | -0.05327400 | 0.17598800  |
| C | -1.18765700 | 1.39591500  | 0.97824400  |
| H | -2.44150200 | 2.59642900  | -0.31058300 |
| H | -2.54951700 | 3.05493200  | 1.40063600  |
| H | -4.50335800 | 1.42673900  | 0.46157800  |
| H | -3.66733900 | 0.91688900  | 1.94443900  |
| H | -3.28942600 | -0.99095900 | 0.61512800  |
| H | -1.03512500 | 1.28847600  | 2.06695900  |
| H | -0.28324400 | 1.85894500  | 0.56108600  |
| C | -3.31043700 | -0.11094200 | -1.30185300 |
| O | -4.44215600 | 0.09884600  | -1.69014600 |
| O | -2.34161700 | -0.43387600 | -2.15176400 |
| H | -1.52911400 | -0.60964000 | -1.62205000 |

#### EtOH-TS28-29

|   |             |             |             |
|---|-------------|-------------|-------------|
| C | 0.63729800  | 1.14483100  | 0.60425100  |
| N | 0.82983600  | 2.14802900  | -0.43252500 |
| H | 1.60679700  | 1.96427300  | -1.05346300 |
| N | -0.76949600 | 0.77632700  | 0.62247300  |
| H | -0.98544200 | 0.18712000  | 1.42363000  |
| C | -2.78293400 | -0.06429700 | -0.43366000 |
| C | -3.25703100 | -1.36352900 | -0.24649800 |
| C | -3.69613600 | 0.99489200  | -0.42743200 |
| C | -4.61823500 | -1.60501300 | -0.06064300 |
| H | -2.55040300 | -2.19402300 | -0.24925000 |
| C | -5.05462100 | 0.75957700  | -0.24443800 |
| H | -3.32779100 | 2.01075900  | -0.56799700 |
| C | -5.51935600 | -0.54359700 | -0.06027800 |
| H | -4.97407900 | -2.62285500 | 0.08259000  |
| H | -5.75496000 | 1.59186400  | -0.24766400 |
| H | -6.58160000 | -0.72909700 | 0.08158900  |
| C | -1.31437500 | 0.20306200  | -0.60350800 |
| H | -1.14466900 | 0.93374200  | -1.40468000 |
| H | -0.81000000 | -0.73236700 | -0.90780400 |
| H | 0.94673500  | 3.07617100  | -0.04139800 |
| C | 0.97481400  | 1.71031100  | 1.98293300  |
| H | 0.37910700  | 2.61171100  | 2.16232800  |
| H | 0.74915800  | 1.00018200  | 2.78624000  |
| H | 2.03489300  | 1.97869900  | 2.04863100  |

|   |            |             |             |
|---|------------|-------------|-------------|
| N | 1.47434000 | -0.04065600 | 0.26032400  |
| C | 2.52917600 | -2.01443500 | 1.04399600  |
| C | 3.54658200 | -0.88415200 | 1.11988000  |
| C | 2.93381000 | 0.15161500  | 0.17423800  |
| C | 1.21225600 | -1.25649100 | 1.06180000  |
| H | 2.64244500 | -2.56925500 | 0.10211900  |
| H | 2.60800900 | -2.73168500 | 1.86567000  |
| H | 4.56369600 | -1.16370600 | 0.83071300  |
| H | 3.58079900 | -0.46885700 | 2.13546200  |
| H | 3.23869900 | 1.17341100  | 0.43822100  |
| H | 0.94999400 | -1.00050000 | 2.10131900  |
| H | 0.37899300 | -1.83221900 | 0.63932300  |
| C | 3.40914300 | -0.08353700 | -1.26050200 |
| O | 4.57002700 | 0.00914900  | -1.59989300 |
| O | 2.44104600 | -0.40299000 | -2.11505800 |
| H | 1.61592700 | -0.41396300 | -1.55871300 |

#### **EtOH-TS29-30**

|   |             |             |             |
|---|-------------|-------------|-------------|
| C | 0.69660800  | -1.18909700 | -0.12279400 |
| N | 0.86918800  | -2.04220200 | 1.04275000  |
| H | 0.72763600  | -1.52085500 | 1.90520400  |
| N | -0.72414900 | -0.95119400 | -0.28883000 |
| H | -0.89891300 | -0.26781800 | -1.01901300 |
| C | -2.91780800 | -0.22435900 | 0.44011100  |
| C | -3.32786200 | 1.07921300  | 0.72418600  |
| C | -3.77617800 | -1.06147200 | -0.28042400 |
| C | -4.57554000 | 1.53936300  | 0.30417000  |
| H | -2.66512800 | 1.73799600  | 1.28523300  |
| C | -5.02062700 | -0.60554800 | -0.70347400 |
| H | -3.45951200 | -2.07943100 | -0.50448100 |
| C | -5.42343600 | 0.69803200  | -0.41097500 |
| H | -4.88343300 | 2.55636600  | 0.53622200  |
| H | -5.68053900 | -1.26788600 | -1.25920500 |
| H | -6.39687800 | 1.05479700  | -0.73946500 |
| C | -1.56858500 | -0.71943400 | 0.87965400  |
| H | -1.67677600 | -1.67064300 | 1.41900800  |
| H | -1.14720900 | 0.00552200  | 1.59842000  |
| H | 1.81440600  | -2.41479600 | 1.06783900  |
| C | 1.16348800  | -1.97882500 | -1.33956700 |
| H | 0.56930900  | -2.89429000 | -1.38964000 |
| H | 1.00104200  | -1.40799700 | -2.26126200 |
| H | 2.22128100  | -2.26089400 | -1.28211500 |
| N | 1.47193700  | 0.11123800  | 0.02212600  |
| C | 1.85680700  | 2.42920000  | 0.03635500  |
| C | 2.75597100  | 1.83173200  | -1.03556600 |
| C | 2.72686300  | 0.32788800  | -0.71282500 |
| C | 0.75377500  | 1.39245000  | 0.13156300  |
| H | 2.39053900  | 2.51052000  | 0.99314400  |
| H | 1.47687000  | 3.42163900  | -0.22334300 |
| H | 3.77343300  | 2.23433100  | -1.05388200 |
| H | 2.31458400  | 1.98880800  | -2.02724000 |
| H | 2.80913700  | -0.25162600 | -1.63839500 |
| H | 0.03371500  | 1.54510700  | -0.69168900 |

|   |            |             |             |
|---|------------|-------------|-------------|
| H | 0.19950700 | 1.45670900  | 1.07544200  |
| C | 3.93542400 | -0.04775300 | 0.13849300  |
| O | 5.06255800 | -0.13449100 | -0.30293900 |
| O | 3.66305900 | -0.24024300 | 1.42752600  |
| H | 2.67976800 | -0.13093400 | 1.48675300  |

**EtOH-TS30-31**

|   |             |             |             |
|---|-------------|-------------|-------------|
| C | -0.83841300 | 1.40056600  | 0.23037800  |
| N | -0.94283300 | 2.26790700  | 1.39672400  |
| H | -0.04559700 | 2.54371700  | 1.77677700  |
| N | 0.56479200  | 1.18495800  | -0.11918500 |
| H | 0.65724500  | 0.47251200  | -0.83745300 |
| C | 2.80232200  | 0.35368900  | 0.30295200  |
| C | 3.12558700  | -0.93562900 | 0.73007300  |
| C | 3.57168700  | 0.94571300  | -0.70368100 |
| C | 4.19822900  | -1.62338200 | 0.16389900  |
| H | 2.53671700  | -1.40219800 | 1.51933800  |
| C | 4.64144300  | 0.26147200  | -1.27283100 |
| H | 3.32488600  | 1.95341600  | -1.03659400 |
| C | 4.95676500  | -1.02658200 | -0.83974700 |
| H | 4.44084700  | -2.62591000 | 0.50871300  |
| H | 5.23362300  | 0.73458000  | -2.05278700 |
| H | 5.79394000  | -1.56089900 | -1.28272200 |
| C | 1.62625700  | 1.08623700  | 0.88587400  |
| H | 1.94752700  | 2.10134800  | 1.17177800  |
| H | 1.31541300  | 0.58334600  | 1.81415100  |
| H | -1.49122000 | 1.84473700  | 2.13548200  |
| C | -1.48506800 | 2.11527500  | -0.95784900 |
| H | -1.00094900 | 3.09029000  | -1.05528400 |
| H | -1.35537400 | 1.57994300  | -1.90556600 |
| H | -2.55321900 | 2.28251200  | -0.77976400 |
| N | -1.60905000 | 0.15712100  | 0.52302800  |
| C | -1.85392700 | -2.01979000 | 1.36163700  |
| C | -1.83149600 | -2.13758600 | -0.15569600 |
| C | -2.01322600 | -0.67970900 | -0.62215700 |
| C | -1.06977200 | -0.73970000 | 1.56306800  |
| H | -2.88092100 | -1.90737600 | 1.73450400  |
| H | -1.39949000 | -2.87706500 | 1.86647400  |
| H | -2.58849500 | -2.80668600 | -0.57604400 |
| H | -0.84836500 | -2.49490600 | -0.48700700 |
| H | -1.42795400 | -0.49998800 | -1.53346600 |
| H | -0.00125800 | -0.94880800 | 1.39313300  |
| H | -1.18091000 | -0.30244800 | 2.56153200  |
| C | -3.47396000 | -0.43187300 | -0.97864500 |
| O | -3.98455400 | -0.83306400 | -2.00370900 |
| O | -4.16699700 | 0.21929600  | -0.04848700 |
| H | -3.49298200 | 0.46792000  | 0.63475400  |

**EtOH-TS31-32**

|   |             |             |             |
|---|-------------|-------------|-------------|
| C | 0.70375100  | -1.11054100 | 0.07797100  |
| N | 0.90945500  | -1.86392600 | 1.31237100  |
| H | 0.35723200  | -2.71941400 | 1.30719800  |
| N | -0.71803100 | -0.83414100 | -0.17003900 |

|   |             |             |             |
|---|-------------|-------------|-------------|
| H | -0.81717000 | -0.14587700 | -0.91351900 |
| C | -2.96936300 | -0.14622900 | 0.38544800  |
| C | -3.35792700 | 1.19469200  | 0.37226600  |
| C | -3.83328800 | -1.10504100 | -0.15173100 |
| C | -4.58753400 | 1.57393100  | -0.16509500 |
| H | -2.69238100 | 1.94769600  | 0.79412100  |
| C | -5.06281600 | -0.73198800 | -0.68558200 |
| H | -3.53369100 | -2.15263600 | -0.14436300 |
| C | -5.44244600 | 0.61083100  | -0.69414400 |
| H | -4.87775800 | 2.62210200  | -0.16667500 |
| H | -5.72965200 | -1.48849500 | -1.09312400 |
| H | -6.40397600 | 0.90352500  | -1.10946900 |
| C | -1.63017900 | -0.55137000 | 0.93602900  |
| H | -1.74484500 | -1.46542400 | 1.53522100  |
| H | -1.27881700 | 0.23691200  | 1.62433600  |
| H | 0.61970000  | -1.32389300 | 2.12466500  |
| C | 1.17653900  | -1.98815200 | -1.07409500 |
| H | 0.63895700  | -2.93921600 | -1.01739400 |
| H | 0.94079600  | -1.53239000 | -2.04167900 |
| H | 2.24973300  | -2.19962600 | -1.02405400 |
| N | 1.52757900  | 0.10593100  | 0.19360000  |
| C | 2.10295200  | 2.31873300  | 0.69211500  |
| C | 2.60540600  | 2.01138600  | -0.71282700 |
| C | 2.55840900  | 0.47796700  | -0.76829200 |
| C | 0.99493600  | 1.29456600  | 0.86187200  |
| H | 2.89540600  | 2.14880200  | 1.43404000  |
| H | 1.74731600  | 3.34663800  | 0.80776600  |
| H | 3.60177400  | 2.40415200  | -0.93511500 |
| H | 1.90805000  | 2.41470000  | -1.45699100 |
| H | 2.35270100  | 0.14384900  | -1.79399000 |
| H | 0.06870200  | 1.65427200  | 0.37819000  |
| H | 0.76548900  | 1.09409200  | 1.91723000  |
| C | 3.91592400  | -0.12054200 | -0.39538700 |
| O | 4.91185000  | 0.03591600  | -1.07267100 |
| O | 3.94240900  | -0.82794900 | 0.73085400  |
| H | 3.01915200  | -0.83800400 | 1.08532900  |

#### **EtOH-TS32-33**

|   |             |             |             |
|---|-------------|-------------|-------------|
| C | -0.61269800 | -0.56871200 | 0.31423200  |
| N | -0.88713400 | -1.68254500 | -1.12756500 |
| H | -0.63391600 | -2.66003300 | -0.99363000 |
| N | 0.72433100  | -0.17554300 | 0.24144600  |
| H | 0.90311500  | 0.54212300  | -0.45377900 |
| C | 3.12953000  | -0.47511200 | 0.15032400  |
| C | 3.89808400  | -0.63300300 | -1.00279800 |
| C | 3.60382100  | 0.34780300  | 1.17655000  |
| C | 5.12577900  | 0.01623300  | -1.13063100 |
| H | 3.53415500  | -1.27314700 | -1.80556800 |
| C | 4.82655700  | 0.99870500  | 1.05134900  |
| H | 3.00545900  | 0.47201800  | 2.07839600  |
| C | 5.59095300  | 0.83350000  | -0.10421400 |
| H | 5.71685300  | -0.11716200 | -2.03353800 |
| H | 5.18740400  | 1.63337500  | 1.85734900  |

|   |             |             |             |
|---|-------------|-------------|-------------|
| H | 6.54832000  | 1.33997300  | -0.20145000 |
| C | 1.80045800  | -1.16302600 | 0.29200900  |
| H | 1.75799000  | -1.68014700 | 1.25867000  |
| H | 1.69639500  | -1.92881200 | -0.49509600 |
| H | -0.39962000 | -1.34041900 | -1.95402200 |
| C | -0.93629600 | -1.52133500 | 1.43518600  |
| H | -0.25880400 | -2.37729300 | 1.44003900  |
| H | -0.83682600 | -0.99300800 | 2.38950100  |
| H | -1.95585900 | -1.90411600 | 1.34609100  |
| N | -1.50619400 | 0.45384200  | 0.13459500  |
| C | -2.61001600 | 2.23485500  | -0.93615800 |
| C | -3.26964800 | 1.94031600  | 0.40588400  |
| C | -2.87428400 | 0.48435800  | 0.66759100  |
| C | -1.25571600 | 1.54853600  | -0.80905200 |
| H | -3.18749900 | 1.77690700  | -1.74846700 |
| H | -2.51345500 | 3.30320000  | -1.14920700 |
| H | -4.35479100 | 2.07244000  | 0.40517400  |
| H | -2.84368800 | 2.58320700  | 1.18718400  |
| H | -2.86789900 | 0.27522000  | 1.74493700  |
| H | -0.49977800 | 2.24059700  | -0.40576900 |
| H | -0.89088000 | 1.17306900  | -1.77690800 |
| C | -3.89977000 | -0.47910700 | 0.02018100  |
| O | -5.00008800 | -0.53406800 | 0.61101900  |
| O | -3.57593100 | -1.10403700 | -1.02957600 |
| H | -1.91607800 | -1.58750100 | -1.26350600 |

#### **EtOH-TS18-34**

|   |             |             |             |
|---|-------------|-------------|-------------|
| N | -0.32674700 | -0.93680900 | 0.39801400  |
| H | -0.83610800 | -1.49241100 | 1.08449300  |
| H | -0.12832100 | 0.80963900  | 0.65232300  |
| C | -2.51176300 | -0.26279700 | -0.47122200 |
| C | -3.47951200 | -1.13039900 | 0.04472100  |
| C | -2.83905800 | 1.08256500  | -0.65069500 |
| C | -4.74547100 | -0.66279100 | 0.38657400  |
| H | -3.24026800 | -2.18716100 | 0.16953200  |
| C | -4.10727300 | 1.55317300  | -0.31534800 |
| H | -2.09214200 | 1.76532000  | -1.05219600 |
| C | -5.06177400 | 0.68279200  | 0.20592100  |
| H | -5.48766600 | -1.35044000 | 0.78534500  |
| H | -4.35000000 | 2.60285900  | -0.46395800 |
| H | -6.05149300 | 1.05026900  | 0.46671700  |
| C | -1.14793100 | -0.79525300 | -0.81796800 |
| H | -0.62113300 | -0.11980600 | -1.50348200 |
| H | -1.28541700 | -1.75333900 | -1.34534100 |
| C | 3.96832900  | 0.45250300  | -0.93621000 |
| C | 3.72426300  | 0.91509500  | 0.49219100  |
| C | 2.22612800  | 0.69491300  | 0.66104300  |
| C | 3.08908600  | -0.78035800 | -1.01392700 |
| H | 3.62021900  | 1.21524600  | -1.64648400 |
| H | 5.01841900  | 0.23494700  | -1.15459800 |
| H | 4.01650100  | 1.94953300  | 0.69061400  |
| H | 4.26309500  | 0.26225600  | 1.19208900  |
| H | 1.98495100  | 0.42632100  | 1.69990000  |

|   |            |             |             |
|---|------------|-------------|-------------|
| H | 3.60021500 | -1.63512300 | -0.53237600 |
| H | 2.84615600 | -1.08076400 | -2.03665500 |
| N | 1.87297100 | -0.39235200 | -0.28136600 |
| C | 1.39766200 | 1.94068600  | 0.36333000  |
| O | 1.86113200 | 3.02490200  | 0.06727400  |
| O | 0.08441800 | 1.77557700  | 0.48636900  |
| C | 1.03218000 | -1.49506800 | 0.22766100  |
| C | 1.48848700 | -2.02298300 | 1.59053900  |
| H | 1.35802700 | -1.29203000 | 2.39364700  |
| H | 0.90835300 | -2.91342900 | 1.85846700  |
| H | 2.54777100 | -2.30419200 | 1.54614900  |
| N | 1.09568100 | -2.58281100 | -0.73961200 |
| H | 1.47472600 | -3.42825200 | -0.32864200 |
| H | 0.19626800 | -2.81193800 | -1.14361200 |

#### EtOH-TS34-35

|   |             |             |             |
|---|-------------|-------------|-------------|
| N | -0.37551200 | -0.91867100 | 0.31827200  |
| H | -0.82591200 | -1.26676700 | 1.16059900  |
| H | 0.22954800  | 0.94485900  | -0.57152200 |
| C | -2.61233200 | -0.34693100 | -0.43450800 |
| C | -3.57463500 | -1.08325000 | 0.26234800  |
| C | -2.87807200 | 0.99026900  | -0.73813200 |
| C | -4.77436600 | -0.49585600 | 0.65587400  |
| H | -3.38021300 | -2.13133500 | 0.49240200  |
| C | -4.07877500 | 1.58090200  | -0.35071000 |
| H | -2.13969600 | 1.57414700  | -1.28653300 |
| C | -5.02876900 | 0.83974400  | 0.34943100  |
| H | -5.51410000 | -1.08233900 | 1.19593100  |
| H | -4.27413700 | 2.62165400  | -0.59888400 |
| H | -5.96687400 | 1.29996200  | 0.65067800  |
| C | -1.31086000 | -0.99839300 | -0.81322600 |
| H | -0.86381900 | -0.49696500 | -1.68323900 |
| H | -1.50616200 | -2.03567000 | -1.12755900 |
| C | 4.06888800  | 0.35394200  | -0.66660400 |
| C | 3.66843100  | 0.76237300  | 0.74448900  |
| C | 2.14888100  | 0.67910300  | 0.66435300  |
| C | 3.12525700  | -0.80692500 | -0.92731600 |
| H | 3.87372400  | 1.17591300  | -1.37024100 |
| H | 5.12025000  | 0.06817500  | -0.76395500 |
| H | 4.01516900  | 1.75321600  | 1.04809100  |
| H | 4.03819900  | 0.02675500  | 1.47094200  |
| H | 1.69394800  | 0.48280300  | 1.64561300  |
| H | 3.54487900  | -1.71198700 | -0.44946600 |
| H | 2.98086000  | -1.02470500 | -1.99090700 |
| N | 1.85470300  | -0.40175800 | -0.29725900 |
| C | 1.53752000  | 2.00835400  | 0.22187200  |
| O | 1.99525500  | 3.09450700  | 0.51194800  |
| O | 0.41215500  | 1.90489400  | -0.48046000 |
| C | 0.96379200  | -1.48912900 | 0.16587200  |
| C | 1.39509500  | -2.07088000 | 1.51671800  |
| H | 1.28265000  | -1.35941700 | 2.34287700  |
| H | 0.78918100  | -2.95316100 | 1.75386800  |
| H | 2.44434500  | -2.38588200 | 1.47506000  |

|   |            |             |             |
|---|------------|-------------|-------------|
| N | 0.96529700 | -2.51169400 | -0.87957000 |
| H | 1.87462300 | -2.96519700 | -0.93025200 |
| H | 0.31252400 | -3.24433600 | -0.60828100 |

#### EtOH-TS35-36

|   |             |             |             |
|---|-------------|-------------|-------------|
| N | -0.31364300 | 1.19478800  | -0.22401900 |
| H | -0.81142300 | 1.92953100  | -0.71659300 |
| H | 1.82720200  | -0.09404600 | 1.77947500  |
| C | -2.45015900 | 0.19731600  | 0.32300200  |
| C | -3.57622800 | 1.02149600  | 0.34102900  |
| C | -2.55299200 | -1.07556300 | -0.24598000 |
| C | -4.78590000 | 0.58548100  | -0.19836100 |
| H | -3.50336100 | 2.01323600  | 0.78765300  |
| C | -3.75882600 | -1.51680900 | -0.78218100 |
| H | -1.67852900 | -1.72751600 | -0.25668000 |
| C | -4.87896500 | -0.68500600 | -0.76067900 |
| H | -5.65652100 | 1.23697200  | -0.17550700 |
| H | -3.82847600 | -2.51281200 | -1.21374300 |
| H | -5.82236300 | -1.03088600 | -1.17678600 |
| C | -1.13919300 | 0.68671200  | 0.87242300  |
| H | -0.61662000 | -0.13817200 | 1.37092100  |
| H | -1.32824100 | 1.44377700  | 1.65184600  |
| C | 3.82076700  | -0.78810400 | -0.95178300 |
| C | 2.55724300  | -1.55462400 | -1.32393100 |
| C | 1.49945500  | -0.91009000 | -0.41913300 |
| C | 3.29716400  | 0.63203200  | -0.81811100 |
| H | 4.21552300  | -1.14229100 | 0.01103900  |
| H | 4.61730600  | -0.87468000 | -1.69678600 |
| H | 2.62441100  | -2.63702600 | -1.18304000 |
| H | 2.29603900  | -1.36148300 | -2.37170500 |
| H | 0.50416500  | -0.92502400 | -0.88889000 |
| H | 3.23276200  | 1.09935500  | -1.81650600 |
| H | 3.94277700  | 1.26570500  | -0.19401900 |
| N | 1.97847600  | 0.44408100  | -0.20957200 |
| C | 1.36133900  | -1.69570300 | 0.88548000  |
| O | 1.00670900  | -2.85847200 | 0.91236100  |
| O | 1.64079600  | -1.03788800 | 2.00835300  |
| C | 1.06718100  | 1.58090900  | 0.01422200  |
| C | 1.38095200  | 2.73722600  | -0.93214200 |
| H | 1.22721800  | 2.44600900  | -1.97832800 |
| H | 0.72053600  | 3.58037200  | -0.69949100 |
| H | 2.41123600  | 3.08611900  | -0.81499200 |
| N | 1.26478600  | 1.95965300  | 1.42923800  |
| H | 2.22334500  | 2.28553400  | 1.54849300  |
| H | 0.66460800  | 2.74690700  | 1.67526600  |

#### EtOH-TS36-37

|   |             |             |             |
|---|-------------|-------------|-------------|
| N | -0.34756800 | 1.34063900  | -0.22517500 |
| H | -0.81197300 | 2.22249000  | -0.41681700 |
| H | 1.70145200  | 0.96902000  | 1.90171700  |
| C | -2.41466900 | 0.16075800  | 0.31933900  |
| C | -3.50069900 | 1.03846200  | 0.35106700  |
| C | -2.59132600 | -1.11909100 | -0.21090900 |

|   |             |             |             |
|---|-------------|-------------|-------------|
| C | -4.74107100 | 0.64950800  | -0.14971500 |
| H | -3.37434700 | 2.03334900  | 0.77906500  |
| C | -3.83054900 | -1.51246700 | -0.70942600 |
| H | -1.75354100 | -1.81679500 | -0.21983400 |
| C | -4.90683200 | -0.62690800 | -0.68308300 |
| H | -5.57989100 | 1.34084800  | -0.11751900 |
| H | -3.95796700 | -2.51355100 | -1.11477100 |
| H | -5.87527500 | -0.93489100 | -1.07010800 |
| C | -1.06914800 | 0.60404200  | 0.82227900  |
| H | -0.48216900 | -0.25995300 | 1.13775000  |
| H | -1.19932000 | 1.23835500  | 1.71385400  |
| C | 3.68904200  | -0.95227000 | -0.98319800 |
| C | 2.40596500  | -1.70978100 | -1.30787800 |
| C | 1.37577700  | -1.00014700 | -0.42879700 |
| C | 3.22861900  | 0.49845500  | -0.85917900 |
| H | 4.10049700  | -1.30393100 | -0.02926500 |
| H | 4.46587800  | -1.07031400 | -1.74410600 |
| H | 2.45981500  | -2.78040000 | -1.09359100 |
| H | 2.13854900  | -1.57961000 | -2.36435900 |
| H | 0.36050500  | -1.12624400 | -0.82778800 |
| H | 3.38486600  | 1.04942200  | -1.79657800 |
| H | 3.76535900  | 1.03029000  | -0.06022100 |
| N | 1.78954800  | 0.39609100  | -0.57114600 |
| C | 1.41058300  | -1.56890400 | 1.01315200  |
| O | 0.94864600  | -2.72549100 | 1.13008800  |
| O | 1.88858600  | -0.84749400 | 1.93322800  |
| C | 1.03905000  | 1.49457100  | -0.26611600 |
| C | 1.44463300  | 2.77451200  | -0.95454000 |
| H | 1.20206500  | 2.69542800  | -2.02030600 |
| H | 0.90268800  | 3.62251100  | -0.52614800 |
| H | 2.51337800  | 2.97402900  | -0.86043100 |
| N | 1.53920500  | 1.91183900  | 1.50118600  |
| H | 2.40393100  | 2.44718300  | 1.54308900  |
| H | 0.83309600  | 2.42222400  | 2.02780200  |

#### EtOH-TS24-38

|   |             |             |             |
|---|-------------|-------------|-------------|
| N | 0.69608700  | -0.08341000 | 0.42040700  |
| H | 0.93137800  | 0.57305400  | -0.31663800 |
| C | 3.07623100  | -0.49852200 | 0.24750500  |
| C | 3.59628500  | -0.65103700 | -1.03934300 |
| C | 3.78983100  | 0.25124700  | 1.18558300  |
| C | 4.81360600  | -0.06757600 | -1.38445500 |
| H | 3.04236700  | -1.23692300 | -1.77285400 |
| C | 5.00658600  | 0.83534800  | 0.84456900  |
| H | 3.38433300  | 0.37345100  | 2.18952300  |
| C | 5.52050000  | 0.67593900  | -0.44181700 |
| H | 5.21263000  | -0.19745800 | -2.38768100 |
| H | 5.55663200  | 1.41291500  | 1.58373500  |
| H | 6.47269400  | 1.12875100  | -0.70780600 |
| C | 1.74427200  | -1.09470700 | 0.60111700  |
| H | 1.74775800  | -1.41911800 | 1.64918700  |
| H | 1.54793200  | -1.97749300 | -0.02606900 |
| C | -2.34011000 | 2.70948400  | -0.15753600 |



|   |             |             |             |
|---|-------------|-------------|-------------|
| C | -3.52805800 | 1.76278600  | -0.14768400 |
| C | -2.97665200 | 0.45924200  | 0.46361300  |
| C | -1.18549800 | 1.78558400  | -0.50093700 |
| H | -2.45131400 | 3.52812100  | -0.87392000 |
| H | -2.18033100 | 3.14147700  | 0.83836200  |
| H | -3.85212500 | 1.56974100  | -1.18033600 |
| H | -4.39403500 | 2.12918900  | 0.40885700  |
| H | -3.17979100 | 0.42684500  | 1.54431500  |
| H | -0.22720200 | 2.18885700  | -0.15757200 |
| H | -1.12422300 | 1.60394200  | -1.58839700 |
| N | -1.53002900 | 0.56165800  | 0.22600900  |
| C | -3.75880000 | -0.69512900 | -0.17027500 |
| O | -4.92929900 | -0.82511700 | 0.18204900  |
| O | -3.20461300 | -1.42532900 | -1.08584400 |
| C | -0.63923900 | -0.46416700 | 0.42982400  |
| C | -1.00635800 | -1.44591800 | 1.50938500  |
| H | -2.03513800 | -1.79640800 | 1.41036000  |
| H | -0.36030400 | -2.32385000 | 1.47669300  |
| H | -0.89733800 | -0.95294400 | 2.48167300  |
| O | -0.81755200 | -1.54118700 | -0.96150600 |
| H | -0.36953000 | -1.11071200 | -1.70361500 |
| H | -2.05065700 | -1.45155400 | -1.10761900 |

#### EtOH-TS38-39

|   |             |             |             |
|---|-------------|-------------|-------------|
| N | 0.72966400  | -0.10535200 | 0.20073700  |
| H | 0.94185400  | 0.14436700  | -0.76588400 |
| C | 3.13288000  | -0.45351300 | 0.28820500  |
| C | 3.90790000  | -1.05931400 | -0.70123200 |
| C | 3.61379800  | 0.70153300  | 0.91293000  |
| C | 5.14600600  | -0.52603600 | -1.05908900 |
| H | 3.53851500  | -1.95853100 | -1.19304800 |
| C | 4.84686600  | 1.23821000  | 0.55734200  |
| H | 3.00986600  | 1.17728400  | 1.68490300  |
| C | 5.61665000  | 0.62401000  | -0.43148600 |
| H | 5.74110700  | -1.01043500 | -1.82981100 |
| H | 5.21171000  | 2.13494800  | 1.05308800  |
| H | 6.58177700  | 1.04130800  | -0.70911600 |
| C | 1.78969000  | -1.01139700 | 0.66521400  |
| H | 1.72386600  | -1.09545100 | 1.75770800  |
| H | 1.67918000  | -2.02583400 | 0.24481200  |
| C | -2.39603400 | 2.72937100  | -0.22645200 |
| C | -3.52663200 | 1.72903000  | -0.42866200 |
| C | -2.97105100 | 0.45894000  | 0.20844400  |
| C | -1.11706300 | 1.88655200  | -0.25627200 |
| H | -2.38973600 | 3.51112000  | -0.99035800 |
| H | -2.49949900 | 3.22104700  | 0.74716800  |
| H | -3.71227700 | 1.54540600  | -1.49530100 |
| H | -4.47006200 | 2.02757200  | 0.03319400  |
| H | -2.96617500 | 0.57962300  | 1.30440800  |
| H | -0.48981100 | 2.03508800  | 0.62830500  |
| H | -0.50057900 | 2.07470300  | -1.13928500 |
| N | -1.56135800 | 0.46048200  | -0.27827000 |
| C | -3.87009100 | -0.74334500 | -0.08416600 |

|   |             |             |             |
|---|-------------|-------------|-------------|
| O | -5.04972500 | -0.63992000 | 0.19828200  |
| O | -3.38612300 | -1.84630100 | -0.61248000 |
| C | -0.60122900 | -0.65104600 | 0.22528800  |
| C | -0.94395900 | -1.21053400 | 1.58511700  |
| H | -1.98193000 | -1.54394000 | 1.64379900  |
| H | -0.32628600 | -2.09031500 | 1.78577000  |
| H | -0.76285600 | -0.46616200 | 2.36923700  |
| O | -0.87879200 | -1.49862000 | -0.85677400 |
| H | -1.38859100 | -0.34692200 | -1.21867700 |
| H | -2.36748200 | -1.83682800 | -0.73149700 |

**EtOH-TS27-40**

|   |             |             |             |
|---|-------------|-------------|-------------|
| C | 4.20676100  | 0.10748600  | -0.23669400 |
| C | 3.49191000  | -0.91644500 | -1.11278600 |
| C | 2.05303500  | -0.80725700 | -0.61282200 |
| C | 3.19362300  | 1.24463600  | -0.08994600 |
| H | 4.42656600  | -0.33308700 | 0.74447100  |
| H | 5.15357100  | 0.45368400  | -0.65978000 |
| H | 3.88627700  | -1.93054000 | -1.01749900 |
| H | 3.52526300  | -0.62216900 | -2.16833600 |
| H | 1.34350600  | -1.20349600 | -1.34868500 |
| H | 3.42204600  | 2.08371700  | -0.75891400 |
| H | 3.16662900  | 1.62981700  | 0.94004900  |
| N | 1.90661800  | 0.63923500  | -0.47551400 |
| C | 1.88416200  | -1.61532300 | 0.68952500  |
| O | 2.17084100  | -2.80906900 | 0.67021500  |
| O | 1.45794800  | -1.00588700 | 1.75447500  |
| C | 0.72220800  | 1.30844000  | -0.28631100 |
| C | 0.80426100  | 2.80774800  | -0.41379700 |
| H | -0.14509900 | 3.25856400  | -0.11246400 |
| H | 1.59389000  | 3.23387200  | 0.20776400  |
| H | 1.01026100  | 3.06884600  | -1.45745200 |
| N | -0.42243100 | 0.80261100  | -0.88430900 |
| H | -1.13478400 | 1.51987200  | -0.95384100 |
| C | -2.50084100 | -0.36407500 | -0.31372300 |
| C | -2.94179100 | 0.37953800  | 0.78694500  |
| C | -3.44152500 | -0.97037600 | -1.14593500 |
| C | -4.30174500 | 0.50990300  | 1.04828200  |
| H | -2.20324700 | 0.84970200  | 1.43690200  |
| C | -4.80526200 | -0.84257700 | -0.88390400 |
| H | -3.10368500 | -1.54773700 | -2.00550700 |
| C | -5.23713000 | -0.10172100 | 0.21251800  |
| H | -4.63449900 | 1.08595000  | 1.90875400  |
| H | -5.52927000 | -1.31930100 | -1.54056000 |
| H | -6.30022500 | -0.00018900 | 0.41782300  |
| C | -1.02728000 | -0.50469900 | -0.58584800 |
| H | -0.87632300 | -1.19915200 | -1.42288100 |
| H | -0.55124800 | -0.94307400 | 0.29856800  |
| O | 0.38886300  | 1.13017400  | 1.45972800  |
| H | 0.99473200  | 0.04786800  | 1.65110100  |
| H | 0.82278400  | 1.84052800  | 1.95088100  |

**EtOH-TS40-41**

|   |             |             |             |
|---|-------------|-------------|-------------|
| C | -4.10096800 | 1.13641800  | 0.58232100  |
| C | -3.53813800 | -0.04983500 | 1.35270100  |
| C | -2.34477600 | -0.47845800 | 0.50469900  |
| C | -2.83202300 | 1.84553100  | 0.15122600  |
| H | -4.66395600 | 0.79387200  | -0.29690400 |
| H | -4.75623100 | 1.77665900  | 1.17987500  |
| H | -4.24499200 | -0.86956600 | 1.49793700  |
| H | -3.18342700 | 0.27868400  | 2.33754100  |
| H | -1.49671600 | -0.79203000 | 1.13657400  |
| H | -2.39479200 | 2.38810400  | 1.00322400  |
| H | -2.96175300 | 2.54279600  | -0.68078600 |
| N | -1.92135200 | 0.74426900  | -0.23817400 |
| C | -2.64339500 | -1.65251900 | -0.42562500 |
| O | -3.61265300 | -2.36930200 | -0.29117600 |
| O | -1.74449000 | -1.91290000 | -1.37290700 |
| C | -0.31182800 | 0.96237900  | -0.29534100 |
| C | -0.03810900 | 2.44568300  | -0.40174200 |
| H | 1.00905500  | 2.56163300  | -0.70250400 |
| H | -0.66804900 | 2.90665500  | -1.16815300 |
| H | -0.18824700 | 2.96885000  | 0.54974200  |
| N | 0.36954800  | 0.37604700  | 0.79576800  |
| H | 0.76126100  | 1.06076000  | 1.43175000  |
| C | 2.65287200  | -0.51086000 | 0.36628500  |
| C | 3.03383100  | 0.04424400  | -0.86095100 |
| C | 3.63473200  | -0.76757700 | 1.32428300  |
| C | 4.37011400  | 0.33225900  | -1.12051000 |
| H | 2.26721900  | 0.24288800  | -1.60995700 |
| C | 4.97496400  | -0.47901600 | 1.06727000  |
| H | 3.34608800  | -1.20028900 | 2.28191200  |
| C | 5.34533700  | 0.07139400  | -0.15638600 |
| H | 4.65545000  | 0.75801400  | -2.08015100 |
| H | 5.72844200  | -0.68362200 | 1.82462600  |
| H | 6.38946200  | 0.29666200  | -0.36134900 |
| C | 1.20412200  | -0.81341900 | 0.65969100  |
| H | 1.13469900  | -1.39733200 | 1.58752200  |
| H | 0.78462800  | -1.43621800 | -0.13705900 |
| O | -0.21779800 | 0.30256200  | -1.50682200 |
| H | -1.02275400 | -1.22750200 | -1.42675200 |
| H | -1.47363700 | 0.50854300  | -1.39053400 |

#### EtOH-TS33-42

|   |             |             |             |
|---|-------------|-------------|-------------|
| C | -0.61322600 | -0.51126500 | 0.51090700  |
| N | 0.70580800  | -0.12491600 | 0.37966100  |
| H | 0.89805400  | 0.53389800  | -0.36793500 |
| C | 3.10573900  | -0.44694400 | 0.22219200  |
| C | 3.80842800  | -0.82797200 | -0.92124000 |
| C | 3.63189300  | 0.55575600  | 1.04272400  |
| C | 5.02268900  | -0.22162600 | -1.24033700 |
| H | 3.40292300  | -1.60795500 | -1.56432100 |
| C | 4.84118000  | 1.16519300  | 0.72499100  |
| H | 3.08492200  | 0.85374700  | 1.93671000  |
| C | 5.53996800  | 0.77564400  | -0.41802600 |
| H | 5.56373400  | -0.52893800 | -2.13210300 |

|   |             |             |             |
|---|-------------|-------------|-------------|
| H | 5.24322300  | 1.94128800  | 1.37193200  |
| H | 6.48722200  | 1.24937400  | -0.66455800 |
| C | 1.79261000  | -1.09128700 | 0.56486000  |
| H | 1.80158100  | -1.40989000 | 1.61478400  |
| H | 1.63750600  | -1.98695300 | -0.05518600 |
| C | -0.91990000 | -1.42083900 | 1.66583200  |
| H | -0.79619400 | -0.86310200 | 2.60054700  |
| H | -1.94250100 | -1.79923300 | 1.61026200  |
| H | -0.25427100 | -2.28431900 | 1.66844400  |
| N | -1.52259300 | 0.49188200  | 0.28701700  |
| C | -3.29886200 | 1.89672600  | 0.30438100  |
| C | -2.94364400 | 0.44845700  | 0.60924100  |
| C | -1.28802800 | 1.56332700  | -0.68631900 |
| H | -4.35528400 | 2.04846200  | 0.08046200  |
| H | -2.98535900 | 2.55512800  | 1.12753400  |
| H | -3.10525900 | 0.22347100  | 1.67034700  |
| H | -0.55342700 | 2.28253300  | -0.28627400 |
| H | -0.94293900 | 1.18170500  | -1.66028200 |
| C | -3.82751200 | -0.50449200 | -0.22021400 |
| O | -5.04292400 | -0.40318400 | -0.07176800 |
| O | -3.26708400 | -1.35002500 | -1.01905200 |
| O | -0.90733800 | -1.69996000 | -0.79247300 |
| H | -2.10516300 | -1.50577400 | -0.96286800 |
| H | -0.41412400 | -1.42010100 | -1.57614100 |
| O | -2.53954800 | 2.16364900  | -0.87071300 |

#### EtOH-TS42-43

|   |             |             |             |
|---|-------------|-------------|-------------|
| C | -0.63118700 | -1.05520100 | -0.04056400 |
| N | 0.73720200  | -0.69629300 | -0.21725900 |
| H | 1.09567500  | -1.14935000 | -1.05229200 |
| C | 3.02798400  | -0.23419400 | 0.42451700  |
| C | 4.05534900  | -1.14731800 | 0.18433700  |
| C | 3.26114000  | 1.12441600  | 0.19115200  |
| C | 5.29690800  | -0.71425700 | -0.27994800 |
| H | 3.87997800  | -2.20723700 | 0.36618600  |
| C | 4.49834800  | 1.56120300  | -0.27065500 |
| H | 2.46583200  | 1.84501300  | 0.38004600  |
| C | 5.52012800  | 0.64090300  | -0.50777000 |
| H | 6.08929400  | -1.43690000 | -0.46051500 |
| H | 4.66950600  | 2.62144100  | -0.44240500 |
| H | 6.48812000  | 0.98255500  | -0.86685700 |
| C | 1.68219300  | -0.70966400 | 0.89673700  |
| H | 1.30804700  | -0.03889000 | 1.68306400  |
| H | 1.79024100  | -1.70921500 | 1.35045200  |
| C | -0.95081000 | -1.77787500 | 1.24465300  |
| H | -0.71068900 | -1.18176700 | 2.13278300  |
| H | -2.00228700 | -2.07363800 | 1.28646500  |
| H | -0.35324400 | -2.69492100 | 1.27487100  |
| N | -1.50752300 | 0.27253600  | -0.24537200 |
| C | -2.98785500 | 1.95215900  | 0.52703700  |
| C | -2.80157900 | 0.42275200  | 0.45701900  |
| C | -0.87837200 | 1.60277900  | -0.15086500 |
| H | -3.95126400 | 2.27835700  | 0.13062800  |

|   |             |             |             |
|---|-------------|-------------|-------------|
| H | -2.88226600 | 2.30472800  | 1.56145900  |
| H | -2.71560100 | 0.02382100  | 1.47840200  |
| H | -0.38391100 | 1.70042000  | 0.83357400  |
| H | -0.15925400 | 1.76437700  | -0.95407300 |
| C | -3.98151900 | -0.31791600 | -0.16804300 |
| O | -5.11152300 | 0.09094200  | -0.00112900 |
| O | -3.75184200 | -1.44984100 | -0.81336800 |
| O | -1.13575700 | -1.63572600 | -1.18853700 |
| H | -2.78072200 | -1.67900700 | -0.94118000 |
| H | -1.53089700 | -0.39953800 | -1.29304000 |
| O | -1.94946400 | 2.48579200  | -0.28131400 |

#### EtOH-TS37-44

|   |             |             |             |
|---|-------------|-------------|-------------|
| N | -0.47759900 | 0.80605400  | -0.59656300 |
| H | -1.17936900 | 1.53634500  | -0.53977500 |
| H | 1.26545000  | 0.16993100  | 1.72976900  |
| C | -2.54337100 | -0.36951500 | -0.10078000 |
| C | -3.20419400 | 0.30055600  | 0.93302700  |
| C | -3.29077100 | -0.91618200 | -1.14464800 |
| C | -4.59069300 | 0.42022500  | 0.92413900  |
| H | -2.62237600 | 0.72542400  | 1.75151500  |
| C | -4.67933900 | -0.79985300 | -1.15542700 |
| H | -2.77911000 | -1.43915100 | -1.95165500 |
| C | -5.33050700 | -0.13090200 | -0.12156900 |
| H | -5.09582800 | 0.93827200  | 1.73595100  |
| H | -5.25257000 | -1.23331800 | -1.97151200 |
| H | -6.41416100 | -0.04163000 | -0.12804400 |
| C | -1.04393100 | -0.46137000 | -0.09474500 |
| H | -0.73321500 | -1.30102700 | -0.72710300 |
| H | -0.69628400 | -0.65614500 | 0.92831000  |
| C | 4.19055800  | 0.03554300  | -0.49301100 |
| C | 3.37483500  | -1.01904700 | -1.23197200 |
| C | 1.98787700  | -0.84013200 | -0.61584400 |
| C | 3.22600000  | 1.21236900  | -0.35291200 |
| H | 4.47464300  | -0.34099200 | 0.49806300  |
| H | 5.10904300  | 0.31674900  | -1.01495600 |
| H | 3.75146700  | -2.03721800 | -1.10992100 |
| H | 3.32039700  | -0.79104900 | -2.30309300 |
| H | 1.21296500  | -1.24502100 | -1.27588900 |
| H | 3.39752600  | 1.97587900  | -1.12255600 |
| H | 3.31767800  | 1.69464200  | 0.63085400  |
| N | 1.88947700  | 0.61498000  | -0.53628200 |
| C | 1.90883600  | -1.58683200 | 0.72929800  |
| O | 2.08601800  | -2.80237100 | 0.72046100  |
| O | 1.68336600  | -0.90927500 | 1.81286900  |
| C | 0.75751400  | 1.32076500  | -0.21926700 |
| C | 0.84034300  | 2.80595400  | -0.45753000 |
| H | 0.88980800  | 2.99089400  | -1.53604800 |
| H | -0.04417500 | 3.30190400  | -0.04968800 |
| H | 1.72331100  | 3.25018100  | 0.00511800  |
| H | 1.21089600  | 1.98417300  | 1.94699100  |
| O | 0.68584200  | 1.26470200  | 1.57179900  |

**EtOH-TS44-45**

|   |             |             |             |
|---|-------------|-------------|-------------|
| N | -0.44956200 | 0.96264900  | -0.08912700 |
| H | -0.96732800 | 1.54600600  | -0.73842900 |
| H | 1.35021000  | -0.16438200 | 2.03843100  |
| C | -2.62857900 | -0.00712400 | 0.34813500  |
| C | -3.74053600 | 0.83604700  | 0.38393800  |
| C | -2.73946700 | -1.24771400 | -0.28595200 |
| C | -4.94612000 | 0.44691400  | -0.19771800 |
| H | -3.65984200 | 1.80344600  | 0.87921800  |
| C | -3.94143800 | -1.64112000 | -0.86669600 |
| H | -1.87594800 | -1.91226100 | -0.31438700 |
| C | -5.04827800 | -0.79305900 | -0.82337700 |
| H | -5.80659600 | 1.11077400  | -0.15824200 |
| H | -4.01828700 | -2.61269100 | -1.34949300 |
| H | -5.98909000 | -1.10212400 | -1.27280800 |
| C | -1.32670000 | 0.42917400  | 0.95784700  |
| H | -0.84054600 | -0.42982800 | 1.43780500  |
| H | -1.51102100 | 1.17404900  | 1.74699400  |
| C | 3.66974800  | -0.20847900 | -1.65776500 |
| C | 2.56378200  | -1.24831700 | -1.54551700 |
| C | 1.78382200  | -0.80112800 | -0.31137800 |
| C | 2.92855400  | 1.06431400  | -1.30058300 |
| H | 4.46109900  | -0.40497700 | -0.92142800 |
| H | 4.12866300  | -0.16140300 | -2.64932200 |
| H | 2.92199500  | -2.27475700 | -1.44094500 |
| H | 1.91204600  | -1.19873500 | -2.42616700 |
| H | 0.69767500  | -0.91553400 | -0.46452100 |
| H | 2.29736100  | 1.38736500  | -2.14215500 |
| H | 3.57290500  | 1.89586400  | -1.00334000 |
| N | 2.06167400  | 0.66006600  | -0.16877700 |
| C | 2.12428700  | -1.59500100 | 0.94991300  |
| O | 2.66439100  | -2.68080300 | 0.90920300  |
| O | 1.73564000  | -1.08402200 | 2.11492500  |
| C | 0.79508300  | 1.54703400  | 0.27277600  |
| C | 0.94849200  | 2.93791900  | -0.29999000 |
| H | 0.76471800  | 2.96861500  | -1.38009300 |
| H | 0.21416700  | 3.57953400  | 0.19852500  |
| H | 1.94455300  | 3.33971400  | -0.09314300 |
| H | 2.19133000  | 1.04548000  | 1.01871600  |
| O | 1.13387400  | 1.47108500  | 1.61316300  |

**H<sub>2</sub>O-5a**

|   |             |            |             |
|---|-------------|------------|-------------|
| C | -0.75702400 | 2.58933000 | -0.26771600 |
| C | -1.76490300 | 1.43661800 | -0.16241500 |
| C | -0.93343200 | 0.25682800 | 0.36503500  |
| C | 0.59983400  | 1.95076400 | 0.02742800  |
| H | -0.77230100 | 3.02803600 | -1.27029500 |
| H | -0.97168700 | 3.39330600 | 0.44275800  |
| H | -2.17301900 | 1.18395600 | -1.14897800 |
| H | -2.60916900 | 1.64510400 | 0.50004100  |
| H | -0.90441700 | 0.31142700 | 1.46896400  |
| H | 0.88591700  | 2.13281300 | 1.08136200  |
| H | 1.39726200  | 2.34533300 | -0.60770700 |

|   |             |             |             |
|---|-------------|-------------|-------------|
| N | 0.38795500  | 0.51642800  | -0.21623900 |
| C | -1.65867400 | -1.03409800 | 0.04615700  |
| O | -2.73944400 | -1.25086400 | 0.56411400  |
| O | -1.16170300 | -1.88229600 | -0.84131800 |
| H | -0.20327600 | -1.70783100 | -1.02920600 |
| C | 1.47990300  | -0.39836300 | 0.07868700  |
| C | 2.83977800  | 0.27514700  | -0.01776000 |
| H | 2.97042100  | 1.02645500  | 0.76730700  |
| H | 3.60893100  | -0.49302900 | 0.10902400  |
| H | 2.98780800  | 0.75797700  | -0.99121100 |
| N | 1.25211100  | -1.09262400 | 1.32760900  |
| H | 2.01690000  | -1.74038600 | 1.50202400  |
| H | 1.24111100  | -0.42612500 | 2.09706400  |
| O | 1.45614000  | -1.46425900 | -0.89552000 |
| H | 1.77221100  | -1.10166900 | -1.73543900 |

### H<sub>2</sub>O-5b

|   |             |             |             |
|---|-------------|-------------|-------------|
| C | -0.78568600 | 2.56861000  | -0.27193100 |
| C | -1.78483300 | 1.42307300  | -0.07465700 |
| C | -0.91699400 | 0.22309500  | 0.35124700  |
| C | 0.57277000  | 1.94927400  | 0.02624900  |
| H | -0.82037600 | 2.93590500  | -1.30286800 |
| H | -0.98575700 | 3.41986700  | 0.38567200  |
| H | -2.30727400 | 1.19037200  | -1.00968200 |
| H | -2.54770500 | 1.62716600  | 0.68085900  |
| H | -0.83835100 | 0.23319800  | 1.45590500  |
| H | 0.84572000  | 2.09534200  | 1.08798900  |
| H | 1.37321300  | 2.37709000  | -0.57940300 |
| N | 0.38719800  | 0.51513400  | -0.26711800 |
| C | -1.67230500 | -1.05325900 | 0.01910100  |
| O | -2.79003000 | -1.20964200 | 0.47606800  |
| O | -1.14226100 | -1.96828500 | -0.77497300 |
| H | -0.17399600 | -1.80709100 | -0.93530800 |
| C | 1.52593700  | -0.34743000 | 0.06044800  |
| O | 1.43979900  | -1.51602700 | -0.80386400 |
| H | 1.69123000  | -1.23106400 | -1.69516900 |
| N | 2.74010100  | 0.37302600  | -0.17260300 |
| H | 3.53611200  | -0.24308600 | -0.03774200 |
| H | 2.78422700  | 0.75128900  | -1.11610400 |
| C | 1.53542900  | -0.90721900 | 1.47078100  |
| H | 1.47389100  | -0.09393900 | 2.20095800  |
| H | 0.70552300  | -1.60055300 | 1.63730100  |
| H | 2.46647500  | -1.45684100 | 1.64036300  |

### H<sub>2</sub>O-IM1

|   |             |            |             |
|---|-------------|------------|-------------|
| C | 0.97144100  | 2.02673800 | 1.12971000  |
| C | 1.41955000  | 1.84836000 | -0.31546000 |
| C | 0.81323200  | 0.51201000 | -0.72778300 |
| C | -0.45556200 | 1.52101000 | 1.08746600  |
| H | 1.57404800  | 1.40193600 | 1.80453100  |
| H | 1.03023300  | 3.05944500 | 1.48266600  |
| H | 2.50423500  | 1.83019100 | -0.44380800 |
| H | 1.01121900  | 2.65521800 | -0.93582700 |

|   |             |             |             |
|---|-------------|-------------|-------------|
| H | 0.40335600  | 0.55062400  | -1.74359100 |
| H | -1.12337500 | 2.22477400  | 0.57850600  |
| H | -0.87600400 | 1.23663900  | 2.05602100  |
| N | -0.35233300 | 0.29753700  | 0.22606200  |
| C | 1.75239200  | -0.71888100 | -0.67811300 |
| O | 2.95104200  | -0.53411600 | -0.92313300 |
| O | 1.17632300  | -1.82634400 | -0.42700800 |
| H | -0.50997600 | -1.68987200 | -0.88694100 |
| C | -1.67874800 | -0.15366300 | -0.45852200 |
| C | -2.66552600 | -0.45625000 | 0.65028700  |
| H | -2.98369200 | 0.44848100  | 1.17825700  |
| H | -3.54461700 | -0.92148500 | 0.19479400  |
| H | -2.23325400 | -1.15982000 | 1.36987800  |
| N | -2.11634200 | 0.88611800  | -1.31876700 |
| H | -1.99299300 | 0.63858600  | -2.29391800 |
| H | -3.07165100 | 1.17687200  | -1.14999100 |
| O | -1.35979200 | -1.28494100 | -1.19634400 |
| H | -0.09478100 | -0.47363500 | 0.87137400  |
| O | 0.29667600  | -1.73738100 | 2.17578300  |
| H | 0.87222400  | -1.55486700 | 2.92706500  |
| H | 0.86109200  | -2.12234400 | 1.48001800  |

#### H<sub>2</sub>O-6a

|   |             |             |             |
|---|-------------|-------------|-------------|
| C | -1.01693800 | 2.09882400  | -0.27927200 |
| C | -1.46496600 | 1.23950100  | 0.89699700  |
| C | -0.71112100 | -0.06556400 | 0.69805700  |
| C | 0.46983600  | 1.80159600  | -0.36730900 |
| H | -1.52280200 | 1.77159800  | -1.19521000 |
| H | -1.20929100 | 3.16578400  | -0.13941800 |
| H | -2.54360000 | 1.06991100  | 0.92103000  |
| H | -1.15869200 | 1.70382700  | 1.84315300  |
| H | -0.44539200 | -0.54726400 | 1.64959600  |
| H | 1.04481800  | 2.42825200  | 0.32851400  |
| H | 0.88451700  | 1.92324700  | -1.37255300 |
| N | 0.55605900  | 0.38975000  | 0.06127300  |
| C | -1.43402300 | -1.13165300 | -0.17618900 |
| O | -2.49626100 | -0.81568700 | -0.74123300 |
| O | -0.85245900 | -2.25514300 | -0.21294200 |
| C | 1.68276700  | -0.30229000 | 0.05690500  |
| C | 2.95235000  | 0.35197600  | -0.35925500 |
| H | 3.08833500  | 1.31313800  | 0.14418900  |
| H | 3.80748800  | -0.28906600 | -0.13905300 |
| H | 2.93526600  | 0.53961100  | -1.43862700 |
| N | 1.68657100  | -1.57449800 | 0.42668400  |
| H | 0.78544800  | -2.08870000 | 0.39386900  |
| H | 2.55782600  | -2.08480300 | 0.40260600  |

#### H<sub>2</sub>O-6c

|   |             |            |             |
|---|-------------|------------|-------------|
| C | 1.21300200  | 1.92604800 | 0.79341900  |
| C | 1.72470300  | 1.47778300 | -0.56962700 |
| C | 0.88506500  | 0.24334900 | -0.85370500 |
| C | -0.29152100 | 1.77172500 | 0.65325000  |
| H | 1.58930600  | 1.25334500 | 1.57596200  |



|   |             |             |             |
|---|-------------|-------------|-------------|
| H | 1.49536400  | 2.94873400  | 1.05600700  |
| H | 2.78898200  | 1.23591200  | -0.57995500 |
| H | 1.52691900  | 2.25046800  | -1.32339100 |
| H | 0.72699200  | 0.07403600  | -1.92901400 |
| H | -0.74094900 | 2.65863400  | 0.18635900  |
| H | -0.80627000 | 1.56873900  | 1.59746900  |
| N | -0.42607900 | 0.61547900  | -0.25779000 |
| C | 1.45777400  | -1.08070900 | -0.27403200 |
| O | 2.66023100  | -1.11800000 | 0.02664700  |
| O | 0.62296000  | -2.03594300 | -0.20721600 |
| H | -0.39446500 | -1.72797900 | 1.30325500  |
| C | -1.59374400 | 0.09662800  | -0.58338500 |
| C | -2.84801200 | 0.73383200  | -0.10403800 |
| H | -2.85501700 | 1.80768400  | -0.30966100 |
| H | -3.71964900 | 0.27488600  | -0.57325600 |
| H | -2.92753900 | 0.59608700  | 0.98041100  |
| N | -1.65979000 | -0.99078600 | -1.34364600 |
| H | -0.85114400 | -1.62141500 | -1.31518500 |
| H | -2.56771800 | -1.38117900 | -1.55266100 |
| O | -0.92272600 | -1.38241900 | 2.05141800  |
| H | -0.83106000 | -2.03184300 | 2.75562100  |

#### H<sub>2</sub>O-6c-no-Hbond

|   |             |             |             |
|---|-------------|-------------|-------------|
| C | 0.57452100  | 2.23771300  | 0.31218000  |
| C | 1.27496400  | 1.44557100  | -0.78767000 |
| C | 0.68227900  | 0.03398300  | -0.64957500 |
| C | -0.83703900 | 1.67750600  | 0.27913900  |
| H | 1.03824400  | 2.04418700  | 1.28892300  |
| H | 0.59704000  | 3.31727300  | 0.14105700  |
| H | 2.36627000  | 1.44573500  | -0.71394900 |
| H | 1.00465800  | 1.84598500  | -1.77137700 |
| H | 0.56016400  | -0.45955700 | -1.62174100 |
| H | -1.42666300 | 2.14973000  | -0.52199100 |
| H | -1.37536600 | 1.80391400  | 1.22376700  |
| N | -0.61301200 | 0.25160900  | -0.01060100 |
| C | 1.59120100  | -0.87336100 | 0.16451800  |
| O | 2.63090500  | -1.31345400 | -0.27683200 |
| O | 1.21136300  | -1.13494800 | 1.41653900  |
| C | -1.62966900 | -0.66372800 | -0.21060100 |
| C | -2.98979200 | -0.23017400 | 0.24769400  |
| H | -3.32613300 | 0.65821400  | -0.29881200 |
| H | -3.71660300 | -1.02942400 | 0.08768000  |
| H | -2.98249200 | 0.02499500  | 1.31335500  |
| N | -1.33568400 | -1.80607900 | -0.72679200 |
| H | 0.33969100  | -0.71689900 | 1.56192000  |
| H | -2.17487500 | -2.38069900 | -0.77885400 |

#### H<sub>2</sub>O-6d

|   |             |            |             |
|---|-------------|------------|-------------|
| C | 1.14178900  | 2.03969300 | 0.51825500  |
| C | 1.82007400  | 1.30077600 | -0.62963800 |
| C | 0.95792600  | 0.03925000 | -0.77107100 |
| C | -0.33942200 | 1.81487100 | 0.25132600  |
| H | 1.42529100  | 1.58941400 | 1.47959400  |

|   |             |             |             |
|---|-------------|-------------|-------------|
| H | 1.40071600  | 3.10091200  | 0.55934800  |
| H | 2.87293700  | 1.06385200  | -0.45420100 |
| H | 1.74756100  | 1.88086200  | -1.55694800 |
| H | 1.00433000  | -0.35802800 | -1.79180200 |
| H | -0.76455400 | 2.57421900  | -0.42108700 |
| H | -0.94461400 | 1.80712000  | 1.16310200  |
| N | -0.37258500 | 0.50718100  | -0.42133500 |
| C | 1.49362300  | -1.06727100 | 0.13697400  |
| O | 2.54349500  | -1.62028000 | -0.12538600 |
| O | 0.80931000  | -1.39859700 | 1.22253000  |
| C | -1.54682900 | -0.06074600 | -0.82518500 |
| C | -1.44663400 | -1.24420300 | -1.74303000 |
| H | -2.44289000 | -1.63217100 | -1.96461500 |
| H | -0.96166200 | -0.97454900 | -2.68784800 |
| H | -0.86240800 | -2.05512600 | -1.29154500 |
| N | -2.65596200 | 0.42943700  | -0.36710100 |
| H | -0.04572700 | -0.91705300 | 1.36632700  |
| H | -3.44214000 | -0.08456600 | -0.76020600 |
| O | -1.64822100 | -0.62957200 | 2.12674500  |
| H | -2.21343700 | -0.13795200 | 1.49532600  |
| H | -1.69341700 | -0.15989800 | 2.96670800  |

#### H<sub>2</sub>O-6b

|   |             |             |             |
|---|-------------|-------------|-------------|
| C | 0.29869500  | 2.58869500  | -0.33305000 |
| C | 1.44868000  | 1.62898400  | -0.06489900 |
| C | 0.96470700  | 0.29325700  | -0.63738000 |
| C | -0.92687200 | 1.73730500  | -0.04568300 |
| H | 0.32992500  | 3.48547100  | 0.29116800  |
| H | 0.29883600  | 2.90261600  | -1.38421200 |
| H | 1.60105000  | 1.52084900  | 1.01874400  |
| H | 2.39717500  | 1.93430600  | -0.51400900 |
| H | 1.19973500  | 0.22003900  | -1.70815000 |
| H | -1.80805000 | 2.05050600  | -0.61687700 |
| H | -1.17636900 | 1.70539700  | 1.02398800  |
| N | -0.50245800 | 0.39201600  | -0.47656000 |
| C | 1.64183500  | -0.87178400 | 0.11332800  |
| O | 2.72964000  | -1.24072800 | -0.37399900 |
| O | 1.08419300  | -1.29755000 | 1.15923100  |
| H | -0.29420100 | -0.61811000 | 2.01067000  |
| C | -1.34701700 | -0.58430700 | -0.72722300 |
| O | -1.08162000 | -0.25352400 | 2.47846700  |
| H | -1.02637400 | -0.58915600 | 3.37831000  |
| C | -0.87646500 | -1.88024700 | -1.28123700 |
| H | -0.14010700 | -1.72466700 | -2.07463800 |
| H | -0.39607100 | -2.45388400 | -0.48105100 |
| H | -1.71084100 | -2.45877000 | -1.68098600 |
| N | -2.64734400 | -0.43249500 | -0.49822700 |
| H | -3.28406100 | -1.19172200 | -0.69229900 |
| H | -3.02111500 | 0.36348200  | 0.00011800  |

#### H<sub>2</sub>O-7

|   |             |             |             |
|---|-------------|-------------|-------------|
| N | -0.28629300 | 0.73119200  | -0.14922900 |
| H | 0.21766000  | -0.77216200 | -0.23477000 |

|   |             |             |             |
|---|-------------|-------------|-------------|
| H | -0.46031100 | 0.89466000  | 0.84406300  |
| C | -2.68058600 | 0.35875200  | -0.33077400 |
| C | -2.85758600 | -0.99119000 | -0.64928200 |
| C | -3.58709500 | 0.97597500  | 0.53263300  |
| C | -3.92140000 | -1.71041200 | -0.11448400 |
| H | -2.15214200 | -1.47557100 | -1.32458800 |
| C | -4.65504000 | 0.25868800  | 1.06992400  |
| H | -3.45490100 | 2.02831000  | 0.78249600  |
| C | -4.82328500 | -1.08571100 | 0.74772800  |
| H | -4.05120100 | -2.75908400 | -0.37177100 |
| H | -5.35638500 | 0.75147100  | 1.73920300  |
| H | -5.65642200 | -1.64643000 | 1.16480400  |
| C | -1.50476900 | 1.11376500  | -0.88216900 |
| H | -1.69680800 | 2.19707400  | -0.82512200 |
| H | -1.36084100 | 0.85793200  | -1.93940500 |
| C | 3.14104600  | -0.37249100 | 1.96344800  |
| C | 3.85895200  | -0.65410300 | 0.64758100  |
| C | 2.73687600  | -0.44737900 | -0.37166100 |
| C | 2.19694700  | 0.78328200  | 1.62395500  |
| H | 2.56085900  | -1.25651100 | 2.26275000  |
| H | 3.81895500  | -0.13118100 | 2.78713700  |
| H | 4.30033300  | -1.65193100 | 0.58827600  |
| H | 4.64334300  | 0.08953900  | 0.46437600  |
| H | 3.14144800  | -0.23924500 | -1.37250500 |
| H | 2.61425600  | 1.75229800  | 1.93623100  |
| H | 1.23227700  | 0.66382400  | 2.14450500  |
| N | 2.07450800  | 0.72679900  | 0.16449600  |
| C | 1.92835200  | -1.74968400 | -0.51793700 |
| O | 2.50041000  | -2.79339300 | -0.79188100 |
| O | 0.61931200  | -1.71850100 | -0.36088900 |
| C | 1.00793200  | 1.42509600  | -0.51518100 |
| C | 0.97764300  | 2.88441100  | -0.08239400 |
| H | 1.94036700  | 3.35573400  | -0.30357200 |
| H | 0.19114200  | 3.43086000  | -0.61408700 |
| H | 0.78030400  | 2.97653900  | 0.99027800  |
| N | 1.23844200  | 1.36892400  | -1.93867400 |
| H | 1.02788800  | 0.45516800  | -2.33310900 |
| H | 0.66787400  | 2.05147200  | -2.42750500 |

## H<sub>2</sub>O-8

|   |            |             |             |
|---|------------|-------------|-------------|
| C | 3.63087300 | -0.03943500 | -1.70846500 |
| C | 2.87505800 | -1.33418500 | -1.39598000 |
| C | 1.68318400 | -0.91869800 | -0.51731100 |
| C | 3.22225600 | 0.87337800  | -0.56867300 |
| H | 4.71350700 | -0.18822600 | -1.76915800 |
| H | 3.29333700 | 0.38993200  | -2.65945100 |
| H | 3.50811400 | -2.02417200 | -0.82947700 |
| H | 2.54020900 | -1.85583600 | -2.29723600 |
| H | 0.72642900 | -1.16400500 | -1.00323000 |
| H | 3.34991400 | 1.93514000  | -0.80437200 |
| H | 3.80452000 | 0.65796000  | 0.34691800  |
| N | 1.80867800 | 0.54611200  | -0.40806000 |
| C | 1.67748800 | -1.66559900 | 0.82716500  |

|   |             |             |             |
|---|-------------|-------------|-------------|
| O | 2.60741100  | -2.31228900 | 1.26648600  |
| O | 0.53902500  | -1.57003100 | 1.51512200  |
| C | 1.03341800  | 1.33449800  | 0.54081500  |
| C | 1.05581800  | 2.80448400  | 0.12367700  |
| H | 0.26873500  | 3.35137400  | 0.65697900  |
| H | 2.01438200  | 3.26651800  | 0.37763200  |
| H | 0.89286600  | 2.91323700  | -0.95219000 |
| N | 1.56412100  | 1.27042200  | 1.89821700  |
| H | 1.29481700  | 0.42138800  | 2.38778100  |
| H | 1.25522100  | 2.06278200  | 2.45413700  |
| N | -0.34470100 | 0.77428700  | 0.52659200  |
| H | -0.03103600 | -0.84266000 | 1.11096100  |
| H | -0.85441600 | 1.22268400  | 1.28903300  |
| C | -2.48329000 | 0.32085300  | -0.52595300 |
| C | -2.65857400 | -1.06241400 | -0.63060900 |
| C | -3.58018500 | 1.11665200  | -0.19057300 |
| C | -3.90418500 | -1.63847400 | -0.40010000 |
| H | -1.81103600 | -1.69222000 | -0.90172500 |
| C | -4.82990000 | 0.54424800  | 0.04022600  |
| H | -3.45162300 | 2.19593600  | -0.11180900 |
| C | -4.99318900 | -0.83515900 | -0.06237900 |
| H | -4.02743500 | -2.71544100 | -0.48727700 |
| H | -5.67636500 | 1.17610000  | 0.29892100  |
| H | -5.96738300 | -1.28460400 | 0.11527100  |
| C | -1.12701100 | 0.94010400  | -0.71181000 |
| H | -1.24028800 | 2.00121500  | -0.98182700 |
| H | -0.58121900 | 0.45420900  | -1.53017300 |

## H<sub>2</sub>O-11

|   |             |             |             |
|---|-------------|-------------|-------------|
| C | -1.04865300 | 1.26048300  | -0.63187600 |
| N | -1.16650500 | 2.09587900  | 0.52476800  |
| H | -1.89526600 | 2.78894900  | 0.38090600  |
| N | 0.49829100  | 0.84071600  | -0.67572800 |
| H | 0.70671400  | 0.43137200  | -1.59113200 |
| H | 1.05281500  | 1.71374700  | -0.58930700 |
| C | 2.36324500  | -0.49792500 | 0.20728700  |
| C | 2.70018500  | -1.51026500 | -0.69601700 |
| C | 3.37712400  | 0.15747000  | 0.90939700  |
| C | 4.03215400  | -1.85606900 | -0.90204100 |
| H | 1.91041300  | -2.03557200 | -1.23354200 |
| C | 4.71031300  | -0.19035900 | 0.70746400  |
| H | 3.11908100  | 0.93811200  | 1.62382100  |
| C | 5.03902700  | -1.19514400 | -0.19992300 |
| H | 4.28416300  | -2.64703000 | -1.60395300 |
| H | 5.49314500  | 0.32219100  | 1.26098400  |
| H | 6.07985900  | -1.46771200 | -0.35644500 |
| C | 0.92782300  | -0.10908900 | 0.39588700  |
| H | 0.75988900  | 0.39420800  | 1.35358000  |
| H | 0.25118600  | -0.96929500 | 0.33929200  |
| O | 1.36326400  | 3.37312300  | 0.25459100  |
| H | 1.97932800  | 3.53344800  | 0.97750700  |
| H | 0.48901200  | 3.19117700  | 0.65930300  |
| C | -1.24534900 | 2.08531000  | -1.89429500 |

|   |             |             |             |
|---|-------------|-------------|-------------|
| H | -0.64403100 | 2.99982800  | -1.85717900 |
| H | -0.98137800 | 1.53363400  | -2.80094000 |
| H | -2.30344100 | 2.36237600  | -1.96376600 |
| N | -1.78912800 | 0.05171200  | -0.57410000 |
| C | -2.85369700 | -1.89219900 | -1.30470800 |
| C | -3.80091500 | -1.15210900 | -0.36851100 |
| C | -2.89333200 | -0.18918900 | 0.38855800  |
| C | -1.94311200 | -0.77196000 | -1.77337900 |
| H | -2.27656700 | -2.63718800 | -0.74306300 |
| H | -3.35880600 | -2.39419100 | -2.13566500 |
| H | -4.34452100 | -1.81119100 | 0.31274300  |
| H | -4.52985700 | -0.58007400 | -0.95889800 |
| H | -3.41811100 | 0.75243600  | 0.60939200  |
| H | -2.42112300 | -0.21626200 | -2.59870300 |
| H | -0.97152900 | -1.14103700 | -2.13755800 |
| C | -2.32468200 | -0.74457500 | 1.72174500  |
| O | -2.44817700 | -1.96556500 | 1.96265300  |
| O | -1.74433700 | 0.10657400  | 2.45809500  |
| H | -1.38636800 | 1.54057200  | 1.36780800  |

## H<sub>2</sub>O-12

|   |             |             |             |
|---|-------------|-------------|-------------|
| C | -0.77774400 | 0.92837800  | -0.78010900 |
| N | -0.99534300 | 1.98145500  | 0.23083500  |
| H | -1.71570000 | 2.62607500  | -0.09070500 |
| N | 0.63184700  | 0.54289300  | -0.70862900 |
| H | 0.86710100  | -0.03395000 | -1.51491700 |
| H | 1.62557500  | 2.16991100  | -0.76043400 |
| C | 2.51398200  | -0.48262500 | 0.44221500  |
| C | 2.92254300  | -1.61314700 | -0.27159300 |
| C | 3.48444000  | 0.32177800  | 1.04359100  |
| C | 4.27406600  | -1.92573800 | -0.39344100 |
| H | 2.17277400  | -2.25971500 | -0.72907300 |
| C | 4.83759200  | 0.01032200  | 0.92835800  |
| H | 3.17370000  | 1.19301100  | 1.62009100  |
| C | 5.23496900  | -1.11255500 | 0.20564700  |
| H | 4.57733100  | -2.80907700 | -0.95069500 |
| H | 5.58156300  | 0.64354000  | 1.40608500  |
| H | 6.29041100  | -1.35830000 | 0.11555600  |
| C | 1.05690100  | -0.12856400 | 0.53060800  |
| H | 0.89549700  | 0.56384500  | 1.36695900  |
| H | 0.45014300  | -1.02495600 | 0.73397700  |
| O | 1.82681200  | 3.11694400  | -0.58787900 |
| H | 2.73595400  | 3.14263800  | -0.27158700 |
| H | -0.14585500 | 2.54321300  | 0.31126700  |
| C | -1.04418100 | 1.46739700  | -2.18415000 |
| H | -0.44879900 | 2.37009900  | -2.35964100 |
| H | -0.79068000 | 0.73740100  | -2.96024700 |
| H | -2.10575700 | 1.72226300  | -2.29562400 |
| N | -1.63777000 | -0.20058300 | -0.41659300 |
| C | -2.86630400 | -2.13618000 | -0.91879600 |
| C | -3.85491800 | -0.99094200 | -0.74342800 |
| C | -3.02895100 | 0.05423900  | -0.00462600 |
| C | -1.59055400 | -1.39012000 | -1.27078500 |

|   |             |             |             |
|---|-------------|-------------|-------------|
| H | -2.74179800 | -2.67912900 | 0.02803100  |
| H | -3.15937200 | -2.85494500 | -1.68941200 |
| H | -4.76542400 | -1.26006400 | -0.20257400 |
| H | -4.13823200 | -0.58940700 | -1.72553400 |
| H | -3.36497700 | 1.07005200  | -0.26961100 |
| H | -1.59524900 | -1.13327700 | -2.34516400 |
| H | -0.68512700 | -1.98047000 | -1.07355700 |
| C | -3.13594100 | -0.06437500 | 1.52092000  |
| O | -3.95102200 | -0.76897700 | 2.08774200  |
| O | -2.27263500 | 0.66564100  | 2.21308600  |
| H | -1.68484800 | 1.19881200  | 1.58745600  |

## H<sub>2</sub>O-18

|   |             |             |             |
|---|-------------|-------------|-------------|
| N | -0.31767200 | -0.89084000 | 0.34789800  |
| H | -0.78653400 | -1.38268700 | 1.10750300  |
| H | -0.15309500 | 0.82500100  | 0.47532300  |
| C | -2.55172300 | -0.31220200 | -0.45941800 |
| C | -3.48150900 | -1.11417200 | 0.21015300  |
| C | -2.89475700 | 1.00691100  | -0.76334800 |
| C | -4.72302900 | -0.60514800 | 0.58107800  |
| H | -3.23091800 | -2.15136100 | 0.43554300  |
| C | -4.13838900 | 1.51850600  | -0.39846000 |
| H | -2.17729400 | 1.63768600  | -1.28595400 |
| C | -5.05376800 | 0.71479600  | 0.27727200  |
| H | -5.43599000 | -1.24090800 | 1.10086400  |
| H | -4.39271300 | 2.54711400  | -0.64388100 |
| H | -6.02441000 | 1.11336100  | 0.56285500  |
| C | -1.20643400 | -0.87546200 | -0.82754500 |
| H | -0.73392200 | -0.25818300 | -1.60377800 |
| H | -1.33989000 | -1.88544700 | -1.24581100 |
| C | 4.07577600  | 0.45358400  | -0.71783100 |
| C | 3.68003300  | 0.90247300  | 0.68116000  |
| C | 2.17219100  | 0.69294100  | 0.68553700  |
| C | 3.20391700  | -0.77368700 | -0.90026700 |
| H | 3.81438400  | 1.22534600  | -1.45457900 |
| H | 5.14155700  | 0.22863100  | -0.82183700 |
| H | 3.95500800  | 1.93273900  | 0.92097600  |
| H | 4.13566200  | 0.23826700  | 1.42758200  |
| H | 1.81683800  | 0.41200400  | 1.68810600  |
| H | 3.65419300  | -1.63453700 | -0.37552100 |
| H | 3.07572400  | -1.05966500 | -1.94916000 |
| N | 1.91356800  | -0.38570500 | -0.29948300 |
| C | 1.38919400  | 1.94594700  | 0.30232500  |
| O | 1.89446900  | 3.02186400  | 0.04337800  |
| O | 0.07172100  | 1.79111900  | 0.29239900  |
| C | 1.04186700  | -1.48138800 | 0.14456600  |
| C | 1.46046100  | -2.11382600 | 1.47211700  |
| H | 1.27384100  | -1.45068100 | 2.32271900  |
| H | 0.89766700  | -3.03861700 | 1.64521700  |
| H | 2.52560200  | -2.36608200 | 1.44961400  |
| N | 1.12301400  | -2.51068300 | -0.86767000 |
| H | 0.50620700  | -3.28634300 | -0.64464500 |
| H | 0.87320600  | -2.15454900 | -1.78660300 |

**H<sub>2</sub>O-19**

|   |             |             |             |
|---|-------------|-------------|-------------|
| N | -0.65347000 | -0.18561100 | 0.25963100  |
| H | 1.69741000  | 1.37220100  | -1.14078900 |
| H | -0.75556100 | -0.89345000 | -0.46499200 |
| C | -3.06937500 | -0.02917100 | 0.43029000  |
| C | -3.41398700 | 1.26760700  | 0.03698900  |
| C | -3.91495100 | -1.08491300 | 0.08823500  |
| C | -4.58198500 | 1.50440800  | -0.68058300 |
| H | -2.75354100 | 2.09400100  | 0.29984800  |
| C | -5.08521300 | -0.85360400 | -0.63485300 |
| H | -3.65339400 | -2.09806800 | 0.39281000  |
| C | -5.42087300 | 0.44160300  | -1.01970400 |
| H | -4.84158300 | 2.51873500  | -0.97542000 |
| H | -5.73450100 | -1.68646200 | -0.89520500 |
| H | -6.33422900 | 0.62561800  | -1.58070000 |
| C | -1.78922500 | -0.28394700 | 1.17625400  |
| H | -1.85607800 | -1.26350200 | 1.68107000  |
| H | -1.65924700 | 0.47633500  | 1.95967300  |
| C | 2.98989200  | -2.14788500 | -1.03687900 |
| C | 3.84068800  | -0.89162000 | -0.93527200 |
| C | 3.01918700  | -0.02032200 | 0.02623500  |
| C | 1.58269600  | -1.57194600 | -1.10543500 |
| H | 3.23805100  | -2.77292800 | -1.90012900 |
| H | 3.10776200  | -2.75674900 | -0.12969600 |
| H | 3.91355800  | -0.40493000 | -1.91905900 |
| H | 4.85572200  | -1.05581600 | -0.56313800 |
| H | 3.29995700  | -0.23464700 | 1.06760900  |
| H | 0.82680700  | -2.27959400 | -0.74639000 |
| H | 1.31778300  | -1.31069100 | -2.14001000 |
| N | 1.62287300  | -0.34499500 | -0.27486900 |
| C | 3.30472300  | 1.44398700  | -0.22962800 |
| O | 4.29461100  | 2.01815600  | 0.17761100  |
| O | 2.41604200  | 2.04389800  | -1.02053800 |
| C | 0.68297000  | -0.25892600 | 0.86783200  |
| C | 0.86520500  | -1.42385100 | 1.84315600  |
| H | 1.89389800  | -1.45736200 | 2.21910800  |
| H | 0.20237500  | -1.32153800 | 2.70937000  |
| H | 0.63764100  | -2.38221000 | 1.36492100  |
| N | 0.98183500  | 0.97355400  | 1.56904800  |
| H | 0.49839500  | 1.75210200  | 1.12655200  |
| H | 0.69637600  | 0.93337200  | 2.54148800  |

**H<sub>2</sub>O-20**

|   |             |             |             |
|---|-------------|-------------|-------------|
| N | -0.65091500 | -0.25090500 | 0.21789400  |
| H | 1.65007800  | 1.41965000  | -1.05849700 |
| H | -0.68643500 | -0.81268300 | -0.62842900 |
| C | -3.07697300 | -0.14908100 | 0.37422100  |
| C | -3.37150300 | 1.20666200  | 0.19520900  |
| C | -3.97641800 | -1.10149700 | -0.10513400 |
| C | -4.54111000 | 1.60065700  | -0.44563000 |
| H | -2.66973300 | 1.95321800  | 0.56718800  |
| C | -5.15053400 | -0.71196700 | -0.75097900 |

|   |             |             |             |
|---|-------------|-------------|-------------|
| H | -3.75515700 | -2.15990600 | 0.03076200  |
| C | -5.43500400 | 0.63983300  | -0.92213000 |
| H | -4.76035200 | 2.65853900  | -0.57294700 |
| H | -5.84179600 | -1.46625300 | -1.12032700 |
| H | -6.34985300 | 0.94670000  | -1.42386400 |
| C | -1.80420300 | -0.56153300 | 1.06032400  |
| H | -1.86734600 | -1.63086000 | 1.32775100  |
| H | -1.68390900 | 0.00133400  | 1.99546900  |
| C | 3.06911700  | -2.05214500 | -1.06910800 |
| C | 3.90096100  | -0.79475700 | -0.87619200 |
| C | 3.01615600  | 0.04564400  | 0.06151000  |
| C | 1.66677700  | -1.47834200 | -1.19569600 |
| H | 3.37066500  | -2.64102100 | -1.94079000 |
| H | 3.13782700  | -2.69480200 | -0.18047200 |
| H | 4.02751600  | -0.27727900 | -1.83830500 |
| H | 4.89391200  | -0.96038100 | -0.44977600 |
| H | 3.28001000  | -0.17359600 | 1.10760000  |
| H | 0.88763300  | -2.20528100 | -0.94373700 |
| H | 1.47645500  | -1.14210700 | -2.22517400 |
| N | 1.63676300  | -0.31103800 | -0.27919000 |
| C | 3.27529700  | 1.52028100  | -0.18479300 |
| O | 4.26488600  | 2.10287000  | 0.20895300  |
| O | 2.34887500  | 2.11506700  | -0.93284100 |
| C | 0.66254400  | -0.35682900 | 0.85281600  |
| C | 0.86352500  | -1.61035900 | 1.70902600  |
| H | 1.87973400  | -1.64422900 | 2.12029100  |
| H | 0.16794400  | -1.61363700 | 2.55360200  |
| H | 0.69906200  | -2.52527200 | 1.13030100  |
| N | 0.77734700  | 0.78920500  | 1.72020800  |
| H | 1.61095000  | 0.79160300  | 2.29761600  |
| H | 0.68854400  | 1.66253800  | 1.20977900  |

#### H<sub>2</sub>O-21

|   |             |             |             |
|---|-------------|-------------|-------------|
| N | -0.48608800 | -0.35372700 | 0.06259000  |
| H | 3.53586500  | -0.38326300 | 1.08811500  |
| H | -0.26972800 | -0.04505400 | -0.88218400 |
| C | -2.92193100 | -0.54793900 | -0.13937100 |
| C | -3.23801500 | 0.53029100  | 0.69422100  |
| C | -3.85228100 | -0.95020000 | -1.09816200 |
| C | -4.45805100 | 1.18724700  | 0.57392300  |
| H | -2.50906900 | 0.85191700  | 1.43801700  |
| C | -5.07790400 | -0.29492900 | -1.22226000 |
| H | -3.61345200 | -1.78598500 | -1.75542300 |
| C | -5.38366500 | 0.77565900  | -0.38690200 |
| H | -4.69108900 | 2.02316800  | 1.23007400  |
| H | -5.79114900 | -0.62031000 | -1.97645400 |
| H | -6.33710600 | 1.29003800  | -0.48361000 |
| C | -1.61577900 | -1.27842100 | 0.02983300  |
| H | -1.52303100 | -2.04637100 | -0.75785600 |
| H | -1.62203300 | -1.81012900 | 0.99042100  |
| C | 1.53191600  | 2.52089000  | -0.10931000 |
| C | 2.71170400  | 1.90722100  | -0.84417300 |
| C | 2.43545200  | 0.39994300  | -0.70971700 |



|   |            |             |             |
|---|------------|-------------|-------------|
| C | 1.37442000 | 1.59170800  | 1.08419000  |
| H | 1.70081600 | 3.56283600  | 0.17961700  |
| H | 0.63227100 | 2.48303800  | -0.73882000 |
| H | 3.64958200 | 2.16316100  | -0.32997900 |
| H | 2.80853300 | 2.20762700  | -1.89107400 |
| H | 1.83156800 | 0.05757200  | -1.56455900 |
| H | 0.34712000 | 1.57970400  | 1.46175700  |
| H | 2.03873700 | 1.89144200  | 1.90703700  |
| N | 1.76891300 | 0.24713200  | 0.58976100  |
| C | 3.75745400 | -0.34303100 | -0.74867100 |
| O | 4.35641900 | -0.59327900 | -1.77399400 |
| O | 4.25191900 | -0.63584100 | 0.45230800  |
| C | 0.73716300 | -0.81377800 | 0.72297600  |
| C | 1.27883800 | -2.12638000 | 0.16100200  |
| H | 2.19519000 | -2.43396200 | 0.67837700  |
| H | 0.53220800 | -2.91184300 | 0.30899700  |
| H | 1.48576200 | -2.06109700 | -0.91303100 |
| N | 0.40215400 | -1.04009800 | 2.11450500  |
| H | 1.23328800 | -1.30870900 | 2.63461100  |
| H | 0.02823700 | -0.19364800 | 2.53598900  |

## H<sub>2</sub>O-22

|   |             |             |             |
|---|-------------|-------------|-------------|
| N | -0.46918600 | -0.40471700 | 0.11831800  |
| H | 3.53793800  | -0.47793500 | 0.95639700  |
| H | -0.29451300 | -0.04622000 | -0.81873600 |
| C | -2.89786100 | -0.54274300 | -0.12426000 |
| C | -3.19924700 | 0.55720700  | 0.68608500  |
| C | -3.81812700 | -0.93320000 | -1.09729500 |
| C | -4.39714000 | 1.24636000  | 0.52958500  |
| H | -2.47756900 | 0.87020200  | 1.44042600  |
| C | -5.02098800 | -0.24465700 | -1.25795600 |
| H | -3.58935200 | -1.78535400 | -1.73672500 |
| C | -5.31349000 | 0.84656300  | -0.44486100 |
| H | -4.62006700 | 2.09839100  | 1.16823400  |
| H | -5.72696700 | -0.56082100 | -2.02274800 |
| H | -6.24962300 | 1.38607500  | -0.56922400 |
| C | -1.61460200 | -1.30510800 | 0.08094000  |
| H | -1.53119800 | -2.09190100 | -0.68961300 |
| H | -1.66567400 | -1.82260600 | 1.04980800  |
| C | 1.43242600  | 2.48857800  | 0.16855600  |
| C | 2.57274500  | 1.99645600  | -0.70796800 |
| C | 2.36611500  | 0.47091600  | -0.69444300 |
| C | 1.40706600  | 1.44872300  | 1.27648900  |
| H | 1.58417600  | 3.50702500  | 0.53948700  |
| H | 0.48673400  | 2.46354200  | -0.39037100 |
| H | 3.53792900  | 2.24764000  | -0.24444800 |
| H | 2.57569000  | 2.39275400  | -1.72691800 |
| H | 1.73149000  | 0.17641800  | -1.54435600 |
| H | 0.42161200  | 1.36763100  | 1.74423900  |
| H | 2.13976000  | 1.68858500  | 2.06006500  |
| N | 1.78540500  | 0.17263600  | 0.61858300  |
| C | 3.71314000  | -0.21004200 | -0.86212100 |
| O | 4.28711100  | -0.30927000 | -1.92717600 |

|   |             |             |             |
|---|-------------|-------------|-------------|
| O | 4.24986900  | -0.63030700 | 0.28015200  |
| C | 0.78322000  | -0.90818700 | 0.70724700  |
| C | 1.30890400  | -2.16468800 | 0.01890100  |
| H | 2.24403500  | -2.50449300 | 0.47705700  |
| H | 0.57418600  | -2.97147000 | 0.11502100  |
| H | 1.47214900  | -2.00433300 | -1.05213300 |
| N | 0.60287300  | -1.21828500 | 2.11455600  |
| H | -0.06213600 | -0.58004700 | 2.54515900  |
| H | 0.24895400  | -2.16098100 | 2.24199200  |

## H<sub>2</sub>O-23

|   |             |             |             |
|---|-------------|-------------|-------------|
| N | -0.71464400 | -0.22131500 | -0.17525500 |
| H | 2.48751100  | -1.04090600 | 1.41397800  |
| H | -0.77655300 | 0.25673900  | -1.07267300 |
| C | -3.13079600 | -0.48524900 | -0.01683400 |
| C | -3.45367000 | 0.37762700  | 1.03578300  |
| C | -4.06256600 | -0.68259500 | -1.03578500 |
| C | -4.68426600 | 1.02463500  | 1.07003900  |
| H | -2.72679900 | 0.53660000  | 1.83210000  |
| C | -5.29827500 | -0.03507200 | -1.00655300 |
| H | -3.81824800 | -1.35139100 | -1.86052000 |
| C | -5.61145000 | 0.81916000  | 0.04657800  |
| H | -4.92521100 | 1.68805800  | 1.89771200  |
| H | -6.01521900 | -0.19928300 | -1.80782400 |
| H | -6.57432900 | 1.32407800  | 0.07350900  |
| C | -1.80000800 | -1.18745900 | -0.04343100 |
| H | -1.81308000 | -1.94513600 | -0.84637200 |
| H | -1.66129800 | -1.72916200 | 0.90333500  |
| C | 2.23156700  | 2.61050000  | -0.27374200 |
| C | 3.38708700  | 1.76193800  | -0.81799800 |
| C | 2.89202500  | 0.28847500  | -0.73555600 |
| C | 1.41755400  | 1.61539200  | 0.53424600  |
| H | 2.58054000  | 3.46022100  | 0.32128700  |
| H | 1.61643100  | 2.99875500  | -1.09373600 |
| H | 4.28900400  | 1.88859300  | -0.20977000 |
| H | 3.65632500  | 2.02844800  | -1.84376400 |
| H | 2.94092700  | -0.18896400 | -1.72356700 |
| H | 0.37249600  | 1.90427300  | 0.67515800  |
| H | 1.87086700  | 1.46903700  | 1.53492800  |
| N | 1.51075000  | 0.41849100  | -0.29850500 |
| C | 3.88695000  | -0.50003600 | 0.12643400  |
| O | 5.04213000  | -0.61265700 | -0.25118400 |
| O | 3.49922500  | -1.03023400 | 1.27210500  |
| C | 0.65484900  | -0.71719000 | -0.02047400 |
| C | 0.98672200  | -1.87240700 | -0.95847300 |
| H | 1.99909100  | -2.26071900 | -0.80419800 |
| H | 0.29294800  | -2.70270000 | -0.79288000 |
| H | 0.88791200  | -1.54518800 | -1.99911000 |
| N | 0.86210800  | -1.17865900 | 1.36966100  |
| H | 0.37124600  | -0.56210500 | 2.01604200  |

H 0.51276400 -2.12205800 1.52227800

**H<sub>2</sub>O-24**

|   |             |             |             |
|---|-------------|-------------|-------------|
| N | -0.55313500 | -0.26918100 | 0.59037000  |
| H | 0.85003400  | 2.52163000  | -0.95988000 |
| H | -0.81145600 | -1.00320500 | -0.05905900 |
| C | -2.93820900 | 0.16871800  | 0.44461900  |
| C | -3.13991600 | 0.50158300  | -0.89873700 |
| C | -3.93587600 | -0.52052100 | 1.13416200  |
| C | -4.32025800 | 0.14530300  | -1.54300900 |
| H | -2.36249800 | 1.04533400  | -1.43526300 |
| C | -5.12185100 | -0.87265700 | 0.49245700  |
| H | -3.78240900 | -0.78124600 | 2.18021600  |
| C | -5.31421600 | -0.54217000 | -0.84666900 |
| H | -4.46886400 | 0.40908200  | -2.58732200 |
| H | -5.89501500 | -1.40731200 | 1.03883700  |
| H | -6.23858100 | -0.81753500 | -1.34871000 |
| C | -1.65345200 | 0.54712400  | 1.12244600  |
| H | -1.73530700 | 0.39813200  | 2.20671300  |
| H | -1.41644000 | 1.60191500  | 0.92275300  |
| C | 2.68671700  | -2.74123400 | -0.53772800 |
| C | 3.69783100  | -1.60476700 | -0.58968700 |
| C | 3.10692800  | -0.51752000 | 0.31921100  |
| C | 1.35980800  | -2.00361800 | -0.51741300 |
| H | 2.76342200  | -3.42882900 | -1.38403500 |
| H | 2.80126400  | -3.31982900 | 0.38716600  |
| H | 3.77013800  | -1.21929500 | -1.61651600 |
| H | 4.70187000  | -1.89224800 | -0.26772400 |
| H | 3.49458700  | -0.61075900 | 1.34209000  |
| H | 0.54976400  | -2.58944800 | -0.06885500 |
| H | 1.05607300  | -1.68141900 | -1.52540700 |
| N | 1.66112300  | -0.82722400 | 0.30994100  |
| C | 3.45799700  | 0.87690500  | -0.24722200 |
| O | 4.59629200  | 1.28737900  | 0.07583600  |
| O | 2.61991700  | 1.42368200  | -1.00343200 |
| C | 0.73542500  | -0.05243800 | 0.84465200  |
| C | 1.08707100  | 1.05044400  | 1.77549700  |
| H | 2.15064100  | 1.06983300  | 2.00920400  |
| H | 0.79322000  | 2.00554900  | 1.32395100  |
| H | 0.52788700  | 0.92999500  | 2.70911300  |
| N | -0.02015900 | 3.01900300  | -0.75463500 |
| H | -0.57104200 | 3.02482700  | -1.60869200 |
| H | 0.23023900  | 3.98724300  | -0.57300900 |

**H<sub>2</sub>O-25**

|   |            |             |             |
|---|------------|-------------|-------------|
| C | 3.92314700 | -0.36936800 | -0.98794500 |
| C | 2.79217700 | -1.26283100 | -1.48229900 |
| C | 1.63264600 | -0.88508100 | -0.57277200 |
| C | 3.21712200 | 0.93615400  | -0.63126900 |
| H | 4.37595200 | -0.81091400 | -0.09195200 |
| H | 4.71577000 | -0.22785000 | -1.72880700 |
| H | 3.02594900 | -2.32977200 | -1.43949400 |
| H | 2.52071800 | -1.00800000 | -2.51416000 |
| H | 0.66879000 | -1.09742100 | -1.06248000 |

|   |             |             |             |
|---|-------------|-------------|-------------|
| H | 3.29934900  | 1.67665900  | -1.44161900 |
| H | 3.65837200  | 1.38914500  | 0.27047700  |
| N | 1.81235900  | 0.56275300  | -0.42550200 |
| C | 1.62581400  | -1.69149100 | 0.73451700  |
| O | 2.48885200  | -2.48124000 | 1.06359100  |
| O | 0.56353300  | -1.48884600 | 1.51351100  |
| C | 1.01338100  | 1.40536900  | 0.45749900  |
| C | 1.04716600  | 2.84115500  | -0.06107500 |
| H | 0.33578500  | 3.45400500  | 0.50342700  |
| H | 2.04307600  | 3.27977900  | 0.06383800  |
| H | 0.79645300  | 2.88203200  | -1.12521300 |
| N | 1.41901800  | 1.45360400  | 1.86406100  |
| H | 2.27636700  | 1.98559300  | 1.97654700  |
| H | 1.57672300  | 0.52476700  | 2.24672600  |
| N | -0.35027500 | 0.83857400  | 0.49032800  |
| H | 0.00722800  | -0.73618200 | 1.13566400  |
| H | -0.83436700 | 1.31117800  | 1.25423800  |
| C | -2.49919400 | 0.31717600  | -0.51086300 |
| C | -2.64972100 | -1.07069900 | -0.58850300 |
| C | -3.60649000 | 1.09788800  | -0.17433100 |
| C | -3.88137700 | -1.66551000 | -0.33216400 |
| H | -1.79534400 | -1.69107300 | -0.85927700 |
| C | -4.84220000 | 0.50668500  | 0.08296300  |
| H | -3.49724700 | 2.18052900  | -0.11597500 |
| C | -4.98096100 | -0.87695000 | 0.00568900  |
| H | -3.98545900 | -2.74589300 | -0.39952800 |
| H | -5.69680400 | 1.12732800  | 0.34198000  |
| H | -5.94437000 | -1.34114900 | 0.20308400  |
| C | -1.15978100 | 0.96134000  | -0.73305800 |
| H | -1.30226500 | 2.01495200  | -1.01782600 |
| H | -0.62185900 | 0.47542600  | -1.55701500 |

## H<sub>2</sub>O-26

|   |             |             |             |
|---|-------------|-------------|-------------|
| C | -3.54642700 | 0.51584800  | -1.45824600 |
| C | -2.25052700 | 1.25296500  | -1.77176300 |
| C | -1.35701000 | 0.84973500  | -0.59420900 |
| C | -3.06322400 | -0.82914500 | -0.92114100 |
| H | -4.09836300 | 1.05531700  | -0.67575400 |
| H | -4.21143400 | 0.41192600  | -2.32046600 |
| H | -2.36154600 | 2.33661600  | -1.85989200 |
| H | -1.80479200 | 0.87166000  | -2.69881500 |
| H | -0.29743200 | 0.96509700  | -0.86372400 |
| H | -3.03898000 | -1.59565100 | -1.71146500 |
| H | -3.73300500 | -1.20104000 | -0.12956100 |
| N | -1.70949000 | -0.55135100 | -0.42866500 |
| C | -1.56094500 | 1.83097300  | 0.56962300  |
| O | -1.33991500 | 3.02023500  | 0.39223100  |
| O | -1.97542100 | 1.39146700  | 1.73970900  |
| C | -1.11143500 | -1.41651900 | 0.55792900  |
| C | -1.24190700 | -2.87710400 | 0.12761800  |
| H | -0.71150800 | -3.51570400 | 0.84397200  |
| H | -2.28900400 | -3.19770100 | 0.10127700  |
| H | -0.81627600 | -3.03476400 | -0.86928000 |

|   |             |             |             |
|---|-------------|-------------|-------------|
| N | -1.77834700 | -1.21030000 | 1.87717000  |
| H | -1.25168500 | -1.64011900 | 2.63629400  |
| H | -2.68691800 | -1.67007500 | 1.87771500  |
| N | 0.26484200  | -0.98485700 | 0.75963300  |
| H | -1.95030300 | 0.36630700  | 1.83838100  |
| H | 0.63123600  | -1.39457500 | 1.61609400  |
| C | 2.47437500  | -0.49580300 | -0.20832900 |
| C | 2.53034600  | 0.75715900  | 0.40829700  |
| C | 3.64721900  | -1.02900800 | -0.75036200 |
| C | 3.72994900  | 1.46283900  | 0.47414100  |
| H | 1.62407800  | 1.17285800  | 0.84514500  |
| C | 4.84672000  | -0.32433900 | -0.69012000 |
| H | 3.61775400  | -2.01081700 | -1.22248600 |
| C | 4.89219800  | 0.92636400  | -0.07635700 |
| H | 3.75641900  | 2.43634300  | 0.95901100  |
| H | 5.74981900  | -0.75616200 | -1.11590600 |
| H | 5.82863700  | 1.47686500  | -0.02348300 |
| C | 1.18281700  | -1.26247700 | -0.33776300 |
| H | 1.41539000  | -2.33660000 | -0.44203500 |
| H | 0.67867900  | -0.97675500 | -1.27341200 |

#### H<sub>2</sub>O-27

|   |             |             |             |
|---|-------------|-------------|-------------|
| C | 4.39002700  | 0.19337300  | 0.09296400  |
| C | 3.77857300  | -0.64202100 | -1.02332400 |
| C | 2.30101400  | -0.66264600 | -0.64564700 |
| C | 3.36973400  | 1.30470500  | 0.29781600  |
| H | 4.48659600  | -0.40680100 | 1.00590600  |
| H | 5.37713500  | 0.59400700  | -0.15234200 |
| H | 4.18601100  | -1.65345600 | -1.09408300 |
| H | 3.91105200  | -0.14533100 | -1.99308700 |
| H | 1.67001300  | -0.85088600 | -1.51943100 |
| H | 3.60316500  | 2.18083500  | -0.32060200 |
| H | 3.29578400  | 1.62596900  | 1.34191200  |
| N | 2.08777500  | 0.71247800  | -0.15581700 |
| C | 2.00012500  | -1.73741500 | 0.43343200  |
| O | 2.13941800  | -2.91706000 | 0.03000000  |
| O | 1.64220000  | -1.34272600 | 1.56718200  |
| C | 0.94197700  | 1.36296700  | -0.03790000 |
| C | 0.98146500  | 2.76280300  | 0.48811600  |
| H | -0.00826000 | 3.21993500  | 0.44433000  |
| H | 1.31511300  | 2.76147600  | 1.53116800  |
| H | 1.67981300  | 3.37918400  | -0.08512300 |
| N | -2.56122600 | 2.73136900  | -0.07134300 |
| H | -2.82393600 | 2.82558500  | 0.90662000  |
| H | -2.55783300 | 3.66861300  | -0.46527800 |
| N | -0.26727200 | 0.90767800  | -0.34528200 |
| H | -3.31955300 | 2.22665300  | -0.52565200 |
| H | -1.02949900 | 1.60564300  | -0.25510900 |
| C | -2.17393500 | -0.57776300 | -0.37879700 |
| C | -2.49962300 | -0.65110500 | 0.97866700  |
| C | -3.19151400 | -0.63184300 | -1.32963100 |
| C | -3.82639700 | -0.76087800 | 1.37965500  |
| H | -1.70222700 | -0.61009100 | 1.72112200  |

|   |             |             |             |
|---|-------------|-------------|-------------|
| C | -4.52329700 | -0.74833900 | -0.93070100 |
| H | -2.94111600 | -0.57527300 | -2.38806700 |
| C | -4.84214000 | -0.80659500 | 0.42333400  |
| H | -4.07129800 | -0.81285400 | 2.43782400  |
| H | -5.31048700 | -0.78902400 | -1.67973500 |
| H | -5.88031400 | -0.89114800 | 0.73532300  |
| C | -0.73528300 | -0.41115000 | -0.78622400 |
| H | -0.63615400 | -0.50775400 | -1.87513800 |
| H | -0.13625400 | -1.19224000 | -0.31148500 |

### H<sub>2</sub>O-28

|   |             |             |             |
|---|-------------|-------------|-------------|
| C | -0.67119600 | -0.94608000 | 0.91015700  |
| N | -0.93235900 | -2.13697600 | 0.10232700  |
| H | -1.80333200 | -2.57888800 | 0.38735500  |
| N | 0.74482100  | -0.65815900 | 0.79911600  |
| H | 1.02445200  | 0.03500700  | 1.48927100  |
| C | 2.73388300  | -0.02446600 | -0.43018600 |
| C | 3.20308000  | 1.28875900  | -0.37050700 |
| C | 3.65388600  | -1.07490900 | -0.36462200 |
| C | 4.56745800  | 1.55224300  | -0.25350900 |
| H | 2.48963100  | 2.11188400  | -0.42097700 |
| C | 5.01654500  | -0.81735600 | -0.25040800 |
| H | 3.29117600  | -2.10177900 | -0.40637000 |
| C | 5.47650600  | 0.49884700  | -0.19481000 |
| H | 4.91941600  | 2.58049200  | -0.21179100 |
| H | 5.72317800  | -1.64311300 | -0.20737700 |
| H | 6.54159600  | 0.70102100  | -0.10851700 |
| C | 1.26065000  | -0.30335200 | -0.52257300 |
| H | 1.07334800  | -1.14642600 | -1.19948300 |
| H | 0.75656400  | 0.57785800  | -0.95777100 |
| H | -0.19702300 | -2.80973900 | 0.30904900  |
| C | -0.98534400 | -1.17244500 | 2.38870300  |
| H | -0.43889000 | -2.05180300 | 2.74478200  |
| H | -0.69602300 | -0.31907000 | 3.01268800  |
| H | -2.05740400 | -1.35061300 | 2.53533300  |
| N | -1.48169300 | 0.15360600  | 0.32659900  |
| C | -2.54362000 | 2.24593600  | 0.51588700  |
| C | -3.61050000 | 1.17521400  | 0.70290500  |
| C | -2.92274900 | -0.08152500 | 0.15258300  |
| C | -1.28112900 | 1.49554500  | 0.90125600  |
| H | -2.49462500 | 2.56689000  | -0.53383000 |
| H | -2.70878300 | 3.13418600  | 1.13204000  |
| H | -4.56197700 | 1.38426000  | 0.20501500  |
| H | -3.81090400 | 1.02947600  | 1.77225200  |
| H | -3.28657800 | -0.97615700 | 0.67670100  |
| H | -1.19062700 | 1.46135000  | 1.99980600  |
| H | -0.36638200 | 1.95479400  | 0.50497400  |
| C | -3.25821000 | -0.28643800 | -1.32320400 |
| O | -4.37652700 | -0.55384600 | -1.71596700 |
| O | -2.23540100 | -0.12195600 | -2.15177700 |
| H | -1.46233200 | 0.03765900  | -1.54751800 |

### H<sub>2</sub>O-29

|   |             |             |             |
|---|-------------|-------------|-------------|
| C | 0.66290400  | 1.22302200  | 0.53035200  |
| N | 0.93397900  | 2.19115500  | -0.51298600 |
| H | 0.96375300  | 1.76950600  | -1.43723300 |
| N | -0.75752300 | 0.91722600  | 0.52953200  |
| H | -1.00139700 | 0.35896400  | 1.34468100  |
| C | -2.75640600 | -0.02696200 | -0.46191400 |
| C | -3.17554300 | -1.34972600 | -0.31305500 |
| C | -3.70454000 | 0.99698500  | -0.37262900 |
| C | -4.51892900 | -1.64777600 | -0.08309200 |
| H | -2.44187600 | -2.15311200 | -0.38168600 |
| C | -5.04471400 | 0.70490300  | -0.14309500 |
| H | -3.37909100 | 2.03074200  | -0.48437800 |
| C | -5.45544800 | -0.62114000 | 0.00229600  |
| H | -4.83199900 | -2.68337500 | 0.02869100  |
| H | -5.77302200 | 1.51020700  | -0.07904800 |
| H | -6.50321800 | -0.85145500 | 0.18096400  |
| C | -1.30727400 | 0.30722800  | -0.67830600 |
| H | -1.21704900 | 1.03154400  | -1.50014100 |
| H | -0.76592100 | -0.60578700 | -0.98628500 |
| H | 1.81334100  | 2.67426200  | -0.36091700 |
| C | 0.99789900  | 1.85725500  | 1.87528100  |
| H | 0.44766200  | 2.79671600  | 1.98047100  |
| H | 0.71791700  | 1.20163300  | 2.70624500  |
| H | 2.06929800  | 2.07096600  | 1.96291800  |
| N | 1.44710600  | -0.03491700 | 0.29158800  |
| C | 2.39845400  | -2.02008500 | 1.15551900  |
| C | 3.48256500  | -0.95028900 | 1.16087200  |
| C | 2.91053500  | 0.09703000  | 0.19851000  |
| C | 1.13096900  | -1.18243900 | 1.16669700  |
| H | 2.45351400  | -2.61992100 | 0.23647900  |
| H | 2.45597100  | -2.70430000 | 2.00667500  |
| H | 4.47333600  | -1.30099100 | 0.85706900  |
| H | 3.56980100  | -0.50476100 | 2.16042300  |
| H | 3.26823000  | 1.10321800  | 0.45429500  |
| H | 0.91121600  | -0.85631500 | 2.19692800  |
| H | 0.25273600  | -1.72477800 | 0.79299100  |
| C | 3.37748000  | -0.16645900 | -1.23091100 |
| O | 4.53223200  | -0.05046900 | -1.58650600 |
| O | 2.41382500  | -0.55451600 | -2.06097400 |
| H | 1.59568700  | -0.54662700 | -1.49538900 |

### H<sub>2</sub>O-30

|   |             |             |             |
|---|-------------|-------------|-------------|
| C | -0.79052400 | 1.40653700  | 0.14767800  |
| N | -0.71431100 | 2.36536200  | 1.22636000  |
| H | -0.41296600 | 1.94147000  | 2.09976000  |
| N | 0.56512500  | 0.93848800  | -0.16681000 |
| H | 0.54035600  | 0.00959800  | -0.57970700 |
| C | 2.84821200  | 0.30459300  | 0.28776600  |
| C | 3.05633700  | -1.03964500 | 0.60522200  |
| C | 3.74911400  | 0.94588200  | -0.56597700 |
| C | 4.14836700  | -1.73155200 | 0.08512000  |
| H | 2.35589400  | -1.54463200 | 1.27179000  |
| C | 4.84358500  | 0.25996100  | -1.08538000 |



|   |             |             |             |
|---|-------------|-------------|-------------|
| H | 3.58621800  | 1.99315100  | -0.81913100 |
| C | 5.04522800  | -1.08135500 | -0.76019300 |
| H | 4.30187100  | -2.77690700 | 0.34304500  |
| H | 5.54255500  | 0.77219000  | -1.74263300 |
| H | 5.90138200  | -1.61719600 | -1.16331700 |
| C | 1.64279000  | 1.02624600  | 0.81989500  |
| H | 1.87831600  | 2.08466900  | 0.98737100  |
| H | 1.38699500  | 0.59485500  | 1.80443500  |
| H | -1.63576400 | 2.76318600  | 1.38825900  |
| C | -1.34871700 | 2.13568000  | -1.07038900 |
| H | -0.70453100 | 2.99387500  | -1.27902500 |
| H | -1.35491500 | 1.50049000  | -1.96182200 |
| H | -2.36839200 | 2.49655400  | -0.88810200 |
| N | -1.72359500 | 0.28710700  | 0.49473300  |
| C | -2.09824600 | -1.79598700 | 1.54780900  |
| C | -1.83015100 | -2.07700000 | 0.07558300  |
| C | -2.02654600 | -0.69602800 | -0.56427600 |
| C | -1.40916600 | -0.45640000 | 1.73292200  |
| H | -3.17681800 | -1.70516000 | 1.73662600  |
| H | -1.70295300 | -2.56571100 | 2.21659800  |
| H | -2.47481700 | -2.83943200 | -0.37166700 |
| H | -0.78736400 | -2.39232900 | -0.06320200 |
| H | -1.39558500 | -0.58776700 | -1.45631500 |
| H | -0.32380000 | -0.62126700 | 1.83412200  |
| H | -1.75870300 | 0.09194600  | 2.61437300  |
| C | -3.46808400 | -0.52797600 | -1.04104500 |
| O | -3.93767400 | -1.15600800 | -1.96803800 |
| O | -4.17899100 | 0.34666300  | -0.33953000 |
| H | -3.52739700 | 0.70874400  | 0.32069800  |

### H<sub>2</sub>O-31

|   |             |             |             |
|---|-------------|-------------|-------------|
| C | -0.80672400 | 1.40554100  | 0.11982000  |
| N | -0.85637800 | 2.37026500  | 1.19880200  |
| H | -0.32939200 | 3.19986900  | 0.93839700  |
| N | 0.57295000  | 0.97817100  | -0.18907600 |
| H | 0.58474100  | 0.10805900  | -0.71628300 |
| C | 2.82969300  | 0.26998800  | 0.29714700  |
| C | 2.97730700  | -1.10588400 | 0.49156600  |
| C | 3.79881600  | 0.95796400  | -0.43621400 |
| C | 4.07699900  | -1.78271000 | -0.03144700 |
| H | 2.22229400  | -1.64791600 | 1.06282600  |
| C | 4.90180100  | 0.28637400  | -0.95770200 |
| H | 3.68461700  | 2.03019600  | -0.59320500 |
| C | 5.04301200  | -1.08608300 | -0.75526300 |
| H | 4.18286000  | -2.85297900 | 0.13027300  |
| H | 5.65457000  | 0.83434400  | -1.51981000 |
| H | 5.90559200  | -1.61080600 | -1.15931600 |
| C | 1.61888300  | 0.97949600  | 0.83426600  |
| H | 1.88011300  | 2.01910200  | 1.07641400  |
| H | 1.32566800  | 0.49769700  | 1.78273100  |
| H | -0.44277300 | 2.01272700  | 2.05593600  |
| C | -1.35688300 | 2.09042100  | -1.12690900 |
| H | -0.76419800 | 2.98937100  | -1.32355200 |

|   |             |             |             |
|---|-------------|-------------|-------------|
| H | -1.27478900 | 1.45302200  | -2.01339600 |
| H | -2.40285200 | 2.38261100  | -0.98703900 |
| N | -1.70760700 | 0.28862200  | 0.49611500  |
| C | -2.13931900 | -1.73988600 | 1.61276700  |
| C | -1.86510900 | -2.07852000 | 0.15317800  |
| C | -2.00910500 | -0.71468600 | -0.53843900 |
| C | -1.40558700 | -0.41999000 | 1.75547800  |
| H | -3.21557700 | -1.60622600 | 1.78759000  |
| H | -1.77454600 | -2.49948300 | 2.30978200  |
| H | -2.52816200 | -2.83548000 | -0.27592500 |
| H | -0.83065900 | -2.42871200 | 0.03861500  |
| H | -1.35607900 | -0.65618500 | -1.41952500 |
| H | -0.32762900 | -0.62315700 | 1.85524500  |
| H | -1.73098900 | 0.17181900  | 2.61812400  |
| C | -3.43750000 | -0.52597900 | -1.04713800 |
| O | -3.89819800 | -1.15073100 | -1.98081100 |
| O | -4.14943600 | 0.35912300  | -0.35953300 |
| H | -3.50218600 | 0.71930900  | 0.30732100  |

### H<sub>2</sub>O-32

|   |             |             |             |
|---|-------------|-------------|-------------|
| C | -0.66355100 | -0.99786400 | 0.18864300  |
| N | -1.00134600 | -1.64704700 | -1.09210100 |
| H | -0.68720000 | -2.61493600 | -1.11270100 |
| N | 0.78173300  | -0.76657800 | 0.31163200  |
| H | 0.93322200  | -0.04688000 | 1.01523900  |
| C | 2.99220000  | -0.12948200 | -0.42601200 |
| C | 3.39632600  | 1.20676700  | -0.43532100 |
| C | 3.88239500  | -1.10264500 | 0.03694000  |
| C | 4.66809000  | 1.56785000  | 0.00798700  |
| H | 2.70807000  | 1.96987800  | -0.79889400 |
| C | 5.15297500  | -0.74733400 | 0.47845000  |
| H | 3.57041000  | -2.14657900 | 0.04628400  |
| C | 5.54844600  | 0.59091900  | 0.46563300  |
| H | 4.97056400  | 2.61240300  | -0.00663000 |
| H | 5.83916100  | -1.51405900 | 0.83106400  |
| H | 6.54225100  | 0.86906600  | 0.80868300  |
| C | 1.60725700  | -0.51333800 | -0.86797700 |
| H | 1.66140700  | -1.43394000 | -1.46612800 |
| H | 1.21960100  | 0.28065500  | -1.53113400 |
| H | -0.57318500 | -1.17781800 | -1.88684900 |
| C | -1.06688700 | -1.95378300 | 1.30469300  |
| H | -0.46226400 | -2.86193400 | 1.22539000  |
| H | -0.86408000 | -1.49280600 | 2.27720200  |
| H | -2.12423100 | -2.23649800 | 1.25929100  |
| N | -1.39024700 | 0.25237900  | 0.31956800  |
| C | -2.26684300 | 2.33363800  | -0.40573800 |
| C | -2.92268600 | 1.88027400  | 0.89480600  |
| C | -2.74906200 | 0.36178800  | 0.82263800  |
| C | -1.09231700 | 1.36670700  | -0.58691000 |
| H | -2.97899300 | 2.22030100  | -1.23455300 |
| H | -1.95028300 | 3.38039700  | -0.38965400 |
| H | -3.96909200 | 2.18044900  | 0.98933800  |
| H | -2.36965800 | 2.25226000  | 1.76489900  |

|   |             |             |             |
|---|-------------|-------------|-------------|
| H | -2.84146500 | -0.08894800 | 1.82062400  |
| H | -0.13361500 | 1.83168100  | -0.31227800 |
| H | -1.01226100 | 1.05122400  | -1.64086500 |
| C | -3.88946300 | -0.24710500 | -0.01217300 |
| O | -5.05152000 | -0.00972600 | 0.27151700  |
| O | -3.59580700 | -1.03105600 | -1.03530700 |
| H | -2.61198900 | -1.27729200 | -1.11564800 |

### H<sub>2</sub>O-33

|   |             |             |             |
|---|-------------|-------------|-------------|
| C | -0.68865500 | -0.00770400 | 0.93499400  |
| N | 0.03182100  | -2.33928600 | -1.18349600 |
| H | 0.04003900  | -3.19230700 | -1.73621900 |
| N | 0.59990500  | 0.21792500  | 0.68047700  |
| H | 0.85234200  | 0.92753800  | 0.00224600  |
| C | 2.98574800  | -0.19799300 | 0.53958900  |
| C | 3.43937100  | -0.96855800 | -0.53308200 |
| C | 3.71357900  | 0.92801100  | 0.93154500  |
| C | 4.60900200  | -0.62017200 | -1.20401900 |
| H | 2.86786400  | -1.84598900 | -0.83417400 |
| C | 4.88106000  | 1.28003100  | 0.25938900  |
| H | 3.36406000  | 1.52700100  | 1.77198100  |
| C | 5.33013000  | 0.50498700  | -0.80869500 |
| H | 4.95799200  | -1.22800200 | -2.03527200 |
| H | 5.44399800  | 2.15615500  | 0.57197000  |
| H | 6.24377200  | 0.77667300  | -1.33199300 |
| C | 1.71090300  | -0.55951300 | 1.24486700  |
| H | 1.79276200  | -0.35145000 | 2.32007200  |
| H | 1.49607500  | -1.62566700 | 1.10554400  |
| H | 0.52061200  | -1.63916300 | -1.73651600 |
| C | -1.02780700 | -1.04913200 | 1.93783400  |
| H | -0.47341400 | -0.87875500 | 2.86569200  |
| H | -2.09174000 | -1.08365900 | 2.16304800  |
| H | -0.72625500 | -2.02390200 | 1.53567000  |
| N | -1.61658200 | 0.68160900  | 0.30044500  |
| C | -2.66425300 | 1.98533800  | -1.36516600 |
| C | -3.60583700 | 1.80214400  | -0.18093100 |
| C | -3.07200000 | 0.53970600  | 0.49415600  |
| C | -1.30217500 | 1.62285600  | -0.78824700 |
| H | -2.92573200 | 1.28908700  | -2.17094100 |
| H | -2.67502400 | 2.99781600  | -1.77643900 |
| H | -4.65460500 | 1.68761600  | -0.46534000 |
| H | -3.52637000 | 2.65411300  | 0.50603500  |
| H | -3.30875900 | 0.53458000  | 1.56361000  |
| H | -0.78619200 | 2.50063300  | -0.37406600 |
| H | -0.64559100 | 1.14088700  | -1.52480900 |
| C | -3.64804400 | -0.75231700 | -0.14330700 |
| O | -4.86644200 | -0.93079000 | 0.08463000  |
| O | -2.87019400 | -1.47595800 | -0.80939200 |
| H | -0.94489400 | -2.03706600 | -1.11755200 |

### H<sub>2</sub>O-34

|   |             |             |            |
|---|-------------|-------------|------------|
| N | -0.33630700 | -0.90070200 | 0.38975500 |
| H | -0.83588500 | -1.40839000 | 1.11857800 |

|   |             |             |             |
|---|-------------|-------------|-------------|
| H | -0.11196400 | 0.81209300  | 0.59177500  |
| C | -2.53533500 | -0.27595000 | -0.47296000 |
| C | -3.49329300 | -1.11630500 | 0.10347500  |
| C | -2.86721000 | 1.05999200  | -0.70868400 |
| C | -4.75204700 | -0.63115700 | 0.44794700  |
| H | -3.25108100 | -2.16584200 | 0.27458500  |
| C | -4.12784900 | 1.54848300  | -0.37054700 |
| H | -2.12879400 | 1.72175800  | -1.15877500 |
| C | -5.07201000 | 0.70493300  | 0.21050300  |
| H | -5.48655000 | -1.29837000 | 0.89307400  |
| H | -4.37330000 | 2.59030800  | -0.56395500 |
| H | -6.05622000 | 1.08537600  | 0.47362900  |
| C | -1.17822700 | -0.82162500 | -0.82135000 |
| H | -0.66707300 | -0.17053800 | -1.54131500 |
| H | -1.28900400 | -1.80430200 | -1.29986000 |
| C | 3.99188800  | 0.42043800  | -0.92306900 |
| C | 3.74683100  | 0.88557400  | 0.50492300  |
| C | 2.24590000  | 0.68139700  | 0.67040700  |
| C | 3.10164700  | -0.80422500 | -0.99678400 |
| H | 3.65059300  | 1.18249600  | -1.63704200 |
| H | 5.04009500  | 0.19238700  | -1.13787600 |
| H | 4.04800700  | 1.91725500  | 0.70269600  |
| H | 4.27845400  | 0.22863000  | 1.20609400  |
| H | 1.99829600  | 0.40993200  | 1.70736700  |
| H | 3.61283300  | -1.65095600 | -0.49748500 |
| H | 2.86346500  | -1.10967000 | -2.02070200 |
| N | 1.88480500  | -0.39734800 | -0.27872600 |
| C | 1.43221900  | 1.93811400  | 0.36982800  |
| O | 1.91619800  | 3.02445900  | 0.11370200  |
| O | 0.11643300  | 1.78123400  | 0.43995200  |
| C | 1.01348700  | -1.47070600 | 0.21942900  |
| C | 1.45343400  | -2.03071000 | 1.57793300  |
| H | 1.30087600  | -1.32582100 | 2.40255300  |
| H | 0.88298800  | -2.93770600 | 1.80919700  |
| H | 2.51610900  | -2.30031500 | 1.54428600  |
| N | 0.99120200  | -2.51923600 | -0.79967800 |
| H | 1.89147700  | -2.99305600 | -0.83167300 |
| H | 0.32110500  | -3.22933300 | -0.51014200 |

## H<sub>2</sub>O-35

|   |             |             |             |
|---|-------------|-------------|-------------|
| N | -0.20239900 | -1.14988400 | 0.60401900  |
| H | -0.57395200 | -1.64873900 | 1.40757100  |
| H | 0.89371000  | 0.64515300  | -1.49427000 |
| C | -2.43568100 | -0.51795300 | -0.20202900 |
| C | -3.62350800 | -1.00788500 | -0.75209800 |
| C | -2.49199900 | 0.62828800  | 0.59659000  |
| C | -4.83754000 | -0.36410900 | -0.52546700 |
| H | -3.59474400 | -1.90859400 | -1.36499500 |
| C | -3.70489900 | 1.27322600  | 0.82804300  |
| H | -1.57655300 | 1.01037800  | 1.04482000  |
| C | -4.88207800 | 0.78116500  | 0.26699600  |
| H | -5.75135300 | -0.76265800 | -0.96072900 |
| H | -3.73003100 | 2.16404400  | 1.45215200  |

|   |             |             |             |
|---|-------------|-------------|-------------|
| H | -5.82889600 | 1.28372200  | 0.45107000  |
| C | -1.13460900 | -1.21342200 | -0.51177500 |
| H | -0.66107400 | -0.73430200 | -1.37987100 |
| H | -1.35338700 | -2.24501900 | -0.83460900 |
| C | 3.88034500  | 0.77255100  | -0.71185800 |
| C | 3.30390400  | 1.34796800  | 0.57602000  |
| C | 1.84331700  | 0.88567400  | 0.51468800  |
| C | 3.22799200  | -0.59876100 | -0.76232600 |
| H | 3.57388300  | 1.37747600  | -1.57652900 |
| H | 4.97241900  | 0.71503600  | -0.71400100 |
| H | 3.39869200  | 2.43380000  | 0.67275500  |
| H | 3.78788400  | 0.88467800  | 1.44580900  |
| H | 1.40798500  | 0.75781300  | 1.51277400  |
| H | 3.78486100  | -1.29001800 | -0.10678800 |
| H | 3.20218800  | -1.03282500 | -1.76762800 |
| N | 1.85693200  | -0.36501900 | -0.26231300 |
| C | 0.97924800  | 1.93013400  | -0.18362500 |
| O | 0.71367200  | 3.01022500  | 0.30503600  |
| O | 0.55472400  | 1.57495900  | -1.39167200 |
| C | 1.17769800  | -1.52233500 | 0.36751900  |
| C | 1.79705200  | -1.88761700 | 1.72017300  |
| H | 1.67304100  | -1.09141100 | 2.46307500  |
| H | 1.32083000  | -2.79404400 | 2.11201700  |
| H | 2.86660900  | -2.09774500 | 1.61450100  |
| N | 1.27387900  | -2.62905600 | -0.58993800 |
| H | 2.22920500  | -2.97803300 | -0.63804500 |
| H | 0.71717700  | -3.40401600 | -0.23348000 |

## H<sub>2</sub>O-36

|   |             |             |             |
|---|-------------|-------------|-------------|
| N | -0.42500900 | 1.14666600  | -0.22873800 |
| H | -0.96988000 | 1.93768000  | -0.55900900 |
| H | 1.62987200  | 0.16476600  | 1.81189600  |
| C | -2.51414100 | 0.05537600  | 0.32686600  |
| C | -3.60000500 | 0.92737200  | 0.42721800  |
| C | -2.69642200 | -1.18516600 | -0.28948000 |
| C | -4.84702300 | 0.56974200  | -0.08250500 |
| H | -3.46630700 | 1.89316600  | 0.91509200  |
| C | -3.94137300 | -1.54922500 | -0.79475000 |
| H | -1.85521600 | -1.87453100 | -0.36415800 |
| C | -5.01912000 | -0.66994200 | -0.69448400 |
| H | -5.68522500 | 1.25731300  | 0.00365800  |
| H | -4.07278400 | -2.52144900 | -1.26431100 |
| H | -5.99254400 | -0.95408500 | -1.08736100 |
| C | -1.16103800 | 0.46475500  | 0.83905300  |
| H | -0.61128800 | -0.42902500 | 1.15501500  |
| H | -1.29022000 | 1.08870600  | 1.74042100  |
| C | 3.86986600  | -0.64447300 | -0.97054300 |
| C | 2.66441500  | -1.48474500 | -1.38438000 |
| C | 1.56363400  | -0.90517300 | -0.49230700 |
| C | 3.28205600  | 0.74715300  | -0.70537100 |
| H | 4.30449000  | -1.05337900 | -0.04821100 |
| H | 4.66323000  | -0.62593100 | -1.72326500 |
| H | 2.80581300  | -2.55884600 | -1.24032000 |

|   |            |             |             |
|---|------------|-------------|-------------|
| H | 2.39784300 | -1.30108600 | -2.43151000 |
| H | 0.56274900 | -1.12606400 | -0.88923400 |
| H | 3.48914700 | 1.43743900  | -1.53545200 |
| H | 3.72511200 | 1.18959100  | 0.20367500  |
| N | 1.84032200 | 0.51274900  | -0.58463000 |
| C | 1.63548500 | -1.58026900 | 0.88957400  |
| O | 1.56624900 | -2.79487400 | 0.98287600  |
| O | 1.77862300 | -0.83165400 | 1.97092900  |
| C | 0.96459300 | 1.54028700  | -0.05041800 |
| C | 1.18469500 | 2.84126900  | -0.81379400 |
| H | 0.94342100 | 2.70514400  | -1.87383800 |
| H | 0.54612800 | 3.62737200  | -0.39532600 |
| H | 2.22193800 | 3.18045300  | -0.73583100 |
| N | 1.27942100 | 1.72340900  | 1.39960700  |
| H | 2.14964000 | 2.24507300  | 1.49510100  |
| H | 0.56823000 | 2.28837700  | 1.86078100  |

### H<sub>2</sub>O-37

|   |             |             |             |
|---|-------------|-------------|-------------|
| N | 0.00950900  | 1.61080100  | -1.02551700 |
| H | 0.05923300  | 2.54655600  | -1.40575300 |
| H | -3.47648100 | 0.09613400  | -1.16322900 |
| C | 2.20388900  | 0.44324000  | -0.69586700 |
| C | 2.53582700  | 1.27283400  | 0.37452400  |
| C | 3.02154300  | -0.65291500 | -0.98750800 |
| C | 3.66856400  | 1.00916200  | 1.14396100  |
| H | 1.90670100  | 2.12656500  | 0.61893200  |
| C | 4.15407500  | -0.91338300 | -0.22299800 |
| H | 2.76060400  | -1.31087200 | -1.81629800 |
| C | 4.48032500  | -0.08220500 | 0.84821800  |
| H | 3.91401200  | 1.66047300  | 1.97945300  |
| H | 4.77852000  | -1.77171400 | -0.45914600 |
| H | 5.36121200  | -0.28865500 | 1.45106800  |
| C | 0.99727400  | 0.68499700  | -1.57004900 |
| H | 0.51769400  | -0.26092600 | -1.84113300 |
| H | 1.31592300  | 1.12891100  | -2.51992600 |
| C | -2.39264400 | -1.13418300 | 1.96096800  |
| C | -0.98943300 | -1.67614900 | 1.73079400  |
| C | -0.55681700 | -0.95898000 | 0.45419000  |
| C | -2.24316500 | 0.34311600  | 1.64454500  |
| H | -3.10127300 | -1.59733700 | 1.26165200  |
| H | -2.76254600 | -1.29514000 | 2.97697700  |
| H | -0.94323700 | -2.76116100 | 1.60967700  |
| H | -0.33074000 | -1.39335100 | 2.56209700  |
| H | 0.53310200  | -0.86587100 | 0.40777700  |
| H | -1.90755400 | 0.91121600  | 2.52246400  |
| H | -3.15800600 | 0.79367900  | 1.24919100  |
| N | -1.17230000 | 0.37743500  | 0.61383700  |
| C | -1.04311400 | -1.70698700 | -0.81336500 |
| O | -0.44831400 | -2.78992800 | -1.02076800 |
| O | -1.94621200 | -1.17708000 | -1.50413900 |
| C | -0.91920900 | 1.47404000  | -0.07221100 |
| C | -1.73437800 | 2.69039500  | 0.21515700  |
| H | -1.70239000 | 2.93426800  | 1.28120700  |

|   |             |            |             |
|---|-------------|------------|-------------|
| H | -1.37753700 | 3.55353400 | -0.34892000 |
| H | -2.77712600 | 2.48315200 | -0.06233700 |
| N | -4.25637000 | 0.73685400 | -0.98134700 |
| H | -4.98837700 | 0.19316000 | -0.53141400 |

### H<sub>2</sub>O-38

|   |             |             |             |
|---|-------------|-------------|-------------|
| N | 0.70626000  | -0.13046100 | 0.21376400  |
| H | 0.88669000  | 0.19816200  | -0.73404400 |
| C | 3.10796600  | -0.45965200 | 0.24825400  |
| C | 3.89124700  | -1.05647300 | -0.73994300 |
| C | 3.57230400  | 0.70425400  | 0.86961600  |
| C | 5.12092000  | -0.50527100 | -1.10044000 |
| H | 3.53568800  | -1.96260200 | -1.22920800 |
| C | 4.79670600  | 1.25854600  | 0.51154900  |
| H | 2.96210700  | 1.17266700  | 1.64112000  |
| C | 5.57489800  | 0.65336100  | -0.47642700 |
| H | 5.72240500  | -0.98236800 | -1.87075400 |
| H | 5.14839400  | 2.16181200  | 1.00492900  |
| H | 6.53325200  | 1.08458500  | -0.75621700 |
| C | 1.77583700  | -1.03922500 | 0.63448700  |
| H | 1.73196200  | -1.14672200 | 1.72609100  |
| H | 1.66955400  | -2.04740200 | 0.20079800  |
| C | -2.25063000 | 2.67144200  | -0.54214400 |
| C | -3.48157300 | 1.76752200  | -0.41893100 |
| C | -2.94190100 | 0.46185400  | 0.19671900  |
| C | -1.10729400 | 1.83952100  | 0.01958500  |
| H | -2.05873400 | 2.91922200  | -1.59148300 |
| H | -2.36131300 | 3.61396000  | 0.00248500  |
| H | -3.92351600 | 1.56337200  | -1.40074200 |
| H | -4.27168700 | 2.18393500  | 0.21100600  |
| H | -3.01923600 | 0.54919200  | 1.29788400  |
| H | -0.98209500 | 2.02208700  | 1.10318200  |
| H | -0.15394200 | 2.06074600  | -0.46168900 |
| N | -1.52889000 | 0.44456500  | -0.22373500 |
| C | -3.88746900 | -0.66873400 | -0.17619800 |
| O | -5.06788000 | -0.56026400 | 0.10212100  |
| O | -3.44797800 | -1.74175700 | -0.81194100 |
| C | -0.64514900 | -0.59680300 | 0.31948100  |
| C | -0.97226900 | -1.03536800 | 1.73445500  |
| H | -1.97905500 | -1.45813700 | 1.79505500  |
| H | -0.28200900 | -1.81283500 | 2.06971300  |
| H | -0.90414000 | -0.18200200 | 2.41742800  |
| O | -0.84732100 | -1.78728400 | -0.49602800 |
| H | -0.45782600 | -1.60402600 | -1.36485500 |
| H | -2.45421300 | -1.78778400 | -0.82451500 |

### H<sub>2</sub>O-40

|   |            |            |             |
|---|------------|------------|-------------|
| C | 2.17322400 | 2.28801000 | 0.83329800  |
| C | 1.94103400 | 2.00191300 | -0.64533500 |
| C | 2.04798900 | 0.48377300 | -0.71664200 |
| C | 1.40336900 | 1.16289500 | 1.50484700  |
| H | 3.24374800 | 2.21114000 | 1.06781500  |
| H | 1.82688400 | 3.27719200 | 1.14650400  |

|   |             |             |             |
|---|-------------|-------------|-------------|
| H | 2.65114700  | 2.49592300  | -1.31274900 |
| H | 0.92730800  | 2.30906400  | -0.93344200 |
| H | 1.42620300  | 0.06552300  | -1.52156700 |
| H | 0.32991900  | 1.41170700  | 1.57576500  |
| H | 1.76529000  | 0.94960900  | 2.51847200  |
| N | 1.62287500  | 0.01788800  | 0.61651100  |
| C | 3.48223100  | 0.01843700  | -0.99470900 |
| O | 4.38625900  | 0.75641800  | -1.33225800 |
| O | 3.70312400  | -1.28825300 | -0.85790700 |
| C | 0.76429200  | -1.13606800 | 0.79235600  |
| C | 1.03870000  | -1.79869800 | 2.13356500  |
| H | 0.43986300  | -2.71129000 | 2.24057700  |
| H | 2.09885500  | -2.06155500 | 2.19587400  |
| H | 0.78369900  | -1.13011300 | 2.96053200  |
| N | -0.64092200 | -0.82477700 | 0.72178100  |
| H | -1.20655600 | -1.60840800 | 1.03941200  |
| C | -2.64452400 | -0.02514800 | -0.40755400 |
| C | -3.53848300 | -0.62250700 | -1.29661200 |
| C | -3.14662100 | 0.81636600  | 0.59120000  |
| C | -4.90917900 | -0.38368700 | -1.19629600 |
| H | -3.15702700 | -1.28187500 | -2.07547500 |
| C | -4.51268400 | 1.05561800  | 0.69601100  |
| H | -2.45230800 | 1.28338700  | 1.28902800  |
| C | -5.39925800 | 0.45535700  | -0.19954300 |
| H | -5.59348300 | -0.85620100 | -1.89733700 |
| H | -4.88910800 | 1.71511500  | 1.47487500  |
| H | -6.46743600 | 0.64280200  | -0.11867300 |
| C | -1.16462000 | -0.26878400 | -0.51984000 |
| H | -0.66026600 | 0.69157800  | -0.70136900 |
| H | -0.96123200 | -0.90848500 | -1.39510700 |
| O | 1.18126900  | -2.02922100 | -0.26529200 |
| H | 2.86970500  | -1.74892200 | -0.59626100 |
| H | 0.77309000  | -2.89439300 | -0.12973700 |

## H<sub>2</sub>O-42

|   |             |             |             |
|---|-------------|-------------|-------------|
| C | -0.61765000 | -0.67435400 | 0.26173000  |
| N | 0.73428100  | -0.18559400 | 0.27033200  |
| H | 0.89871100  | 0.48356600  | -0.47875500 |
| C | 3.14031900  | -0.47906800 | 0.13198000  |
| C | 3.88645500  | -0.62736300 | -1.03748600 |
| C | 3.63335600  | 0.34253000  | 1.15073800  |
| C | 5.10850600  | 0.02802500  | -1.18821100 |
| H | 3.50880300  | -1.26653600 | -1.83482300 |
| C | 4.85039100  | 0.99982200  | 1.00351400  |
| H | 3.05320900  | 0.46015800  | 2.06540200  |
| C | 5.59178700  | 0.84317500  | -0.16833400 |
| H | 5.68132300  | -0.09931200 | -2.10386200 |
| H | 5.22503800  | 1.63300400  | 1.80452700  |
| H | 6.54498200  | 1.35398700  | -0.28316800 |
| C | 1.81780700  | -1.17370000 | 0.29752100  |
| H | 1.79539300  | -1.68380900 | 1.26928300  |
| H | 1.70543900  | -1.94783400 | -0.47904200 |
| C | -0.90825500 | -1.53891500 | 1.47088200  |



|   |             |             |             |
|---|-------------|-------------|-------------|
| H | -0.78350900 | -0.95426100 | 2.38674300  |
| H | -1.92673600 | -1.93612000 | 1.43251700  |
| H | -0.23301900 | -2.39672200 | 1.49196100  |
| N | -1.51043800 | 0.44461400  | 0.20415200  |
| C | -3.20949700 | 1.92370300  | 0.40897800  |
| C | -2.87782500 | 0.45953500  | 0.67595900  |
| C | -1.35123200 | 1.48177900  | -0.81484300 |
| H | -4.27713800 | 2.12836700  | 0.31312000  |
| H | -2.76989900 | 2.55965100  | 1.19048800  |
| H | -2.95007000 | 0.23386600  | 1.74785200  |
| H | -0.53731800 | 2.17400800  | -0.54003100 |
| H | -1.16216400 | 1.08034400  | -1.82400400 |
| C | -3.91409700 | -0.42203300 | -0.03617300 |
| O | -5.08756300 | -0.34373300 | 0.26892200  |
| O | -3.51548200 | -1.24650600 | -0.99342900 |
| O | -0.85489500 | -1.57009500 | -0.88844000 |
| H | -2.52782500 | -1.31624000 | -1.07376900 |
| H | -0.35953800 | -1.25184600 | -1.65652200 |
| O | -2.58618200 | 2.15455700  | -0.84790800 |

#### H<sub>2</sub>O-44

|   |             |             |             |
|---|-------------|-------------|-------------|
| N | -0.41632100 | 1.09120500  | -0.31295300 |
| H | -0.97352400 | 1.91707100  | -0.51414700 |
| H | 1.70409700  | 0.08678600  | 1.78516800  |
| C | -2.53443000 | 0.01679800  | 0.21845000  |
| C | -3.62905600 | 0.40209300  | 0.99251800  |
| C | -2.76223900 | -0.64531100 | -0.99271400 |
| C | -4.93020200 | 0.12616400  | 0.57226400  |
| H | -3.46061900 | 0.92059400  | 1.93565100  |
| C | -4.05811300 | -0.92205400 | -1.41566600 |
| H | -1.91054400 | -0.94310400 | -1.60340600 |
| C | -5.14700700 | -0.53687600 | -0.63221300 |
| H | -5.77394400 | 0.43174800  | 1.18678200  |
| H | -4.22142200 | -1.44080600 | -2.35769900 |
| H | -6.16037400 | -0.75364100 | -0.96212900 |
| C | -1.13119800 | 0.29185800  | 0.68496900  |
| H | -0.61522000 | -0.66741200 | 0.82382900  |
| H | -1.15728300 | 0.77707400  | 1.67249900  |
| C | 3.96979300  | -0.54788900 | -0.81867900 |
| C | 2.83052700  | -1.42108000 | -1.33747300 |
| C | 1.64643300  | -0.91404400 | -0.50832700 |
| C | 3.31137600  | 0.81314300  | -0.57517800 |
| H | 4.35336400  | -0.95902800 | 0.12478900  |
| H | 4.81317200  | -0.48278300 | -1.51168800 |
| H | 3.00411200  | -2.49343400 | -1.21679700 |
| H | 2.62673800  | -1.21488600 | -2.39443400 |
| H | 0.68638700  | -1.16384800 | -0.98045500 |
| H | 3.52206800  | 1.51280400  | -1.39599500 |
| H | 3.68252500  | 1.27412500  | 0.35525400  |
| N | 1.87559700  | 0.51377300  | -0.51791000 |
| C | 1.66631500  | -1.61972900 | 0.85662900  |
| O | 1.58218400  | -2.82996600 | 0.93853200  |
| O | 1.80732800  | -0.88361600 | 1.95625800  |

|   |            |            |             |
|---|------------|------------|-------------|
| C | 0.94326000 | 1.49986200 | -0.05255200 |
| C | 1.19460400 | 2.83931900 | -0.72368000 |
| H | 1.05779900 | 2.74570700 | -1.80528800 |
| H | 0.49430800 | 3.58404500 | -0.33198600 |
| H | 2.21046200 | 3.19945500 | -0.53578800 |
| H | 1.76705300 | 2.36435700 | 1.56839000  |
| O | 1.09993000 | 1.68568300 | 1.40063600  |

### H<sub>2</sub>O-Product

|   |             |             |             |
|---|-------------|-------------|-------------|
| N | -1.60337700 | -0.61622800 | -0.57064100 |
| H | -1.66746100 | -0.61299700 | -1.57978900 |
| C | 0.81841100  | -0.51931600 | -0.01133400 |
| C | 2.02910400  | -1.21581100 | -0.03974300 |
| C | 0.84338600  | 0.87626200  | 0.00767900  |
| C | 3.24274800  | -0.53261100 | -0.04090300 |
| H | 2.01870900  | -2.30510600 | -0.06453400 |
| C | 2.05596600  | 1.56268300  | 0.00276400  |
| H | -0.09258400 | 1.43241700  | 0.02106600  |
| C | 3.25946900  | 0.86069700  | -0.01958400 |
| H | 4.17650400  | -1.08985600 | -0.06638800 |
| H | 2.05984700  | 2.65021200  | 0.01599400  |
| H | 4.20560000  | 1.39677500  | -0.02562300 |
| C | -0.47831900 | -1.28992000 | 0.04376000  |
| H | -0.75621800 | -1.47460000 | 1.08887600  |
| H | -0.34739300 | -2.26984100 | -0.43041500 |
| C | -2.54518900 | 0.04962900  | 0.14172600  |
| C | -3.64106800 | 0.69801900  | -0.65698700 |
| H | -3.57583700 | 0.50507800  | -1.73100300 |
| H | -4.60602100 | 0.33962700  | -0.28639700 |
| H | -3.60684400 | 1.77877700  | -0.48765300 |
| O | -2.51146300 | 0.12816700  | 1.37201000  |

### H<sub>2</sub>O-TS3-IM1

|   |             |             |             |
|---|-------------|-------------|-------------|
| C | 1.45822800  | 2.10458500  | 0.96018800  |
| C | 2.07179200  | 1.37576500  | -0.23243800 |
| C | 1.08435200  | 0.24790600  | -0.55366900 |
| C | -0.02653700 | 1.92760400  | 0.71950700  |
| H | 1.74420700  | 1.62239200  | 1.90380900  |
| H | 1.74838400  | 3.15720400  | 1.01772100  |
| H | 3.06733700  | 0.97351300  | -0.02976800 |
| H | 2.14841800  | 2.05085500  | -1.09165100 |
| H | 0.75159000  | 0.32014600  | -1.59985900 |
| H | -0.37197200 | 2.56157300  | -0.10816000 |
| H | -0.66235700 | 2.09151800  | 1.59251400  |
| N | -0.14668000 | 0.51475100  | 0.26904000  |
| C | 1.62025500  | -1.17219200 | -0.36981000 |
| O | 2.80255300  | -1.39360100 | -0.17322000 |
| O | 0.73915700  | -2.13320700 | -0.50461600 |
| H | -0.24510500 | -1.77153700 | -0.64974700 |
| C | -1.60463500 | 0.08581300  | -0.56837400 |
| C | -2.69385200 | 0.65664700  | 0.31854400  |
| H | -2.71393400 | 1.75103600  | 0.31813400  |
| H | -3.64872700 | 0.29610800  | -0.07878300 |

|   |             |             |             |
|---|-------------|-------------|-------------|
| H | -2.59366700 | 0.29782600  | 1.34769400  |
| N | -1.49369200 | 0.74652300  | -1.81660200 |
| H | -1.51140300 | 0.08929100  | -2.58695400 |
| H | -2.14654400 | 1.50667200  | -1.96221900 |
| O | -1.55371300 | -1.22985900 | -0.62311500 |
| H | -0.17837500 | -0.10015500 | 1.09784300  |
| O | -1.14517900 | -1.60402400 | 2.11002600  |
| H | -0.62844300 | -2.38262600 | 2.34443700  |
| H | -1.47697500 | -1.76397300 | 1.20163800  |

**H<sub>2</sub>O-TS3-5b-H<sub>2</sub>O**

|   |             |             |             |
|---|-------------|-------------|-------------|
| C | 1.45822800  | 2.10458500  | 0.96018800  |
| C | 2.07179200  | 1.37576500  | -0.23243800 |
| C | 1.08435200  | 0.24790600  | -0.55366900 |
| C | -0.02653700 | 1.92760400  | 0.71950700  |
| H | 1.74420700  | 1.62239200  | 1.90380900  |
| H | 1.74838400  | 3.15720400  | 1.01772100  |
| H | 3.06733700  | 0.97351300  | -0.02976800 |
| H | 2.14841800  | 2.05085500  | -1.09165100 |
| H | 0.75159000  | 0.32014600  | -1.59985900 |
| H | -0.37197200 | 2.56157300  | -0.10816000 |
| H | -0.66235700 | 2.09151800  | 1.59251400  |
| N | -0.14668000 | 0.51475100  | 0.26904000  |
| C | 1.62025500  | -1.17219200 | -0.36981000 |
| O | 2.80255300  | -1.39360100 | -0.17322000 |
| O | 0.73915700  | -2.13320700 | -0.50461600 |
| H | -0.24510500 | -1.77153700 | -0.64974700 |
| C | -1.60463500 | 0.08581300  | -0.56837400 |
| C | -2.69385200 | 0.65664700  | 0.31854400  |
| H | -2.71393400 | 1.75103600  | 0.31813400  |
| H | -3.64872700 | 0.29610800  | -0.07878300 |
| H | -2.59366700 | 0.29782600  | 1.34769400  |
| N | -1.49369200 | 0.74652300  | -1.81660200 |
| H | -1.51140300 | 0.08929100  | -2.58695400 |
| H | -2.14654400 | 1.50667200  | -1.96221900 |
| O | -1.55371300 | -1.22985900 | -0.62311500 |
| H | -0.17837500 | -0.10015500 | 1.09784300  |
| O | -1.14517900 | -1.60402400 | 2.11002600  |
| H | -0.62844300 | -2.38262600 | 2.34443700  |
| H | -1.47697500 | -1.76397300 | 1.20163800  |

**H<sub>2</sub>O-TS-IM1-5a**

|   |             |            |             |
|---|-------------|------------|-------------|
| C | 0.89741400  | 2.62225100 | 0.08688000  |
| C | 1.86695200  | 1.43737300 | 0.10695400  |
| C | 1.05390400  | 0.27150800 | -0.44695800 |
| C | -0.48556400 | 2.00333400 | -0.12378500 |
| H | 0.94320200  | 3.18706800 | 1.02212100  |
| H | 1.12633500  | 3.31881800 | -0.72478000 |
| H | 2.18152400  | 1.19988400 | 1.13109600  |
| H | 2.77183400  | 1.60042600 | -0.48157300 |
| H | 0.97257100  | 0.36112200 | -1.54334400 |
| H | -0.83681400 | 2.14256400 | -1.15415500 |
| H | -1.24283500 | 2.38968700 | 0.56244100  |

|   |             |             |             |
|---|-------------|-------------|-------------|
| N | -0.31277700 | 0.54031500  | 0.10610100  |
| C | 1.74675600  | -1.06894400 | -0.20086800 |
| O | 2.96188900  | -1.10526000 | -0.26595200 |
| O | 1.04602100  | -2.16627100 | -0.01358500 |
| H | 0.04078000  | -2.00221600 | 0.07782200  |
| C | -1.47836000 | -0.33846900 | -0.42202200 |
| C | -2.80076900 | 0.33829200  | -0.11034700 |
| H | -2.97318400 | 1.23016700  | -0.71902000 |
| H | -3.59028600 | -0.38930000 | -0.32217000 |
| H | -2.86269000 | 0.60193800  | 0.94976000  |
| N | -1.32415100 | -0.51135100 | -1.83340200 |
| H | -0.76583100 | -1.33158200 | -2.05429000 |
| H | -2.22533300 | -0.62276300 | -2.28628700 |
| O | -1.37547000 | -1.52641400 | 0.29944700  |
| H | -0.36755700 | 0.25792100  | 1.28375000  |
| O | -0.78888100 | -0.42129200 | 2.32526900  |
| H | -0.07678200 | -0.80891600 | 2.84685200  |
| H | -1.18691900 | -1.17574300 | 1.40233500  |

#### H<sub>2</sub>O-TS-5a-6a

|   |             |             |             |
|---|-------------|-------------|-------------|
| C | 1.36480000  | 1.93222500  | 0.61748900  |
| C | 1.81722800  | 1.29353100  | -0.69106600 |
| C | 0.91297900  | 0.06654400  | -0.77577700 |
| C | -0.15133700 | 1.74232800  | 0.60942700  |
| H | 1.80735100  | 1.39049700  | 1.46363900  |
| H | 1.64947800  | 2.98384300  | 0.71164700  |
| H | 2.87258200  | 1.01418800  | -0.70786500 |
| H | 1.61090300  | 1.95683700  | -1.54006900 |
| H | 0.82030600  | -0.28108500 | -1.81333500 |
| H | -0.67666800 | 2.63162700  | 0.23451200  |
| H | -0.53770000 | 1.51818700  | 1.61424800  |
| N | -0.36299700 | 0.61191600  | -0.30609300 |
| C | 1.50044100  | -1.09869900 | 0.05377600  |
| O | 2.64226600  | -1.44843300 | -0.21445600 |
| O | 0.77087300  | -1.64694600 | 0.97383300  |
| H | -0.34275500 | -1.36946200 | 1.11000500  |
| C | -1.54254600 | -0.06028000 | -0.35320300 |
| C | -2.79541300 | 0.73208700  | -0.12218100 |
| H | -2.93174800 | 1.42710400  | -0.95838600 |
| H | -3.65658300 | 0.06151500  | -0.07143500 |
| H | -2.75425200 | 1.30813200  | 0.80432900  |
| N | -1.65796200 | -1.02035900 | -1.33690300 |
| H | -0.86779200 | -1.64684200 | -1.43436100 |
| H | -2.51620600 | -1.55211300 | -1.25900300 |
| O | -1.56411000 | -1.10779300 | 1.16004800  |
| H | -1.75935400 | -0.60436300 | 1.96086700  |

#### H<sub>2</sub>O-TS-6a-6c

|   |             |             |             |
|---|-------------|-------------|-------------|
| C | -0.94351100 | 2.13977600  | -0.35981600 |
| C | -1.47253100 | 1.30750500  | 0.80303000  |
| C | -0.71100400 | -0.00352700 | 0.68087200  |
| C | 0.54252000  | 1.82247700  | -0.35118800 |
| H | -1.39348400 | 1.79967400  | -1.30155200 |

|   |             |             |             |
|---|-------------|-------------|-------------|
| H | -1.13725900 | 3.21038500  | -0.25401100 |
| H | -2.55167000 | 1.14351200  | 0.76427200  |
| H | -1.22396100 | 1.78954000  | 1.75655100  |
| H | -0.48151400 | -0.44809200 | 1.66130100  |
| H | 1.07591700  | 2.44174200  | 0.38501700  |
| H | 1.02079300  | 1.95080100  | -1.32723700 |
| N | 0.56997400  | 0.41020400  | 0.06103700  |
| C | -1.42841500 | -1.09603700 | -0.14143800 |
| O | -2.55964300 | -0.90970300 | -0.58536700 |
| O | -0.75939700 | -2.19431700 | -0.27506800 |
| C | 1.66646400  | -0.35886600 | 0.07943400  |
| C | 2.97691100  | 0.25891500  | -0.27280700 |
| H | 3.14064700  | 1.18788900  | 0.28187800  |
| H | 3.79368400  | -0.43374200 | -0.06171500 |
| H | 3.00254700  | 0.50177200  | -1.34115200 |
| N | 1.53442600  | -1.62597800 | 0.39017100  |
| H | 0.40077200  | -2.05845200 | 0.14149700  |
| H | 2.39244500  | -2.16391300 | 0.39166900  |

#### H<sub>2</sub>O-TS-IM2

|   |             |             |             |
|---|-------------|-------------|-------------|
| C | 0.73460000  | 2.14905100  | 0.40490100  |
| C | 1.28540000  | 1.41209100  | -0.81040800 |
| C | 0.67376600  | 0.01944300  | -0.65759000 |
| C | -0.70640800 | 1.66731300  | 0.46194200  |
| H | 1.27299800  | 1.84037300  | 1.31198300  |
| H | 0.80624600  | 3.23688300  | 0.32461300  |
| H | 2.37619100  | 1.37784000  | -0.86069100 |
| H | 0.91059300  | 1.86822600  | -1.73431300 |
| H | 0.51083500  | -0.48134500 | -1.62254200 |
| H | -1.34311800 | 2.26165000  | -0.21097800 |
| H | -1.13424300 | 1.71322900  | 1.46900900  |
| N | -0.61153300 | 0.27809500  | -0.01157800 |
| C | 1.58956100  | -0.91044700 | 0.13431000  |
| O | 2.77501500  | -1.00515800 | -0.10106900 |
| O | 1.03700800  | -1.64442500 | 1.10148700  |
| C | -1.69233200 | -0.54422800 | -0.22066300 |
| C | -3.01831800 | -0.00692100 | 0.22837500  |
| H | -3.26116300 | 0.92771600  | -0.28953800 |
| H | -3.80870400 | -0.73312600 | 0.02760200  |
| H | -3.01056300 | 0.20850600  | 1.30268900  |
| N | -1.48989000 | -1.71010500 | -0.73932600 |
| H | 0.07266200  | -1.51151500 | 1.10996700  |
| H | -2.37557000 | -2.20550400 | -0.82001700 |

#### H<sub>2</sub>O-TS-6c-6d

|   |             |            |             |
|---|-------------|------------|-------------|
| C | 0.85738800  | 2.01518500 | 0.69042400  |
| C | 1.21130400  | 1.44798700 | -0.67872100 |
| C | 0.57532100  | 0.05347700 | -0.63660400 |
| C | -0.57459600 | 1.54268900 | 0.86303900  |
| H | 1.50504300  | 1.58940100 | 1.46926600  |
| H | 0.94340800  | 3.10426400 | 0.74191500  |
| H | 2.28320300  | 1.40890100 | -0.89329300 |

|   |             |             |             |
|---|-------------|-------------|-------------|
| H | 0.72375300  | 2.03600100  | -1.46586000 |
| H | 0.24334900  | -0.27023700 | -1.63146200 |
| H | -1.25745500 | 2.17399300  | 0.27574300  |
| H | -0.91706600 | 1.52501700  | 1.90318900  |
| N | -0.55973500 | 0.16405700  | 0.30881600  |
| C | 1.56549100  | -0.99367200 | -0.13666900 |
| O | 2.56615500  | -1.30222200 | -0.75053700 |
| O | 1.25349900  | -1.54017300 | 1.03354000  |
| C | -1.82820200 | -0.27005400 | -0.23040500 |
| C | -2.37918100 | -1.48885100 | 0.43093000  |
| H | -2.47935300 | -1.31060500 | 1.50842300  |
| H | -3.34795400 | -1.78086900 | 0.01759300  |
| H | -1.67510200 | -2.32304300 | 0.31416700  |
| N | -2.34254700 | 0.38913300  | -1.18624500 |
| H | 0.40302500  | -1.09867300 | 1.29486600  |
| H | -3.23125900 | -0.02787300 | -1.46853300 |

### H<sub>2</sub>O-TS-6a-7

|   |             |             |             |
|---|-------------|-------------|-------------|
| N | -0.40800800 | 0.84337800  | 0.04752900  |
| H | -0.16756100 | -0.16505000 | 0.03652100  |
| H | -0.56851000 | 1.14521800  | 1.00860200  |
| C | -2.80441000 | 0.34519300  | -0.27256500 |
| C | -2.85895000 | -1.04581100 | -0.41161800 |
| C | -3.85917600 | 1.00878900  | 0.35486900  |
| C | -3.95097300 | -1.75945800 | 0.07142200  |
| H | -2.03407000 | -1.56734300 | -0.89877300 |
| C | -4.95627700 | 0.29543400  | 0.83615600  |
| H | -3.82242600 | 2.09196700  | 0.46371400  |
| C | -5.00304800 | -1.08917000 | 0.69624200  |
| H | -3.98522400 | -2.84036800 | -0.04265200 |
| H | -5.77421000 | 0.82300500  | 1.32124400  |
| H | -5.85829600 | -1.64665100 | 1.07064900  |
| C | -1.60290200 | 1.09977100  | -0.77278700 |
| H | -1.80199800 | 2.17798900  | -0.78453300 |
| H | -1.36345200 | 0.78973600  | -1.79826300 |
| C | 3.14014000  | -0.34289600 | 2.01492400  |
| C | 3.88897900  | -0.74159600 | 0.74943800  |
| C | 2.84152200  | -0.51668400 | -0.33927000 |
| C | 2.39267000  | 0.91091300  | 1.58344000  |
| H | 2.42305300  | -1.12993300 | 2.28725100  |
| H | 3.78967600  | -0.16416700 | 2.87634900  |
| H | 4.24856400  | -1.77278400 | 0.74984200  |
| H | 4.74402900  | -0.07187200 | 0.58989300  |
| H | 3.31894300  | -0.29024100 | -1.30405800 |
| H | 3.00409600  | 1.81362300  | 1.73353000  |
| H | 1.45493700  | 1.04513200  | 2.13871800  |
| N | 2.15198800  | 0.68499200  | 0.15324300  |
| C | 1.95433800  | -1.76562100 | -0.57985500 |
| O | 2.57183800  | -2.83110700 | -0.78739000 |
| O | 0.69880600  | -1.60837200 | -0.60234200 |
| C | 1.27131300  | 1.44039100  | -0.56872200 |
| C | 1.18481700  | 2.90131200  | -0.22064000 |

|   |            |            |             |
|---|------------|------------|-------------|
| H | 2.12877700 | 3.38317800 | -0.49868200 |
| H | 0.37184400 | 3.38528000 | -0.76987000 |
| H | 1.01872200 | 3.05804600 | 0.84739400  |
| N | 1.26696400 | 1.18443400 | -1.92972900 |
| H | 1.12012600 | 0.21062200 | -2.17911100 |
| H | 0.68297800 | 1.80742500 | -2.47342700 |

**H<sub>2</sub>O-TS-6a-8**

|   |             |             |             |
|---|-------------|-------------|-------------|
| C | -2.55151500 | 0.13548100  | 2.49569400  |
| C | -2.81882300 | -1.07790000 | 1.61480700  |
| C | -1.81027700 | -0.88907000 | 0.50358100  |
| C | -2.27950900 | 1.26334900  | 1.50103400  |
| H | -3.37655000 | 0.38010400  | 3.17068300  |
| H | -1.66124600 | -0.04462600 | 3.11217900  |
| H | -3.83000900 | -1.05661100 | 1.18906000  |
| H | -2.68496100 | -2.03184400 | 2.13436400  |
| H | -0.80088600 | -1.09912400 | 0.90715700  |
| H | -1.48657000 | 1.93345800  | 1.85757800  |
| H | -3.17659800 | 1.87196400  | 1.32598100  |
| N | -1.90928500 | 0.56922900  | 0.24918200  |
| C | -1.94859800 | -1.78748300 | -0.73943600 |
| O | -3.01272400 | -2.41052300 | -0.91231500 |
| O | -0.92597400 | -1.79882200 | -1.49094200 |
| C | -1.48817700 | 1.24854000  | -0.86140300 |
| C | -1.47383500 | 2.74739200  | -0.75493400 |
| H | -1.04092700 | 3.18152600  | -1.66001500 |
| H | -2.50127600 | 3.11471700  | -0.65999900 |
| H | -0.90010800 | 3.09822800  | 0.10494900  |
| N | -1.89339300 | 0.80767600  | -2.11155800 |
| H | -1.73024700 | -0.17955500 | -2.30185100 |
| H | -1.56104900 | 1.39018400  | -2.87114100 |
| N | 0.39739300  | 0.84259000  | -0.92516800 |
| H | 0.31976700  | -0.16298000 | -1.14211300 |
| H | 0.82827400  | 1.29771700  | -1.73084000 |
| C | 2.52017800  | 0.38058700  | 0.27163900  |
| C | 2.57701300  | -1.01706900 | 0.28318900  |
| C | 3.70893000  | 1.10854500  | 0.21873400  |
| C | 3.80192800  | -1.67442100 | 0.24076400  |
| H | 1.65324400  | -1.59628100 | 0.32468500  |
| C | 4.93864400  | 0.45193100  | 0.18077800  |
| H | 3.67112400  | 2.19690300  | 0.20934400  |
| C | 4.98653900  | -0.93934700 | 0.19081600  |
| H | 3.83449400  | -2.76112600 | 0.25162700  |
| H | 5.85881200  | 1.03015400  | 0.14257600  |
| H | 5.94492900  | -1.45213000 | 0.16059500  |
| C | 1.18555900  | 1.07503900  | 0.29637700  |
| H | 1.31530300  | 2.15609200  | 0.42106900  |
| H | 0.58272600  | 0.71808200  | 1.14313800  |

**H<sub>2</sub>O-TS-6a-11**

|   |             |            |             |
|---|-------------|------------|-------------|
| C | -1.43024200 | 1.25573700 | -0.77841900 |
| N | -1.64676600 | 2.13247800 | 0.27958500  |
| H | -2.23563200 | 2.92160200 | 0.03825800  |

|   |             |             |             |
|---|-------------|-------------|-------------|
| N | 0.46117900  | 1.01416000  | -0.74812500 |
| H | 0.78010400  | 0.66258100  | -1.65212500 |
| H | 0.86944400  | 1.94687200  | -0.60877600 |
| C | 2.32448700  | -0.31928900 | 0.17430300  |
| C | 2.62506400  | -1.56561700 | -0.37976000 |
| C | 3.36993000  | 0.53380200  | 0.53991200  |
| C | 3.94946800  | -1.95612000 | -0.56620500 |
| H | 1.81198900  | -2.23534800 | -0.66142500 |
| C | 4.69359100  | 0.14584000  | 0.35563400  |
| H | 3.14014200  | 1.50728900  | 0.97347200  |
| C | 4.98548400  | -1.10085000 | -0.19793000 |
| H | 4.17147100  | -2.93029800 | -0.99543700 |
| H | 5.50009600  | 0.81429800  | 0.64748400  |
| H | 6.01978300  | -1.40525100 | -0.33912600 |
| C | 0.89454200  | 0.11096000  | 0.33210400  |
| H | 0.72552800  | 0.63645300  | 1.28019500  |
| H | 0.22998400  | -0.76271300 | 0.32202800  |
| O | 0.86913900  | 3.60255000  | 0.48834800  |
| H | 1.30753100  | 3.75371200  | 1.33284900  |
| H | -0.02792500 | 3.28071900  | 0.70028200  |
| C | -1.51983000 | 1.91231300  | -2.13090800 |
| H | -0.95834300 | 2.85205100  | -2.13503100 |
| H | -1.14386800 | 1.27605900  | -2.93473100 |
| H | -2.57455400 | 2.13129100  | -2.33832000 |
| N | -1.91963100 | -0.01290000 | -0.64848500 |
| C | -2.32016900 | -2.27503100 | -1.09873000 |
| C | -3.39714400 | -1.76224500 | -0.14968900 |
| C | -2.79458600 | -0.49768700 | 0.45100700  |
| C | -1.80380900 | -0.99456100 | -1.73151600 |
| H | -1.52003600 | -2.76221900 | -0.52718200 |
| H | -2.69489900 | -2.98282000 | -1.84386200 |
| H | -3.66414400 | -2.48220800 | 0.62783400  |
| H | -4.30255800 | -1.50494600 | -0.71542700 |
| H | -3.56371000 | 0.26324100  | 0.64426000  |
| H | -2.42272900 | -0.69911900 | -2.59307100 |
| H | -0.76387200 | -1.07872000 | -2.07808000 |
| C | -2.00753600 | -0.71464600 | 1.77237100  |
| O | -1.65959800 | -1.87502700 | 2.07613800  |
| O | -1.77120200 | 0.34061300  | 2.42839800  |
| H | -1.86949800 | 1.68059000  | 1.17897100  |

#### H<sub>2</sub>O-TS-11-12

|   |             |             |             |
|---|-------------|-------------|-------------|
| C | -0.92793000 | 0.97391500  | -0.92081300 |
| N | -1.18553100 | 2.04003100  | 0.03838700  |
| H | -1.95827600 | 2.61172400  | -0.29970700 |
| N | 0.58689000  | 0.68309500  | -0.77493900 |
| H | 0.92600200  | 0.19944000  | -1.61020600 |
| H | 1.04386000  | 1.67176100  | -0.70496800 |
| C | 2.45354400  | -0.41426000 | 0.37016000  |
| C | 2.86388500  | -1.59841500 | -0.24833400 |
| C | 3.41621900  | 0.46050000  | 0.87911700  |
| C | 4.21808000  | -1.90168800 | -0.36103400 |
| H | 2.11613700  | -2.28961100 | -0.63781500 |



|   |             |             |             |
|---|-------------|-------------|-------------|
| C | 4.77056200  | 0.15800800  | 0.76881400  |
| H | 3.09986000  | 1.38051100  | 1.36893600  |
| C | 5.17254200  | -1.02269200 | 0.14700000  |
| H | 4.52801700  | -2.82689700 | -0.84050300 |
| H | 5.51243800  | 0.84345800  | 1.17103700  |
| H | 6.23019600  | -1.26037200 | 0.06309900  |
| C | 0.99536000  | -0.07456500 | 0.44914800  |
| H | 0.77126600  | 0.56982100  | 1.30577400  |
| H | 0.35961800  | -0.96292900 | 0.52055800  |
| O | 1.02775900  | 3.16318300  | -0.25666100 |
| H | 1.54403700  | 3.39067000  | 0.52290400  |
| H | -0.21914700 | 2.71390400  | 0.03959900  |
| C | -1.12489700 | 1.45407400  | -2.35149500 |
| H | -0.57863600 | 2.38795600  | -2.52108100 |
| H | -0.79117200 | 0.71806400  | -3.08982400 |
| H | -2.19330200 | 1.63753600  | -2.51696000 |
| N | -1.64583700 | -0.21524000 | -0.57073900 |
| C | -2.60701500 | -2.31561600 | -0.81147100 |
| C | -3.70080500 | -1.36683000 | -0.33524900 |
| C | -2.93502700 | -0.14008300 | 0.15176800  |
| C | -1.64733400 | -1.35480500 | -1.48738300 |
| H | -2.11407400 | -2.79912900 | 0.04364200  |
| H | -2.97030200 | -3.09587400 | -1.48642000 |
| H | -4.33531900 | -1.77948100 | 0.45226900  |
| H | -4.33842700 | -1.08552700 | -1.18300000 |
| H | -3.49020300 | 0.77858500  | -0.10305400 |
| H | -2.02461400 | -1.08885500 | -2.49075500 |
| H | -0.63628200 | -1.77127300 | -1.60836900 |
| C | -2.68980200 | -0.11272700 | 1.67436400  |
| O | -3.21896700 | -0.93140600 | 2.42374900  |
| O | -1.90651800 | 0.83611900  | 2.08829900  |
| H | -1.53283000 | 1.48924600  | 1.16523900  |

#### H<sub>2</sub>O-TS-6b-18

|   |             |             |             |
|---|-------------|-------------|-------------|
| N | 0.43340200  | -0.77397400 | -0.74970200 |
| H | 0.95093900  | -1.12171000 | -1.55795600 |
| H | 0.19779300  | 0.22647600  | -0.87419300 |
| C | 2.58974400  | -0.27282100 | 0.34219500  |
| C | 3.75036200  | -1.04626700 | 0.31664100  |
| C | 2.69094300  | 1.11763400  | 0.21610100  |
| C | 4.99870800  | -0.44257700 | 0.16874900  |
| H | 3.67613300  | -2.12858700 | 0.41449400  |
| C | 3.93543300  | 1.72040800  | 0.06584500  |
| H | 1.78237000  | 1.72161000  | 0.23075400  |
| C | 5.09248200  | 0.94097300  | 0.04219100  |
| H | 5.89727000  | -1.05494500 | 0.15185900  |
| H | 4.00579900  | 2.80142900  | -0.03005100 |
| H | 6.06533500  | 1.41286000  | -0.07440900 |
| C | 1.23379400  | -0.91065200 | 0.47583400  |
| H | 0.66435400  | -0.42133000 | 1.27689300  |
| H | 1.33038600  | -1.97525100 | 0.72404900  |
| C | -2.77587000 | 0.38184100  | 2.10902200  |
| C | -3.64942000 | 0.80156100  | 0.93391900  |

|   |             |             |             |
|---|-------------|-------------|-------------|
| C | -2.75396600 | 0.51799900  | -0.27750800 |
| C | -2.15035500 | -0.90836000 | 1.60683500  |
| H | -1.99302800 | 1.13209600  | 2.28430300  |
| H | -3.33007700 | 0.24013100  | 3.04100700  |
| H | -3.96732600 | 1.84679800  | 0.96367500  |
| H | -4.54651500 | 0.17020700  | 0.89024300  |
| H | -3.36682000 | 0.27702300  | -1.15599400 |
| H | -2.81474500 | -1.76827400 | 1.78796900  |
| H | -1.18531300 | -1.11802800 | 2.08532600  |
| N | -2.00938300 | -0.67150700 | 0.16407200  |
| C | -1.91581900 | 1.76832100  | -0.64589700 |
| O | -2.58953500 | 2.72091700  | -1.09721000 |
| O | -0.66642500 | 1.74723600  | -0.46774400 |
| C | -1.32088300 | -1.50748700 | -0.66077000 |
| C | -1.63453800 | -1.43219900 | -2.13081400 |
| H | -1.51473600 | -0.42102800 | -2.52771700 |
| H | -0.98069400 | -2.10485000 | -2.69304300 |
| H | -2.67033700 | -1.75201600 | -2.28770300 |
| N | -1.16176700 | -2.80553000 | -0.20104300 |
| H | -0.57286500 | -3.39125700 | -0.78047300 |
| H | -0.95970200 | -2.92974500 | 0.78325300  |

#### H<sub>2</sub>O-TS-8-25

|   |             |             |             |
|---|-------------|-------------|-------------|
| C | 3.92942200  | -0.31749700 | -0.98438100 |
| C | 2.81921500  | -1.23904500 | -1.47238700 |
| C | 1.64485400  | -0.87327200 | -0.57485100 |
| C | 3.19616700  | 0.98593500  | -0.69275600 |
| H | 4.36300600  | -0.72079600 | -0.06057000 |
| H | 4.73792200  | -0.19118900 | -1.71065800 |
| H | 3.07158800  | -2.30088500 | -1.41527000 |
| H | 2.55147100  | -1.00129700 | -2.50956200 |
| H | 0.68979900  | -1.08963400 | -1.08016600 |
| H | 3.22823600  | 1.66959100  | -1.55562600 |
| H | 3.64213700  | 1.51896600  | 0.15954700  |
| N | 1.80997400  | 0.57580400  | -0.41971200 |
| C | 1.62186800  | -1.69392300 | 0.72567600  |
| O | 2.51349300  | -2.44036700 | 1.08084900  |
| O | 0.51130700  | -1.57510300 | 1.44874300  |
| C | 1.02131600  | 1.38941900  | 0.47833900  |
| C | 1.03678700  | 2.83782600  | -0.00799300 |
| H | 0.35203600  | 3.43215700  | 0.60869900  |
| H | 2.03720400  | 3.26441800  | 0.10975100  |
| H | 0.74455200  | 2.92256000  | -1.06040400 |
| N | 1.53540200  | 1.38167500  | 1.86749900  |
| H | 2.32108300  | 0.74341100  | 1.95519200  |
| H | 0.83628100  | 1.07793900  | 2.53900200  |
| N | -0.34868000 | 0.82822400  | 0.51501600  |
| H | -0.02462400 | -0.79651400 | 1.10418800  |
| H | -0.84952600 | 1.29407300  | 1.27325900  |
| C | -2.49833000 | 0.33567700  | -0.50368300 |
| C | -2.65008100 | -1.04814900 | -0.63354500 |
| C | -3.60403000 | 1.10399300  | -0.13434900 |
| C | -3.88090700 | -1.65170800 | -0.39441700 |

|   |             |             |             |
|---|-------------|-------------|-------------|
| H | -1.79773100 | -1.65803500 | -0.93291600 |
| C | -4.83887200 | 0.50389900  | 0.10568100  |
| H | -3.49451200 | 2.18384300  | -0.03698900 |
| C | -4.97855300 | -0.87591700 | -0.02265600 |
| H | -3.98606300 | -2.72866700 | -0.50244500 |
| H | -5.69238900 | 1.11487100  | 0.39004200  |
| H | -5.94154200 | -1.34658900 | 0.16095500  |
| C | -1.15975200 | 0.98695300  | -0.70698700 |
| H | -1.30137600 | 2.04761800  | -0.96217500 |
| H | -0.61743900 | 0.52285500  | -1.54037100 |

**S-IM1**

|   |             |             |             |
|---|-------------|-------------|-------------|
| C | 0.85091000  | 2.28367400  | 1.09722500  |
| C | 1.36792100  | 1.97868500  | -0.30900000 |
| C | 0.82602500  | 0.58613900  | -0.64221000 |
| C | -0.47353400 | 1.54867100  | 1.12784100  |
| H | 1.52574900  | 1.87362000  | 1.86007200  |
| H | 0.73745600  | 3.35335200  | 1.29330300  |
| H | 2.45856400  | 1.98095900  | -0.38083600 |
| H | 0.97890300  | 2.71172700  | -1.02438000 |
| H | 0.22468300  | 0.60881500  | -1.56105000 |
| H | -1.22185100 | 2.05043900  | 0.50185400  |
| H | -0.89106800 | 1.35175000  | 2.12032400  |
| N | -0.14991800 | 0.25598500  | 0.46616800  |
| C | 1.87309900  | -0.53309600 | -0.80552500 |
| O | 3.05325700  | -0.24304800 | -0.93632900 |
| O | 1.38590000  | -1.72930600 | -0.82867400 |
| H | 0.20910500  | -1.78836800 | -0.66590400 |
| C | -1.41588700 | -0.60131200 | -0.00094300 |
| N | -2.09019200 | 0.12531700  | -1.02488400 |
| H | -2.06650900 | -0.43258200 | -1.87257200 |
| O | -0.95764100 | -1.80431800 | -0.35455100 |
| H | 0.29247600  | -0.36325000 | 1.16971600  |
| O | 0.10486400  | -1.95370600 | 2.24737000  |
| H | 0.88280100  | -2.47169800 | 2.47904000  |
| H | -0.27527500 | -2.37817500 | 1.45524100  |
| H | -2.02219000 | -0.60793300 | 0.92819400  |
| C | -3.43781600 | 0.58717900  | -0.71674400 |
| H | -3.41347700 | 1.31428700  | 0.10259600  |
| H | -3.85141900 | 1.09752500  | -1.59032900 |
| H | -4.12252300 | -0.22618500 | -0.43064800 |

**S-5a**

|   |             |             |             |
|---|-------------|-------------|-------------|
| C | -2.13600800 | -1.57931900 | 0.17670100  |
| C | -2.05539400 | -0.70386500 | -1.07403800 |
| C | -0.82832100 | 0.16395700  | -0.78396500 |
| C | -0.67216900 | -1.81405000 | 0.57198400  |
| H | -2.65808700 | -1.03581900 | 0.97532800  |
| H | -2.67990600 | -2.51371300 | 0.01125400  |
| H | -2.95374800 | -0.10808500 | -1.25303100 |
| H | -1.84959700 | -1.30914200 | -1.96414200 |
| H | -0.39944700 | 0.56842600  | -1.71136000 |
| H | -0.31197500 | -2.81690300 | 0.29443400  |

|   |             |             |             |
|---|-------------|-------------|-------------|
| H | -0.54099800 | -1.70685700 | 1.66238700  |
| N | 0.06354500  | -0.80063200 | -0.17868700 |
| C | -1.24000600 | 1.37211300  | 0.07234100  |
| O | -2.11168800 | 2.12788900  | -0.29711400 |
| O | -0.61739100 | 1.56851700  | 1.23412700  |
| H | 0.12491200  | 0.93936800  | 1.39910000  |
| C | 1.43557400  | -0.59759500 | 0.09571500  |
| N | 2.06761100  | 0.22739600  | -0.86994200 |
| H | 1.68302400  | 1.16904600  | -0.84616500 |
| O | 1.62767300  | -0.00140000 | 1.43179800  |
| H | 1.68200800  | -0.69096400 | 2.10486000  |
| H | 1.94376500  | -1.57563700 | 0.12085200  |
| C | 3.51899000  | 0.27538500  | -0.75386900 |
| H | 3.92445000  | -0.73288500 | -0.89748000 |
| H | 3.91981800  | 0.90838600  | -1.54988400 |
| H | 3.87293400  | 0.65762700  | 0.21456300  |

### S-6a

|   |             |             |             |
|---|-------------|-------------|-------------|
| C | -2.56955800 | -0.79029000 | 0.72890800  |
| C | -2.45717500 | -0.33242400 | -0.72257000 |
| C | -0.97920700 | -0.01896400 | -0.89189300 |
| C | -1.32676600 | -1.64469600 | 0.91626600  |
| H | -2.53247600 | 0.08231200  | 1.39090500  |
| H | -3.48549200 | -1.34919400 | 0.93981700  |
| H | -3.06350700 | 0.55101900  | -0.93512800 |
| H | -2.75292200 | -1.14069700 | -1.40461200 |
| H | -0.60444600 | -0.23184000 | -1.90332100 |
| H | -1.48680900 | -2.67303000 | 0.56281800  |
| H | -0.95796400 | -1.67405700 | 1.94598300  |
| N | -0.33677000 | -0.98106200 | 0.04287200  |
| C | -0.55798700 | 1.43161500  | -0.51274200 |
| O | -1.39187700 | 2.17079800  | 0.01482000  |
| O | 0.66308500  | 1.68493400  | -0.77318600 |
| H | 1.49241600  | 1.67765600  | 0.87046200  |
| C | 0.94156800  | -1.28403200 | 0.07715200  |
| N | 1.87001500  | -0.69866600 | -0.64434900 |
| H | 1.59266700  | 0.23466800  | -1.02002000 |
| O | 1.88368000  | 1.35033700  | 1.70654400  |
| H | 1.69093500  | 2.03053500  | 2.35814000  |
| H | 1.23785500  | -2.09505700 | 0.74502100  |
| C | 3.27832700  | -1.02330400 | -0.51105700 |
| H | 3.39402300  | -1.96188800 | 0.03774600  |
| H | 3.73004400  | -1.13994800 | -1.49955700 |
| H | 3.79863900  | -0.22835900 | 0.03226800  |

### S-6b

|   |            |             |             |
|---|------------|-------------|-------------|
| C | 1.54137800 | 2.24732200  | 0.11835200  |
| C | 2.21346700 | 0.87974200  | 0.14935200  |
| C | 1.30844600 | -0.01049600 | -0.70621600 |
| C | 0.06434800 | 1.89540000  | 0.21059900  |
| H | 1.85802400 | 2.90421400  | 0.93329600  |
| H | 1.74642900 | 2.75794600  | -0.83163000 |
| H | 2.22641200 | 0.49337300  | 1.17866900  |

|   |             |             |             |
|---|-------------|-------------|-------------|
| H | 3.24168600  | 0.87681400  | -0.21856300 |
| H | 1.61311200  | 0.00488100  | -1.76111300 |
| H | -0.60119700 | 2.64923000  | -0.22774600 |
| H | -0.24530500 | 1.68607600  | 1.24657100  |
| N | -0.00869300 | 0.64837100  | -0.56546800 |
| C | 1.32341700  | -1.47819900 | -0.19624900 |
| O | 2.38772100  | -2.06935200 | -0.42509100 |
| O | 0.29216600  | -1.88717600 | 0.40507100  |
| H | -0.62278500 | -0.97011400 | 1.61128500  |
| C | -1.11867500 | 0.01206600  | -0.83429700 |
| O | -1.15959600 | -0.36129000 | 2.17118400  |
| H | -1.12020400 | -0.72324300 | 3.06065700  |
| N | -2.32313800 | 0.42569900  | -0.47620100 |
| H | -1.05357600 | -0.90241500 | -1.41930900 |
| H | -2.37031500 | 1.12152200  | 0.26099100  |
| C | -3.51139900 | -0.39059300 | -0.67020400 |
| H | -4.35485300 | 0.24008100  | -0.95982700 |
| H | -3.32630500 | -1.11301900 | -1.46788800 |
| H | -3.75651700 | -0.93273300 | 0.24896400  |

#### S-6c

|   |             |             |             |
|---|-------------|-------------|-------------|
| C | 2.23989700  | -1.29289000 | -0.31467500 |
| C | 2.02863100  | -0.40518400 | 0.90907100  |
| C | 0.64945700  | 0.19785900  | 0.67660500  |
| C | 0.86622600  | -1.91239200 | -0.52379700 |
| H | 2.51286500  | -0.67629400 | -1.18043200 |
| H | 3.01991100  | -2.04640700 | -0.17396800 |
| H | 2.79216100  | 0.36762100  | 1.02312400  |
| H | 2.00665300  | -1.01530800 | 1.82083300  |
| H | 0.09167300  | 0.36370800  | 1.61195100  |
| H | 0.72858000  | -2.79841100 | 0.11580500  |
| H | 0.67178200  | -2.20096100 | -1.56276100 |
| N | -0.03935900 | -0.83657300 | -0.10785800 |
| C | 0.68579500  | 1.53615600  | -0.07400000 |
| O | 1.71449800  | 2.09268900  | -0.38846800 |
| O | -0.50321100 | 2.06150800  | -0.33999700 |
| C | -1.38630000 | -0.93625100 | -0.16729900 |
| N | -2.17094000 | 0.00888300  | 0.20744300  |
| H | -1.24497800 | 1.45250800  | -0.04518400 |
| H | -1.75325800 | -1.89017100 | -0.57812900 |
| C | -3.59676900 | -0.21929800 | 0.12389700  |
| H | -3.84743200 | -1.21602100 | -0.27234000 |
| H | -4.05494900 | -0.12187200 | 1.11520200  |
| H | -4.06283500 | 0.53386200  | -0.52228700 |

#### S-6c-no-Hbond

|   |             |             |             |
|---|-------------|-------------|-------------|
| C | -1.93622100 | -1.64489800 | 0.18065800  |
| C | -1.81154800 | -0.67504900 | -0.99159700 |
| C | -0.58644100 | 0.17019400  | -0.61944300 |
| C | -0.48608700 | -1.99205500 | 0.47691800  |
| H | -2.39132900 | -1.14480300 | 1.04678600  |
| H | -2.53915600 | -2.52747500 | -0.05040400 |
| H | -2.69804900 | -0.05829100 | -1.16272200 |

|   |             |             |             |
|---|-------------|-------------|-------------|
| H | -1.59969700 | -1.22654100 | -1.91563500 |
| H | -0.00402600 | 0.48154700  | -1.49643900 |
| H | -0.12133200 | -2.77225400 | -0.21011000 |
| H | -0.31614800 | -2.33331100 | 1.50435100  |
| N | 0.20874000  | -0.71908400 | 0.22998900  |
| C | -0.99397500 | 1.45654100  | 0.09231600  |
| O | -1.63165100 | 2.31999800  | -0.46126000 |
| O | -0.63015100 | 1.56368300  | 1.37355300  |
| C | 1.58625300  | -0.67086500 | 0.17887800  |
| N | 2.22219600  | 0.30606300  | -0.32699100 |
| H | -0.12643800 | 0.75992900  | 1.60422800  |
| C | 3.66478100  | 0.25627600  | -0.27841200 |
| H | 4.05898600  | -0.66618200 | 0.18127500  |
| H | 4.07440400  | 0.33805100  | -1.29205200 |
| H | 4.04787000  | 1.11433300  | 0.28682500  |
| H | 2.07219500  | -1.54416900 | 0.64866100  |

**S-6d**

|   |             |             |             |
|---|-------------|-------------|-------------|
| C | 1.41466300  | 1.65717900  | 1.11323200  |
| C | 1.95937200  | 1.47521800  | -0.30200900 |
| C | 1.10702200  | 0.31886700  | -0.83294700 |
| C | -0.08863200 | 1.44069500  | 0.95544300  |
| H | 1.83851400  | 0.89349500  | 1.77954700  |
| H | 1.64969000  | 2.63500600  | 1.54265900  |
| H | 3.02914600  | 1.25527500  | -0.34590400 |
| H | 1.76287200  | 2.36822200  | -0.90781700 |
| H | 1.02873900  | 0.33030500  | -1.92826100 |
| H | -0.63390800 | 2.37199500  | 0.74365900  |
| H | -0.54819500 | 0.98080500  | 1.83773800  |
| N | -0.18238600 | 0.55803100  | -0.21269100 |
| C | 1.74234300  | -1.02552100 | -0.46549600 |
| O | 2.80275700  | -1.34803600 | -0.95397100 |
| O | 1.11599100  | -1.80926300 | 0.40306700  |
| C | -1.36461100 | 0.22918100  | -0.79498200 |
| N | -2.49156300 | 0.36776300  | -0.20240800 |
| H | 0.25074200  | -1.47230400 | 0.73856000  |
| O | -1.34872300 | -1.53042400 | 1.61899900  |
| H | -1.97441400 | -0.84819500 | 1.30544900  |
| H | -1.52569200 | -1.69303500 | 2.54985900  |
| H | -1.26436900 | -0.19424500 | -1.80955000 |
| C | -3.67476100 | 0.01125800  | -0.95632400 |
| H | -4.34480900 | 0.87542500  | -1.03826200 |
| H | -3.45123400 | -0.34677400 | -1.97487600 |
| H | -4.23201700 | -0.77602000 | -0.43336600 |

**S-7**

|   |             |             |             |
|---|-------------|-------------|-------------|
| N | -0.36426300 | 0.48860500  | 0.16162900  |
| H | 0.06047100  | -1.22590700 | -0.39018600 |
| H | -0.49888700 | 0.05759700  | 1.07848600  |
| C | -2.79556000 | 0.49463000  | -0.01850100 |
| C | -3.02300900 | -0.57645800 | -0.88801100 |
| C | -3.74034200 | 0.77631100  | 0.96822500  |
| C | -4.17230000 | -1.34977600 | -0.77188800 |

|   |             |             |             |
|---|-------------|-------------|-------------|
| H | -2.28909600 | -0.80277800 | -1.66130800 |
| C | -4.89619500 | 0.00589400  | 1.08482300  |
| H | -3.56947700 | 1.60830600  | 1.65070400  |
| C | -5.11307300 | -1.05885500 | 0.21591800  |
| H | -4.33656000 | -2.18088600 | -1.45346600 |
| H | -5.62539400 | 0.23703000  | 1.85780900  |
| H | -6.01266700 | -1.66290800 | 0.30614200  |
| C | -1.54075500 | 1.31248600  | -0.13772100 |
| H | -1.60069800 | 2.18881100  | 0.53274200  |
| H | -1.44211500 | 1.70014500  | -1.16092000 |
| C | 4.17626500  | -0.21166600 | 1.05339300  |
| C | 3.90680200  | -0.65891800 | -0.37851100 |
| C | 2.38296200  | -0.67673400 | -0.46053200 |
| C | 3.09784000  | 0.83496900  | 1.24490500  |
| H | 4.02544100  | -1.04691900 | 1.75015400  |
| H | 5.18541000  | 0.18438900  | 1.20331700  |
| H | 4.34025800  | -1.62985300 | -0.63073300 |
| H | 4.29320700  | 0.09202800  | -1.07986800 |
| H | 2.04882200  | -0.31653000 | -1.44700300 |
| H | 3.38955500  | 1.76998300  | 0.72948100  |
| H | 2.88377500  | 1.07147500  | 2.29492900  |
| N | 1.91648600  | 0.23431600  | 0.61208500  |
| C | 1.78640500  | -2.07131300 | -0.27253900 |
| O | 2.44461800  | -3.07427700 | -0.10859400 |
| O | 0.45460200  | -2.13381900 | -0.34025500 |
| C | 0.91056200  | 1.21069900  | 0.22815200  |
| N | 1.20160700  | 1.92182600  | -0.99667900 |
| H | 0.76031300  | 1.48988000  | -1.80220500 |
| C | 1.02434800  | 3.36384300  | -0.98510700 |
| H | 1.67076200  | 3.80708800  | -0.21856300 |
| H | 1.33930800  | 3.77402700  | -1.94936300 |
| H | -0.00888900 | 3.69981800  | -0.79171300 |
| H | 0.89220100  | 1.96607800  | 1.03747400  |

**S-8**

|   |            |             |             |
|---|------------|-------------|-------------|
| C | 3.49231900 | -0.75059100 | -1.94393400 |
| C | 2.97260700 | -1.79716700 | -0.95234200 |
| C | 1.79100900 | -1.13432500 | -0.22465000 |
| C | 3.06772100 | 0.55558300  | -1.29942800 |
| H | 4.57358700 | -0.82201100 | -2.09814100 |
| H | 3.00025100 | -0.85529700 | -2.91883900 |
| H | 3.74185400 | -2.04129600 | -0.21246700 |
| H | 2.67175500 | -2.72988600 | -1.43868200 |
| H | 0.84143200 | -1.65328200 | -0.43826500 |
| H | 2.99674900 | 1.39931800  | -1.99832600 |
| H | 3.76050000 | 0.84894200  | -0.48947100 |
| N | 1.74356100 | 0.22055100  | -0.79559300 |
| C | 1.96530500 | -1.16816200 | 1.30287900  |
| O | 2.98179000 | -1.49433500 | 1.87313300  |
| O | 0.88261900 | -0.79985500 | 1.99725100  |
| C | 0.95878100 | 1.29322100  | -0.24754700 |
| N | 1.59065800 | 2.00187800  | 0.84073900  |
| H | 1.69676200 | 1.41943700  | 1.66707600  |

|   |             |             |             |
|---|-------------|-------------|-------------|
| N | -0.36257400 | 0.75126900  | 0.12135400  |
| H | 0.20261500  | -0.40404400 | 1.38186000  |
| H | -0.86484300 | 1.47122000  | 0.64016400  |
| C | -2.56669300 | -0.03131800 | -0.59505100 |
| C | -2.76643600 | -1.18206800 | 0.17391900  |
| C | -3.66882000 | 0.75495000  | -0.93142600 |
| C | -4.04213300 | -1.53951600 | 0.59537600  |
| H | -1.91084500 | -1.80365000 | 0.43950400  |
| C | -4.94999500 | 0.39876900  | -0.51337900 |
| H | -3.52168500 | 1.65169100  | -1.53255600 |
| C | -5.13823100 | -0.74848200 | 0.25116600  |
| H | -4.18416100 | -2.43867200 | 1.19017900  |
| H | -5.80088500 | 1.01856300  | -0.78651000 |
| H | -6.13675700 | -1.02921800 | 0.57757500  |
| C | -1.18420100 | 0.35614400  | -1.03289400 |
| H | -1.23688000 | 1.17246500  | -1.77451200 |
| H | -0.68675800 | -0.48617800 | -1.53089500 |
| C | 1.01405700  | 3.29285800  | 1.16768900  |
| H | 1.64675300  | 3.80069200  | 1.90142800  |
| H | 0.98944000  | 3.91635200  | 0.26520200  |
| H | -0.00938000 | 3.25868900  | 1.58264700  |
| H | 0.84196900  | 2.04442400  | -1.05781200 |

#### S-11

|   |             |             |             |
|---|-------------|-------------|-------------|
| C | -1.18200600 | 0.98468600  | -0.93237400 |
| N | -1.56108300 | 2.03416500  | -0.04315100 |
| N | 0.41677100  | 0.80462800  | -0.79327700 |
| H | 0.75412500  | 0.33768100  | -1.63927800 |
| H | 0.83196100  | 1.75551100  | -0.77469400 |
| C | 2.36164400  | -0.26874300 | 0.22883000  |
| C | 2.76423800  | -1.50139300 | -0.28932200 |
| C | 3.32750900  | 0.69072500  | 0.54307200  |
| C | 4.11493600  | -1.77215600 | -0.49239200 |
| H | 2.01081300  | -2.25646300 | -0.51606000 |
| C | 4.67727900  | 0.42183400  | 0.34105500  |
| H | 3.01311100  | 1.65013900  | 0.95362900  |
| C | 5.07181700  | -0.81016300 | -0.17779900 |
| H | 4.42131600  | -2.73778600 | -0.88706700 |
| H | 5.42356200  | 1.17103500  | 0.59353000  |
| H | 6.12708800  | -1.02278700 | -0.33075100 |
| C | 0.90495400  | 0.03389900  | 0.39665300  |
| H | 0.68260900  | 0.63527800  | 1.28413200  |
| H | 0.30530100  | -0.88054700 | 0.46585900  |
| O | 0.81180000  | 3.52613700  | -0.21593800 |
| H | 1.23636200  | 3.98922200  | 0.51273500  |
| H | -0.09678800 | 3.28537000  | 0.07330100  |
| N | -1.81823300 | -0.23904600 | -0.77034400 |
| C | -2.25619100 | -2.51271700 | -1.07897000 |
| C | -3.31397200 | -1.92384000 | -0.15039300 |
| C | -2.69911800 | -0.62506900 | 0.35916500  |
| C | -1.68732100 | -1.28437900 | -1.77640500 |
| H | -1.47520100 | -2.99428700 | -0.47797600 |
| H | -2.65462300 | -3.24774900 | -1.78536700 |



|   |             |             |             |
|---|-------------|-------------|-------------|
| H | -3.56358700 | -2.59100200 | 0.67860500  |
| H | -4.23085300 | -1.70260100 | -0.71425100 |
| H | -3.46950100 | 0.14713800  | 0.50713100  |
| H | -2.25065200 | -1.02659600 | -2.69129800 |
| H | -0.63529500 | -1.43692100 | -2.07217300 |
| C | -1.87492000 | -0.73905100 | 1.67077700  |
| O | -1.49932600 | -1.87024800 | 2.02919300  |
| O | -1.60459500 | 0.37379600  | 2.21109300  |
| H | -1.69611300 | 1.62881700  | 0.90386700  |
| C | -2.75000200 | 2.74888300  | -0.50586900 |
| H | -3.04330200 | 3.47510600  | 0.25613300  |
| H | -2.52195400 | 3.29806600  | -1.42761500 |
| H | -3.60908500 | 2.08836900  | -0.69929700 |
| H | -1.23757600 | 1.34420300  | -1.97663900 |

### S-12

|   |             |             |             |
|---|-------------|-------------|-------------|
| C | -0.74786400 | 0.67307900  | -0.86260400 |
| N | -1.07079600 | 1.87999400  | -0.09340700 |
| N | 0.68086400  | 0.39670500  | -0.77444500 |
| H | 0.96402200  | -0.22701100 | -1.52742800 |
| H | 1.55474800  | 2.13759100  | -0.93769500 |
| C | 2.61576000  | -0.43462200 | 0.44223700  |
| C | 3.05842600  | -1.65456700 | -0.07529300 |
| C | 3.56233200  | 0.50596700  | 0.85434000  |
| C | 4.41891300  | -1.92595600 | -0.19171200 |
| H | 2.32755100  | -2.40505900 | -0.37893000 |
| C | 4.92400800  | 0.23673600  | 0.74492900  |
| H | 3.22256900  | 1.45199600  | 1.27538300  |
| C | 5.35475300  | -0.97900400 | 0.21843600  |
| H | 4.74968400  | -2.88144300 | -0.59219500 |
| H | 5.65065000  | 0.97392000  | 1.07878100  |
| H | 6.41792800  | -1.19184500 | 0.13635200  |
| C | 1.14613800  | -0.13774000 | 0.51931500  |
| H | 0.95711400  | 0.61878400  | 1.29307100  |
| H | 0.58291200  | -1.03612900 | 0.81349300  |
| O | 1.62931400  | 3.09173600  | -0.72826600 |
| H | 2.56608800  | 3.30766900  | -0.75468400 |
| H | -0.19770800 | 2.27517700  | 0.25450400  |
| N | -1.54443200 | -0.45016300 | -0.39847900 |
| C | -2.60465500 | -2.49185100 | -0.85453200 |
| C | -3.68954300 | -1.42325500 | -0.82598300 |
| C | -2.99192000 | -0.23098100 | -0.17730100 |
| C | -1.37388900 | -1.66997900 | -1.18721600 |
| H | -2.49302700 | -2.95059500 | 0.13674800  |
| H | -2.79232700 | -3.28756700 | -1.58167400 |
| H | -4.58640000 | -1.71432200 | -0.27371200 |
| H | -3.98132800 | -1.16189800 | -1.85145400 |
| H | -3.33337100 | 0.71081900  | -0.63692500 |
| H | -1.34476400 | -1.43993300 | -2.27333100 |
| H | -0.43562200 | -2.18002200 | -0.92953400 |
| C | -3.25594800 | -0.12208300 | 1.32847100  |
| O | -4.01902000 | -0.84835900 | 1.92851000  |
| O | -2.58699900 | 0.84555700  | 1.94339800  |

|   |             |            |             |
|---|-------------|------------|-------------|
| H | -1.99435200 | 1.31819200 | 1.28571000  |
| H | -0.94810500 | 0.86707300 | -1.94087000 |
| C | -1.72188800 | 2.93293600 | -0.87712500 |
| H | -1.83559300 | 3.82197500 | -0.25149700 |
| H | -1.14279000 | 3.20858500 | -1.77070300 |
| H | -2.72143500 | 2.61473800 | -1.19399100 |

**S-18**

|   |             |             |             |
|---|-------------|-------------|-------------|
| N | 0.29666900  | 0.62450600  | 0.53862700  |
| H | 0.83310300  | 1.04310400  | 1.29686200  |
| H | 0.00743000  | -1.14033100 | 0.57247000  |
| C | 2.48446100  | 0.08578000  | -0.40668100 |
| C | 3.50268500  | 0.96531600  | -0.02885600 |
| C | 2.76608100  | -1.28038900 | -0.48434700 |
| C | 4.77688400  | 0.49235400  | 0.27412800  |
| H | 3.29475400  | 2.03524600  | 0.01632200  |
| C | 4.04009900  | -1.75575900 | -0.18483500 |
| H | 1.98039800  | -1.97403300 | -0.77991400 |
| C | 5.04716700  | -0.87169600 | 0.19630800  |
| H | 5.56027700  | 1.18948100  | 0.56251500  |
| H | 4.24702100  | -2.82122700 | -0.25201000 |
| H | 6.04236900  | -1.24469500 | 0.42665900  |
| C | 1.10900900  | 0.61990100  | -0.69231200 |
| H | 0.58959600  | -0.00154800 | -1.43364500 |
| H | 1.20465100  | 1.63028300  | -1.12256300 |
| C | -4.19076700 | -0.19248300 | -0.63599100 |
| C | -3.82845500 | -0.86700300 | 0.67909800  |
| C | -2.30683300 | -0.77151800 | 0.70042800  |
| C | -3.22262700 | 0.97269600  | -0.65089400 |
| H | -3.99262100 | -0.87020300 | -1.47683400 |
| H | -5.23564000 | 0.12844300  | -0.69000700 |
| H | -4.17139900 | -1.90123600 | 0.76093700  |
| H | -4.24275900 | -0.29325500 | 1.51844700  |
| H | -1.93040200 | -0.59509400 | 1.72345900  |
| H | -3.57068600 | 1.76701700  | 0.03399700  |
| H | -3.09150200 | 1.42359400  | -1.63992000 |
| N | -1.95986600 | 0.37921100  | -0.17338200 |
| C | -1.63188300 | -2.04548700 | 0.18929400  |
| O | -2.23185200 | -3.00483300 | -0.24192800 |
| O | -0.30313600 | -2.03845400 | 0.26757400  |
| C | -1.01753600 | 1.30207700  | 0.42543400  |
| N | -1.03223400 | 2.54808700  | -0.29006900 |
| H | -1.30335100 | 1.54207200  | 1.47468400  |
| H | -0.82369000 | 2.41319800  | -1.27573400 |
| C | -0.22510100 | 3.59314200  | 0.30689300  |
| H | -0.31965900 | 4.50942600  | -0.28232200 |
| H | -0.59943400 | 3.80765600  | 1.31556200  |
| H | 0.85034800  | 3.35418000  | 0.39362500  |

**S-19**

|   |             |             |            |
|---|-------------|-------------|------------|
| N | -0.39185500 | 0.47365000  | 0.07343900 |
| H | 1.43556000  | -1.34266700 | 1.51553300 |
| H | -0.50083100 | -0.21021100 | 0.82001300 |

|   |             |             |             |
|---|-------------|-------------|-------------|
| C | -2.83393300 | 0.48597500  | 0.00852400  |
| C | -3.02223600 | -0.49276300 | -0.97253400 |
| C | -3.82487900 | 0.67363300  | 0.97209300  |
| C | -4.17914600 | -1.26363500 | -0.98903700 |
| H | -2.24636800 | -0.65107800 | -1.71987700 |
| C | -4.98761700 | -0.09516800 | 0.95624900  |
| H | -3.68403700 | 1.42993300  | 1.74380800  |
| C | -5.16659600 | -1.06613600 | -0.02408500 |
| H | -4.31188300 | -2.02294400 | -1.75636900 |
| H | -5.75096800 | 0.06249300  | 1.71485600  |
| H | -6.07056300 | -1.67057800 | -0.03626000 |
| C | -1.58273200 | 1.31852200  | 0.01982100  |
| H | -1.62211700 | 2.03164300  | 0.86613500  |
| H | -1.53626200 | 1.92564300  | -0.89661800 |
| C | 4.22604000  | -0.13271000 | 0.64772800  |
| C | 3.73534800  | -0.61313600 | -0.71409200 |
| C | 2.22006900  | -0.72627600 | -0.50414000 |
| C | 3.14611300  | 0.86532700  | 1.02478400  |
| H | 4.25479300  | -0.96458100 | 1.36551500  |
| H | 5.22277800  | 0.31738900  | 0.61638000  |
| H | 4.17768800  | -1.55452700 | -1.05338500 |
| H | 3.93334200  | 0.15315300  | -1.47385400 |
| H | 1.66690500  | -0.50726600 | -1.42521500 |
| H | 3.31052300  | 1.80919000  | 0.47760000  |
| H | 3.09596400  | 1.08902100  | 2.09740300  |
| N | 1.89454600  | 0.22834100  | 0.57561600  |
| C | 1.83580100  | -2.14601900 | -0.09748700 |
| O | 1.93441700  | -3.09250700 | -0.84442500 |
| O | 1.40895700  | -2.26573900 | 1.16091800  |
| C | 0.84559300  | 1.20198400  | 0.25936800  |
| N | 1.14865700  | 2.01737800  | -0.89832700 |
| H | 0.64733200  | 1.68078000  | -1.71428600 |
| C | 1.04590100  | 3.45798500  | -0.74370900 |
| H | 1.77208400  | 3.80798700  | -0.00011600 |
| H | 1.29790200  | 3.94077400  | -1.69265200 |
| H | 0.04935400  | 3.81752500  | -0.43271600 |
| H | 0.80601400  | 1.88320600  | 1.13615800  |

**S-20**

|   |             |             |             |
|---|-------------|-------------|-------------|
| N | 0.69875700  | 0.09637300  | -0.02169500 |
| H | -2.13565600 | -0.14415200 | 1.71967400  |
| H | 0.86987200  | -0.89837200 | -0.14998200 |
| C | 3.12647900  | 0.29977500  | -0.17770100 |
| C | 3.44528500  | 0.25123300  | 1.18315700  |
| C | 4.05857200  | -0.16623500 | -1.10511900 |
| C | 4.67153300  | -0.25079000 | 1.60442300  |
| H | 2.71816900  | 0.60959600  | 1.91020500  |
| C | 5.29030700  | -0.66745800 | -0.68646700 |
| H | 3.81720500  | -0.13466000 | -2.16719500 |
| C | 5.59851300  | -0.71177400 | 0.66949800  |
| H | 4.90820200  | -0.28087800 | 2.66560100  |
| H | 6.00677400  | -1.02684000 | -1.42165500 |
| H | 6.55764500  | -1.10360400 | 0.99998100  |

|   |             |             |             |
|---|-------------|-------------|-------------|
| C | 1.79952900  | 0.84327500  | -0.62696200 |
| H | 1.75200600  | 0.83265000  | -1.73331500 |
| H | 1.70689700  | 1.89600100  | -0.32137500 |
| C | -2.73301700 | -2.53139200 | -0.39630300 |
| C | -3.62417100 | -1.42210600 | -0.94086600 |
| C | -2.98295700 | -0.14666000 | -0.37346600 |
| C | -1.35773800 | -1.89426700 | -0.48101000 |
| H | -2.98066600 | -2.75283100 | 0.65091700  |
| H | -2.80200600 | -3.46505600 | -0.96246200 |
| H | -4.67985200 | -1.50946900 | -0.66708700 |
| H | -3.56508700 | -1.40048500 | -2.03629900 |
| H | -3.04347700 | 0.68011600  | -1.09350200 |
| H | -0.98369600 | -1.92356100 | -1.52376500 |
| H | -0.62110800 | -2.38915700 | 0.16284300  |
| N | -1.58796000 | -0.50568000 | -0.05479800 |
| C | -3.70866000 | 0.33492800  | 0.87874500  |
| O | -4.83696600 | 0.77301700  | 0.85075900  |
| O | -3.01680600 | 0.20113400  | 2.00799700  |
| C | -0.60580400 | 0.46841000  | -0.53775300 |
| N | -0.98023800 | 1.79097100  | -0.11952600 |
| H | -0.53343400 | 2.02584900  | 0.76141600  |
| C | -0.92233900 | 2.85812100  | -1.10045600 |
| H | -1.64013200 | 2.66505500  | -1.90724100 |
| H | -1.22090800 | 3.79582000  | -0.62332800 |
| H | 0.06921400  | 3.00881500  | -1.56132900 |
| H | -0.61688900 | 0.45995800  | -1.65834200 |

### S-21

|   |             |             |             |
|---|-------------|-------------|-------------|
| N | 0.75670000  | -0.01871400 | -0.10753200 |
| H | -2.62895900 | 1.35882300  | 0.61628900  |
| H | 0.87585800  | -0.53561600 | 0.76063200  |
| C | 3.16892600  | 0.31518100  | -0.18892000 |
| C | 4.12948300  | 0.78570200  | 0.70628100  |
| C | 3.48548100  | -0.77015700 | -1.01175900 |
| C | 5.38759400  | 0.18901200  | 0.77924200  |
| H | 3.89009200  | 1.62972800  | 1.35277000  |
| C | 4.73904000  | -1.36761400 | -0.94189000 |
| H | 2.73309300  | -1.14471300 | -1.70378500 |
| C | 5.69431500  | -0.88904700 | -0.04492300 |
| H | 6.12560000  | 0.56641200  | 1.48343300  |
| H | 4.97425600  | -2.20997800 | -1.58854000 |
| H | 6.67411200  | -1.35765300 | 0.01104600  |
| C | 1.81463000  | 0.96436700  | -0.27843700 |
| H | 1.68236600  | 1.41786500  | -1.27481700 |
| H | 1.76948900  | 1.79554100  | 0.44988800  |
| C | -2.88413000 | -2.04083900 | 1.26839600  |
| C | -3.25406800 | -2.11390000 | -0.21258200 |
| C | -2.76269800 | -0.75722400 | -0.72456000 |
| C | -1.54528200 | -1.29497000 | 1.27937700  |
| H | -3.64265500 | -1.45851600 | 1.80809900  |
| H | -2.82133700 | -3.02231200 | 1.74730300  |
| H | -4.32050400 | -2.26973700 | -0.39352100 |
| H | -2.68965500 | -2.90640200 | -0.71779900 |

|   |             |             |             |
|---|-------------|-------------|-------------|
| H | -2.59895500 | -0.76855900 | -1.81238800 |
| H | -0.69919900 | -1.99299800 | 1.38092300  |
| H | -1.49305700 | -0.58340500 | 2.12159500  |
| N | -1.50641100 | -0.62405700 | -0.01845500 |
| C | -3.85863000 | 0.29283000  | -0.47086800 |
| O | -4.94069000 | 0.18540800  | -1.01037700 |
| O | -3.60228500 | 1.28874100  | 0.36780700  |
| C | -0.60032100 | 0.45365800  | -0.26208000 |
| N | -0.94929500 | 1.65563200  | 0.55538700  |
| H | -0.43277400 | 1.65381900  | 1.43214800  |
| C | -0.83569300 | 2.94717400  | -0.11916400 |
| H | -1.51894000 | 2.96257800  | -0.97698600 |
| H | -1.15394300 | 3.74100800  | 0.56305800  |
| H | 0.17482100  | 3.18422300  | -0.48245400 |
| H | -0.73474400 | 0.77162900  | -1.31081400 |

### S-22

|   |             |             |             |
|---|-------------|-------------|-------------|
| N | -0.54717700 | 0.02154400  | -0.70309800 |
| H | -0.61405600 | -0.72289200 | -1.38870700 |
| C | -2.94108700 | 0.35187600  | -0.20814700 |
| C | -4.04961400 | 0.35221500  | -1.05390300 |
| C | -3.05082000 | -0.23387500 | 1.05622700  |
| C | -5.25362300 | -0.21858200 | -0.64468800 |
| H | -3.97071300 | 0.80826300  | -2.04014500 |
| C | -4.24930700 | -0.80620900 | 1.46667700  |
| H | -2.19104200 | -0.23431900 | 1.72654600  |
| C | -5.35454800 | -0.79941000 | 0.61530600  |
| H | -6.11174500 | -0.20977100 | -1.31234000 |
| H | -4.32610800 | -1.25378700 | 2.45474700  |
| H | -6.29258200 | -1.24456400 | 0.93799500  |
| C | -1.64879900 | 0.98528600  | -0.64640200 |
| H | -1.32718600 | 1.78840000  | 0.02773200  |
| H | -1.76003000 | 1.43955200  | -1.63786500 |
| C | 3.18254000  | -2.14351200 | -0.83109600 |
| C | 3.54249500  | -1.76329200 | 0.60294400  |
| C | 2.76596300  | -0.47196500 | 0.80327100  |
| C | 1.69718800  | -1.80359200 | -0.93587700 |
| H | 3.75362500  | -1.52034300 | -1.53053000 |
| H | 3.38109400  | -3.19136900 | -1.07156300 |
| H | 4.61101500  | -1.59505900 | 0.75268300  |
| H | 3.20091400  | -2.53359900 | 1.30706300  |
| H | 2.53731200  | -0.26781700 | 1.85679300  |
| H | 1.05182500  | -2.65872600 | -0.69215800 |
| H | 1.42270600  | -1.42311200 | -1.92864900 |
| N | 1.51314400  | -0.75142000 | 0.07529500  |
| C | 3.49117100  | 0.79094200  | 0.22411700  |
| O | 4.67706300  | 0.90199500  | 0.56476600  |
| O | 2.78527300  | 1.55195900  | -0.48916800 |
| C | 0.51421600  | 0.09086400  | 0.08450600  |
| H | 0.53786100  | 0.91340100  | 0.79968400  |
| O | 0.67105100  | 3.08884900  | 0.23874600  |
| H | 1.51771300  | 2.69495300  | -0.07154100 |
| H | 0.87588400  | 3.99302900  | 0.49250600  |

**S-23**

|   |             |             |             |
|---|-------------|-------------|-------------|
| C | 3.22431500  | 0.50488000  | 1.98800400  |
| C | 2.15340800  | 1.54931700  | 1.68881400  |
| C | 1.40310500  | 0.98985900  | 0.47880600  |
| C | 2.50167000  | -0.79051400 | 1.67008200  |
| H | 4.07453900  | 0.62744600  | 1.30328000  |
| H | 3.59774100  | 0.55043600  | 3.01564300  |
| H | 2.55654700  | 2.54532000  | 1.48821700  |
| H | 1.45805500  | 1.62276600  | 2.53540200  |
| H | 0.31863600  | 1.16327600  | 0.59045300  |
| H | 1.84569900  | -1.09944500 | 2.51019400  |
| H | 3.18650200  | -1.62228000 | 1.45995100  |
| N | 1.73515100  | -0.43644500 | 0.48608700  |
| C | 1.81063200  | 1.62421700  | -0.84970100 |
| O | 2.73597700  | 2.39136300  | -0.98927700 |
| O | 1.03986000  | 1.27852600  | -1.88506500 |
| C | 0.98347100  | -1.43944300 | -0.21323200 |
| N | 1.60030100  | -1.79625600 | -1.48688700 |
| H | 1.12782800  | -2.61596100 | -1.86226000 |
| N | -0.35744800 | -0.95557400 | -0.52124900 |
| H | 0.41423100  | 0.56910400  | -1.61074200 |
| H | -0.75241900 | -1.49859700 | -1.28708400 |
| C | -2.60642900 | -0.40289100 | 0.32628800  |
| C | -2.73315000 | 0.76014100  | -0.43899900 |
| C | -3.76056400 | -0.99722700 | 0.84044800  |
| C | -3.98578100 | 1.31623100  | -0.67986100 |
| H | -1.84376500 | 1.23261100  | -0.85226700 |
| C | -5.01512200 | -0.43974900 | 0.60594000  |
| H | -3.67434800 | -1.90864500 | 1.43145100  |
| C | -5.13100000 | 0.71943200  | -0.15633300 |
| H | -4.06669300 | 2.22026200  | -1.27895000 |
| H | -5.90351900 | -0.91638300 | 1.01397800  |
| H | -6.10948600 | 1.15489300  | -0.34458700 |
| C | -1.25728400 | -0.99486400 | 0.62968300  |
| H | -1.38245300 | -2.02334300 | 1.01382500  |
| H | -0.77681900 | -0.43086700 | 1.44575200  |
| C | 3.02914700  | -2.05704400 | -1.41631800 |
| H | 3.30338100  | -2.85574700 | -0.70291900 |
| H | 3.38749400  | -2.34536300 | -2.40829700 |
| H | 3.55277400  | -1.14048400 | -1.12240000 |
| H | 0.93485800  | -2.32427000 | 0.46871200  |

**S-24**

|   |             |             |             |
|---|-------------|-------------|-------------|
| C | -2.44081900 | -1.43040500 | 2.04238900  |
| C | -1.64342900 | -2.09015700 | 0.92058200  |
| C | -1.56537500 | -0.98924300 | -0.13237400 |
| C | -1.87972900 | -0.01661500 | 2.05891800  |
| H | -3.50739400 | -1.41143200 | 1.77983400  |
| H | -2.33908900 | -1.93567100 | 3.00761900  |
| H | -2.10392900 | -2.99918300 | 0.52641000  |
| H | -0.63199300 | -2.33821800 | 1.26968800  |
| H | -0.62989900 | -1.03570900 | -0.71491000 |

|   |             |             |             |
|---|-------------|-------------|-------------|
| H | -0.95790600 | 0.02567200  | 2.66906100  |
| H | -2.58386700 | 0.71965400  | 2.47267700  |
| N | -1.61387200 | 0.25255500  | 0.64746100  |
| C | -2.69809100 | -1.07873100 | -1.16188500 |
| O | -3.35352700 | -2.08431900 | -1.33968500 |
| O | -2.89721700 | 0.00567600  | -1.90330900 |
| C | -0.83205300 | 1.39473600  | 0.26621400  |
| N | -1.51332200 | 2.10531600  | -0.82101200 |
| H | -0.86618300 | 2.70270100  | -1.32910900 |
| N | 0.49616100  | 1.04298100  | -0.20057700 |
| H | -2.31281000 | 0.76945100  | -1.62451100 |
| H | 0.95763300  | 1.84826000  | -0.61826300 |
| C | 2.70707100  | 0.12250200  | 0.29564700  |
| C | 2.81735700  | -0.70068700 | -0.82961500 |
| C | 3.87083500  | 0.58209600  | 0.91180300  |
| C | 4.06666300  | -1.06018000 | -1.32245700 |
| H | 1.91053700  | -1.05410000 | -1.31863200 |
| C | 5.12530300  | 0.22194300  | 0.42134300  |
| H | 3.79426200  | 1.22694600  | 1.78685700  |
| C | 5.22547400  | -0.59997800 | -0.69679800 |
| H | 4.13817600  | -1.70324300 | -2.19671400 |
| H | 6.02402600  | 0.58767000  | 0.91277800  |
| H | 6.20240300  | -0.88250700 | -1.08207900 |
| C | 1.35246100  | 0.48301600  | 0.83850100  |
| H | 1.46576000  | 1.16397500  | 1.70416900  |
| H | 0.86136000  | -0.42251900 | 1.22406600  |
| C | -2.65656200 | 2.88022700  | -0.34575400 |
| H | -2.37747500 | 3.64312600  | 0.39793700  |
| H | -3.14656700 | 3.36973100  | -1.19157500 |
| H | -3.37843600 | 2.19631600  | 0.11465000  |
| H | -0.79006000 | 2.04111500  | 1.17380800  |

#### S-25

|   |             |             |             |
|---|-------------|-------------|-------------|
| C | 4.16389400  | -0.10833400 | 0.21412600  |
| C | 3.58182600  | -1.51321500 | 0.09707600  |
| C | 2.10504700  | -1.25477000 | -0.19172900 |
| C | 3.46582700  | 0.63557100  | -0.91175600 |
| H | 3.89556300  | 0.33270600  | 1.18130400  |
| H | 5.25235700  | -0.07925600 | 0.11134600  |
| H | 3.69452500  | -2.11754500 | 1.00079100  |
| H | 4.04901100  | -2.05374400 | -0.73705500 |
| H | 1.66017100  | -2.07672600 | -0.76348900 |
| H | 3.98437000  | 0.49449100  | -1.86932700 |
| H | 3.34932700  | 1.71040700  | -0.73202200 |
| N | 2.13575300  | -0.01085600 | -0.98875500 |
| C | 1.28381500  | -1.05496100 | 1.12962900  |
| O | 1.06796000  | -2.12139200 | 1.73366100  |
| O | 0.93441700  | 0.11538200  | 1.41257900  |
| C | 1.08396800  | 0.71227100  | -1.29356700 |
| N | -0.55646400 | 2.65007200  | 0.40154700  |
| H | -1.46446500 | 2.98122900  | 0.71599200  |
| N | -0.18222300 | 0.37099800  | -1.44398700 |
| H | -0.35804900 | 1.78847000  | 0.91610400  |

|   |             |             |             |
|---|-------------|-------------|-------------|
| H | -0.78488300 | 1.19523300  | -1.41892500 |
| C | -2.20591300 | -0.69018300 | -0.60726500 |
| C | -2.26720900 | -0.50902500 | 0.77863000  |
| C | -3.37831000 | -0.64016300 | -1.36186800 |
| C | -3.49381500 | -0.28053400 | 1.39378400  |
| H | -1.34968100 | -0.54493800 | 1.36886500  |
| C | -4.60592300 | -0.41158600 | -0.74354600 |
| H | -3.32977900 | -0.78936900 | -2.44037000 |
| C | -4.66315400 | -0.23106800 | 0.63568600  |
| H | -3.53767000 | -0.14932900 | 2.47232900  |
| H | -5.51569500 | -0.37967400 | -1.33842700 |
| H | -5.62055500 | -0.05761300 | 1.12183600  |
| C | -0.87944200 | -0.91263200 | -1.28088000 |
| H | -1.02314100 | -1.35643000 | -2.27469300 |
| H | -0.27061300 | -1.60259800 | -0.69352800 |
| C | 0.47482800  | 3.63110800  | 0.72779400  |
| H | 0.33458700  | 4.54173600  | 0.13444600  |
| H | 0.51447400  | 3.91789200  | 1.78937800  |
| H | 1.45931800  | 3.21676900  | 0.47363600  |
| H | 1.26971600  | 1.76999600  | -1.48642900 |

**S-26**

|   |             |             |             |
|---|-------------|-------------|-------------|
| C | -0.70710700 | -0.62243400 | -0.94781000 |
| N | -0.70123600 | 2.14643300  | 1.01277800  |
| N | 0.58775600  | -0.42232500 | -0.73661600 |
| H | 1.10790900  | -0.13471300 | -1.55715400 |
| C | 2.81340800  | -0.33908500 | 0.22405800  |
| C | 3.46348800  | -1.47093600 | -0.27681500 |
| C | 3.54282600  | 0.83342200  | 0.42295200  |
| C | 4.82098800  | -1.43030800 | -0.57495100 |
| H | 2.89705000  | -2.38971700 | -0.42890800 |
| C | 4.90412000  | 0.87551700  | 0.12857300  |
| H | 3.03867200  | 1.71648800  | 0.81376000  |
| C | 5.54356200  | -0.25510400 | -0.37126400 |
| H | 5.31858300  | -2.31665500 | -0.96103200 |
| H | 5.46411600  | 1.79321500  | 0.29054500  |
| H | 6.60574200  | -0.22324700 | -0.60107100 |
| C | 1.34320700  | -0.38504800 | 0.52655600  |
| H | 1.02099400  | 0.49595000  | 1.10087900  |
| H | 1.10554500  | -1.28844800 | 1.10069600  |
| H | -1.11847000 | 2.66571300  | 1.78015400  |
| N | -1.64274800 | -0.99067400 | -0.11252600 |
| C | -3.02345400 | -0.89685600 | 1.78955000  |
| C | -3.80945600 | -1.49516700 | 0.62852900  |
| C | -3.04965800 | -0.97669900 | -0.58065500 |
| C | -1.57195800 | -1.07439500 | 1.36363000  |
| H | -3.25365200 | 0.17337700  | 1.88271600  |
| H | -3.22618500 | -1.37235900 | 2.75339300  |
| H | -4.85223600 | -1.17368000 | 0.58894300  |
| H | -3.77879200 | -2.59246900 | 0.66880000  |
| H | -3.14866600 | -1.63218100 | -1.45500200 |
| H | -1.18807600 | -2.06313100 | 1.64824900  |
| H | -0.91745900 | -0.28768500 | 1.74840200  |



|   |             |             |             |
|---|-------------|-------------|-------------|
| C | -3.48552700 | 0.46599000  | -1.02124200 |
| O | -4.71090100 | 0.59879500  | -1.17031800 |
| O | -2.55686700 | 1.29297000  | -1.20076500 |
| H | -1.46104600 | 1.91403100  | 0.36469800  |
| H | -1.01950400 | -0.51384700 | -1.98319000 |
| C | 0.25557900  | 2.99370800  | 0.30989500  |
| H | 0.68304700  | 2.43501400  | -0.53387000 |
| H | -0.16605700 | 3.92404300  | -0.10033600 |
| H | 1.08410800  | 3.26650400  | 0.97650600  |

**S-27**

|   |             |             |             |
|---|-------------|-------------|-------------|
| N | -0.28350600 | 0.73779500  | -0.53682500 |
| H | -0.80261200 | 1.13579300  | -1.31427900 |
| H | 1.34018300  | -0.79118100 | 1.48263500  |
| C | -2.46288800 | 0.15242700  | 0.33886500  |
| C | -3.54090100 | 1.00299700  | 0.09137300  |
| C | -2.64672600 | -1.22826000 | 0.23092500  |
| C | -4.78783000 | 0.48630100  | -0.25644800 |
| H | -3.40026500 | 2.08131900  | 0.17784300  |
| C | -3.89073200 | -1.74769500 | -0.11174000 |
| H | -1.80485400 | -1.89365200 | 0.42172500  |
| C | -4.96381100 | -0.89103000 | -0.35670100 |
| H | -5.62142600 | 1.15925900  | -0.44410600 |
| H | -4.02468500 | -2.82429100 | -0.18690000 |
| H | -5.93629000 | -1.29875500 | -0.62289900 |
| C | -1.11162600 | 0.71797100  | 0.66700500  |
| H | -0.62268300 | 0.08995900  | 1.42379600  |
| H | -1.24176500 | 1.71957300  | 1.11662800  |
| C | 4.20692100  | -0.36812500 | 0.19846000  |
| C | 3.52457500  | -1.13282100 | -0.92791000 |
| C | 2.03425200  | -0.88366700 | -0.65564800 |
| C | 3.34847900  | 0.87997000  | 0.28647100  |
| H | 4.16093100  | -0.93510500 | 1.13899200  |
| H | 5.25824400  | -0.14142300 | -0.00337700 |
| H | 3.76263500  | -2.19986700 | -0.97115100 |
| H | 3.79402600  | -0.68939800 | -1.89487600 |
| H | 1.45718200  | -0.81184900 | -1.58600900 |
| H | 3.59786500  | 1.57660600  | -0.53363600 |
| H | 3.45300200  | 1.42885400  | 1.22663700  |
| N | 1.96996600  | 0.37252900  | 0.12208400  |
| C | 1.42085900  | -2.03941400 | 0.12576000  |
| O | 1.25153600  | -3.13931700 | -0.34816900 |
| O | 1.11154700  | -1.74880200 | 1.39135000  |
| C | 1.03277700  | 1.34976300  | -0.42981100 |
| N | 1.14256400  | 2.56927300  | 0.33613500  |
| H | 1.32848500  | 1.60781000  | -1.46978800 |
| H | 0.92636500  | 2.39678600  | 1.31527800  |
| C | 0.36328600  | 3.66841900  | -0.20206200 |
| H | 0.48365200  | 4.54856000  | 0.43561100  |
| H | 0.74211500  | 3.92742700  | -1.19865700 |
| H | -0.71775000 | 3.46033700  | -0.29991800 |

**S-28**

|   |             |             |             |
|---|-------------|-------------|-------------|
| N | -0.64840300 | 0.40426400  | -0.89482900 |
| H | -1.27274700 | 0.99516900  | -1.43733500 |
| H | 3.44201600  | 0.59826500  | -0.90096500 |
| C | -2.64232500 | -0.06425200 | 0.39464900  |
| C | -3.56384200 | 0.90957400  | 0.77942400  |
| C | -3.11067800 | -1.28620400 | -0.09636900 |
| C | -4.93344600 | 0.66757600  | 0.68200300  |
| H | -3.20275500 | 1.86466600  | 1.16174900  |
| C | -4.47542400 | -1.53230500 | -0.19345300 |
| H | -2.38892000 | -2.04188100 | -0.40708700 |
| C | -5.39041100 | -0.55403400 | 0.19677900  |
| H | -5.64247000 | 1.43336800  | 0.98804000  |
| H | -4.82979200 | -2.48813700 | -0.57272600 |
| H | -6.45819000 | -0.74651700 | 0.12333000  |
| C | -1.16653900 | 0.20525500  | 0.45211600  |
| H | -0.65308400 | -0.66130900 | 0.89789200  |
| H | -0.98153100 | 1.06749400  | 1.12141700  |
| C | 2.40794500  | -2.42513500 | -0.70392400 |
| C | 2.22272700  | -1.98408800 | 0.74455000  |
| C | 2.15113000  | -0.45187400 | 0.63587700  |
| C | 1.48555500  | -1.46915400 | -1.43756500 |
| H | 3.44906200  | -2.27838500 | -1.02247800 |
| H | 2.14951300  | -3.47510600 | -0.86974200 |
| H | 3.01301200  | -2.30983100 | 1.42709400  |
| H | 1.26806900  | -2.36452500 | 1.13103500  |
| H | 1.49019500  | -0.04599100 | 1.41465000  |
| H | 0.43451300  | -1.79366100 | -1.35639200 |
| H | 1.71732200  | -1.35460200 | -2.50447100 |
| N | 1.69676500  | -0.19525300 | -0.73780600 |
| C | 3.53150100  | 0.15988500  | 0.88826700  |
| O | 4.05252600  | 0.14897800  | 1.98144900  |
| O | 4.12324900  | 0.66492500  | -0.18841500 |
| C | 0.73329000  | 0.85646100  | -1.02872600 |
| N | 1.12029100  | 2.05773200  | -0.31365200 |
| H | 0.83616400  | 1.09180900  | -2.10201700 |
| H | 1.09564200  | 1.92244600  | 0.69348100  |
| C | 0.33737500  | 3.22669900  | -0.67395300 |
| H | 0.72469800  | 4.10179200  | -0.14470300 |
| H | 0.44264600  | 3.41584600  | -1.74935000 |
| H | -0.74127500 | 3.14024400  | -0.44972900 |

**S-29**

|   |             |             |             |
|---|-------------|-------------|-------------|
| N | -0.48883100 | 0.99823100  | -0.95362200 |
| H | -0.91736900 | 1.31982600  | -1.81320700 |
| H | 3.49156000  | 0.10544200  | -0.04884000 |
| C | -2.61988000 | 0.53114800  | 0.16949600  |
| C | -3.80017000 | 1.12317500  | 0.62223000  |
| C | -2.65970100 | -0.79423500 | -0.27041800 |
| C | -4.99349400 | 0.40538600  | 0.64785200  |
| H | -3.78405700 | 2.16028000  | 0.95694800  |
| C | -3.84998200 | -1.51451800 | -0.24690700 |
| H | -1.74372400 | -1.24929600 | -0.64462000 |
| C | -5.02186500 | -0.91745700 | 0.21410300  |

|   |             |             |             |
|---|-------------|-------------|-------------|
| H | -5.90449400 | 0.88316600  | 1.00143000  |
| H | -3.86402000 | -2.54623100 | -0.59149000 |
| H | -5.95302300 | -1.47895800 | 0.22928500  |
| C | -1.32591300 | 1.30462000  | 0.19751700  |
| H | -0.76969300 | 1.05540900  | 1.11029500  |
| H | -1.56683300 | 2.38052000  | 0.28737400  |
| C | 1.99456800  | -2.26629500 | -1.32490500 |
| C | 1.27511200  | -2.21638600 | 0.01895200  |
| C | 1.49223500  | -0.76321100 | 0.47428100  |
| C | 1.64302100  | -0.91110000 | -1.90875100 |
| H | 3.08022400  | -2.35690300 | -1.18166800 |
| H | 1.67034100  | -3.09736400 | -1.95850800 |
| H | 1.63506700  | -2.94019300 | 0.75659900  |
| H | 0.20138500  | -2.39264500 | -0.12453000 |
| H | 0.62984500  | -0.39775800 | 1.04172600  |
| H | 0.61085700  | -0.92925400 | -2.30033700 |
| H | 2.31245700  | -0.58323300 | -2.71379000 |
| N | 1.73797700  | 0.00697600  | -0.76045800 |
| C | 2.69450000  | -0.68741100 | 1.40960900  |
| O | 2.67265500  | -1.09986200 | 2.54669400  |
| O | 3.79298800  | -0.17958100 | 0.84904900  |
| C | 0.94339800  | 1.23132000  | -0.94562100 |
| N | 1.33210400  | 2.21128400  | 0.04338200  |
| H | 1.21009200  | 1.56177400  | -1.97092100 |
| H | 0.61231800  | 2.92526200  | 0.09269600  |
| C | 2.61947100  | 2.84657400  | -0.19973100 |
| H | 2.71696200  | 3.71632800  | 0.45574400  |
| H | 3.44629500  | 2.17307600  | 0.04342300  |
| H | 2.74411100  | 3.18120300  | -1.24490400 |

**S-30**

|   |             |             |             |
|---|-------------|-------------|-------------|
| N | -0.29698100 | 1.12590400  | -1.17371000 |
| H | -0.61076500 | 1.50898400  | -2.05608300 |
| H | 1.89640000  | 1.18043900  | 1.38372000  |
| C | -2.44133900 | 0.65827300  | -0.01925300 |
| C | -3.50621400 | 1.10187300  | 0.77048500  |
| C | -2.57025300 | -0.54997700 | -0.70371900 |
| C | -4.66951300 | 0.34884700  | 0.88459600  |
| H | -3.41881400 | 2.04963100  | 1.30257800  |
| C | -3.73716700 | -1.30515900 | -0.59410800 |
| H | -1.74571200 | -0.88887700 | -1.32842000 |
| C | -4.78880800 | -0.86099200 | 0.20151400  |
| H | -5.48765700 | 0.70742700  | 1.50526300  |
| H | -3.82303700 | -2.24523200 | -1.13488900 |
| H | -5.69905500 | -1.44983900 | 0.28641000  |
| C | -1.17741700 | 1.48603400  | -0.07507200 |
| H | -0.63344800 | 1.36106900  | 0.87108600  |
| H | -1.46296900 | 2.55371400  | -0.09744900 |
| C | 2.17700000  | -2.37034900 | -1.20817400 |
| C | 1.13847100  | -2.34333000 | -0.09394400 |
| C | 1.19365900  | -0.90104900 | 0.40519500  |
| C | 1.95068200  | -1.01947600 | -1.85663400 |
| H | 3.18968400  | -2.42379600 | -0.78597900 |

|   |            |             |             |
|---|------------|-------------|-------------|
| H | 2.04929700 | -3.20546300 | -1.90375000 |
| H | 1.32289600 | -3.05848200 | 0.71130300  |
| H | 0.14183400 | -2.53959500 | -0.51174300 |
| H | 0.17796300 | -0.55867000 | 0.65820700  |
| H | 1.04375900 | -1.05496500 | -2.49241700 |
| H | 2.78943200 | -0.67526800 | -2.47616800 |
| N | 1.76432900 | -0.12079200 | -0.71482000 |
| C | 2.03752000 | -0.72981700 | 1.67030600  |
| O | 2.47028400 | -1.65641700 | 2.32055900  |
| O | 2.24106800 | 0.52849100  | 2.05663600  |
| C | 1.14564500 | 1.14936900  | -1.05001700 |
| N | 1.60831000 | 2.14543300  | -0.07689400 |
| H | 1.53315800 | 1.39582000  | -2.05584000 |
| H | 0.99535600 | 2.95657400  | -0.10422700 |
| C | 2.99037600 | 2.56354600  | -0.31765500 |
| H | 3.29821400 | 3.27864300  | 0.45038900  |
| H | 3.64259300 | 1.68708500  | -0.25340600 |
| H | 3.12460200 | 3.02363300  | -1.30929100 |

**S-31**

|   |             |             |             |
|---|-------------|-------------|-------------|
| N | -0.10893400 | -1.97401100 | 0.01703600  |
| H | -0.04355100 | -2.97883300 | 0.09902200  |
| H | 2.83939700  | -1.23069300 | -0.92829100 |
| C | -2.29319000 | -0.83222800 | -0.41572400 |
| C | -2.98312900 | 0.09586300  | -1.20001700 |
| C | -2.78990600 | -1.15930500 | 0.84580600  |
| C | -4.15675400 | 0.67909000  | -0.73427700 |
| H | -2.58336700 | 0.37755300  | -2.17387200 |
| C | -3.96280000 | -0.57075100 | 1.31501700  |
| H | -2.25288700 | -1.87027800 | 1.47181100  |
| C | -4.65076200 | 0.34650700  | 0.52576800  |
| H | -4.67884000 | 1.40584100  | -1.35168600 |
| H | -4.33811100 | -0.82999500 | 2.30235000  |
| H | -5.56402800 | 0.80740500  | 0.89406500  |
| C | -1.04503700 | -1.46059300 | -0.98215700 |
| H | -0.50920900 | -0.76591900 | -1.63899400 |
| H | -1.31246200 | -2.32092200 | -1.60666500 |
| C | 2.20198200  | 1.89365500  | 1.45503300  |
| C | 0.81137800  | 2.30235400  | 0.98018100  |
| C | 0.37682000  | 1.09841900  | 0.15385400  |
| C | 2.01247600  | 0.43637000  | 1.84354300  |
| H | 2.91772300  | 1.97816200  | 0.62673400  |
| H | 2.57506500  | 2.49313300  | 2.29010600  |
| H | 0.79678400  | 3.20765100  | 0.36924000  |
| H | 0.13939400  | 2.44526400  | 1.83723900  |
| H | -0.71464700 | 1.01004000  | 0.10078200  |
| H | 1.65974400  | 0.34049100  | 2.87886700  |
| H | 2.89762500  | -0.19428000 | 1.70036700  |
| N | 0.93651600  | -0.03056800 | 0.93197400  |
| C | 0.93954700  | 1.15004100  | -1.30545200 |
| O | 0.57392800  | 2.15495900  | -1.93883900 |
| O | 1.64650000  | 0.18116200  | -1.67482700 |
| C | 0.75463300  | -1.31284700 | 0.78283900  |

|   |            |             |             |
|---|------------|-------------|-------------|
| N | 3.50399100 | -1.71886100 | -0.31990700 |
| H | 1.39192000 | -1.94842800 | 1.39521900  |
| H | 3.67403100 | -2.63436500 | -0.72653400 |
| C | 4.74792400 | -0.95384900 | -0.29881800 |
| H | 5.26522400 | -0.89465600 | -1.26890900 |
| H | 4.52994900 | 0.07675200  | 0.00736500  |
| H | 5.44673100 | -1.37516700 | 0.43381400  |

**S-32**

|   |             |             |             |
|---|-------------|-------------|-------------|
| N | -0.70022200 | -0.13732000 | -0.01622600 |
| H | -0.81085100 | 0.31346600  | 0.88876300  |
| C | -3.12478300 | -0.41558900 | -0.20282500 |
| C | -4.17535200 | -1.05614400 | 0.45518700  |
| C | -3.35566500 | 0.83380300  | -0.78676700 |
| C | -5.43667400 | -0.46793200 | 0.52601900  |
| H | -4.00337200 | -2.02777400 | 0.91765200  |
| C | -4.61269300 | 1.42532100  | -0.71416900 |
| H | -2.53717200 | 1.33947500  | -1.29588700 |
| C | -5.65762200 | 0.77583600  | -0.05829900 |
| H | -6.24464200 | -0.97998400 | 1.04362300  |
| H | -4.77916500 | 2.39751800  | -1.17298400 |
| H | -6.63941900 | 1.24006700  | -0.00124000 |
| C | -1.77670900 | -1.07647500 | -0.30154700 |
| H | -1.61223500 | -1.44805800 | -1.32538000 |
| H | -1.76029400 | -1.96788400 | 0.34826600  |
| C | 2.99975600  | 1.79888200  | 1.24537500  |
| C | 3.34900300  | 1.84520700  | -0.24062800 |
| C | 2.83115300  | 0.49031100  | -0.72680200 |
| C | 1.63091400  | 1.11598600  | 1.27485100  |
| H | 3.73816100  | 1.18401100  | 1.77801700  |
| H | 2.98676900  | 2.78389900  | 1.72033600  |
| H | 4.41448800  | 1.97894400  | -0.44093900 |
| H | 2.78969900  | 2.64106900  | -0.74664800 |
| H | 2.63020000  | 0.49538400  | -1.80872600 |
| H | 0.81553000  | 1.85653400  | 1.30141800  |
| H | 1.52568700  | 0.46712100  | 2.16075300  |
| N | 1.59999400  | 0.36015300  | 0.02542400  |
| C | 3.91101900  | -0.58188300 | -0.50251900 |
| O | 5.02819200  | -0.43290900 | -0.94736300 |
| O | 3.59374000  | -1.67026200 | 0.19330000  |
| C | 0.61978700  | -0.61599000 | -0.24680000 |
| H | 0.71105500  | -0.93118300 | -1.29664800 |
| O | 0.88826900  | -1.87264700 | 0.47316000  |
| H | 2.63218500  | -1.73285500 | 0.41003400  |
| H | 0.55056500  | -1.79103000 | 1.37595700  |

**S-34**

|   |             |             |             |
|---|-------------|-------------|-------------|
| C | -0.76932600 | -1.78535600 | 1.82962400  |
| C | -0.36742500 | -1.94216900 | 0.36577800  |
| C | -1.02896400 | -0.73754200 | -0.29889100 |
| C | -0.64789900 | -0.28492300 | 2.05044900  |
| H | -1.81177900 | -2.10484100 | 1.96923300  |
| H | -0.14409900 | -2.36334300 | 2.51698000  |

|   |             |             |             |
|---|-------------|-------------|-------------|
| H | -0.69294700 | -2.88258200 | -0.08513600 |
| H | 0.72190700  | -1.85924200 | 0.25982300  |
| H | -0.44929000 | -0.38269200 | -1.16607300 |
| H | 0.39317000  | -0.01226400 | 2.30343900  |
| H | -1.29891700 | 0.07812800  | 2.85795700  |
| N | -1.03356800 | 0.27275900  | 0.75556800  |
| C | -2.41672400 | -1.07588300 | -0.84953900 |
| O | -2.70062800 | -2.17673100 | -1.26891200 |
| O | -3.30530600 | -0.08265400 | -0.91442100 |
| C | -0.98792300 | 1.67158900  | 0.52221700  |
| N | -0.27673700 | 2.05684700  | -0.67003600 |
| H | -2.96681800 | 0.75645100  | -0.52925800 |
| H | -0.71140800 | 2.89619900  | -1.04034000 |
| C | 1.96058800  | 1.00418600  | -0.39311300 |
| C | 2.05602200  | 0.14983100  | -1.49608700 |
| C | 2.65240400  | 0.67631100  | 0.77247100  |
| C | 2.81690200  | -1.01205400 | -1.42904600 |
| H | 1.52483100  | 0.40537400  | -2.41315600 |
| C | 3.41901800  | -0.48664700 | 0.84491600  |
| H | 2.59159400  | 1.34265300  | 1.63375900  |
| C | 3.50152100  | -1.33353900 | -0.25604600 |
| H | 2.88077300  | -1.66787600 | -2.29433400 |
| H | 3.95335000  | -0.72816000 | 1.76102200  |
| H | 4.09936700  | -2.24048100 | -0.20548000 |
| C | 1.15614100  | 2.27404700  | -0.48137300 |
| H | 1.50004900  | 2.85511200  | -1.34640700 |
| H | 1.35984400  | 2.88736800  | 0.41688200  |
| H | -0.55744700 | 2.13559100  | 1.43430000  |
| O | -2.30697800 | 2.22215900  | 0.31861000  |
| H | -2.78275500 | 2.16808300  | 1.15770200  |

**S-34**

|   |             |             |             |
|---|-------------|-------------|-------------|
| C | -0.64191800 | -0.59784400 | 0.58453400  |
| N | 0.64010100  | -0.31541200 | 0.05790800  |
| H | 0.65624800  | -0.34432400 | -0.95946900 |
| C | 3.07974800  | -0.38287200 | 0.23781900  |
| C | 4.16448200  | -1.20664300 | -0.06427200 |
| C | 3.24009100  | 1.00336700  | 0.15210000  |
| C | 5.39179400  | -0.66140600 | -0.43571000 |
| H | 4.04598000  | -2.28844500 | -0.00897600 |
| C | 4.46356000  | 1.55060700  | -0.22126000 |
| H | 2.39274900  | 1.64943400  | 0.37746900  |
| C | 5.54401400  | 0.71988500  | -0.51512300 |
| H | 6.22697400  | -1.31744700 | -0.66995100 |
| H | 4.57566400  | 2.63077300  | -0.28315300 |
| H | 6.49904700  | 1.14887000  | -0.80921200 |
| C | 1.77180600  | -0.98308300 | 0.67967000  |
| H | 1.65441500  | -0.86334000 | 1.76796700  |
| H | 1.79221400  | -2.07139800 | 0.49587200  |
| H | -0.62721700 | -2.31659000 | -0.35560800 |
| N | -1.63012100 | 0.22886300  | -0.06036500 |
| C | -2.63454200 | 2.35156300  | -0.20300500 |
| C | -3.45609300 | 1.53947300  | 0.78846900  |

|   |             |             |             |
|---|-------------|-------------|-------------|
| C | -2.98955500 | 0.11117700  | 0.52890600  |
| C | -1.28716700 | 1.66330900  | -0.12057900 |
| H | -3.05463100 | 2.25275200  | -1.21246700 |
| H | -2.57869400 | 3.41601700  | 0.04391500  |
| H | -4.53651500 | 1.64363900  | 0.66251900  |
| H | -3.19504300 | 1.82709500  | 1.81531700  |
| H | -2.95154300 | -0.47556100 | 1.46252100  |
| H | -0.75123500 | 1.97361700  | 0.79623500  |
| H | -0.63248200 | 1.87070600  | -0.97296700 |
| C | -3.90113000 | -0.63891100 | -0.44331900 |
| O | -4.85898600 | -0.14721800 | -0.99299800 |
| O | -3.57301400 | -1.91723300 | -0.64875900 |
| H | -2.74387900 | -2.12562000 | -0.16485500 |
| H | -0.61544900 | -0.43658200 | 1.68282200  |
| O | -1.03012600 | -1.98298400 | 0.45923700  |

### S-38

|   |             |             |             |
|---|-------------|-------------|-------------|
| N | 0.10226700  | 2.14763200  | -0.44621200 |
| H | 0.09146500  | 3.14118900  | -0.63463300 |
| C | -1.94088900 | 0.84533000  | 0.18517600  |
| C | -2.41000700 | -0.10495100 | 1.09254400  |
| C | -2.49675500 | 0.88900100  | -1.09587500 |
| C | -3.41481000 | -0.99940800 | 0.72973100  |
| H | -1.96326800 | -0.16647900 | 2.08551900  |
| C | -3.50215900 | -0.00112100 | -1.46047000 |
| H | -2.11532300 | 1.61245200  | -1.81446700 |
| C | -3.96443400 | -0.94887200 | -0.54788600 |
| H | -3.75566500 | -1.74650500 | 1.44253300  |
| H | -3.92367800 | 0.04044100  | -2.46260100 |
| H | -4.74346200 | -1.65069700 | -0.83633300 |
| C | -0.86895200 | 1.82082000  | 0.60536400  |
| H | -0.37028100 | 1.44996700  | 1.51027900  |
| H | -1.35211800 | 2.75683000  | 0.91748600  |
| C | 3.03424200  | -1.52681000 | -1.08511000 |
| C | 1.54993400  | -1.81001300 | -1.31450400 |
| C | 0.88070500  | -0.76423600 | -0.42015100 |
| C | 3.10630300  | -0.00572300 | -0.90215200 |
| H | 3.36836700  | -2.03114200 | -0.16871900 |
| H | 3.67126200  | -1.88043600 | -1.90094300 |
| H | 1.25249600  | -2.82978600 | -1.05771500 |
| H | 1.26743100  | -1.61004000 | -2.35434800 |
| H | -0.15604500 | -0.56997300 | -0.72893100 |
| H | 3.48443100  | 0.51305300  | -1.79744400 |
| H | 3.77707900  | 0.25505800  | -0.06506000 |
| N | 1.72169900  | 0.38997100  | -0.65592400 |
| C | 0.81791600  | -1.28996200 | 1.02244600  |
| O | 0.31203700  | -2.35874200 | 1.28221600  |
| O | 1.35025900  | -0.53858600 | 1.99042300  |
| C | 1.46117000  | 1.73617000  | -0.30277100 |
| H | 2.07415600  | 2.37024400  | -0.96167100 |
| O | 1.91180700  | 2.01427500  | 1.07392500  |
| H | 1.67776500  | 0.33316000  | 1.66761600  |
| H | 2.84122500  | 2.27251600  | 1.06382800  |

**S-Product**

|   |             |             |             |
|---|-------------|-------------|-------------|
| N | 1.91719700  | -0.64715800 | 0.61358300  |
| H | 1.74140300  | -1.03131200 | 1.53290400  |
| C | -0.38352900 | -0.41231000 | -0.24188200 |
| C | -0.57348600 | 0.96989100  | -0.14697200 |
| C | -1.48707000 | -1.25659800 | -0.12687400 |
| C | -1.84418200 | 1.49394000  | 0.06095200  |
| H | 0.28493800  | 1.63444100  | -0.24191300 |
| C | -2.76313500 | -0.73393100 | 0.08006100  |
| H | -1.34698500 | -2.33472800 | -0.20060700 |
| C | -2.94345800 | 0.64221900  | 0.17547200  |
| H | -1.98033300 | 2.57084000  | 0.12909100  |
| H | -3.61515300 | -1.40405300 | 0.16821500  |
| H | -3.93697200 | 1.05400500  | 0.33664800  |
| C | 0.99606300  | -0.97289100 | -0.46514500 |
| H | 1.44030300  | -0.56187200 | -1.37891400 |
| H | 0.94748700  | -2.06258000 | -0.58282900 |
| C | 2.94119000  | 0.22787300  | 0.47971100  |
| H | 3.50696200  | 0.35516100  | 1.42273500  |
| O | 3.23545200  | 0.82013100  | -0.54654400 |

**S-TS3-IM1**

|   |             |             |             |
|---|-------------|-------------|-------------|
| C | 0.82324800  | 2.31327500  | 1.08114900  |
| C | 1.33983500  | 1.99523500  | -0.32219000 |
| C | 0.81486200  | 0.58979300  | -0.63106600 |
| C | -0.48963700 | 1.55809000  | 1.12493200  |
| H | 1.50666600  | 1.92442300  | 1.84741600  |
| H | 0.69497500  | 3.38421200  | 1.26115800  |
| H | 2.42992700  | 2.01448500  | -0.39862300 |
| H | 0.93599100  | 2.71045400  | -1.04728200 |
| H | 0.21137500  | 0.59090300  | -1.54963800 |
| H | -1.24550100 | 2.04126200  | 0.49300200  |
| H | -0.90365800 | 1.37190700  | 2.12072700  |
| N | -0.15209200 | 0.26194300  | 0.48071800  |
| C | 1.88369000  | -0.50449700 | -0.78816600 |
| O | 3.06085200  | -0.20868800 | -0.89377700 |
| O | 1.42345000  | -1.72059800 | -0.84088500 |
| H | 0.32565400  | -1.78662600 | -0.69918500 |
| C | -1.42484800 | -0.63205100 | 0.00202300  |
| N | -2.10261400 | 0.10292100  | -1.01386300 |
| H | -2.08418800 | -0.45287600 | -1.86313500 |
| O | -0.94421200 | -1.81021600 | -0.35785400 |
| H | 0.29104700  | -0.35076400 | 1.18855300  |
| O | 0.13570300  | -2.00102900 | 2.20521700  |
| H | 0.91327300  | -2.53939600 | 2.38499900  |
| H | -0.26626000 | -2.36764400 | 1.39238500  |
| H | -2.02154600 | -0.63379400 | 0.93961600  |
| C | -3.44681400 | 0.56865700  | -0.69772300 |
| H | -3.41710400 | 1.28914000  | 0.12727600  |
| H | -3.86201000 | 1.08724400  | -1.56584100 |
| H | -4.13405300 | -0.24375400 | -0.41478300 |



**S-TSIM1-5a**

|   |             |             |             |
|---|-------------|-------------|-------------|
| C | 0.39271200  | 2.66141800  | 0.28154800  |
| C | 1.55585900  | 1.82015500  | -0.21756300 |
| C | 0.88498400  | 0.49167500  | -0.51820100 |
| C | -0.38263100 | 1.68454900  | 1.15302000  |
| H | 0.70450500  | 3.55102900  | 0.83599900  |
| H | -0.22798500 | 2.98810600  | -0.56266300 |
| H | 2.31659600  | 1.68103600  | 0.56168900  |
| H | 2.05916300  | 2.22559400  | -1.09918400 |
| H | 0.31089000  | 0.58604500  | -1.45484500 |
| H | -1.46198100 | 1.86822000  | 1.14976900  |
| H | -0.03664500 | 1.69612800  | 2.19326000  |
| N | -0.10791900 | 0.32130900  | 0.59265500  |
| C | 1.86724800  | -0.66345400 | -0.71123800 |
| O | 3.05700400  | -0.46036100 | -0.80861300 |
| O | 1.35826300  | -1.87787000 | -0.86047200 |
| H | 0.38120700  | -1.91312600 | -0.64673100 |
| C | -1.39792400 | -0.44428500 | 0.20543600  |
| N | -1.97470400 | 0.08906800  | -0.98574900 |
| H | -1.67751600 | -0.48473000 | -1.77187400 |
| O | -1.07049200 | -1.76827300 | 0.14346200  |
| H | 0.26356100  | -0.44957500 | 1.44964900  |
| O | 0.16570300  | -1.54985900 | 2.15407900  |
| H | 0.97610400  | -2.05501700 | 2.27727400  |
| H | -0.49880000 | -1.91704100 | 1.18948900  |
| H | -2.07016000 | -0.22232200 | 1.05428400  |
| C | -3.43402200 | 0.15679700  | -0.95754100 |
| H | -3.79560600 | 0.51954700  | -1.92328100 |
| H | -3.91142100 | -0.81246300 | -0.74618100 |
| H | -3.75473300 | 0.87568900  | -0.19542100 |

**S-TS5a-6a**

|   |             |             |             |
|---|-------------|-------------|-------------|
| C | -2.22562000 | -1.41919600 | 0.33132200  |
| C | -2.20717500 | -0.56053700 | -0.93096100 |
| C | -0.87474300 | 0.17696800  | -0.80658500 |
| C | -0.77558100 | -1.87775800 | 0.48055800  |
| H | -2.51727300 | -0.80498900 | 1.19311600  |
| H | -2.92300200 | -2.25939700 | 0.27299100  |
| H | -3.04502900 | 0.13592100  | -1.00599200 |
| H | -2.19071400 | -1.19130200 | -1.82838800 |
| H | -0.51503500 | 0.50745000  | -1.79112800 |
| H | -0.60618600 | -2.87415900 | 0.04901300  |
| H | -0.45743700 | -1.90288200 | 1.53219800  |
| N | -0.01109800 | -0.87668600 | -0.27538700 |
| C | -1.02990200 | 1.44016600  | 0.07157000  |
| O | -1.84881200 | 2.27016800  | -0.30073000 |
| O | -0.30351700 | 1.56409900  | 1.13752200  |
| H | 0.54671700  | 0.82545400  | 1.37606800  |
| C | 1.32188800  | -0.75457800 | -0.08805800 |
| N | 2.04554600  | 0.03822200  | -0.92590000 |
| H | 1.59316700  | 0.89986900  | -1.20938500 |
| O | 1.53074600  | 0.06427400  | 1.54074500  |
| H | 1.37679100  | -0.54278100 | 2.27530800  |

|   |            |             |             |
|---|------------|-------------|-------------|
| H | 1.82973100 | -1.67385400 | 0.20829800  |
| C | 3.47400900 | 0.16393100  | -0.68680200 |
| H | 3.90582200 | -0.83459200 | -0.56379900 |
| H | 3.94279800 | 0.62904300  | -1.55683100 |
| H | 3.69393200 | 0.75316800  | 0.21097800  |

**S-TS6a-6c**

|   |             |             |             |
|---|-------------|-------------|-------------|
| C | -2.40588500 | -0.99498800 | 0.56361100  |
| C | -2.28367600 | -0.48757400 | -0.87116900 |
| C | -0.82580800 | -0.06838700 | -0.97552200 |
| C | -1.10982100 | -1.76460800 | 0.77082800  |
| H | -2.45178500 | -0.14402600 | 1.25497700  |
| H | -3.28848500 | -1.61861300 | 0.73075300  |
| H | -2.94686800 | 0.35329600  | -1.08649500 |
| H | -2.49099300 | -1.29701800 | -1.58298900 |
| H | -0.40596300 | -0.21557500 | -1.98250700 |
| H | -1.19095500 | -2.79805200 | 0.40375900  |
| H | -0.77341500 | -1.78035400 | 1.81273500  |
| N | -0.15252900 | -1.01661500 | -0.05924800 |
| C | -0.54840300 | 1.39891500  | -0.57053000 |
| O | -1.47222700 | 2.15495500  | -0.30082800 |
| O | 0.70895900  | 1.71007000  | -0.54547900 |
| H | 0.88968700  | 1.53984300  | 1.40901300  |
| C | 1.16084000  | -1.18515100 | 0.01880600  |
| N | 2.00550200  | -0.38459100 | -0.56552700 |
| H | 1.49788500  | 0.67756900  | -0.72216200 |
| O | 0.81716900  | 1.09648800  | 2.27239100  |
| H | 0.28669200  | 1.69001200  | 2.81255000  |
| H | 1.50798100  | -2.03620700 | 0.61421800  |
| C | 3.43340100  | -0.60875600 | -0.48607700 |
| H | 3.65959600  | -1.52306700 | 0.07501400  |
| H | 3.86221700  | -0.70330100 | -1.48897600 |
| H | 3.91849800  | 0.23511500  | 0.01519900  |

**S-TSIM2**

|   |             |             |             |
|---|-------------|-------------|-------------|
| C | 1.94172800  | -1.61899300 | -0.26749900 |
| C | 1.80281000  | -0.74175400 | 0.97379000  |
| C | 0.60659900  | 0.14142100  | 0.62379400  |
| C | 0.49522900  | -1.94338400 | -0.61251500 |
| H | 2.40636800  | -1.04646700 | -1.08242300 |
| H | 2.54381600  | -2.51673800 | -0.10275100 |
| H | 2.69071300  | -0.14917200 | 1.20699200  |
| H | 1.55499200  | -1.35624600 | 1.84801500  |
| H | 0.02737000  | 0.45327000  | 1.50543900  |
| H | 0.13330300  | -2.80226200 | -0.02534400 |
| H | 0.34011600  | -2.16424700 | -1.67482700 |
| N | -0.21913500 | -0.72051700 | -0.22233000 |
| C | 1.04208700  | 1.43417100  | -0.06596000 |
| O | 1.98445500  | 2.08507400  | 0.31830500  |
| O | 0.31407300  | 1.83197800  | -1.11362100 |
| C | -1.58803700 | -0.68382400 | -0.16173800 |
| N | -2.23084700 | 0.30478000  | 0.32190300  |
| H | -0.41741300 | 1.20898200  | -1.25965600 |

|   |             |             |             |
|---|-------------|-------------|-------------|
| C | -3.67311300 | 0.22311600  | 0.32037100  |
| H | -4.05294400 | 0.29851600  | 1.34633500  |
| H | -4.09610500 | 1.06855900  | -0.23543100 |
| H | -4.06031300 | -0.71093800 | -0.12152700 |
| H | -2.07206200 | -1.57403400 | -0.60076800 |

**S-TS6c-6d**

|   |             |             |             |
|---|-------------|-------------|-------------|
| C | 0.98722000  | 2.09034500  | 0.11872800  |
| C | 1.07651100  | 1.18241200  | -1.10229200 |
| C | 0.60204000  | -0.16560500 | -0.55163700 |
| C | -0.31871900 | 1.64065200  | 0.74803400  |
| H | 1.83012000  | 1.91023700  | 0.80051300  |
| H | 0.98163100  | 3.15502700  | -0.13290300 |
| H | 2.07231900  | 1.11399600  | -1.54974000 |
| H | 0.37369100  | 1.52205700  | -1.87324000 |
| H | 0.08380400  | -0.75302800 | -1.31995100 |
| H | -1.17430700 | 2.06875500  | 0.20443500  |
| H | -0.41321600 | 1.89752500  | 1.80891900  |
| N | -0.30093900 | 0.16472400  | 0.57873200  |
| C | 1.77778100  | -1.00993000 | -0.06328700 |
| O | 2.63618800  | -1.42289800 | -0.80848300 |
| O | 1.78495100  | -1.24634900 | 1.24758900  |
| C | -1.59519200 | -0.43740200 | 0.50895900  |
| N | -2.42134100 | -0.13224200 | -0.39530600 |
| H | 0.97823600  | -0.78735600 | 1.58800100  |
| C | -3.70603200 | -0.79268900 | -0.38952500 |
| H | -3.81940600 | -1.52938700 | 0.42168300  |
| H | -4.49724300 | -0.04027300 | -0.30015100 |
| H | -3.85503500 | -1.29608400 | -1.35096300 |
| H | -1.81540100 | -1.18155900 | 1.29267600  |

**S-TS6d-6b**

|   |             |             |             |
|---|-------------|-------------|-------------|
| C | -1.64325100 | -1.56972100 | 0.99399800  |
| C | -2.17292200 | -1.24610000 | -0.40348700 |
| C | -1.17283600 | -0.20685800 | -0.89328500 |
| C | -0.11864600 | -1.50452500 | 0.85935100  |
| H | -1.98711100 | -0.80686200 | 1.70351000  |
| H | -1.97846400 | -2.54155100 | 1.36694900  |
| H | -3.19326400 | -0.85562100 | -0.40288100 |
| H | -2.13585100 | -2.13055700 | -1.05188000 |
| H | -1.13251300 | -0.12086800 | -1.98682600 |
| H | 0.34623700  | -2.48955100 | 0.72092100  |
| H | 0.35123100  | -1.02797400 | 1.72414800  |
| N | 0.08876900  | -0.73087600 | -0.37860400 |
| C | -1.49184800 | 1.20051700  | -0.32049600 |
| O | -2.55219700 | 1.69477300  | -0.69761300 |
| O | -0.65756600 | 1.74014100  | 0.48975700  |
| C | 1.26642500  | -0.38224500 | -0.88247900 |
| N | 2.34868500  | -0.32409800 | -0.15448200 |
| H | 0.45420600  | 1.39188300  | 1.05375200  |
| O | 1.45053400  | 1.18192800  | 1.53723200  |
| H | 2.03483800  | 0.28592800  | 0.86021900  |
| H | 1.37396800  | 1.07796000  | 2.49086800  |

|   |            |             |             |
|---|------------|-------------|-------------|
| H | 1.27290500 | -0.09657200 | -1.94322000 |
| C | 3.61991000 | -0.02524900 | -0.78654000 |
| H | 4.31853800 | -0.85882800 | -0.66024700 |
| H | 3.50360800 | 0.16645200  | -1.86103500 |
| H | 4.06233800 | 0.86132900  | -0.32006300 |

**S-TS6a-7**

|   |             |             |             |
|---|-------------|-------------|-------------|
| N | -0.34828400 | 0.65231900  | 0.60723000  |
| H | -0.04523700 | -0.27115900 | 0.20882500  |
| H | -0.61211200 | 0.54598300  | 1.58647300  |
| C | -2.70549600 | 0.31465800  | -0.05266300 |
| C | -2.67867400 | -1.00824800 | -0.50891500 |
| C | -3.87326400 | 0.81682600  | 0.52215900  |
| C | -3.80752800 | -1.81071700 | -0.38569100 |
| H | -1.76543200 | -1.40481000 | -0.95594700 |
| C | -5.00559800 | 0.01315500  | 0.64067700  |
| H | -3.89896900 | 1.84778500  | 0.87468700  |
| C | -4.97333300 | -1.30221800 | 0.18756500  |
| H | -3.77925800 | -2.83728800 | -0.74303700 |
| H | -5.91228700 | 0.41606300  | 1.08625400  |
| H | -5.85544500 | -1.93171300 | 0.27764500  |
| C | -1.47895500 | 1.17744000  | -0.17421800 |
| H | -1.70096300 | 2.20194600  | 0.15187900  |
| H | -1.14095400 | 1.21878600  | -1.21790900 |
| C | 3.06983300  | -1.41606300 | 1.74314600  |
| C | 3.84745400  | -1.12941000 | 0.46179600  |
| C | 2.85263300  | -0.31341700 | -0.36371300 |
| C | 2.33360000  | -0.10560500 | 2.00934300  |
| H | 2.34407400  | -2.21909000 | 1.56385700  |
| H | 3.70462700  | -1.71439100 | 2.58278700  |
| H | 4.16582500  | -2.02764500 | -0.07318300 |
| H | 4.73605800  | -0.52290400 | 0.68210700  |
| H | 3.38060700  | 0.34520000  | -1.06755200 |
| H | 2.90612100  | 0.56307100  | 2.67115300  |
| H | 1.35289300  | -0.27605100 | 2.47654300  |
| N | 2.20797300  | 0.49443600  | 0.67915300  |
| C | 1.92274000  | -1.23959400 | -1.19914600 |
| O | 2.48961600  | -1.81671000 | -2.13996600 |
| O | 0.70391400  | -1.32478100 | -0.85985800 |
| C | 1.30307500  | 1.48456000  | 0.43892100  |
| N | 1.35523000  | 2.10856600  | -0.77831100 |
| H | 1.51220300  | 1.52436200  | -1.58978500 |
| C | 0.77544300  | 3.41495500  | -1.01158800 |
| H | 0.65127100  | 3.92942000  | -0.05341000 |
| H | 1.44766800  | 4.02058500  | -1.62768100 |
| H | -0.20245500 | 3.37491500  | -1.50821500 |
| H | 1.16750900  | 2.18368900  | 1.27057000  |

**S-TS6a-8**

|   |            |             |             |
|---|------------|-------------|-------------|
| C | 2.54672200 | -2.11585900 | -1.72029400 |
| C | 2.83778800 | -2.07995200 | -0.22069400 |
| C | 1.80634100 | -1.09281000 | 0.27880700  |
| C | 2.21656100 | -0.66239500 | -2.07139600 |

|   |             |             |             |
|---|-------------|-------------|-------------|
| H | 3.37516200  | -2.50292400 | -2.32086300 |
| H | 1.67433500  | -2.75540200 | -1.91084300 |
| H | 3.84118500  | -1.69049000 | -0.00764900 |
| H | 2.74396400  | -3.05627000 | 0.26368900  |
| H | 0.80927700  | -1.57639300 | 0.23133300  |
| H | 1.39488500  | -0.58147600 | -2.80031800 |
| H | 3.08753400  | -0.13852400 | -2.48863600 |
| N | 1.85737400  | -0.05741200 | -0.77981800 |
| C | 1.92104100  | -0.55464900 | 1.71935600  |
| O | 2.87134800  | -0.93172600 | 2.41483500  |
| O | 0.97596600  | 0.23605400  | 2.04031300  |
| C | 1.50595500  | 1.25060500  | -0.72259900 |
| N | 2.00461700  | 2.11330900  | 0.21285200  |
| H | 2.01320600  | 1.72826800  | 1.15877200  |
| N | -0.37401100 | 1.17587900  | -0.28724900 |
| H | -0.20238900 | 0.81256500  | 0.67079700  |
| H | -0.82097400 | 2.08871400  | -0.21417600 |
| C | -2.52629200 | -0.04365600 | -0.48869000 |
| C | -2.60484100 | -0.57486000 | 0.80318300  |
| C | -3.70336100 | 0.20197100  | -1.19485200 |
| C | -3.84139800 | -0.85303000 | 1.37478100  |
| H | -1.69197400 | -0.76389700 | 1.37080900  |
| C | -4.94368700 | -0.07944200 | -0.62399900 |
| H | -3.64936700 | 0.61489300  | -2.20187800 |
| C | -5.01437900 | -0.60667500 | 0.66170000  |
| H | -3.89016700 | -1.26364800 | 2.38036800  |
| H | -5.85439100 | 0.11803900  | -1.18465700 |
| H | -5.98080000 | -0.82358400 | 1.11036000  |
| C | -1.18293200 | 0.25877400  | -1.09780400 |
| H | -1.30328400 | 0.69099800  | -2.09953600 |
| H | -0.59797500 | -0.66407100 | -1.21520000 |
| C | 1.62167000  | 3.50860800  | 0.13359500  |
| H | 2.33862900  | 4.11301000  | 0.69418000  |
| H | 1.64500200  | 3.83838200  | -0.91107400 |
| H | 0.61945700  | 3.70951900  | 0.54177200  |
| H | 1.41918600  | 1.70546400  | -1.71549000 |

#### S-TS6a-11

|   |             |             |             |
|---|-------------|-------------|-------------|
| C | -1.48784200 | 0.77635900  | -1.14622900 |
| N | -2.05347600 | 1.85054700  | -0.47548100 |
| N | 0.41031700  | 0.96179700  | -0.83659800 |
| H | 0.90187800  | 0.74511200  | -1.70447200 |
| H | 0.56024500  | 1.95346700  | -0.61772600 |
| C | 2.41768200  | -0.08728000 | 0.13021200  |
| C | 2.91912800  | -1.33507200 | -0.24294500 |
| C | 3.30796200  | 0.97204800  | 0.33252400  |
| C | 4.28918100  | -1.52521200 | -0.41253400 |
| H | 2.22857500  | -2.16613400 | -0.38835800 |
| C | 4.67558400  | 0.78485700  | 0.16418200  |
| H | 2.91812400  | 1.94690500  | 0.62803000  |
| C | 5.16822200  | -0.46523200 | -0.21048900 |
| H | 4.66955600  | -2.50303400 | -0.69850100 |
| H | 5.36106700  | 1.61272100  | 0.32929900  |

|   |             |             |             |
|---|-------------|-------------|-------------|
| H | 6.23791400  | -0.61212600 | -0.33952100 |
| C | 0.93914000  | 0.13037200  | 0.26535200  |
| H | 0.66186900  | 0.61805800  | 1.20819800  |
| H | 0.40794100  | -0.82938600 | 0.25818900  |
| O | 0.14990200  | 3.45441300  | 0.64194700  |
| H | 0.22241900  | 3.28720000  | 1.58872900  |
| H | -0.73423200 | 3.12382200  | 0.39608600  |
| N | -1.80535000 | -0.48550400 | -0.80076700 |
| C | -1.64275000 | -2.82048400 | -0.70584800 |
| C | -2.85780100 | -2.37120600 | 0.10067300  |
| C | -2.59688200 | -0.89877100 | 0.38787400  |
| C | -1.37158000 | -1.62726200 | -1.61083300 |
| H | -0.79646200 | -2.98365300 | -0.02628500 |
| H | -1.81096500 | -3.74146100 | -1.27184500 |
| H | -2.97445700 | -2.92969300 | 1.03224700  |
| H | -3.77226000 | -2.48068800 | -0.49808800 |
| H | -3.52895700 | -0.31454000 | 0.40180300  |
| H | -1.96204900 | -1.67311800 | -2.53969000 |
| H | -0.31269100 | -1.52836100 | -1.89194700 |
| C | -1.82027100 | -0.59084800 | 1.70376600  |
| O | -1.35192600 | -1.54521200 | 2.34335000  |
| O | -1.72054700 | 0.64575100  | 1.95491800  |
| H | -2.26290000 | 1.58483200  | 0.50334900  |
| C | -3.10527600 | 2.55205200  | -1.20461200 |
| H | -3.43261900 | 3.41246400  | -0.61622100 |
| H | -2.71660900 | 2.92670000  | -2.15850400 |
| H | -3.98057100 | 1.91737400  | -1.40975600 |
| H | -1.37168000 | 0.94012000  | -2.22336700 |

S-TS11-12

|   |             |             |             |
|---|-------------|-------------|-------------|
| C | -1.00027800 | 0.93598200  | -0.97518100 |
| N | -1.46391000 | 1.96930600  | -0.10418700 |
| N | 0.54922500  | 0.82568200  | -0.77163000 |
| H | 0.97000900  | 0.42719000  | -1.61304000 |
| H | 0.86974800  | 1.86312900  | -0.64372300 |
| C | 2.46409500  | -0.25856300 | 0.29778200  |
| C | 2.88368800  | -1.52762700 | -0.10533700 |
| C | 3.41877400  | 0.73255100  | 0.54177200  |
| C | 4.23976100  | -1.80408300 | -0.26349700 |
| H | 2.14125000  | -2.30622200 | -0.28241300 |
| C | 4.77285800  | 0.45836200  | 0.38338800  |
| H | 3.09230300  | 1.72391200  | 0.85546400  |
| C | 5.18464000  | -0.81073900 | -0.02050600 |
| H | 4.55803700  | -2.79721200 | -0.57104200 |
| H | 5.50931600  | 1.23433500  | 0.57688900  |
| H | 6.24355600  | -1.02612600 | -0.14091200 |
| C | 1.00339900  | 0.05083600  | 0.42110000  |
| H | 0.78146600  | 0.66596500  | 1.30045600  |
| H | 0.39860700  | -0.86118800 | 0.48567000  |
| O | 0.61036500  | 3.30880000  | -0.22654400 |
| H | 1.00088200  | 3.71546500  | 0.55177700  |
| H | -0.52319300 | 2.74596000  | -0.01513100 |
| N | -1.59157900 | -0.32915600 | -0.75004700 |

|   |             |             |             |
|---|-------------|-------------|-------------|
| C | -2.11970400 | -2.56802600 | -1.05761400 |
| C | -3.31445500 | -1.88933500 | -0.39421700 |
| C | -2.75828000 | -0.56241600 | 0.11598200  |
| C | -1.40784300 | -1.39885200 | -1.71741800 |
| H | -1.46803200 | -3.01358700 | -0.29316100 |
| H | -2.40282600 | -3.35208100 | -1.76594700 |
| H | -3.75135900 | -2.47527600 | 0.41795500  |
| H | -4.09335600 | -1.69199600 | -1.14166300 |
| H | -3.50667400 | 0.23880600  | 0.00995700  |
| H | -1.85638100 | -1.14591100 | -2.69699900 |
| H | -0.33819400 | -1.60178000 | -1.88671100 |
| C | -2.33626000 | -0.58933800 | 1.59275600  |
| O | -2.45607200 | -1.57456500 | 2.29614500  |
| O | -1.83428700 | 0.54583000  | 2.03605800  |
| H | -1.73576700 | 1.23194400  | 1.24523600  |
| H | -1.06121200 | 1.22713400  | -2.04807400 |
| C | -2.57020800 | 2.71565300  | -0.69593000 |
| H | -2.88184000 | 3.50098600  | -0.00082700 |
| H | -2.27377800 | 3.20002300  | -1.64161000 |
| H | -3.44987600 | 2.08875800  | -0.90486500 |

#### S-TS6b-18

|   |             |             |             |
|---|-------------|-------------|-------------|
| N | -0.42939600 | 0.40103000  | -0.72762900 |
| H | -1.02777000 | 0.62817800  | -1.52161400 |
| H | -0.01933300 | -0.55593800 | -0.82558100 |
| C | -2.57205700 | -0.06071000 | 0.40260100  |
| C | -3.66563300 | 0.80577000  | 0.40142300  |
| C | -2.78562500 | -1.43161800 | 0.22768400  |
| C | -4.95861000 | 0.31332600  | 0.23209000  |
| H | -3.50366300 | 1.87513900  | 0.54052500  |
| C | -4.07477900 | -1.92413700 | 0.05846900  |
| H | -1.93046000 | -2.10760800 | 0.22213100  |
| C | -5.16397500 | -1.05235500 | 0.06044400  |
| H | -5.80452500 | 0.99678600  | 0.23593400  |
| H | -4.23180700 | -2.99196300 | -0.07363900 |
| H | -6.17135100 | -1.44037600 | -0.07036200 |
| C | -1.17224100 | 0.46782700  | 0.53646700  |
| H | -0.60003800 | -0.12303300 | 1.26430300  |
| H | -1.19657800 | 1.50814100  | 0.89535800  |
| C | 3.31043900  | -0.28799500 | 1.79752200  |
| C | 4.05179400  | -0.52049300 | 0.48431800  |
| C | 2.92508100  | -0.43571800 | -0.54239500 |
| C | 2.34501900  | 0.84253500  | 1.45423000  |
| H | 2.74554500  | -1.18971100 | 2.06758600  |
| H | 3.96436600  | -0.03190700 | 2.63606600  |
| H | 4.56177000  | -1.48435900 | 0.42720200  |
| H | 4.78483200  | 0.27991200  | 0.31415400  |
| H | 3.29491900  | -0.12862200 | -1.53084300 |
| H | 2.80757000  | 1.82810100  | 1.62740400  |
| H | 1.41324100  | 0.79108100  | 2.03504200  |
| N | 2.10210600  | 0.65019500  | 0.02286100  |
| C | 2.21921000  | -1.81260900 | -0.71893800 |
| O | 2.98016500  | -2.72512700 | -1.07802700 |

|   |             |             |             |
|---|-------------|-------------|-------------|
| O | 0.97600800  | -1.87893200 | -0.49853900 |
| C | 1.23868300  | 1.38412500  | -0.69676200 |
| N | 0.91217900  | 2.64713600  | -0.27060500 |
| H | 1.35625900  | 1.29544600  | -1.77961800 |
| H | 0.88238700  | 2.78421900  | 0.73253500  |
| C | -0.05712000 | 3.40557000  | -1.03376700 |
| H | -0.02744200 | 4.45222400  | -0.72356900 |
| H | 0.20499200  | 3.36254100  | -2.09615300 |
| H | -1.08762900 | 3.03459900  | -0.91704600 |

**S-TS7-19**

|   |             |             |             |
|---|-------------|-------------|-------------|
| N | -0.43332500 | 0.46734000  | 0.24565000  |
| H | 0.58752500  | -1.48554500 | 0.65642000  |
| H | -0.57400600 | 0.09708900  | 1.18628900  |
| C | -2.86786700 | 0.37734100  | -0.01668400 |
| C | -2.86721200 | -0.95104400 | -0.45312600 |
| C | -4.05148900 | 0.91992300  | 0.48693700  |
| C | -4.02838200 | -1.71542600 | -0.39020000 |
| H | -1.94657400 | -1.38485300 | -0.83981200 |
| C | -5.21597300 | 0.15841400  | 0.54531800  |
| H | -4.05968900 | 1.95128900  | 0.83870900  |
| C | -5.20731200 | -1.16314600 | 0.10733800  |
| H | -4.01178900 | -2.74818600 | -0.73080500 |
| H | -6.12962000 | 0.59628100  | 0.94115800  |
| H | -6.11359300 | -1.76213100 | 0.15633900  |
| C | -1.62896100 | 1.22768600  | -0.10828100 |
| H | -1.75693200 | 2.12526700  | 0.52655500  |
| H | -1.51424400 | 1.59377300  | -1.13857700 |
| C | 4.18931300  | 0.01297200  | 1.00060800  |
| C | 3.92266200  | -0.30773200 | -0.46458400 |
| C | 2.41832100  | -0.56635900 | -0.46571800 |
| C | 2.99869700  | 0.89135100  | 1.33250700  |
| H | 4.17298900  | -0.90660700 | 1.60296800  |
| H | 5.14627500  | 0.51442700  | 1.17443300  |
| H | 4.48560700  | -1.15904400 | -0.85503700 |
| H | 4.13807600  | 0.57228000  | -1.08414300 |
| H | 1.97536600  | -0.28485800 | -1.43217800 |
| H | 3.17569000  | 1.90812600  | 0.93680600  |
| H | 2.78675400  | 0.97221000  | 2.40575900  |
| N | 1.86701700  | 0.25911200  | 0.63022500  |
| C | 2.09826700  | -2.05200300 | -0.29892100 |
| O | 2.78130000  | -2.93363300 | -0.76885400 |
| O | 0.96967400  | -2.33196400 | 0.35531100  |
| C | 0.82119700  | 1.21448400  | 0.26447200  |
| N | 1.07293400  | 1.91818000  | -0.97137300 |
| H | 0.65137800  | 1.44651800  | -1.76561900 |
| C | 0.80763300  | 3.34716300  | -0.98658700 |
| H | 1.41753100  | 3.84157500  | -0.22155200 |
| H | 1.10665000  | 3.75903400  | -1.95517000 |
| H | -0.24587700 | 3.62292300  | -0.80856600 |
| H | 0.82093700  | 1.98104300  | 1.06438200  |

**S-TS19-20**



|   |             |             |             |
|---|-------------|-------------|-------------|
| N | 0.60163600  | -0.36904800 | -0.04964200 |
| H | -1.10275300 | 1.58160800  | 0.65873700  |
| H | 0.64199200  | 0.17682200  | 0.80801600  |
| C | 3.05139900  | -0.41568500 | -0.00424000 |
| C | 3.21885200  | 0.75169200  | -0.75551400 |
| C | 4.08496500  | -0.83080700 | 0.83630600  |
| C | 4.39841300  | 1.48392700  | -0.66929200 |
| H | 2.40876400  | 1.08523600  | -1.40140600 |
| C | 5.26919900  | -0.10102500 | 0.92133700  |
| H | 3.96035400  | -1.73480900 | 1.43180500  |
| C | 5.42844300  | 1.05889200  | 0.16883700  |
| H | 4.51416300  | 2.39141600  | -1.25752100 |
| H | 6.06502800  | -0.43701600 | 1.58225400  |
| H | 6.34971900  | 1.63270300  | 0.23685200  |
| C | 1.78614500  | -1.22135300 | -0.11540000 |
| H | 1.77618800  | -2.00547200 | 0.66659300  |
| H | 1.78107200  | -1.75489100 | -1.07818400 |
| C | -3.69248500 | -0.06952600 | 1.79140900  |
| C | -4.07116500 | 0.03428500  | 0.31830900  |
| C | -2.72761500 | 0.35513600  | -0.34684400 |
| C | -2.36543100 | -0.80531700 | 1.72666600  |
| H | -3.55667300 | 0.93218800  | 2.22299000  |
| H | -4.43400600 | -0.59685800 | 2.39915100  |
| H | -4.83138300 | 0.78897200  | 0.09830700  |
| H | -4.43998600 | -0.93330800 | -0.04692700 |
| H | -2.65484200 | -0.04124200 | -1.36727600 |
| H | -2.53492200 | -1.89203700 | 1.62025000  |
| H | -1.74035800 | -0.65504100 | 2.61619500  |
| N | -1.71207800 | -0.25994600 | 0.52259100  |
| C | -2.53665000 | 1.86500300  | -0.46863000 |
| O | -3.26968600 | 2.56423000  | -1.13080200 |
| O | -1.50918200 | 2.36258100  | 0.21994000  |
| C | -0.65497700 | -1.09692500 | -0.06639100 |
| N | -0.94611000 | -1.50622800 | -1.41258100 |
| H | -0.12624900 | -1.47155900 | -2.00498000 |
| C | -1.70325600 | -2.73425800 | -1.53499800 |
| H | -2.70791100 | -2.60054900 | -1.11099100 |
| H | -1.83026300 | -2.98644400 | -2.59125400 |
| H | -1.23660000 | -3.59339900 | -1.02054700 |
| H | -0.58955800 | -1.99848100 | 0.59292400  |

#### S-TS20-21

|   |             |             |             |
|---|-------------|-------------|-------------|
| N | 0.72897700  | 0.05593200  | -0.03694300 |
| H | -2.19831000 | 1.03074200  | 1.46023000  |
| H | 0.84702300  | -0.95046200 | 0.03903800  |
| C | 3.15587800  | 0.19609200  | -0.27022900 |
| C | 3.46626900  | 0.46292300  | 1.06698200  |
| C | 4.10278100  | -0.44755500 | -1.06657100 |
| C | 4.69916900  | 0.09576400  | 1.59411000  |
| H | 2.72426600  | 0.95618400  | 1.69277800  |
| C | 5.34127300  | -0.81515700 | -0.54186900 |
| H | 3.86792800  | -0.66347100 | -2.10848800 |
| C | 5.64173000  | -0.54438300 | 0.78944000  |

|   |             |             |             |
|---|-------------|-------------|-------------|
| H | 4.92807200  | 0.31026500  | 2.63562400  |
| H | 6.06946200  | -1.31685400 | -1.17502500 |
| H | 6.60609300  | -0.83233000 | 1.20137200  |
| C | 1.82330000  | 0.60795100  | -0.83087600 |
| H | 1.75853600  | 0.31433500  | -1.89635300 |
| H | 1.74112000  | 1.70527300  | -0.80816200 |
| C | -2.71667600 | -2.53823900 | -0.04986400 |
| C | -3.51951200 | -1.53385900 | -0.86286200 |
| C | -2.96669100 | -0.20051100 | -0.36409000 |
| C | -1.33329100 | -1.91486300 | -0.08379400 |
| H | -3.08918100 | -2.57946000 | 0.98319700  |
| H | -2.73261800 | -3.55323100 | -0.45775400 |
| H | -4.60253100 | -1.59947200 | -0.73259200 |
| H | -3.29121800 | -1.64969800 | -1.93070800 |
| H | -2.99344200 | 0.55756100  | -1.16255200 |
| H | -0.85525900 | -2.12762000 | -1.06163000 |
| H | -0.67717700 | -2.29053600 | 0.71060500  |
| N | -1.57996200 | -0.47215400 | 0.06978700  |
| C | -3.81490600 | 0.38087500  | 0.77006600  |
| O | -5.02132300 | 0.27976500  | 0.80441000  |
| O | -3.14621900 | 1.04416100  | 1.70889300  |
| C | -0.58356600 | 0.40070700  | -0.54105700 |
| N | -0.88208200 | 1.78201100  | -0.21226600 |
| H | -0.20377800 | 2.11154400  | 0.46861300  |
| C | -1.04296200 | 2.71645400  | -1.31467900 |
| H | -1.93602300 | 2.46865000  | -1.90041100 |
| H | -1.19153600 | 3.72142700  | -0.91018400 |
| H | -0.18537900 | 2.74531700  | -2.00836500 |
| H | -0.63100800 | 0.29272400  | -1.65794400 |

#### S-TS21-22

|   |             |             |             |
|---|-------------|-------------|-------------|
| N | 0.75434600  | -0.06272000 | -0.09432900 |
| H | -1.90264700 | 1.57020300  | 0.93895500  |
| H | 0.89182400  | -0.53552100 | 0.79317600  |
| C | 3.16186600  | 0.31529200  | -0.22950100 |
| C | 4.07979900  | 0.92772100  | 0.62316700  |
| C | 3.53442300  | -0.84965500 | -0.90684800 |
| C | 5.35439800  | 0.39136500  | 0.79651800  |
| H | 3.79514000  | 1.83399000  | 1.15676800  |
| C | 4.80439800  | -1.38832500 | -0.73349200 |
| H | 2.81879900  | -1.33207200 | -1.57104000 |
| C | 5.71798500  | -0.76787500 | 0.11865700  |
| H | 6.06048100  | 0.87811800  | 1.46486600  |
| H | 5.08534800  | -2.29322400 | -1.26713700 |
| H | 6.71088200  | -1.19030600 | 0.25303900  |
| C | 1.79213300  | 0.90365400  | -0.42307900 |
| H | 1.64269400  | 1.19563100  | -1.47363200 |
| H | 1.70581900  | 1.82576200  | 0.17708200  |
| C | -2.77548300 | -2.29284700 | 1.00599300  |
| C | -3.31497600 | -2.06576400 | -0.40715500 |
| C | -2.84760400 | -0.64502300 | -0.72109300 |
| C | -1.41424300 | -1.59123800 | 1.00255300  |
| H | -3.43796800 | -1.82070700 | 1.73983100  |

|   |             |             |             |
|---|-------------|-------------|-------------|
| H | -2.68757200 | -3.35182700 | 1.26610500  |
| H | -4.40173100 | -2.15787100 | -0.47891800 |
| H | -2.85812700 | -2.77301900 | -1.11204000 |
| H | -2.76174000 | -0.46422500 | -1.80107100 |
| H | -0.59014100 | -2.30032500 | 0.83204800  |
| H | -1.22422000 | -1.05560300 | 1.94604300  |
| N | -1.50542200 | -0.65980900 | -0.12225000 |
| C | -3.84191400 | 0.39245200  | -0.12916100 |
| O | -4.90223800 | 0.49824000  | -0.76713000 |
| O | -3.50337100 | 0.99022000  | 0.93298800  |
| C | -0.54899000 | 0.23327000  | -0.41920700 |
| N | -0.98090600 | 1.85844100  | 0.53893900  |
| H | -0.31590900 | 2.05309800  | 1.28466300  |
| C | -1.16977500 | 3.00890900  | -0.34239400 |
| H | -1.96171500 | 2.77033100  | -1.06080200 |
| H | -1.47800000 | 3.90473600  | 0.20688200  |
| H | -0.24965300 | 3.23063600  | -0.89549100 |
| H | -0.66492100 | 0.72151500  | -1.39244400 |

#### S-TS8-23

|   |             |             |             |
|---|-------------|-------------|-------------|
| C | -3.12275300 | -0.59318900 | 2.24705400  |
| C | -2.87613500 | -1.63629300 | 1.15998500  |
| C | -1.69210700 | -1.09036500 | 0.35472300  |
| C | -2.80578900 | 0.69175400  | 1.50537100  |
| H | -4.14415000 | -0.62383000 | 2.63944700  |
| H | -2.42492700 | -0.72002200 | 3.08503500  |
| H | -3.74480800 | -1.69777600 | 0.49378900  |
| H | -2.68194700 | -2.64180400 | 1.54577400  |
| H | -0.75532700 | -1.60088400 | 0.64407800  |
| H | -2.59178100 | 1.54963900  | 2.15677300  |
| H | -3.65826100 | 0.96128200  | 0.85409400  |
| N | -1.60959500 | 0.31904400  | 0.76319700  |
| C | -1.85482900 | -1.34846400 | -1.15627000 |
| O | -2.89277000 | -1.68925600 | -1.67585800 |
| O | -0.72295100 | -1.27935400 | -1.86571500 |
| C | -0.92690700 | 1.28520800  | -0.04709500 |
| N | -1.56003000 | 1.55817000  | -1.32878600 |
| H | -0.87584500 | 1.76275000  | -2.04987100 |
| N | 0.42285300  | 0.78097500  | -0.31163500 |
| H | -0.05863800 | -0.75070300 | -1.36010500 |
| H | 0.90034000  | 1.42397100  | -0.94192800 |
| C | 2.63713900  | 0.21591300  | 0.53088000  |
| C | 2.88586800  | -1.08353800 | 0.07814600  |
| C | 3.69733600  | 1.11965700  | 0.60423300  |
| C | 4.16811900  | -1.46994100 | -0.29498200 |
| H | 2.06380100  | -1.79778100 | 0.02283300  |
| C | 4.98517400  | 0.73573900  | 0.23397400  |
| H | 3.51208300  | 2.13247000  | 0.96150700  |
| C | 5.22168600  | -0.55926400 | -0.21731800 |
| H | 4.34846400  | -2.48395500 | -0.64402700 |
| H | 5.80324000  | 1.44922300  | 0.30025800  |
| H | 6.22555200  | -0.86162300 | -0.50593200 |
| C | 1.24302200  | 0.63442100  | 0.89790200  |

|   |             |             |             |
|---|-------------|-------------|-------------|
| H | 1.26841800  | 1.57366100  | 1.47823700  |
| H | 0.76530700  | -0.11697000 | 1.53835200  |
| C | -2.59888200 | 2.57282900  | -1.29807700 |
| H | -2.85178600 | 2.86094300  | -2.32199700 |
| H | -3.51324300 | 2.17865700  | -0.84152500 |
| H | -2.30593400 | 3.48279400  | -0.74271000 |
| H | -0.89301300 | 2.21471400  | 0.56992300  |

**S-TS23-24**

|   |             |             |             |
|---|-------------|-------------|-------------|
| C | -3.15876400 | -0.56782600 | 2.01511800  |
| C | -2.07302800 | -1.58011300 | 1.66825200  |
| C | -1.40436600 | -0.99361400 | 0.42625500  |
| C | -2.47366900 | 0.75016100  | 1.70421500  |
| H | -4.02199200 | -0.70123800 | 1.34894900  |
| H | -3.50570200 | -0.63865300 | 3.05051100  |
| H | -2.45252800 | -2.58873000 | 1.48636300  |
| H | -1.33390700 | -1.62697700 | 2.47951200  |
| H | -0.31798200 | -1.18170400 | 0.44414300  |
| H | -1.81260100 | 1.06288900  | 2.53844100  |
| H | -3.18465700 | 1.56646000  | 1.52007400  |
| N | -1.71329300 | 0.43627500  | 0.50393700  |
| C | -1.92263500 | -1.58259500 | -0.88349200 |
| O | -2.82625500 | -2.38278100 | -0.96818400 |
| O | -1.28116100 | -1.15960700 | -1.97880000 |
| C | -0.95149300 | 1.45842700  | -0.15501200 |
| N | -1.55419000 | 1.86225600  | -1.42358300 |
| H | -1.08053000 | 2.69810000  | -1.75953700 |
| N | 0.38363000  | 0.97858000  | -0.47457400 |
| H | -0.65104300 | -0.44251100 | -1.75251200 |
| H | 0.78837200  | 1.54110100  | -1.22021600 |
| C | 2.62600400  | 0.36828600  | 0.33430000  |
| C | 2.73929300  | -0.75634800 | -0.48884400 |
| C | 3.78759200  | 0.93096600  | 0.86632100  |
| C | 3.98658500  | -1.30782200 | -0.76514700 |
| H | 1.84231900  | -1.19808800 | -0.92015000 |
| C | 5.03707000  | 0.37878000  | 0.59458100  |
| H | 3.71166900  | 1.81381000  | 1.50054700  |
| C | 5.13962800  | -0.74372800 | -0.22248500 |
| H | 4.05770900  | -2.18269000 | -1.40733700 |
| H | 5.93175800  | 0.83071500  | 1.01679100  |
| H | 6.11381700  | -1.17571500 | -0.43899500 |
| C | 1.28180200  | 0.95115700  | 0.67532200  |
| H | 1.41552300  | 1.95576600  | 1.11713100  |
| H | 0.80043400  | 0.34457700  | 1.46019800  |
| C | -2.98575900 | 2.11150600  | -1.36701200 |
| H | -3.27835500 | 2.86609700  | -0.61449300 |
| H | -3.32541200 | 2.45562900  | -2.34776600 |
| H | -3.51233900 | 1.17826600  | -1.13815200 |
| H | -0.90782200 | 2.31881100  | 0.55766700  |

**S-TS24-25**

|   |            |             |             |
|---|------------|-------------|-------------|
| C | 3.20995100 | -1.48377300 | -1.36297100 |
| C | 1.83341800 | -2.13377700 | -1.24800900 |

|   |             |             |             |
|---|-------------|-------------|-------------|
| C | 1.07541200  | -1.16384500 | -0.34515300 |
| C | 2.89066100  | 0.00272100  | -1.48362200 |
| H | 3.78849600  | -1.67150900 | -0.45151100 |
| H | 3.79160800  | -1.84652700 | -2.21531100 |
| H | 1.85307400  | -3.13831200 | -0.81826400 |
| H | 1.35001800  | -2.18786100 | -2.23379300 |
| H | -0.00783400 | -1.25057400 | -0.47413000 |
| H | 2.81426500  | 0.32182200  | -2.53197600 |
| H | 3.62649400  | 0.64053000  | -0.97974000 |
| N | 1.56856900  | 0.13977300  | -0.84238500 |
| C | 1.38854600  | -1.44188600 | 1.15680900  |
| O | 0.84666600  | -2.47377200 | 1.58513600  |
| O | 2.15518200  | -0.64315900 | 1.75745100  |
| C | 1.05808600  | 1.33167100  | -0.58533000 |
| N | 1.79047700  | 2.02722800  | 1.24268700  |
| H | 1.12248200  | 2.58203500  | 1.77101600  |
| N | -0.28985000 | 1.44540100  | -0.28906700 |
| H | 1.87840200  | 1.08223900  | 1.65888000  |
| H | -0.52899400 | 2.37581200  | 0.03330800  |
| C | -2.53953900 | 0.44866100  | -0.53166400 |
| C | -2.47891100 | -0.24465700 | 0.67966700  |
| C | -3.78260000 | 0.66691900  | -1.12776400 |
| C | -3.64285000 | -0.72084200 | 1.27520600  |
| H | -1.51582000 | -0.41080700 | 1.15972300  |
| C | -4.94832400 | 0.19044400  | -0.53306900 |
| H | -3.83779600 | 1.21701500  | -2.06719200 |
| C | -4.87997200 | -0.50634000 | 0.67049000  |
| H | -3.58007100 | -1.26536400 | 2.21418400  |
| H | -5.91058300 | 0.36852900  | -1.00780300 |
| H | -5.78848600 | -0.87873300 | 1.13796000  |
| C | -1.28850700 | 0.91744600  | -1.22681000 |
| H | -1.54891000 | 1.67375600  | -1.98366600 |
| H | -0.82889700 | 0.08898400  | -1.77923500 |
| C | 3.08814800  | 2.67950400  | 1.13193100  |
| H | 3.09146600  | 3.41070400  | 0.31156300  |
| H | 3.38333200  | 3.20003800  | 2.05048800  |
| H | 3.84952200  | 1.92174000  | 0.92122500  |
| H | 1.59795400  | 2.16163800  | -1.05333000 |

#### S-TS12-26

|   |             |             |             |
|---|-------------|-------------|-------------|
| C | -0.65520600 | 0.25894200  | -0.67771100 |
| N | -0.77626900 | 1.92971100  | 0.39906400  |
| N | 0.68810000  | -0.05458000 | -0.65163400 |
| H | 1.21937500  | 0.57292200  | -1.24629800 |
| C | 2.90365200  | -0.33496800 | 0.29233500  |
| C | 3.47419100  | -1.27914800 | -0.56652300 |
| C | 3.71584200  | 0.64838400  | 0.85732800  |
| C | 4.83434200  | -1.23989900 | -0.85255200 |
| H | 2.84123000  | -2.04634100 | -1.01090700 |
| C | 5.08028600  | 0.68749900  | 0.57524900  |
| H | 3.27846400  | 1.38635800  | 1.52970400  |
| C | 5.64024900  | -0.25567400 | -0.28089500 |
| H | 5.26862500  | -1.97957900 | -1.52083000 |

|   |             |             |             |
|---|-------------|-------------|-------------|
| H | 5.70417300  | 1.45631300  | 1.02443200  |
| H | 6.70409100  | -0.22658700 | -0.50329700 |
| C | 1.42857700  | -0.37057700 | 0.57478900  |
| H | 1.18987400  | 0.34714500  | 1.37681400  |
| H | 1.13817400  | -1.36513800 | 0.93127600  |
| H | -0.74030100 | 1.74107600  | 1.39815800  |
| N | -1.61408600 | -0.54843100 | -0.21115300 |
| C | -2.85254500 | -2.09954700 | 1.04299800  |
| C | -3.50696800 | -1.91161100 | -0.32067400 |
| C | -2.99881500 | -0.54875600 | -0.75916900 |
| C | -1.44002800 | -1.57471000 | 0.82296200  |
| H | -3.37559500 | -1.48343800 | 1.78455400  |
| H | -2.85455100 | -3.13524800 | 1.39540600  |
| H | -4.59761000 | -1.92327200 | -0.27451400 |
| H | -3.16439600 | -2.68794300 | -1.01903400 |
| H | -2.92921300 | -0.45898400 | -1.85249100 |
| H | -0.77478800 | -2.36786100 | 0.44844700  |
| H | -0.99862100 | -1.15143600 | 1.73512200  |
| C | -3.84575500 | 0.66253500  | -0.26058800 |
| O | -4.92931300 | 0.42124000  | 0.29244500  |
| O | -3.33369300 | 1.79190600  | -0.51481900 |
| H | -1.76228000 | 2.12936900  | 0.14132100  |
| H | -0.94755900 | 0.79632300  | -1.58144800 |
| C | 0.15576400  | 2.97030700  | -0.00542600 |
| H | 0.06939700  | 3.12491900  | -1.08719400 |
| H | -0.03816400 | 3.93091200  | 0.48601100  |
| H | 1.18799300  | 2.67176000  | 0.21708000  |

#### S-TS14-27

|   |             |             |             |
|---|-------------|-------------|-------------|
| N | 0.34656600  | 0.61194000  | 0.47874800  |
| H | 0.84503100  | 0.85175300  | 1.33159700  |
| H | -0.40548000 | -1.10238500 | -0.64848700 |
| C | 2.56970700  | 0.11711000  | -0.36358200 |
| C | 3.66167900  | 0.92126600  | -0.03423900 |
| C | 2.72313600  | -1.27230900 | -0.35530000 |
| C | 4.89116400  | 0.35257100  | 0.29306400  |
| H | 3.54580400  | 2.00562100  | -0.03938200 |
| C | 3.94984900  | -1.84278200 | -0.03223100 |
| H | 1.87419100  | -1.91001000 | -0.60116700 |
| C | 5.03665700  | -1.03162500 | 0.29250100  |
| H | 5.73497800  | 0.99084700  | 0.54476100  |
| H | 4.05901800  | -2.92471400 | -0.03455700 |
| H | 5.99540600  | -1.47991000 | 0.54254500  |
| C | 1.24221700  | 0.74849700  | -0.67391500 |
| H | 0.78143100  | 0.26662100  | -1.55136500 |
| H | 1.40949400  | 1.80069400  | -0.96234200 |
| C | -4.20671300 | -0.08282600 | -0.50505700 |
| C | -3.78223000 | -0.69818800 | 0.82004000  |
| C | -2.26705700 | -0.75121700 | 0.66162600  |
| C | -3.17107200 | 1.01376500  | -0.66825500 |
| H | -4.12268600 | -0.82551200 | -1.31149300 |
| H | -5.23011100 | 0.30445100  | -0.50674200 |
| H | -4.20557600 | -1.68425900 | 1.02644800  |

|   |             |             |             |
|---|-------------|-------------|-------------|
| H | -4.04315900 | -0.02378500 | 1.64652600  |
| H | -1.74862000 | -0.67252800 | 1.63100900  |
| H | -3.43420400 | 1.87568800  | -0.03294600 |
| H | -3.07348300 | 1.37991000  | -1.69582300 |
| N | -1.90886800 | 0.39627500  | -0.20591400 |
| C | -1.81082400 | -2.08921400 | 0.07730800  |
| O | -2.38384200 | -3.13604300 | 0.27431900  |
| O | -0.68880900 | -2.03751300 | -0.64226500 |
| C | -0.94650100 | 1.30598800  | 0.40552100  |
| N | -0.96385500 | 2.57166600  | -0.27938400 |
| H | -1.22920100 | 1.52298200  | 1.45912900  |
| H | -0.71394100 | 2.46667100  | -1.25926400 |
| C | -0.18823600 | 3.60653700  | 0.37704800  |
| H | -0.22766800 | 4.52386500  | -0.21688200 |
| H | -0.63217400 | 3.82563300  | 1.35613500  |
| H | 0.87460700  | 3.35221400  | 0.54453300  |

### S-TS27-28

|   |             |             |             |
|---|-------------|-------------|-------------|
| N | -0.35157100 | 0.80057800  | -0.82370400 |
| H | -0.86107000 | 1.27640200  | -1.56162100 |
| H | 2.89580100  | 0.59511000  | 1.10800900  |
| C | -2.49917600 | 0.11007200  | 0.13087100  |
| C | -3.65572200 | 0.65075100  | 0.69544100  |
| C | -2.60726900 | -1.04731700 | -0.64605600 |
| C | -4.89528600 | 0.04649000  | 0.49950700  |
| H | -3.58372600 | 1.55685400  | 1.29643800  |
| C | -3.84444900 | -1.65204300 | -0.84510400 |
| H | -1.71240700 | -1.46922500 | -1.09999400 |
| C | -4.99273300 | -1.10776900 | -0.27234800 |
| H | -5.78630100 | 0.48218500  | 0.94591600  |
| H | -3.91264300 | -2.55335600 | -1.45019400 |
| H | -5.95951000 | -1.58035300 | -0.42962100 |
| C | -1.16275400 | 0.75528600  | 0.38732700  |
| H | -0.62450100 | 0.17673300  | 1.15547000  |
| H | -1.33464000 | 1.75046200  | 0.83555300  |
| C | 3.49804400  | -1.33134000 | -1.38042000 |
| C | 2.37877500  | -2.09480500 | -0.68103000 |
| C | 1.64196300  | -1.00085800 | 0.11352700  |
| C | 2.80509000  | -0.03033000 | -1.72965200 |
| H | 4.33305100  | -1.14341700 | -0.69140600 |
| H | 3.89257300  | -1.85339600 | -2.25725900 |
| H | 2.71589000  | -2.91401200 | -0.03888900 |
| H | 1.69171900  | -2.51459000 | -1.42641500 |
| H | 0.56200900  | -1.19149100 | 0.08812200  |
| H | 2.14947900  | -0.16987300 | -2.61081200 |
| H | 3.49156300  | 0.79816700  | -1.94244200 |
| N | 2.01071100  | 0.26306300  | -0.53067100 |
| C | 2.06854500  | -0.99660700 | 1.57919900  |
| O | 1.77097100  | -1.87697000 | 2.35468900  |
| O | 2.80744500  | 0.05545800  | 1.93464900  |
| C | 1.00960400  | 1.32271100  | -0.71597900 |
| N | 1.23544700  | 2.38013800  | 0.25347500  |
| H | 1.22669400  | 1.77477000  | -1.69602600 |

|   |             |            |             |
|---|-------------|------------|-------------|
| H | 1.02420200  | 2.07438500 | 1.20091900  |
| C | 0.54805300  | 3.61986900 | -0.06363900 |
| H | 0.75113900  | 4.35995200 | 0.71543400  |
| H | 0.94204400  | 4.01733800 | -1.00783300 |
| H | -0.54690700 | 3.52834000 | -0.17161300 |

**S-TS28-29**

|   |             |             |             |
|---|-------------|-------------|-------------|
| N | -0.64523700 | 0.72513500  | -0.84681700 |
| H | -1.14450900 | 1.52429200  | -1.23108500 |
| H | 3.39904200  | 0.21459600  | -0.90506400 |
| C | -2.68746200 | 0.09755600  | 0.32995500  |
| C | -3.56699100 | 0.66786700  | 1.25001500  |
| C | -3.20456500 | -0.71022500 | -0.68777700 |
| C | -4.93851100 | 0.43428300  | 1.16279800  |
| H | -3.17420600 | 1.30333300  | 2.04328800  |
| C | -4.57230700 | -0.94441300 | -0.77820700 |
| H | -2.51959300 | -1.14688000 | -1.41333800 |
| C | -5.44430900 | -0.37259800 | 0.14823900  |
| H | -5.61180700 | 0.88752900  | 1.88676800  |
| H | -4.96143200 | -1.57629400 | -1.57354600 |
| H | -6.51398800 | -0.55473400 | 0.07634500  |
| C | -1.20361100 | 0.32735800  | 0.43665300  |
| H | -0.71478400 | -0.61245400 | 0.73698100  |
| H | -1.01701000 | 1.04826400  | 1.25645200  |
| C | 1.97658700  | -2.56169000 | -0.71619500 |
| C | 1.92966400  | -2.12932100 | 0.74757000  |
| C | 2.00798400  | -0.59367000 | 0.67752400  |
| C | 1.14326200  | -1.48395600 | -1.38810800 |
| H | 3.00792800  | -2.53898700 | -1.09392400 |
| H | 1.58082400  | -3.56885200 | -0.87785500 |
| H | 2.72274400  | -2.55300100 | 1.37132200  |
| H | 0.96918900  | -2.42213600 | 1.19145300  |
| H | 1.41101700  | -0.13290100 | 1.47495400  |
| H | 0.06524000  | -1.68291300 | -1.26357700 |
| H | 1.33497500  | -1.37740600 | -2.46408300 |
| N | 1.55199600  | -0.26960200 | -0.67911300 |
| C | 3.44006100  | -0.11620000 | 0.90660800  |
| O | 3.96342400  | -0.12342300 | 1.99824100  |
| O | 4.08699700  | 0.25206300  | -0.19835600 |
| C | 0.79020900  | 0.94834100  | -0.92702000 |
| N | 1.32846900  | 2.01542600  | -0.09686500 |
| H | 0.97082200  | 1.22392000  | -1.98100500 |
| H | 0.70782900  | 2.22087400  | 0.67926200  |
| C | 1.67479300  | 3.22850800  | -0.81749000 |
| H | 2.02663600  | 3.98567500  | -0.11121700 |
| H | 2.50124800  | 3.02150000  | -1.50849300 |
| H | 0.84104300  | 3.65970700  | -1.40053300 |

**S-TS29-30**

|   |             |            |             |
|---|-------------|------------|-------------|
| N | -0.31618300 | 1.06576400 | -0.89008700 |
| H | -0.71536500 | 1.55163700 | -1.68501200 |
| H | 2.48805200  | 0.37269700 | 1.37619600  |
| C | -2.51314300 | 0.48670800 | 0.04705700  |



|   |             |             |             |
|---|-------------|-------------|-------------|
| C | -3.63562500 | 0.93919200  | 0.74563200  |
| C | -2.65623900 | -0.59934100 | -0.82005800 |
| C | -4.87003200 | 0.31528200  | 0.59538600  |
| H | -3.53740500 | 1.79248500  | 1.41660900  |
| C | -3.89156800 | -1.22429300 | -0.97416200 |
| H | -1.79188700 | -0.94922300 | -1.38207700 |
| C | -5.00184600 | -0.77168400 | -0.26645900 |
| H | -5.73232100 | 0.68135000  | 1.14811700  |
| H | -3.98580400 | -2.06988000 | -1.65197800 |
| H | -5.96626100 | -1.25905200 | -0.38929200 |
| C | -1.18159500 | 1.15573800  | 0.27815300  |
| H | -0.67011100 | 0.67884000  | 1.12730500  |
| H | -1.36542100 | 2.19393600  | 0.60692800  |
| C | 3.14815100  | -1.70046200 | -1.25111400 |
| C | 1.80377900  | -2.22417000 | -0.76222600 |
| C | 1.27543300  | -1.05747500 | 0.07998500  |
| C | 2.80696100  | -0.25827700 | -1.57112000 |
| H | 3.89669100  | -1.74859100 | -0.44762500 |
| H | 3.54211800  | -2.24455200 | -2.11479900 |
| H | 1.85074200  | -3.15590800 | -0.19171900 |
| H | 1.13210700  | -2.37857900 | -1.61741800 |
| H | 0.18189300  | -1.00895100 | 0.00838200  |
| H | 2.28356500  | -0.20383400 | -2.54437800 |
| H | 3.68077700  | 0.40492300  | -1.62213000 |
| N | 1.91295300  | 0.14531800  | -0.47503300 |
| C | 1.60382700  | -1.24468500 | 1.55956300  |
| O | 1.22946700  | -2.20617500 | 2.19320700  |
| O | 2.32810100  | -0.26995300 | 2.10547100  |
| C | 1.09373700  | 1.33775300  | -0.75505200 |
| N | 1.37027600  | 2.34031100  | 0.26488100  |
| H | 1.43204600  | 1.69377600  | -1.74934400 |
| H | 0.68591500  | 3.08820300  | 0.18381100  |
| C | 2.70776800  | 2.90458300  | 0.16193900  |
| H | 2.82934400  | 3.70123100  | 0.90095000  |
| H | 3.46373200  | 2.13961500  | 0.37465700  |
| H | 2.93008700  | 3.31592100  | -0.84009200 |

#### S-TS30-31

|   |             |             |             |
|---|-------------|-------------|-------------|
| N | 0.17163000  | -1.72565000 | -0.93774300 |
| H | 0.23909900  | -2.57641300 | -1.47766300 |
| H | -1.96338900 | -1.79775600 | 0.81409400  |
| C | 2.27453200  | -0.80126300 | 0.04335100  |
| C | 3.23770700  | -0.79608400 | 1.05666600  |
| C | 2.47621500  | -0.00088300 | -1.08046300 |
| C | 4.37902800  | -0.00936500 | 0.94866300  |
| H | 3.08380800  | -1.41287700 | 1.94218400  |
| C | 3.62076500  | 0.78804800  | -1.19153000 |
| H | 1.72732200  | 0.00577000  | -1.87040300 |
| C | 4.57562200  | 0.78636900  | -0.17967800 |
| H | 5.11715700  | -0.01537400 | 1.74738200  |
| H | 3.76327500  | 1.40839200  | -2.07374200 |
| H | 5.46683400  | 1.40338400  | -0.26530300 |
| C | 1.04307200  | -1.65668400 | 0.22805300  |

|   |             |             |             |
|---|-------------|-------------|-------------|
| H | 0.45621100  | -1.31046000 | 1.09341600  |
| H | 1.35531500  | -2.68096900 | 0.47102800  |
| C | -2.20188200 | 2.37540500  | -0.87087900 |
| C | -0.90768400 | 2.44224700  | -0.06834100 |
| C | -0.70184000 | 1.00452100  | 0.37930800  |
| C | -2.02984600 | 1.09666400  | -1.67170800 |
| H | -3.05060100 | 2.28534400  | -0.18072500 |
| H | -2.37049500 | 3.24537800  | -1.51249600 |
| H | -0.96773400 | 3.11304300  | 0.79095500  |
| H | -0.07274900 | 2.75222900  | -0.71430900 |
| H | 0.36363000  | 0.79336200  | 0.53380500  |
| H | -1.48827100 | 1.28653100  | -2.61244500 |
| H | -2.98026500 | 0.60870000  | -1.92184100 |
| N | -1.20314500 | 0.24494900  | -0.79546700 |
| C | -1.45524800 | 0.61618000  | 1.68926800  |
| O | -2.01831000 | 1.51912500  | 2.32468500  |
| O | -1.39047200 | -0.61579900 | 1.98638000  |
| C | -1.00412900 | -1.04641200 | -1.13650000 |
| N | -2.30638200 | -2.05600700 | -0.13102800 |
| H | -1.44330000 | -1.28351500 | -2.10825600 |
| H | -2.20460100 | -3.05532000 | -0.29482600 |
| C | -3.68548400 | -1.60316700 | -0.28530500 |
| H | -4.37579400 | -2.15177700 | 0.36459100  |
| H | -3.73180400 | -0.54553900 | -0.00462100 |
| H | -4.01307300 | -1.71525100 | -1.32511200 |

#### S-TS22-32

|   |             |             |             |
|---|-------------|-------------|-------------|
| N | -0.68462400 | -0.08051500 | -0.05684100 |
| H | -0.78870800 | 0.37920200  | 0.84199200  |
| C | -3.10492900 | -0.40367600 | -0.21390000 |
| C | -4.10863700 | -1.08646400 | 0.47342100  |
| C | -3.39117400 | 0.84964600  | -0.76365600 |
| C | -5.38070500 | -0.53368400 | 0.60599900  |
| H | -3.89203400 | -2.06139100 | 0.90868200  |
| C | -4.65859700 | 1.40603300  | -0.62779100 |
| H | -2.61083700 | 1.38798200  | -1.29921600 |
| C | -5.65748400 | 0.71473700  | 0.05641800  |
| H | -6.15362500 | -1.07694700 | 1.14439500  |
| H | -4.86953400 | 2.38156900  | -1.05983700 |
| H | -6.64800100 | 1.15075700  | 0.16245100  |
| C | -1.74639800 | -1.02613100 | -0.37992300 |
| H | -1.58904700 | -1.33953900 | -1.42205000 |
| H | -1.67096000 | -1.93828300 | 0.23042100  |
| C | 2.98779800  | 1.85081000  | 1.18307300  |
| C | 3.45785000  | 1.80832500  | -0.26940100 |
| C | 2.90698600  | 0.46513100  | -0.74082300 |
| C | 1.57375900  | 1.27303100  | 1.12166100  |
| H | 3.63066300  | 1.20682900  | 1.79736400  |
| H | 3.00617400  | 2.85314600  | 1.61939000  |
| H | 4.54219100  | 1.86042300  | -0.38281300 |
| H | 2.99773800  | 2.61856400  | -0.84898300 |
| H | 2.78933100  | 0.42095500  | -1.83218900 |
| H | 0.81420900  | 2.06466800  | 1.03987600  |

|   |            |             |             |
|---|------------|-------------|-------------|
| H | 1.33719800 | 0.65227800  | 1.99955300  |
| N | 1.58593300 | 0.46735600  | -0.10312000 |
| C | 3.85878100 | -0.68486200 | -0.33729200 |
| O | 5.03922200 | -0.55516800 | -0.63670600 |
| O | 3.37310900 | -1.71124200 | 0.28132100  |
| C | 0.59239000 | -0.37400800 | -0.43786500 |
| H | 0.68045600 | -0.82818400 | -1.42579400 |
| O | 0.99281900 | -2.00171300 | 0.35589600  |
| H | 2.22563100 | -1.85529900 | 0.35596500  |
| H | 0.67094500 | -1.99295400 | 1.26690300  |

**S-TS32-33**

|   |             |             |             |
|---|-------------|-------------|-------------|
| N | 0.66915800  | -0.81858300 | -0.46916800 |
| H | 1.02202700  | -1.43187400 | -1.19815100 |
| C | 2.92324500  | -0.31570400 | 0.36804600  |
| C | 4.01725500  | -0.93371200 | 0.97494600  |
| C | 3.15184300  | 0.73134700  | -0.52952500 |
| C | 5.31621700  | -0.51139600 | 0.70095300  |
| H | 3.84927000  | -1.75770000 | 1.66764500  |
| C | 4.44853700  | 1.15261900  | -0.80798300 |
| H | 2.30310100  | 1.20784400  | -1.01763900 |
| C | 5.53501600  | 0.53355700  | -0.19213600 |
| H | 6.15777300  | -1.00580400 | 1.18069500  |
| H | 4.61260200  | 1.96591400  | -1.51136300 |
| H | 6.54810600  | 0.86134800  | -0.41285400 |
| C | 1.52530200  | -0.75509900 | 0.70604300  |
| H | 1.07576600  | -0.02987100 | 1.40459800  |
| H | 1.56300100  | -1.71654500 | 1.25007500  |
| C | -2.17798900 | 2.42584700  | -0.26782200 |
| C | -2.91377100 | 1.75882800  | 0.89054900  |
| C | -2.70383100 | 0.25789500  | 0.65540500  |
| C | -0.98602100 | 1.51072400  | -0.47183800 |
| H | -2.80197700 | 2.43105700  | -1.17139500 |
| H | -1.88508000 | 3.45785900  | -0.05520100 |
| H | -3.97786500 | 2.00053900  | 0.94166400  |
| H | -2.45677200 | 2.04991300  | 1.84333300  |
| H | -2.38015800 | -0.23884100 | 1.58420700  |
| H | -0.22709100 | 1.65228300  | 0.31233600  |
| H | -0.49519200 | 1.59724000  | -1.44424600 |
| N | -1.58659800 | 0.16709700  | -0.33372400 |
| C | -3.97424300 | -0.49431600 | 0.23818800  |
| O | -5.06745600 | -0.08203200 | 0.55353800  |
| O | -3.83286200 | -1.65344800 | -0.38997900 |
| C | -0.69650400 | -1.10839700 | -0.22899700 |
| H | -0.86236800 | -1.53854900 | 0.78262700  |
| O | -1.31347700 | -1.76919900 | -1.25637000 |
| H | -2.90115600 | -1.87364100 | -0.68177900 |
| H | -1.80189600 | -0.54649000 | -1.32680700 |

**S-TS25-34**

|   |            |             |             |
|---|------------|-------------|-------------|
| C | 3.40771700 | -1.20001300 | -0.43173100 |
| C | 2.18144600 | -1.55605800 | -1.26710500 |
| C | 1.09033300 | -0.70225800 | -0.62473400 |

|   |             |             |             |
|---|-------------|-------------|-------------|
| C | 3.24077600  | 0.29393800  | -0.15700900 |
| H | 3.38993600  | -1.76345100 | 0.50957500  |
| H | 4.35312200  | -1.42440300 | -0.93352400 |
| H | 1.92359500  | -2.61690300 | -1.24639900 |
| H | 2.31653300  | -1.24408700 | -2.31041300 |
| H | 0.23573500  | -0.58327400 | -1.29563300 |
| H | 3.85604700  | 0.91391000  | -0.82200900 |
| H | 3.49205900  | 0.55203700  | 0.88218700  |
| N | 1.81347800  | 0.56646400  | -0.42626000 |
| C | 0.55956800  | -1.40316000 | 0.64633400  |
| O | 0.09127000  | -2.52245700 | 0.49334000  |
| O | 0.66774500  | -0.81335000 | 1.79629300  |
| C | 1.32633700  | 1.75364600  | 0.00058900  |
| N | 0.17749900  | 2.30292700  | -0.48404000 |
| H | 0.84625100  | 0.30239500  | 1.82810100  |
| H | -0.08407500 | 3.15721000  | -0.01210800 |
| C | -1.83537600 | 0.77681000  | -0.66063300 |
| C | -2.01704600 | 0.74807800  | 0.72026300  |
| C | -2.61867600 | -0.05352800 | -1.46783100 |
| C | -2.96631400 | -0.10174400 | 1.28548500  |
| H | -1.39159300 | 1.36472200  | 1.36363700  |
| C | -3.57026500 | -0.89590200 | -0.90474300 |
| H | -2.47304800 | -0.04499300 | -2.54887700 |
| C | -3.74660300 | -0.92180600 | 0.47808400  |
| H | -3.08214400 | -0.13088800 | 2.36621700  |
| H | -4.16626300 | -1.54339500 | -1.54369500 |
| H | -4.47845000 | -1.59168500 | 0.92253400  |
| C | -0.83699900 | 1.69850400  | -1.32489000 |
| H | -1.37516800 | 2.53655700  | -1.78713700 |
| H | -0.34129200 | 1.18862500  | -2.16190600 |
| H | 2.11159600  | 2.48635400  | 0.18980400  |
| O | 0.97659100  | 1.57557100  | 1.82070600  |
| H | 1.75609900  | 1.81837800  | 2.33655900  |

#### S-TS34-35

|   |             |             |             |
|---|-------------|-------------|-------------|
| C | -0.76641100 | -2.11732800 | 1.54629400  |
| C | -0.86140200 | -2.09438800 | 0.02310100  |
| C | -1.32665400 | -0.67169100 | -0.30357400 |
| C | -0.27499100 | -0.71680200 | 1.85680000  |
| H | -1.75703000 | -2.27592800 | 1.99329400  |
| H | -0.09383200 | -2.89213400 | 1.92592300  |
| H | -1.54955900 | -2.83551000 | -0.39022800 |
| H | 0.12954400  | -2.26336700 | -0.41749100 |
| H | -0.72975800 | -0.22082300 | -1.11373600 |
| H | 0.79582600  | -0.61385700 | 1.62184000  |
| H | -0.44512100 | -0.38353800 | 2.88571500  |
| N | -1.06070400 | 0.12369900  | 0.92747700  |
| C | -2.77196800 | -0.57984900 | -0.79265900 |
| O | -3.31735600 | -1.51976400 | -1.32626900 |
| O | -3.38504400 | 0.59656100  | -0.69610800 |
| C | -0.66110900 | 1.63494200  | 0.73652600  |
| N | -0.16988300 | 1.97244400  | -0.54921700 |
| H | -2.88175000 | 1.29274800  | -0.19301400 |

|   |             |             |             |
|---|-------------|-------------|-------------|
| H | -0.74947900 | 2.70141800  | -0.95180900 |
| C | 2.07496200  | 0.97490000  | -0.52645400 |
| C | 1.97671400  | -0.03384500 | -1.49015000 |
| C | 2.91425300  | 0.77775900  | 0.56988900  |
| C | 2.68647100  | -1.22125900 | -1.34928800 |
| H | 1.33387600  | 0.11935400  | -2.35703000 |
| C | 3.63112700  | -0.41007900 | 0.71444700  |
| H | 3.00203600  | 1.56084400  | 1.32302600  |
| C | 3.51278500  | -1.41464000 | -0.24126500 |
| H | 2.59929100  | -1.99726700 | -2.10669800 |
| H | 4.28041100  | -0.54965800 | 1.57560300  |
| H | 4.06823800  | -2.34291300 | -0.13107000 |
| C | 1.26269000  | 2.23623500  | -0.66245700 |
| H | 1.42950700  | 2.68276600  | -1.65010600 |
| H | 1.60301100  | 2.97092400  | 0.08804900  |
| H | 0.09981100  | 1.81585100  | 1.52451300  |
| O | -1.91182800 | 2.11428000  | 1.01027000  |
| H | -1.98589200 | 0.84573900  | 1.33499900  |

#### S-TS26-36

|   |             |             |             |
|---|-------------|-------------|-------------|
| C | 0.59258200  | -0.37453600 | -0.43666100 |
| N | -0.68456700 | -0.08033700 | -0.05605300 |
| H | -0.78854100 | 0.38009900  | 0.84242800  |
| C | -3.10488200 | -0.40371100 | -0.21321500 |
| C | -4.10902000 | -1.08613500 | 0.47384900  |
| C | -3.39079200 | 0.84932000  | -0.76380700 |
| C | -5.38116900 | -0.53330000 | 0.60536100  |
| H | -3.89267500 | -2.06082200 | 0.90977900  |
| C | -4.65830400 | 1.40576900  | -0.62899700 |
| H | -2.61012100 | 1.38737500  | -1.29915900 |
| C | -5.65761100 | 0.71483700  | 0.05495600  |
| H | -6.15441500 | -1.07628100 | 1.14357500  |
| H | -4.86897300 | 2.38108500  | -1.06167500 |
| H | -6.64818700 | 1.15092100  | 0.16017100  |
| C | -1.74629000 | -1.02634100 | -0.37809300 |
| H | -1.58869700 | -1.34115500 | -1.41976800 |
| H | -1.67106000 | -1.93772900 | 0.23342700  |
| H | 0.67263900  | -1.98957900 | 1.26929700  |
| N | 1.58606400  | 0.46741700  | -0.10265000 |
| C | 2.98835800  | 1.85071700  | 1.18314000  |
| C | 3.45809700  | 1.80823300  | -0.26941900 |
| C | 2.90694000  | 0.46517900  | -0.74077700 |
| C | 1.57408800  | 1.27356400  | 1.12182300  |
| H | 3.63106200  | 1.20631500  | 1.79717400  |
| H | 3.00726500  | 2.85295700  | 1.61965900  |
| H | 4.54242000  | 1.86015600  | -0.38305100 |
| H | 2.99796600  | 2.61858800  | -0.84882700 |
| H | 2.78882600  | 0.42119900  | -1.83212300 |
| H | 0.81494000  | 2.06556000  | 1.03965000  |
| H | 1.33714100  | 0.65338300  | 2.00001100  |
| C | 3.85859400  | -0.68525900 | -0.33816100 |
| O | 5.03938500  | -0.55485500 | -0.63596200 |
| O | 3.37229900  | -1.71315500 | 0.27732000  |

|   |            |             |             |
|---|------------|-------------|-------------|
| H | 2.22446500 | -1.85617600 | 0.35430400  |
| H | 0.68051500 | -0.82858700 | -1.42470200 |
| O | 0.99224300 | -2.00035100 | 0.35748600  |

**S-TS36-37**

|   |             |             |             |
|---|-------------|-------------|-------------|
| C | 0.59376600  | -0.74662400 | -0.16024700 |
| N | -0.71130800 | -0.22513700 | 0.07122700  |
| H | -0.91046600 | -0.28068300 | 1.07107100  |
| C | -3.11453300 | -0.40333500 | -0.35510500 |
| C | -4.09958900 | -1.20754400 | 0.21725800  |
| C | -3.41492600 | 0.93199900  | -0.64194000 |
| C | -5.36557700 | -0.69329800 | 0.49421400  |
| H | -3.87205000 | -2.24772000 | 0.44783700  |
| C | -4.67550700 | 1.44911900  | -0.36584200 |
| H | -2.64592600 | 1.56492000  | -1.08291000 |
| C | -5.65589900 | 0.63594700  | 0.20357200  |
| H | -6.12346700 | -1.33357500 | 0.93964200  |
| H | -4.89769600 | 2.48856900  | -0.59718700 |
| H | -6.64249400 | 1.03985500  | 0.41842500  |
| C | -1.75188300 | -0.95911600 | -0.65876000 |
| H | -1.53367500 | -0.85265600 | -1.73165200 |
| H | -1.73285000 | -2.03817500 | -0.43054600 |
| H | 1.69259800  | -0.72872800 | 1.08590100  |
| N | 1.68531100  | 0.23152400  | 0.31215500  |
| C | 2.71413900  | 2.28674200  | 0.76828000  |
| C | 3.36160900  | 1.75573400  | -0.50560800 |
| C | 2.89698400  | 0.30087600  | -0.57654100 |
| C | 1.35736000  | 1.61070000  | 0.74239300  |
| H | 3.28165500  | 1.96630000  | 1.65246000  |
| H | 2.63807500  | 3.37723100  | 0.79326700  |
| H | 4.45209400  | 1.81590900  | -0.51022000 |
| H | 2.98426700  | 2.30607100  | -1.37529100 |
| H | 2.59036400  | 0.03414300  | -1.59851200 |
| H | 0.68688200  | 2.06192900  | -0.00078100 |
| H | 0.83746300  | 1.58187200  | 1.70418300  |
| C | 3.98509900  | -0.71815800 | -0.20344700 |
| O | 5.15801500  | -0.42620000 | -0.26356500 |
| O | 3.59355800  | -1.94716800 | 0.09597600  |
| H | 2.60125700  | -2.05763400 | 0.20582100  |
| H | 0.70821800  | -0.92304000 | -1.24463500 |
| O | 1.00861000  | -1.78632700 | 0.64510000  |

**S-TS31-38**

|   |             |             |             |
|---|-------------|-------------|-------------|
| N | -0.04119100 | 2.11573500  | -0.16547000 |
| H | -0.04217600 | 3.12431000  | -0.09887300 |
| C | -2.02326200 | 0.66443100  | 0.31783900  |
| C | -2.59393300 | -0.31532700 | 1.13424200  |
| C | -2.54844100 | 0.87615600  | -0.95675500 |
| C | -3.68022500 | -1.06225300 | 0.68945600  |
| H | -2.17066000 | -0.50408100 | 2.12099300  |
| C | -3.63559500 | 0.12775500  | -1.40361900 |
| H | -2.09256500 | 1.62332900  | -1.60326300 |
| C | -4.20665400 | -0.84034300 | -0.58167900 |

|   |             |             |             |
|---|-------------|-------------|-------------|
| H | -4.10862600 | -1.82663800 | 1.33328000  |
| H | -4.03602800 | 0.30008600  | -2.40028400 |
| H | -5.05279600 | -1.42644200 | -0.93230000 |
| C | -0.87915300 | 1.48634700  | 0.85714800  |
| H | -0.26643800 | 0.88657000  | 1.54290300  |
| H | -1.28383800 | 2.29650700  | 1.47674900  |
| C | 2.88478700  | -1.42650000 | -1.43345200 |
| C | 1.45159800  | -1.89908200 | -1.20665900 |
| C | 0.90048100  | -0.83294400 | -0.26270700 |
| C | 2.76099900  | 0.09546100  | -1.49820100 |
| H | 3.51052200  | -1.71909800 | -0.58059800 |
| H | 3.34078600  | -1.84244600 | -2.33622900 |
| H | 1.37747300  | -2.89725000 | -0.76974600 |
| H | 0.88101600  | -1.87984900 | -2.14330200 |
| H | -0.19516700 | -0.80599900 | -0.29907400 |
| H | 2.73582500  | 0.47020500  | -2.53058400 |
| H | 3.58600900  | 0.59727800  | -0.97272600 |
| N | 1.46989000  | 0.38525400  | -0.84816000 |
| C | 1.31143700  | -1.13555900 | 1.19318400  |
| O | 0.97035600  | -2.21744100 | 1.65234800  |
| O | 1.98662400  | -0.24868800 | 1.85923500  |
| C | 1.20337800  | 1.66789200  | -0.51588300 |
| H | 1.73951200  | 2.38350900  | -1.13923700 |
| O | 2.18864800  | 1.99470100  | 1.01069900  |
| H | 2.13895400  | 0.81217500  | 1.44920200  |
| H | 3.09977800  | 2.23613400  | 0.80275600  |

#### S-TS38-39

|   |             |             |             |
|---|-------------|-------------|-------------|
| N | 0.21668300  | 2.08482000  | -0.59511800 |
| H | 0.29521000  | 2.74827500  | -1.35188300 |
| C | -1.97098800 | 0.99142300  | -0.10076000 |
| C | -2.46700900 | 0.24126100  | 0.96465800  |
| C | -2.33319100 | 0.63203000  | -1.40328000 |
| C | -3.28875500 | -0.86239800 | 0.73756200  |
| H | -2.18869000 | 0.50816100  | 1.98340200  |
| C | -3.15504600 | -0.46543200 | -1.63504300 |
| H | -1.95034100 | 1.21087000  | -2.24386000 |
| C | -3.63011500 | -1.22080700 | -0.56250600 |
| H | -3.64838000 | -1.44945700 | 1.57913100  |
| H | -3.42427600 | -0.73586200 | -2.65377200 |
| H | -4.26269200 | -2.08663400 | -0.74275000 |
| C | -1.04653900 | 2.16050400  | 0.14081600  |
| H | -0.82779200 | 2.25257500  | 1.21183900  |
| H | -1.54997800 | 3.09084900  | -0.15403800 |
| C | 3.18473700  | -1.35001400 | -1.14551300 |
| C | 1.69969500  | -1.69129300 | -1.20659900 |
| C | 1.06073500  | -0.71933800 | -0.21246200 |
| C | 3.14903300  | 0.15900900  | -1.00186300 |
| H | 3.64799200  | -1.80132800 | -0.25764600 |
| H | 3.74489600  | -1.67907300 | -2.02564300 |
| H | 1.46641000  | -2.72661900 | -0.94707400 |
| H | 1.31067500  | -1.49468500 | -2.21318100 |
| H | 0.13175000  | -0.28966500 | -0.62254100 |

|   |            |             |             |
|---|------------|-------------|-------------|
| H | 2.89234300 | 0.63508600  | -1.96247100 |
| H | 4.06984600 | 0.61278900  | -0.62152100 |
| N | 2.04451400 | 0.38797900  | -0.05051700 |
| C | 0.66863600 | -1.36747000 | 1.11775000  |
| O | 0.47810500 | -2.55806600 | 1.21720800  |
| O | 0.47996200 | -0.55861200 | 2.15851500  |
| C | 1.44744200 | 1.85747000  | 0.05694100  |
| H | 2.22793000 | 2.47321900  | -0.42803500 |
| O | 1.47452900 | 1.86799800  | 1.42328200  |
| H | 0.67651000 | 0.39687200  | 1.96992000  |
| H | 2.18763200 | 0.82478700  | 1.10932300  |

**T-IM1**

|   |             |             |             |
|---|-------------|-------------|-------------|
| C | 1.56455000  | 2.39672800  | 0.29847900  |
| C | 1.89556700  | 1.49777800  | -0.89854800 |
| C | 0.97465500  | 0.27514300  | -0.76476500 |
| C | 0.15535200  | 1.98093500  | 0.67006700  |
| H | 2.24269100  | 2.19577200  | 1.13730300  |
| H | 1.63366500  | 3.46323600  | 0.06780300  |
| H | 2.94108000  | 1.18012600  | -0.91912300 |
| H | 1.69530300  | 2.01255900  | -1.84376600 |
| H | 0.22418400  | 0.27837000  | -1.56800300 |
| H | -0.58415900 | 2.36987700  | -0.04170200 |
| H | -0.15498700 | 2.21945000  | 1.69273200  |
| N | 0.18466000  | 0.50614400  | 0.49696900  |
| C | 1.66808200  | -1.09997700 | -0.79757500 |
| O | 2.76176900  | -1.18497600 | -1.33888200 |
| O | 1.00556400  | -2.08399800 | -0.28961100 |
| H | -0.06703400 | -1.83404200 | 0.19189500  |
| C | -1.27489300 | -0.19379900 | 0.56001300  |
| N | -1.99852600 | 0.19998400  | -0.60707000 |
| O | -1.06221500 | -1.49431400 | 0.75153500  |
| H | 0.67140900  | 0.09696700  | 1.31507600  |
| O | 0.44358600  | -0.84431600 | 2.98533600  |
| H | 1.10137100  | -1.40801500 | 3.40457700  |
| H | -0.14925400 | -1.43497900 | 2.48092700  |
| C | -2.28141100 | -0.85822000 | -1.56788400 |
| H | -2.62497200 | -0.39660100 | -2.49998500 |
| H | -1.38894300 | -1.44914300 | -1.78824000 |
| H | -3.06038800 | -1.54917800 | -1.20774500 |
| C | -3.17169900 | 1.02110700  | -0.34926000 |
| H | -2.93322800 | 1.83735100  | 0.34069100  |
| H | -3.51536100 | 1.46972700  | -1.28760300 |
| H | -4.00642700 | 0.43738400  | 0.07733100  |
| H | -1.69873100 | 0.31089800  | 1.44835400  |

**T-5a**

|   |             |             |             |
|---|-------------|-------------|-------------|
| C | -2.36049700 | -1.59681700 | -0.01556000 |
| C | -2.14447200 | -0.67132700 | -1.21297300 |
| C | -0.93801300 | 0.16076900  | -0.76864700 |
| C | -0.94809000 | -1.85956000 | 0.52425200  |
| H | -2.96619500 | -1.08639300 | 0.74467200  |
| H | -2.88483900 | -2.51991500 | -0.27909900 |



|   |             |             |             |
|---|-------------|-------------|-------------|
| H | -3.01332600 | -0.05334900 | -1.45339200 |
| H | -1.86083700 | -1.24267500 | -2.10419800 |
| H | -0.41481500 | 0.60048900  | -1.62802500 |
| H | -0.57171700 | -2.86077600 | 0.26111300  |
| H | -0.92980800 | -1.78156800 | 1.62517100  |
| N | -0.12383900 | -0.84194100 | -0.12193600 |
| C | -1.41956700 | 1.32363100  | 0.11466300  |
| O | -2.23171000 | 2.12489000  | -0.29180000 |
| O | -0.93449300 | 1.41571700  | 1.35454500  |
| H | -0.19908800 | 0.78390700  | 1.52989900  |
| C | 1.23656800  | -0.73248400 | 0.25752300  |
| N | 2.04779200  | 0.00872800  | -0.66021100 |
| O | 1.36299500  | -0.15250400 | 1.60209400  |
| H | 1.38792000  | -0.85479200 | 2.26220500  |
| H | 1.63709900  | -1.75637000 | 0.32088700  |
| C | 3.42444600  | -0.46506800 | -0.67338800 |
| H | 3.45787500  | -1.53657900 | -0.89589900 |
| H | 3.97413300  | 0.05802700  | -1.46300400 |
| H | 3.94508500  | -0.28070000 | 0.28450800  |
| C | 2.03234900  | 1.45903200  | -0.49879100 |
| H | 1.01548700  | 1.85381100  | -0.44461700 |
| H | 2.57033900  | 1.78544100  | 0.40618500  |
| H | 2.51433600  | 1.91005100  | -1.37255800 |

#### T-5b

|   |             |             |             |
|---|-------------|-------------|-------------|
| C | 0.91419500  | 2.47353700  | -0.31305400 |
| C | 2.05814700  | 1.48324500  | -0.46548500 |
| C | 1.34675400  | 0.13199000  | -0.49288700 |
| C | 0.01280500  | 1.73449000  | 0.66160900  |
| H | 1.23541700  | 3.45364200  | 0.05419900  |
| H | 0.39520600  | 2.62360300  | -1.27125600 |
| H | 2.72294300  | 1.52304500  | 0.40591700  |
| H | 2.67349300  | 1.63481100  | -1.35761700 |
| H | 1.12201700  | -0.15264900 | -1.53711800 |
| H | -1.02503700 | 2.07608300  | 0.66910900  |
| H | 0.40807300  | 1.81775400  | 1.68462800  |
| N | 0.06922400  | 0.31519100  | 0.24480300  |
| C | 2.17919300  | -0.99507900 | 0.11578400  |
| O | 3.21147200  | -0.82573300 | 0.72091300  |
| O | 1.69519400  | -2.22570700 | -0.07922000 |
| H | 0.81875600  | -2.16597800 | -0.51705100 |
| C | -1.07288600 | -0.17306000 | -0.50054800 |
| O | -0.92542900 | -1.59814200 | -0.66642700 |
| H | -1.14461500 | -2.00477500 | 0.18588400  |
| N | -2.30698000 | 0.20393400  | 0.10523800  |
| H | -1.08546200 | 0.19564500  | -1.54510100 |
| C | -3.46201500 | -0.04307800 | -0.73933800 |
| H | -4.33876600 | 0.44374900  | -0.29834100 |
| H | -3.29998800 | 0.38301400  | -1.73513200 |
| H | -3.68651200 | -1.11829300 | -0.85374900 |
| C | -2.51523900 | -0.27384600 | 1.46290300  |
| H | -1.61797300 | -0.11279700 | 2.06713400  |
| H | -3.34316100 | 0.28329100  | 1.91471100  |

H -2.78571900 -1.34656900 1.50747700

**T-6a**

C -2.46674200 -1.21209400 -0.20917600  
C -2.52140700 0.22975800 -0.70012600  
C -1.06873400 0.69979800 -0.59847800  
C -1.19821900 -1.73052600 -0.85890900  
H -2.36641900 -1.24310300 0.88292200  
H -3.34443000 -1.80029200 -0.49213600  
H -3.17618800 0.87889400 -0.11311000  
H -2.85974800 0.26145300 -1.74452100  
H -0.85362000 1.45201700 -1.36187400  
H -1.37617300 -2.03252400 -1.89988500  
H -0.72399500 -2.55463800 -0.31591200  
N -0.30194500 -0.54860700 -0.84823900  
C -0.77362300 1.32631800 0.79888400  
O -1.23622700 2.47140200 0.92493500  
O -0.12582500 0.63733600 1.62839400  
H 0.40374400 -1.00360300 1.82245200  
C 0.98961700 -0.74244400 -0.70406400  
N 1.98734900 0.12564300 -0.69258500  
O 0.77296300 -1.91932200 1.80604500  
H 0.89108200 -2.17560900 2.72457400  
H 1.29200100 -1.78142700 -0.58240800  
C 3.27758100 -0.31641800 -0.17379500  
H 3.28047400 -1.40019800 -0.04473800  
H 4.07503900 -0.02170600 -0.86313900  
H 3.45370400 0.14658200 0.80467500  
C 1.86915500 1.56583700 -0.89427400  
H 1.12009600 1.78842300 -1.65350000  
H 1.61969000 2.07766000 0.04217700  
H 2.83385500 1.93212800 -1.25518900

**T-6b**

C 1.73212800 2.32636100 0.19546500  
C 2.47986500 1.00073000 0.16315200  
C 1.55395000 0.07262500 -0.61961300  
C 0.29550700 1.88847500 0.43015100  
H 2.08314300 3.00910700 0.97475700  
H 1.81342300 2.83977700 -0.77176900  
H 2.61065900 0.61158900 1.18252300  
H 3.46944000 1.05751700 -0.29513200  
H 1.76398300 0.13337900 -1.69733500  
H -0.45145700 2.61602000 0.09913300  
H 0.13239600 1.65656400 1.49211200  
N 0.20820800 0.65567300 -0.37160800  
C 1.69482400 -1.41230200 -0.18850700  
O 2.83290200 -1.86741500 -0.37696500  
O 0.67503500 -1.98167700 0.28248300  
H -0.63843100 -1.56412700 1.37708600  
C -0.84793800 0.00289000 -0.79776800  
O -1.42058100 -1.27279000 1.89924100  
H -1.43423000 -1.84328700 2.67253700

|   |             |             |             |
|---|-------------|-------------|-------------|
| N | -2.13209000 | 0.21704200  | -0.57107700 |
| H | -0.63085300 | -0.83423900 | -1.45795800 |
| C | -3.10852700 | -0.65919500 | -1.20880000 |
| H | -3.92322700 | -0.05742300 | -1.62427900 |
| H | -2.64256700 | -1.22523600 | -2.01719500 |
| H | -3.51289200 | -1.35562300 | -0.46472900 |
| C | -2.68860100 | 1.09944600  | 0.44865000  |
| H | -1.96641800 | 1.27955400  | 1.24078300  |
| H | -3.03297000 | 2.04164100  | 0.00725700  |
| H | -3.53891100 | 0.58665600  | 0.90654400  |

**T-7**

|   |             |             |             |
|---|-------------|-------------|-------------|
| N | 0.38919400  | 0.47724200  | -0.65855200 |
| H | -0.03759800 | -1.20169500 | -0.90977200 |
| H | 0.97566700  | 0.84516000  | -1.40437500 |
| C | 2.55115300  | 0.07768100  | 0.36611500  |
| C | 2.83772300  | -1.28884300 | 0.31894700  |
| C | 3.57907300  | 0.99538700  | 0.14092600  |
| C | 4.13102000  | -1.72867000 | 0.05546300  |
| H | 2.03934400  | -2.01150200 | 0.48470800  |
| C | 4.87509300  | 0.55781900  | -0.12447600 |
| H | 3.36008700  | 2.06320500  | 0.17951100  |
| C | 5.15216300  | -0.80586800 | -0.16621900 |
| H | 4.34314000  | -2.79465300 | 0.02397500  |
| H | 5.66785700  | 1.28280500  | -0.29378800 |
| H | 6.16325000  | -1.15050200 | -0.36982500 |
| C | 1.14796900  | 0.56029800  | 0.60094300  |
| H | 1.17528800  | 1.58557200  | 0.99564900  |
| H | 0.65560500  | -0.06367200 | 1.36064200  |
| C | -4.17454700 | -0.61430700 | -0.32823600 |
| C | -3.42406300 | -1.02566100 | 0.93463000  |
| C | -1.96004200 | -0.89664000 | 0.51571000  |
| C | -3.34549300 | 0.55902000  | -0.82153900 |
| H | -4.15270600 | -1.43324200 | -1.06008000 |
| H | -5.22005000 | -0.34982200 | -0.14394500 |
| H | -3.65508200 | -2.03435200 | 1.28413300  |
| H | -3.63852700 | -0.31842400 | 1.74688200  |
| H | -1.32954500 | -0.64257400 | 1.38548600  |
| H | -3.63647100 | 1.49053500  | -0.30358500 |
| H | -3.44183100 | 0.74083900  | -1.90178000 |
| N | -1.97988300 | 0.16310200  | -0.49472600 |
| C | -1.41408700 | -2.22884200 | -0.03081700 |
| O | -1.90348800 | -3.30154200 | 0.25508100  |
| O | -0.34249400 | -2.15078300 | -0.80928300 |
| C | -0.94348100 | 1.12295800  | -0.74337100 |
| N | -1.12340900 | 2.36826200  | -0.02095500 |
| C | -0.30091500 | 3.46561000  | -0.46378800 |
| H | 0.74371200  | 3.43048600  | -0.09557400 |
| H | -0.26638100 | 3.48712800  | -1.56084400 |
| H | -0.73483300 | 4.41463500  | -0.12440900 |
| C | -1.43973700 | 2.36523700  | 1.38797500  |
| H | -2.11364100 | 1.53427400  | 1.61828500  |
| H | -0.56350900 | 2.29171400  | 2.05724400  |

|   |             |            |             |
|---|-------------|------------|-------------|
| H | -1.96792200 | 3.29477100 | 1.64016900  |
| H | -1.03027900 | 1.40660000 | -1.80902000 |

**T-8**

|   |             |             |             |
|---|-------------|-------------|-------------|
| N | -0.33784100 | 0.45065900  | -0.58581800 |
| H | -0.83445200 | 0.77987500  | -1.41177000 |
| H | -0.18009900 | -1.31891400 | -0.34946700 |
| C | -2.57624400 | 0.10989100  | 0.32127200  |
| C | -3.52897500 | 0.94370800  | -0.27023200 |
| C | -2.92137700 | -1.21125300 | 0.61527400  |
| C | -4.80318800 | 0.46910400  | -0.56884700 |
| H | -3.26677800 | 1.98041900  | -0.48893500 |
| C | -4.19619500 | -1.68769100 | 0.32075300  |
| H | -2.18316100 | -1.86932000 | 1.07199000  |
| C | -5.13856600 | -0.85016800 | -0.27180100 |
| H | -5.53629100 | 1.13059900  | -1.02469100 |
| H | -4.45453100 | -2.71720400 | 0.55755500  |
| H | -6.13450900 | -1.22376500 | -0.49793700 |
| C | -1.19881500 | 0.64323600  | 0.59717600  |
| H | -0.73775200 | 0.11933000  | 1.44526300  |
| H | -1.27730400 | 1.70485600  | 0.86868600  |
| C | 4.21287700  | -0.50091700 | 0.20801400  |
| C | 3.60446800  | -1.33027400 | -0.91223100 |
| C | 2.10559300  | -1.11110400 | -0.73023700 |
| C | 3.31692200  | 0.71938500  | 0.19101300  |
| H | 4.12270500  | -1.02882800 | 1.16646400  |
| H | 5.26658900  | -0.25294500 | 0.04670900  |
| H | 3.86699300  | -2.39055500 | -0.87754700 |
| H | 3.91668600  | -0.92614100 | -1.88406000 |
| H | 1.59888900  | -1.02488400 | -1.70703600 |
| H | 3.57146600  | 1.36722600  | -0.66943200 |
| H | 3.39052700  | 1.32931000  | 1.09658700  |
| N | 1.96186400  | 0.15837800  | 0.03453000  |
| C | 1.43247000  | -2.25051300 | 0.03419200  |
| O | 2.03052900  | -3.16240600 | 0.55978100  |
| O | 0.10400100  | -2.17527500 | 0.07561200  |
| C | 1.00467700  | 1.08257200  | -0.54759900 |
| N | 1.11109400  | 2.37447300  | 0.07526200  |
| H | 1.25191400  | 1.25118100  | -1.62108200 |
| C | 0.45857700  | 3.45004200  | -0.62980000 |
| H | 0.83677800  | 4.41117100  | -0.26065900 |
| H | 0.68082400  | 3.39329600  | -1.70259700 |
| H | -0.64330700 | 3.45878800  | -0.50856100 |
| C | 1.09707100  | 2.51793400  | 1.51997800  |
| H | 1.32578500  | 1.56272300  | 2.00029100  |
| H | 1.85604500  | 3.25110500  | 1.83053500  |
| H | 0.12514800  | 2.86585700  | 1.90716300  |

**T-9**

|   |             |             |             |
|---|-------------|-------------|-------------|
| N | 0.35661800  | 0.61915600  | -0.70192000 |
| H | -1.01649200 | -1.43093900 | -1.49227300 |
| H | 0.92120500  | 1.05417500  | -1.42503200 |
| C | 2.50592500  | 0.16882100  | 0.30104900  |

|   |             |             |             |
|---|-------------|-------------|-------------|
| C | 2.74813200  | -1.15869400 | -0.06574700 |
| C | 3.57743800  | 1.05722600  | 0.38644400  |
| C | 4.04344500  | -1.58940700 | -0.32849400 |
| H | 1.90936400  | -1.85010000 | -0.14778000 |
| C | 4.87749800  | 0.62867600  | 0.12033200  |
| H | 3.39020100  | 2.09398900  | 0.66749000  |
| C | 5.11145500  | -0.69602500 | -0.23549500 |
| H | 4.22308000  | -2.62565900 | -0.60559100 |
| H | 5.70547600  | 1.33030700  | 0.19235600  |
| H | 6.12431500  | -1.03494000 | -0.44087100 |
| C | 1.10028100  | 0.63421400  | 0.55751700  |
| H | 1.12847500  | 1.62973300  | 1.03074000  |
| H | 0.61935100  | -0.04295600 | 1.27824400  |
| C | -4.07292900 | -0.92221100 | -0.40875900 |
| C | -3.33353400 | -1.23367600 | 0.88975400  |
| C | -1.86873100 | -0.88463800 | 0.56631600  |
| C | -3.35747700 | 0.32834600  | -0.88673600 |
| H | -3.94336800 | -1.73671700 | -1.13449400 |
| H | -5.14619100 | -0.76951800 | -0.26143100 |
| H | -3.44122300 | -2.26459000 | 1.23976100  |
| H | -3.69249000 | -0.57410600 | 1.69046000  |
| H | -1.37507700 | -0.47320900 | 1.45777900  |
| H | -3.73100300 | 1.22427100  | -0.36193200 |
| H | -3.45888500 | 0.51175800  | -1.96477600 |
| N | -1.95824300 | 0.04938500  | -0.55779900 |
| C | -1.08746500 | -2.14989200 | 0.21109300  |
| O | -0.80615900 | -2.98454100 | 1.04275300  |
| O | -0.76438000 | -2.28486500 | -1.07148600 |
| C | -1.01089000 | 1.12585200  | -0.77352100 |
| N | -1.33754900 | 2.34050200  | -0.03599600 |
| C | -0.53525700 | 3.47858000  | -0.42126900 |
| H | 0.50278200  | 3.45403900  | -0.03676100 |
| H | -0.48209500 | 3.54310800  | -1.51587800 |
| H | -1.00287900 | 4.40046600  | -0.05505400 |
| C | -1.64661500 | 2.27938500  | 1.37594700  |
| H | -2.41775100 | 1.52641400  | 1.57063400  |
| H | -0.78603100 | 2.06967800  | 2.03601400  |
| H | -2.06391000 | 3.24704000  | 1.68156100  |
| H | -1.13598200 | 1.41037300  | -1.83387500 |

#### T-10

|   |             |             |             |
|---|-------------|-------------|-------------|
| N | 0.51172100  | 0.49421600  | -0.59140200 |
| H | -3.37860500 | 0.24496400  | -0.68623100 |
| H | 1.09140100  | 1.01106800  | -1.24728200 |
| C | 2.62548700  | -0.26924600 | 0.29446600  |
| C | 2.84302100  | -1.46629200 | -0.39430600 |
| C | 3.71995400  | 0.52777500  | 0.62878600  |
| C | 4.13171200  | -1.86108300 | -0.73511500 |
| H | 1.98696800  | -2.08459900 | -0.66426000 |
| C | 5.01428200  | 0.13544200  | 0.28905200  |
| H | 3.55439100  | 1.46411500  | 1.16218900  |
| C | 5.22134000  | -1.05950700 | -0.39298400 |
| H | 4.28967100  | -2.79701600 | -1.26620000 |

|   |             |             |             |
|---|-------------|-------------|-------------|
| H | 5.86008500  | 0.76417100  | 0.55781800  |
| H | 6.22974500  | -1.36881900 | -0.65787200 |
| C | 1.22806400  | 0.16623200  | 0.63531500  |
| H | 1.28269700  | 0.99092800  | 1.36711400  |
| H | 0.69788000  | -0.65999000 | 1.13217600  |
| C | -2.71043600 | -0.72918800 | 2.17350300  |
| C | -2.08101100 | -1.87002900 | 1.37747200  |
| C | -1.80467000 | -1.22757500 | 0.00849000  |
| C | -1.90269500 | 0.47584200  | 1.71554100  |
| H | -3.76641500 | -0.60315900 | 1.89748800  |
| H | -2.66225600 | -0.88203200 | 3.25567200  |
| H | -2.70832500 | -2.76270400 | 1.29556700  |
| H | -1.13206200 | -2.17322500 | 1.83790900  |
| H | -0.88541300 | -1.62084500 | -0.44979200 |
| H | -0.94792600 | 0.51863600  | 2.26824800  |
| H | -2.42181600 | 1.42985100  | 1.86193700  |
| N | -1.72656400 | 0.20757000  | 0.28446300  |
| C | -2.94289200 | -1.53308200 | -0.96651100 |
| O | -3.11165200 | -2.62573600 | -1.45669300 |
| O | -3.75593300 | -0.50342600 | -1.20941700 |
| C | -0.85774600 | 0.99262800  | -0.57645300 |
| N | -1.05930200 | 2.42473000  | -0.34717000 |
| C | -0.97601200 | 3.18663600  | -1.58376600 |
| H | 0.03930700  | 3.18157300  | -2.02884700 |
| H | -1.68217000 | 2.79703800  | -2.32427600 |
| H | -1.24155000 | 4.23053900  | -1.38394800 |
| C | -0.20455800 | 3.03278100  | 0.65850000  |
| H | -0.29708400 | 2.52518700  | 1.62290300  |
| H | 0.86447700  | 3.03948900  | 0.36768800  |
| H | -0.51579000 | 4.07338400  | 0.80226300  |
| H | -1.22056300 | 0.82112100  | -1.60456400 |

#### T-11

|   |             |             |             |
|---|-------------|-------------|-------------|
| N | 0.79496200  | 0.28828800  | -0.58074700 |
| H | -2.72822200 | 1.33955600  | 0.09892600  |
| H | 1.29955100  | 1.11851400  | -0.88127100 |
| C | 2.97642700  | -0.42914500 | 0.16248000  |
| C | 3.46391800  | -1.17416800 | -0.91532000 |
| C | 3.86975200  | 0.33503000  | 0.91383300  |
| C | 4.81837700  | -1.16014800 | -1.22916600 |
| H | 2.76696200  | -1.76489900 | -1.50836900 |
| C | 5.22892200  | 0.35183700  | 0.60275400  |
| H | 3.49526400  | 0.92079500  | 1.75374000  |
| C | 5.70500200  | -0.39613700 | -0.46960600 |
| H | 5.18641300  | -1.74826500 | -2.06686000 |
| H | 5.91383000  | 0.95051400  | 1.19894200  |
| H | 6.76450000  | -0.38661400 | -0.71470300 |
| C | 1.50704800  | -0.41771000 | 0.47766400  |
| H | 1.36930900  | 0.01990700  | 1.48298400  |
| H | 1.11701800  | -1.44426400 | 0.51657200  |
| C | -2.67453300 | -1.83498300 | 1.58884600  |
| C | -2.87921200 | -2.30994100 | 0.14985700  |
| C | -2.51633000 | -1.06384900 | -0.65222500 |

|   |             |             |             |
|---|-------------|-------------|-------------|
| C | -1.55665100 | -0.78009600 | 1.50480500  |
| H | -3.59710700 | -1.37362500 | 1.96344200  |
| H | -2.42357100 | -2.65214400 | 2.27148500  |
| H | -3.89376800 | -2.66057200 | -0.05557000 |
| H | -2.17270300 | -3.10727200 | -0.10626300 |
| H | -2.25365800 | -1.31178900 | -1.69025400 |
| H | -0.62928900 | -1.11956600 | 1.98529100  |
| H | -1.87638800 | 0.13891900  | 2.02095900  |
| N | -1.35111500 | -0.57582300 | 0.06475800  |
| C | -3.73686900 | -0.13015000 | -0.73338400 |
| O | -4.76437800 | -0.50888400 | -1.25388400 |
| O | -3.64547100 | 1.09065000  | -0.21093000 |
| C | -0.62899000 | 0.53655600  | -0.49250100 |
| N | -1.01930000 | 1.84642100  | 0.12270900  |
| C | -0.97270500 | 2.93304800  | -0.85404100 |
| H | 0.05271900  | 3.14543500  | -1.20680500 |
| H | -1.59918100 | 2.69320700  | -1.72005900 |
| H | -1.36521700 | 3.84770000  | -0.39709300 |
| C | -0.26028500 | 2.23229300  | 1.30844500  |
| H | -0.29385300 | 1.45628000  | 2.07679700  |
| H | 0.79908300  | 2.44419900  | 1.07593800  |
| H | -0.70035000 | 3.14317000  | 1.72837500  |
| H | -0.98759200 | 0.62986300  | -1.52938600 |

#### T-12

|   |             |             |             |
|---|-------------|-------------|-------------|
| N | 0.39284900  | -0.27214800 | -0.49837400 |
| H | -0.59223900 | 2.60356700  | -0.22537800 |
| H | 0.83733700  | 0.64933200  | -0.64238000 |
| C | 2.57830900  | -1.03063500 | 0.21146700  |
| C | 3.20298600  | -1.44398000 | -0.96804000 |
| C | 3.34086700  | -0.43166000 | 1.21372900  |
| C | 4.56967300  | -1.25859700 | -1.14333400 |
| H | 2.60868700  | -1.91268000 | -1.75201900 |
| C | 4.71127500  | -0.24498300 | 1.04065200  |
| H | 2.85882300  | -0.11122100 | 2.13701800  |
| C | 5.32591700  | -0.65653900 | -0.13792100 |
| H | 5.04788300  | -1.58606800 | -2.06329800 |
| H | 5.29676200  | 0.22284100  | 1.82833000  |
| H | 6.39494600  | -0.51200600 | -0.27378000 |
| C | 1.09528100  | -1.20942300 | 0.37935100  |
| H | 0.81655900  | -1.03752000 | 1.42874100  |
| H | 0.80247600  | -2.23196500 | 0.11158100  |
| C | -3.35587100 | -2.16094300 | 0.90249900  |
| C | -4.15176700 | -1.59200600 | -0.26692700 |
| C | -3.26027400 | -0.46186400 | -0.75023400 |
| C | -1.92063000 | -2.15136300 | 0.39087900  |
| H | -3.44567200 | -1.49381400 | 1.76983900  |
| H | -3.67336100 | -3.16176500 | 1.20877900  |
| H | -5.13367400 | -1.20718200 | 0.01671200  |
| H | -4.28211800 | -2.35050600 | -1.05083600 |
| H | -3.40258000 | -0.23858900 | -1.81524500 |
| H | -1.68357200 | -3.06658800 | -0.16815200 |
| H | -1.18665000 | -2.02662800 | 1.19000300  |

|   |             |             |             |
|---|-------------|-------------|-------------|
| N | -1.89501600 | -1.00061600 | -0.53483600 |
| C | -3.45541700 | 0.88632700  | 0.04125000  |
| O | -4.64168800 | 1.22412800  | 0.18035500  |
| O | -2.40373200 | 1.47598100  | 0.39778500  |
| C | -0.89347500 | -0.19747100 | -0.80118800 |
| N | 0.43023800  | 2.59535500  | -0.21432900 |
| C | 0.95701700  | 3.76881300  | -0.89242200 |
| H | 2.05148500  | 3.70394400  | -0.93836900 |
| H | 0.57944900  | 3.81446500  | -1.91864100 |
| H | 0.69808000  | 4.71403100  | -0.38418400 |
| C | 0.84587300  | 2.54223500  | 1.18063100  |
| H | 0.32591500  | 1.71954900  | 1.68618500  |
| H | 1.92940900  | 2.36685100  | 1.24088700  |
| H | 0.62142200  | 3.47074600  | 1.73294100  |
| H | -1.14108900 | 0.66472300  | -1.41344100 |

### T-13

|   |             |             |             |
|---|-------------|-------------|-------------|
| N | -0.27559800 | 0.76510500  | -0.71775700 |
| H | -0.71377100 | 1.20215200  | -1.52260800 |
| H | 1.24358400  | -0.78088700 | 1.54301200  |
| C | -2.48469600 | 0.30798500  | 0.19558800  |
| C | -3.61233100 | 1.12669100  | 0.13885500  |
| C | -2.63677000 | -1.06726200 | -0.00926900 |
| C | -4.87370500 | 0.58755400  | -0.11205100 |
| H | -3.50159200 | 2.19916200  | 0.29885800  |
| C | -3.89283300 | -1.60886700 | -0.25668200 |
| H | -1.76341400 | -1.71764600 | 0.03077900  |
| C | -5.01564200 | -0.78226400 | -0.30930100 |
| H | -5.74411700 | 1.23870500  | -0.15062300 |
| H | -3.99756600 | -2.68115000 | -0.40515200 |
| H | -5.99775400 | -1.20866500 | -0.50062000 |
| C | -1.12647100 | 0.89704900  | 0.46238500  |
| H | -0.64986300 | 0.36022300  | 1.29383100  |
| H | -1.24988600 | 1.94328400  | 0.79021700  |
| C | 3.96228600  | -1.10419900 | -0.05179900 |
| C | 3.02678900  | -1.84179200 | -1.00052100 |
| C | 1.64911700  | -1.28851000 | -0.61326400 |
| C | 3.35639400  | 0.28709800  | -0.04126400 |
| H | 3.92694100  | -1.54863400 | 0.95297000  |
| H | 5.00634400  | -1.10384600 | -0.37927700 |
| H | 3.06787900  | -2.93293400 | -0.93136100 |
| H | 3.25004300  | -1.56298900 | -2.03843600 |
| H | 0.97162800  | -1.22965100 | -1.47337100 |
| H | 3.63954600  | 0.83794300  | -0.95600400 |
| H | 3.66190300  | 0.89784700  | 0.81474600  |
| N | 1.89801100  | 0.04591200  | -0.02864900 |
| C | 0.96100200  | -2.19949500 | 0.39733200  |
| O | 0.55325100  | -3.30430800 | 0.11872800  |
| O | 0.85500400  | -1.68646400 | 1.62472600  |
| C | 1.12817600  | 1.12906600  | -0.64406600 |
| N | 1.50816600  | 2.38395500  | -0.02282300 |
| H | 1.44182900  | 1.23054900  | -1.70580800 |
| C | 1.01444500  | 3.54558600  | -0.72553100 |



|   |             |            |             |
|---|-------------|------------|-------------|
| H | 1.52928400  | 4.44126600 | -0.35779500 |
| H | 1.22187400  | 3.45635400 | -1.79905700 |
| H | -0.07299100 | 3.71113800 | -0.59888200 |
| C | 1.42560100  | 2.52707500 | 1.41851800  |
| H | 1.70118000  | 1.59238000 | 1.91574900  |
| H | 2.13537100  | 3.29984300 | 1.74308100  |
| H | 0.42529200  | 2.82264100 | 1.77914100  |

**T-14**

|   |             |             |             |
|---|-------------|-------------|-------------|
| N | 0.56824100  | 0.60992900  | 0.82539700  |
| H | 1.10671500  | 0.89115800  | 1.63868700  |
| H | -3.43705900 | 0.40660400  | 0.03483300  |
| C | 2.67568700  | 0.15734900  | -0.29998800 |
| C | 3.87243500  | 0.87265200  | -0.30968100 |
| C | 2.72347500  | -1.23745100 | -0.21260200 |
| C | 5.09811700  | 0.21040600  | -0.23695500 |
| H | 3.84455900  | 1.95980900  | -0.37771300 |
| C | 3.94191600  | -1.90204200 | -0.14244500 |
| H | 1.79019500  | -1.79955800 | -0.19991000 |
| C | 5.13445000  | -1.17752000 | -0.15358700 |
| H | 6.02345000  | 0.78194000  | -0.24516000 |
| H | 3.96531600  | -2.98769500 | -0.08180100 |
| H | 6.08859500  | -1.69647500 | -0.09826600 |
| C | 1.34999500  | 0.86510700  | -0.38143100 |
| H | 0.79493800  | 0.49646200  | -1.25534300 |
| H | 1.53071400  | 1.93860000  | -0.56563300 |
| C | -2.37108400 | -2.19681400 | 1.54109400  |
| C | -1.60416500 | -2.35587200 | 0.23515800  |
| C | -1.67891600 | -0.94324600 | -0.35703300 |
| C | -1.86921500 | -0.84815800 | 2.01895900  |
| H | -3.45340200 | -2.16672200 | 1.35344900  |
| H | -2.17596600 | -2.99675300 | 2.26138900  |
| H | -2.00495600 | -3.11163000 | -0.44644100 |
| H | -0.55596700 | -2.60222900 | 0.44788500  |
| H | -0.80479000 | -0.73949000 | -0.98674500 |
| H | -0.86621100 | -0.96479200 | 2.46535500  |
| H | -2.52188400 | -0.36308900 | 2.75503000  |
| N | -1.78700600 | -0.02663400 | 0.79306500  |
| C | -2.91706000 | -0.81428500 | -1.24885100 |
| O | -3.05063800 | -1.44029400 | -2.27671400 |
| O | -3.83827900 | 0.02967700  | -0.79161300 |
| C | -0.82280600 | 1.07224100  | 0.94309900  |
| N | -1.22731400 | 2.25754400  | 0.21426800  |
| H | -0.93081100 | 1.36212200  | 1.99849600  |
| C | -0.63923700 | 3.47713200  | 0.72556000  |
| H | -1.18189600 | 4.33767200  | 0.31596400  |
| H | -0.72947500 | 3.51402600  | 1.81783100  |
| H | 0.42865300  | 3.60497800  | 0.46528100  |
| C | -1.32207100 | 2.26799800  | -1.23424200 |
| H | -1.69150000 | 1.31794600  | -1.62490600 |
| H | -2.04570200 | 3.03598800  | -1.53630200 |
| H | -0.36873500 | 2.49521600  | -1.74080700 |

**T-15**

|   |             |             |             |
|---|-------------|-------------|-------------|
| N | -0.44773900 | 0.31518700  | -0.84894400 |
| H | -1.07773900 | 0.79104400  | -1.48671100 |
| H | 1.53272900  | 1.20078600  | 1.33368500  |
| C | -2.56371600 | -0.18852100 | 0.20919400  |
| C | -2.94657800 | -1.34156300 | -0.48343100 |
| C | -3.54916300 | 0.69300100  | 0.65283600  |
| C | -4.28967100 | -1.60806200 | -0.72391200 |
| H | -2.17699100 | -2.03047000 | -0.83090100 |
| C | -4.89729000 | 0.42785200  | 0.41520100  |
| H | -3.25882700 | 1.59023900  | 1.19946900  |
| C | -5.26899500 | -0.72199400 | -0.27454500 |
| H | -4.57601000 | -2.51040600 | -1.25941600 |
| H | -5.65614000 | 1.12041600  | 0.77198000  |
| H | -6.31991500 | -0.93175800 | -0.45976600 |
| C | -1.10701900 | 0.09571300  | 0.44296100  |
| H | -0.65350000 | -0.76734400 | 0.94694400  |
| H | -1.00882700 | 0.94569000  | 1.13792900  |
| C | 3.30534400  | -1.89255400 | -1.47214200 |
| C | 3.11740700  | -1.95967800 | 0.05041600  |
| C | 1.86636700  | -1.10986600 | 0.31471300  |
| C | 2.30787200  | -0.82953000 | -1.93541600 |
| H | 4.33239200  | -1.61159200 | -1.72637200 |
| H | 3.10468900  | -2.85478600 | -1.95423700 |
| H | 3.97234800  | -1.51111800 | 0.57049200  |
| H | 2.99350400  | -2.97259900 | 0.44146700  |
| H | 0.97441700  | -1.75020000 | 0.15598800  |
| H | 1.40377000  | -1.30338700 | -2.36381400 |
| H | 2.71601600  | -0.14391100 | -2.68936600 |
| N | 1.96358500  | -0.08460000 | -0.72239800 |
| C | 1.83493900  | -0.68730800 | 1.77839200  |
| O | 1.89534100  | -1.54684300 | 2.63442200  |
| O | 1.75904500  | 0.59462900  | 2.10423300  |
| C | 0.88625700  | 0.86279100  | -0.94402000 |
| N | 1.13088500  | 2.04924100  | -0.08517000 |
| H | 0.98523100  | 1.19146500  | -1.99830400 |
| C | 2.42354200  | 2.65904500  | -0.41406300 |
| H | 2.59051200  | 3.52135300  | 0.23874400  |
| H | 3.22774700  | 1.93578900  | -0.26668500 |
| H | 2.44472300  | 3.00382500  | -1.46429300 |
| C | 0.08684600  | 3.05752600  | -0.24330400 |
| H | -0.89181000 | 2.68309300  | 0.06685900  |
| H | 0.32793700  | 3.92457900  | 0.37868100  |
| H | 0.01467900  | 3.39709700  | -1.29331500 |

**T-16**

|   |             |             |             |
|---|-------------|-------------|-------------|
| N | -0.37447500 | -0.46780700 | -1.71272600 |
| H | -0.96989700 | 0.08709900  | -2.31736900 |
| H | 0.86165500  | 1.66173000  | 0.50682200  |
| C | -2.35461200 | -0.87065500 | -0.35875800 |
| C | -3.58358400 | -1.02601000 | -1.00108000 |
| C | -2.27340900 | -0.10255200 | 0.80675200  |
| C | -4.72768500 | -0.41715600 | -0.48898400 |

|   |             |             |             |
|---|-------------|-------------|-------------|
| H | -3.64664600 | -1.63602000 | -1.90245800 |
| C | -3.41737200 | 0.50284900  | 1.31655800  |
| H | -1.30896200 | 0.01684900  | 1.30633500  |
| C | -4.64334600 | 0.34964400  | 0.66995400  |
| H | -5.68355200 | -0.54651600 | -0.99127700 |
| H | -3.35174200 | 1.09520300  | 2.22627100  |
| H | -5.53514600 | 0.82307400  | 1.07428400  |
| C | -1.11218000 | -1.48642300 | -0.94142600 |
| H | -1.36804200 | -2.30836600 | -1.62155900 |
| H | -0.47570600 | -1.89050000 | -0.15278800 |
| C | 3.94396400  | -0.24885000 | 0.15852400  |
| C | 3.44737000  | -1.68461900 | 0.29995200  |
| C | 1.95008900  | -1.56884400 | 0.00871800  |
| C | 3.19109600  | 0.24941600  | -1.06302000 |
| H | 3.65842000  | 0.33786500  | 1.03958300  |
| H | 5.02753200  | -0.17761000 | 0.02820600  |
| H | 3.62021000  | -2.11781700 | 1.28919500  |
| H | 3.93063800  | -2.33162600 | -0.44448200 |
| H | 1.54653100  | -2.49307200 | -0.42040900 |
| H | 3.70867200  | -0.02081000 | -1.99339600 |
| H | 2.98480700  | 1.32564200  | -1.06068000 |
| N | 1.90693200  | -0.48866100 | -0.99831300 |
| C | 1.16055300  | -1.21616200 | 1.30636300  |
| O | 0.83616000  | -2.21115400 | 1.97892800  |
| O | 0.94726900  | 0.00081300  | 1.52632800  |
| C | 0.87549400  | -0.02797300 | -1.65529300 |
| N | 0.83139300  | 2.49193500  | -0.09492800 |
| H | 1.07128600  | 0.84588300  | -2.27394300 |
| C | 1.72714600  | 3.49606600  | 0.45167200  |
| H | 1.38499900  | 3.90189100  | 1.42186000  |
| H | 2.72690700  | 3.07074800  | 0.60279900  |
| H | 1.82059500  | 4.33967100  | -0.24599100 |
| C | -0.53261600 | 2.98377600  | -0.16123500 |
| H | -1.20920200 | 2.19314200  | -0.51045500 |
| H | -0.91729900 | 3.33922500  | 0.81387900  |
| H | -0.59587500 | 3.82373300  | -0.86689700 |

#### T-17

|   |             |             |             |
|---|-------------|-------------|-------------|
| N | 0.63337900  | -0.32663200 | 1.28226200  |
| H | -2.23799400 | -2.02972200 | -0.24516900 |
| H | 1.09603800  | -0.56695000 | 2.15265800  |
| C | 2.68063300  | -0.38020800 | -0.07680000 |
| C | 3.00783800  | 0.93947000  | 0.24535500  |
| C | 3.66604900  | -1.19811100 | -0.63432800 |
| C | 4.28904200  | 1.43017700  | 0.00731500  |
| H | 2.24738000  | 1.57796400  | 0.69161600  |
| C | 4.94675600  | -0.70922900 | -0.87708000 |
| H | 3.42438300  | -2.23200600 | -0.88053300 |
| C | 5.26293200  | 0.60895100  | -0.55652400 |
| H | 4.52809800  | 2.46005000  | 0.26408000  |
| H | 5.70084100  | -1.36190500 | -1.31127800 |
| H | 6.26367500  | 0.99289600  | -0.74031200 |
| C | 1.28978300  | -0.92071300 | 0.12456000  |

|   |             |             |             |
|---|-------------|-------------|-------------|
| H | 1.32998900  | -2.02101500 | 0.18110200  |
| H | 0.66761800  | -0.68975700 | -0.75217900 |
| C | -2.22052600 | 2.30335800  | -0.46587900 |
| C | -3.37107500 | 1.63226100  | 0.27192800  |
| C | -2.91475200 | 0.18042200  | 0.34367000  |
| C | -1.01368700 | 1.63159200  | 0.16270900  |
| H | -2.27368600 | 2.07082500  | -1.53786600 |
| H | -2.20087900 | 3.39142400  | -0.35333500 |
| H | -4.34045900 | 1.73168200  | -0.22201400 |
| H | -3.45200700 | 2.03871900  | 1.28887100  |
| H | -3.26847200 | -0.31459200 | 1.26315900  |
| H | -0.78882800 | 2.08491700  | 1.14621500  |
| H | -0.10510500 | 1.69794700  | -0.44648300 |
| N | -1.43682300 | 0.23152900  | 0.32240900  |
| C | -3.43157300 | -0.65543500 | -0.83272200 |
| O | -4.27464100 | -0.26898500 | -1.61032700 |
| O | -2.90768900 | -1.87617100 | -0.94654800 |
| C | -0.77558100 | -0.48846000 | 1.37282100  |
| H | -1.08425700 | -0.13859800 | 2.38257200  |
| H | -1.10964900 | -2.33219400 | 2.04819400  |
| O | -1.22611900 | -1.84714200 | 1.22285700  |

**T-19**

|   |             |             |             |
|---|-------------|-------------|-------------|
| N | -0.44378000 | 1.01358500  | -0.71259400 |
| H | -1.04675300 | 1.72837700  | -1.10819200 |
| H | 1.77251400  | 0.81675000  | 1.55211300  |
| C | -2.50335000 | 0.08089700  | 0.17228500  |
| C | -2.76365200 | -0.92069100 | -0.76803700 |
| C | -3.57624000 | 0.71549800  | 0.79716700  |
| C | -4.07100000 | -1.28333800 | -1.07166900 |
| H | -1.92812100 | -1.41407700 | -1.26354500 |
| C | -4.88901800 | 0.35549600  | 0.49464000  |
| H | -3.38111200 | 1.49690900  | 1.53082400  |
| C | -5.13815400 | -0.64456000 | -0.43976300 |
| H | -4.26009700 | -2.06765900 | -1.80113900 |
| H | -5.71612300 | 0.85806200  | 0.99089700  |
| H | -6.16105100 | -0.92825300 | -0.67645700 |
| C | -1.08778900 | 0.47253900  | 0.49123300  |
| H | -0.53476400 | -0.41515300 | 0.82875800  |
| H | -1.07610700 | 1.18880800  | 1.32665800  |
| C | 4.07192800  | -0.34006100 | -0.90902300 |
| C | 3.01807400  | -1.43985400 | -1.04299800 |
| C | 1.81673800  | -0.82947600 | -0.31607700 |
| C | 3.26989400  | 0.96625100  | -0.97500700 |
| H | 4.57408900  | -0.42443700 | 0.06376100  |
| H | 4.84684500  | -0.39473800 | -1.67894000 |
| H | 3.32476700  | -2.39675200 | -0.61284600 |
| H | 2.74565900  | -1.59650300 | -2.09295500 |
| H | 0.87408200  | -1.29152900 | -0.64095500 |
| H | 3.34708000  | 1.46209800  | -1.95593900 |
| H | 3.62931000  | 1.68321600  | -0.21670500 |
| N | 1.89162000  | 0.54772900  | -0.74305700 |
| C | 1.94728600  | -1.08550700 | 1.19461900  |

|   |            |             |             |
|---|------------|-------------|-------------|
| O | 2.04479700 | -2.21015000 | 1.63275600  |
| O | 1.97036000 | -0.03100100 | 2.01237500  |
| C | 0.88337500 | 1.53307700  | -0.59803000 |
| H | 1.03020500 | 2.28081700  | -1.39296200 |
| O | 1.02650100 | 2.24250500  | 0.67892100  |
| H | 1.62289000 | 2.99240600  | 0.56872700  |

**T-TS3-IM1**

|   |             |             |             |
|---|-------------|-------------|-------------|
| C | 1.54165800  | 2.39480800  | 0.46855400  |
| C | 1.85592900  | 1.59693400  | -0.80218300 |
| C | 0.96425600  | 0.34633200  | -0.72907200 |
| C | 0.14721700  | 1.92537300  | 0.83352500  |
| H | 2.24101400  | 2.13823800  | 1.27421400  |
| H | 1.59185800  | 3.47703700  | 0.32017500  |
| H | 2.90726500  | 1.30853100  | -0.87832900 |
| H | 1.61158200  | 2.17605900  | -1.69863600 |
| H | 0.20055200  | 0.38115000  | -1.52087800 |
| H | -0.60923000 | 2.35616400  | 0.16421200  |
| H | -0.15018500 | 2.08626800  | 1.87468200  |
| N | 0.19264800  | 0.47130700  | 0.55058200  |
| C | 1.69656200  | -0.99625800 | -0.86985700 |
| O | 2.79828700  | -1.02705900 | -1.38948200 |
| O | 1.05406600  | -2.05361300 | -0.46387200 |
| H | 0.06033700  | -1.87064100 | -0.01839200 |
| C | -1.30417600 | -0.28176000 | 0.55699800  |
| N | -2.01997100 | 0.21765000  | -0.56733300 |
| O | -1.05428300 | -1.57029900 | 0.61746400  |
| H | 0.68052600  | -0.00222900 | 1.33074100  |
| O | 0.45581800  | -1.15135300 | 2.88223300  |
| H | 1.09273700  | -1.78354300 | 3.22905300  |
| H | -0.14763600 | -1.65352000 | 2.29673200  |
| C | -2.31223700 | -0.73732000 | -1.62623500 |
| H | -2.59895800 | -0.18343700 | -2.52731400 |
| H | -1.43996700 | -1.35136400 | -1.86194000 |
| H | -3.13572300 | -1.41700500 | -1.35367700 |
| C | -3.16196000 | 1.06452000  | -0.26518900 |
| H | -2.92253200 | 1.77006400  | 0.53688900  |
| H | -3.43357600 | 1.64811900  | -1.15220900 |
| H | -4.04566900 | 0.47817000  | 0.04213200  |
| H | -1.70572900 | 0.16205800  | 1.48980600  |

**T-TS3-5b-H<sub>2</sub>O**

|   |             |            |             |
|---|-------------|------------|-------------|
| C | 0.96230900  | 2.65930600 | 0.02350900  |
| C | 2.10936200  | 1.67064000 | -0.09535900 |
| C | 1.39662200  | 0.40154900 | -0.52226000 |
| C | -0.11027300 | 1.83447600 | 0.71263600  |
| H | 1.21792300  | 3.55956200 | 0.58954000  |
| H | 0.62186300  | 2.97474400 | -0.97250900 |
| H | 2.59976200  | 1.51038000 | 0.87348200  |
| H | 2.88365000  | 1.95571400 | -0.81260600 |
| H | 1.15361100  | 0.46375000 | -1.59667100 |
| H | -1.13630900 | 2.13478900 | 0.48901800  |
| H | 0.02748500  | 1.82857200 | 1.80114900  |

|   |             |             |             |
|---|-------------|-------------|-------------|
| N | 0.08946100  | 0.42550200  | 0.23026600  |
| C | 2.23874500  | -0.86780500 | -0.35270000 |
| O | 3.40355700  | -0.80268800 | -0.03006000 |
| O | 1.66763700  | -2.02102600 | -0.66505300 |
| H | 0.67479600  | -1.93997300 | -0.77613000 |
| C | -1.05075900 | -0.22390500 | -0.60318000 |
| O | -0.91287300 | -1.57585900 | -0.43509200 |
| H | 0.13027800  | -0.34404700 | 1.15020200  |
| O | -0.19423900 | -1.43238800 | 1.82541100  |
| H | 0.54265400  | -2.00105400 | 2.07520900  |
| H | -0.65355300 | -1.72604200 | 0.72805200  |
| N | -2.32063800 | 0.34442400  | -0.25416700 |
| C | -2.84972700 | -0.07965300 | 1.03608200  |
| H | -3.75423500 | 0.50005200  | 1.24824000  |
| H | -3.10759600 | -1.15132500 | 1.05280300  |
| H | -2.12867700 | 0.10192800  | 1.83932000  |
| C | -3.29939300 | 0.12326300  | -1.31006200 |
| H | -4.21200000 | 0.68049600  | -1.07274800 |
| H | -2.91550500 | 0.49252000  | -2.26738800 |
| H | -3.56277200 | -0.94287600 | -1.42330900 |
| H | -0.85710800 | 0.06179200  | -1.65200400 |

#### T-TSIM1-5a

|   |             |             |             |
|---|-------------|-------------|-------------|
| C | 0.44655400  | 2.69012400  | 0.07843200  |
| C | 1.52189600  | 1.85571200  | -0.60033000 |
| C | 0.91504200  | 0.46277800  | -0.57798900 |
| C | 0.02555800  | 1.78762600  | 1.22578700  |
| H | 0.80555300  | 3.66260700  | 0.42776700  |
| H | -0.39434400 | 2.86458500  | -0.60654600 |
| H | 2.45417200  | 1.86439400  | -0.02082000 |
| H | 1.76370600  | 2.17464900  | -1.61788900 |
| H | 0.16132700  | 0.38462100  | -1.38108100 |
| H | -0.99113100 | 1.95836300  | 1.59355900  |
| H | 0.70624600  | 1.89348500  | 2.08004100  |
| N | 0.15293700  | 0.38907900  | 0.70942600  |
| C | 1.92071900  | -0.66205500 | -0.79452900 |
| O | 3.06186600  | -0.43934500 | -1.13122500 |
| O | 1.46637200  | -1.90535800 | -0.67568300 |
| H | 0.53323300  | -1.93763700 | -0.32645900 |
| C | -1.20410700 | -0.41035800 | 0.58591100  |
| N | -1.93642900 | -0.02330400 | -0.58054500 |
| O | -0.86038400 | -1.72157100 | 0.62657300  |
| H | 0.64781400  | -0.31850300 | 1.56623600  |
| O | 0.65386700  | -1.31487600 | 2.40158400  |
| H | 1.47050300  | -1.82343200 | 2.44364900  |
| H | -0.15265000 | -1.76172800 | 1.59008200  |
| H | -1.73877500 | -0.08225600 | 1.49880100  |
| C | -2.20916900 | -1.06972700 | -1.55581800 |
| H | -1.29781700 | -1.60289600 | -1.83708300 |
| H | -2.93609700 | -1.81185300 | -1.18777600 |
| H | -2.61489100 | -0.59845700 | -2.45761400 |
| C | -3.11722300 | 0.78076100  | -0.31013300 |
| H | -2.88010600 | 1.61632900  | 0.35583500  |

|   |             |            |             |
|---|-------------|------------|-------------|
| H | -3.48961100 | 1.20616300 | -1.24818000 |
| H | -3.93207500 | 0.19116800 | 0.14732900  |

#### T-TS5a-6a

|   |             |             |             |
|---|-------------|-------------|-------------|
| C | -2.41748600 | -1.48384300 | 0.11605300  |
| C | -2.34832200 | -0.49758300 | -1.04385500 |
| C | -1.02586600 | 0.22497200  | -0.78366500 |
| C | -0.97625400 | -1.95965500 | 0.26150600  |
| H | -2.73754700 | -0.96280600 | 1.02757100  |
| H | -3.11225500 | -2.31047400 | -0.05642400 |
| H | -3.18477600 | 0.20366300  | -1.08526600 |
| H | -2.28683100 | -1.02923200 | -2.00166200 |
| H | -0.64400400 | 0.66119100  | -1.71352900 |
| H | -0.78840200 | -2.89395100 | -0.28630500 |
| H | -0.70025600 | -2.11946100 | 1.31267500  |
| N | -0.17130800 | -0.87616400 | -0.33558100 |
| C | -1.23650100 | 1.36993100  | 0.23012900  |
| O | -1.99519800 | 2.26981600  | -0.10596500 |
| O | -0.63164400 | 1.31996800  | 1.37593200  |
| H | 0.22012800  | 0.57734200  | 1.56152100  |
| C | 1.14877200  | -0.84468300 | -0.03050900 |
| N | 2.08069400  | -0.08739900 | -0.69067600 |
| O | 1.23140600  | -0.17390900 | 1.68419800  |
| H | 1.07972100  | -0.86141300 | 2.34348500  |
| H | 1.52908600  | -1.83657100 | 0.21798300  |
| C | 3.45732600  | -0.44503800 | -0.36397100 |
| H | 3.57318000  | -1.53230700 | -0.34443000 |
| H | 4.12086300  | -0.04630800 | -1.13706700 |
| H | 3.75598400  | -0.03393700 | 0.61190600  |
| C | 1.93607900  | 1.36387500  | -0.78961800 |
| H | 0.96086700  | 1.66051100  | -1.17139500 |
| H | 2.09738400  | 1.84130900  | 0.18762300  |
| H | 2.68816100  | 1.73252600  | -1.49262000 |

#### T-TS5b-6b

|   |             |             |             |
|---|-------------|-------------|-------------|
| C | -1.20736200 | 2.51856900  | 0.06948100  |
| C | -2.22392800 | 1.38875100  | 0.06299100  |
| C | -1.41347900 | 0.17131600  | 0.50625100  |
| C | 0.04141000  | 1.85629700  | -0.49456200 |
| H | -1.51793600 | 3.38776700  | -0.51782200 |
| H | -1.01550800 | 2.85319900  | 1.09770100  |
| H | -2.60732000 | 1.21972700  | -0.95243100 |
| H | -3.08480800 | 1.55254300  | 0.71384200  |
| H | -1.38322300 | 0.12360300  | 1.60943000  |
| H | 0.96810400  | 2.32335300  | -0.14384300 |
| H | 0.03341000  | 1.87276300  | -1.59524300 |
| N | -0.05230100 | 0.48201500  | 0.01597800  |
| C | -2.08316100 | -1.13722800 | 0.05414500  |
| O | -3.27805400 | -1.23261500 | 0.31368300  |
| O | -1.38731600 | -2.05279100 | -0.52870200 |
| H | -0.22112000 | -1.93732200 | -0.63596600 |
| C | 0.99645400  | -0.27132000 | 0.41118200  |
| O | 0.98589500  | -1.79682100 | -0.67301900 |

|   |            |             |             |
|---|------------|-------------|-------------|
| H | 1.20831800 | -1.52978800 | -1.57442700 |
| N | 2.28288700 | 0.19205000  | 0.35559200  |
| H | 0.79345400 | -0.90585700 | 1.27774600  |
| C | 3.23867900 | -0.57022500 | 1.15038800  |
| H | 4.16854900 | 0.00159500  | 1.22403000  |
| H | 2.85263700 | -0.72637900 | 2.16092500  |
| H | 3.45331300 | -1.54571200 | 0.68820800  |
| C | 2.84533000 | 0.57966200  | -0.93289700 |
| H | 2.07836600 | 0.94744300  | -1.61644800 |
| H | 3.58950000 | 1.36984700  | -0.78951000 |
| H | 3.34230700 | -0.28234300 | -1.40475500 |

**T-TS6a-7**

|   |             |             |             |
|---|-------------|-------------|-------------|
| N | -0.34716300 | 0.41252300  | 0.42996200  |
| H | -0.01118500 | -0.43576700 | -0.22388500 |
| H | -0.55604900 | -0.01609600 | 1.33443100  |
| C | -2.76779600 | 0.29284400  | 0.02640600  |
| C | -2.83719500 | -0.87060700 | -0.74725400 |
| C | -3.84372400 | 0.63576100  | 0.84512800  |
| C | -3.96954900 | -1.67583000 | -0.69754000 |
| H | -1.99723800 | -1.15048600 | -1.38381200 |
| C | -4.98145300 | -0.16747000 | 0.88912800  |
| H | -3.79391000 | 1.54179500  | 1.44822500  |
| C | -5.04449400 | -1.32432100 | 0.11823800  |
| H | -4.01349900 | -2.57963700 | -1.30006200 |
| H | -5.81708300 | 0.11111800  | 1.52661600  |
| H | -5.93053000 | -1.95369600 | 0.15127500  |
| C | -1.54171300 | 1.15789200  | -0.02590300 |
| H | -1.66436300 | 2.04924800  | 0.60394000  |
| H | -1.34227800 | 1.49699500  | -1.04862800 |
| C | 3.10982500  | -1.53049500 | 1.81744100  |
| C | 3.85656900  | -1.08129200 | 0.56307900  |
| C | 2.75104900  | -0.41846900 | -0.25477300 |
| C | 2.07696600  | -0.42349800 | 2.05840800  |
| H | 2.59708600  | -2.47994400 | 1.61627400  |
| H | 3.76377100  | -1.68643000 | 2.68071000  |
| H | 4.32629700  | -1.90316900 | 0.01768700  |
| H | 4.62191600  | -0.33570700 | 0.81245200  |
| H | 3.16982400  | 0.29296300  | -0.98041500 |
| H | 2.36158600  | 0.25570700  | 2.87762500  |
| H | 1.10333300  | -0.86869800 | 2.33020300  |
| N | 2.04092400  | 0.31404200  | 0.79595000  |
| C | 1.94114700  | -1.46651800 | -1.06644000 |
| O | 2.59578500  | -2.22700100 | -1.78454800 |
| O | 0.66153200  | -1.45057100 | -0.96675700 |
| C | 0.99390200  | 1.23695300  | 0.58512200  |
| N | 1.16067400  | 2.15574900  | -0.47245000 |
| C | 0.91261200  | 3.55940800  | -0.23152300 |
| H | -0.11854500 | 3.86455100  | -0.48929100 |
| H | 1.10086600  | 3.81200900  | 0.81653600  |
| H | 1.59511300  | 4.16461500  | -0.84225300 |
| C | 1.09495700  | 1.77697500  | -1.87170600 |
| H | 2.00955600  | 2.07135000  | -2.40530900 |



|   |            |            |             |
|---|------------|------------|-------------|
| H | 0.95830500 | 0.69955900 | -1.99515000 |
| H | 0.24822400 | 2.27740700 | -2.37114400 |
| H | 0.84261400 | 1.80868800 | 1.51331400  |

**T-TS6b-8**

|   |             |             |             |
|---|-------------|-------------|-------------|
| N | 0.21830700  | 1.01146600  | 0.62601600  |
| H | 0.60903000  | 1.88859000  | 0.97166600  |
| H | 0.38007600  | 0.25943900  | 1.32333100  |
| C | 2.32303700  | 0.29243500  | -0.45535900 |
| C | 3.27522500  | 1.29830300  | -0.63799100 |
| C | 2.73497200  | -0.98444900 | -0.06232100 |
| C | 4.62679500  | 1.04026100  | -0.42682500 |
| H | 2.95337200  | 2.29103400  | -0.95605400 |
| C | 4.08727900  | -1.23975500 | 0.14936200  |
| H | 1.98926200  | -1.76880200 | 0.08456000  |
| C | 5.03312500  | -0.23198500 | -0.03076800 |
| H | 5.36184500  | 1.82801500  | -0.57582500 |
| H | 4.40333100  | -2.23413000 | 0.45568200  |
| H | 6.08808700  | -0.43937900 | 0.13406300  |
| C | 0.86376800  | 0.59904000  | -0.63908100 |
| H | 0.32319000  | -0.28881900 | -0.99041700 |
| H | 0.72694300  | 1.39721600  | -1.37891800 |
| C | -2.66239000 | -1.75491700 | -1.64586300 |
| C | -2.96670500 | -2.30161200 | -0.25613400 |
| C | -2.09792900 | -1.46601600 | 0.66870900  |
| C | -2.51227800 | -0.25453000 | -1.42344000 |
| H | -1.71314400 | -2.17400600 | -1.99990900 |
| H | -3.43710300 | -1.98180200 | -2.38471500 |
| H | -2.73477900 | -3.36578700 | -0.16327600 |
| H | -4.02601900 | -2.14721700 | -0.00918500 |
| H | -2.57067800 | -1.29839100 | 1.64672100  |
| H | -3.46997500 | 0.28124400  | -1.52079900 |
| H | -1.80314800 | 0.18019700  | -2.13934300 |
| N | -2.02797000 | -0.15881000 | -0.04359700 |
| C | -0.65958000 | -1.99162100 | 0.92187300  |
| O | -0.20400300 | -2.86259600 | 0.15863200  |
| O | -0.06311400 | -1.40550700 | 1.87274300  |
| C | -1.68027900 | 0.96077100  | 0.63030900  |
| N | -2.12310900 | 2.22680300  | 0.27057300  |
| H | -1.72534500 | 0.80758800  | 1.71094600  |
| C | -2.04858600 | 3.21326600  | 1.33822300  |
| H | -2.70197700 | 4.05580100  | 1.09064600  |
| H | -2.39154500 | 2.78421100  | 2.28317800  |
| H | -1.02758800 | 3.61212800  | 1.47488200  |
| C | -1.74946600 | 2.81223000  | -1.00613800 |
| H | -1.83796800 | 2.10058700  | -1.82621500 |
| H | -2.41635500 | 3.65401300  | -1.21677500 |
| H | -0.71511600 | 3.19835500  | -0.98353200 |

**T-TS7-9**

|   |             |             |             |
|---|-------------|-------------|-------------|
| N | 0.39057700  | 0.55757600  | -0.70468700 |
| H | -0.64173200 | -1.34327800 | -1.31722700 |
| H | 0.98763300  | 1.03217700  | -1.37623500 |

|   |             |             |             |
|---|-------------|-------------|-------------|
| C | 2.52344300  | 0.05604400  | 0.31792900  |
| C | 2.81498200  | -1.25642300 | -0.06484200 |
| C | 3.56109000  | 0.98403100  | 0.40928900  |
| C | 4.12398600  | -1.63317600 | -0.34430400 |
| H | 2.00405300  | -1.97981500 | -0.14604000 |
| C | 4.87428200  | 0.60957400  | 0.12808400  |
| H | 3.33668700  | 2.00872800  | 0.70747100  |
| C | 5.15659500  | -0.70028800 | -0.24855200 |
| H | 4.34136400  | -2.65820200 | -0.63565700 |
| H | 5.67534300  | 1.34106700  | 0.20654500  |
| H | 6.18024900  | -0.99616100 | -0.46630000 |
| C | 1.10253200  | 0.47054600  | 0.57444100  |
| H | 1.09631700  | 1.42238300  | 1.12972100  |
| H | 0.61261800  | -0.27453800 | 1.21803400  |
| C | -4.11023000 | -0.76952700 | -0.53844600 |
| C | -3.47291600 | -1.05922900 | 0.81693800  |
| C | -1.97676000 | -0.82567500 | 0.55479900  |
| C | -3.30946600 | 0.43001700  | -1.01027700 |
| H | -3.95955100 | -1.61757200 | -1.22092700 |
| H | -5.18386300 | -0.56962900 | -0.47532000 |
| H | -3.66653200 | -2.06121700 | 1.20884900  |
| H | -3.83051700 | -0.33357800 | 1.55906200  |
| H | -1.48820100 | -0.44675600 | 1.46554300  |
| H | -3.68639400 | 1.36182700  | -0.55263200 |
| H | -3.32520900 | 0.56855500  | -2.09996800 |
| N | -1.95217100 | 0.11593400  | -0.56459500 |
| C | -1.27909400 | -2.15588500 | 0.24670900  |
| O | -1.30460800 | -3.08149100 | 1.02821100  |
| O | -0.64546000 | -2.24158800 | -0.91865800 |
| C | -0.95451700 | 1.13933800  | -0.76083400 |
| N | -1.20706500 | 2.36045100  | -0.00677600 |
| C | -0.32573100 | 3.45045800  | -0.35306200 |
| H | 0.69881200  | 3.35521200  | 0.05697800  |
| H | -0.24070200 | 3.52903000  | -1.44499000 |
| H | -0.74303700 | 4.39471600  | 0.01715000  |
| C | -1.56989200 | 2.30229200  | 1.39176100  |
| H | -2.39023500 | 1.59401900  | 1.54637600  |
| H | -0.74743100 | 2.03364600  | 2.07948600  |
| H | -1.93987200 | 3.28940500  | 1.69626400  |
| H | -1.05846900 | 1.44431100  | -1.81799900 |

#### T-TS9-10

|   |             |             |             |
|---|-------------|-------------|-------------|
| N | 0.41416600  | 0.34800400  | -0.00899600 |
| H | -2.69228500 | -0.74771700 | -1.52046300 |
| H | 0.43270400  | -0.66898800 | -0.04265400 |
| C | 2.83075500  | 0.17529300  | -0.25979700 |
| C | 3.31145400  | 0.46027400  | 1.02206900  |
| C | 3.52034300  | -0.74183200 | -1.05198100 |
| C | 4.46265200  | -0.15625400 | 1.49865300  |
| H | 2.76732600  | 1.17182400  | 1.64342900  |
| C | 4.67523800  | -1.36252900 | -0.57779200 |
| H | 3.14957400  | -0.97040700 | -2.05079400 |
| C | 5.14831800  | -1.07003800 | 0.69764500  |

|   |             |             |             |
|---|-------------|-------------|-------------|
| H | 4.82948200  | 0.07581400  | 2.49601000  |
| H | 5.20391300  | -2.07547500 | -1.20621200 |
| H | 6.04975000  | -1.55161700 | 1.06941300  |
| C | 1.57597600  | 0.83509600  | -0.75328300 |
| H | 1.46703200  | 0.67017700  | -1.84321000 |
| H | 1.64916600  | 1.92102900  | -0.60540000 |
| C | -4.00286100 | -0.20325900 | 1.16449700  |
| C | -3.06762200 | -1.34918600 | 1.53439800  |
| C | -1.89909300 | -1.20470700 | 0.53642000  |
| C | -3.02785900 | 0.89969300  | 0.79422700  |
| H | -4.62302800 | -0.46907900 | 0.29713500  |
| H | -4.67203700 | 0.08025000  | 1.98266000  |
| H | -3.52597000 | -2.34237000 | 1.49271400  |
| H | -2.68225200 | -1.20503700 | 2.55070800  |
| H | -0.95756600 | -1.43367600 | 1.05347800  |
| H | -2.63053900 | 1.37187500  | 1.70925800  |
| H | -3.46682400 | 1.68888100  | 0.17714100  |
| N | -2.00202000 | 0.16630000  | 0.04337700  |
| C | -2.03869900 | -2.21397700 | -0.60099500 |
| O | -1.73563400 | -3.37990500 | -0.49689800 |
| O | -2.56122900 | -1.70470500 | -1.72030700 |
| C | -0.83923800 | 0.86314400  | -0.54939000 |
| N | -0.96368000 | 2.28370600  | -0.38461900 |
| C | -0.78539500 | 3.13534600  | -1.53756200 |
| H | 0.27259400  | 3.38862800  | -1.74156800 |
| H | -1.20246700 | 2.66139400  | -2.43203500 |
| H | -1.32282600 | 4.08035600  | -1.38227400 |
| C | -0.49949200 | 2.87354200  | 0.85270900  |
| H | -0.55380300 | 2.14875500  | 1.66881300  |
| H | 0.54773900  | 3.22474800  | 0.79279300  |
| H | -1.12593300 | 3.73909000  | 1.10986200  |
| H | -0.86496500 | 0.68871300  | -1.64840200 |

#### T-TS10-11

|   |             |             |             |
|---|-------------|-------------|-------------|
| N | 0.69837400  | 0.39156200  | -0.59011400 |
| H | -3.08690600 | 0.97893100  | -0.19295000 |
| H | 1.23699000  | 1.13466400  | -1.02948300 |
| C | 2.85301900  | -0.38944200 | 0.18897300  |
| C | 3.23118100  | -1.33533900 | -0.76853900 |
| C | 3.83897800  | 0.39382000  | 0.78974100  |
| C | 4.56900100  | -1.50136700 | -1.10891500 |
| H | 2.46141300  | -1.94021500 | -1.24617800 |
| C | 5.18185200  | 0.23124800  | 0.45103100  |
| H | 3.54953200  | 1.13561800  | 1.53456700  |
| C | 5.54868100  | -0.71778200 | -0.49817300 |
| H | 4.85157000  | -2.24516200 | -1.85051200 |
| H | 5.94033400  | 0.84616800  | 0.93015700  |
| H | 6.59533800  | -0.84938400 | -0.76258600 |
| C | 1.40489200  | -0.19773700 | 0.54039000  |
| H | 1.34590800  | 0.39907700  | 1.46822200  |
| H | 0.93410700  | -1.16869800 | 0.75627500  |
| C | -2.68823100 | -1.32167100 | 1.96419600  |
| C | -2.49679300 | -2.23942800 | 0.75892900  |

|   |             |             |             |
|---|-------------|-------------|-------------|
| C | -2.21454100 | -1.23905300 | -0.36196000 |
| C | -1.65567700 | -0.21079300 | 1.75021500  |
| H | -3.70301400 | -0.90154700 | 1.95384800  |
| H | -2.55616100 | -1.83318200 | 2.92200800  |
| H | -3.35681100 | -2.87998800 | 0.54377400  |
| H | -1.61140100 | -2.87407500 | 0.89154800  |
| H | -1.65994700 | -1.70311500 | -1.19106000 |
| H | -0.72398700 | -0.42015600 | 2.30230500  |
| H | -2.03649000 | 0.76070200  | 2.10073800  |
| N | -1.44321500 | -0.21937400 | 0.30467500  |
| C | -3.53050300 | -0.71380000 | -0.95265100 |
| O | -4.28136300 | -1.41268600 | -1.59268500 |
| O | -3.81912100 | 0.57072100  | -0.70278000 |
| C | -0.70924900 | 0.74612700  | -0.46380300 |
| N | -1.01363000 | 2.12414500  | -0.02906900 |
| C | -0.99495200 | 3.06382400  | -1.14246200 |
| H | 0.01304100  | 3.20092100  | -1.58082100 |
| H | -1.67582300 | 2.73240400  | -1.93417800 |
| H | -1.33800400 | 4.04382100  | -0.79330600 |
| C | -0.18069100 | 2.63198900  | 1.05184400  |
| H | -0.20657200 | 1.97346800  | 1.92484800  |
| H | 0.87686600  | 2.76078000  | 0.74992200  |
| H | -0.56062800 | 3.61161300  | 1.36180900  |
| H | -1.11799400 | 0.69517800  | -1.48656400 |

#### T-TS11-12

|   |             |             |             |
|---|-------------|-------------|-------------|
| N | 0.77388000  | 0.04793300  | -0.58750800 |
| H | -1.93268600 | 1.63401200  | 0.61150500  |
| H | 1.29967900  | 0.77150100  | -1.06076000 |
| C | 3.00729600  | -0.55052600 | 0.10646800  |
| C | 3.60856000  | -0.99029900 | -1.07657400 |
| C | 3.77847100  | 0.12923100  | 1.04949900  |
| C | 4.95789800  | -0.75073700 | -1.31343400 |
| H | 3.00913200  | -1.52690900 | -1.81155600 |
| C | 5.13170100  | 0.36671100  | 0.81649500  |
| H | 3.31659600  | 0.47016500  | 1.97585600  |
| C | 5.72195100  | -0.07087000 | -0.36562800 |
| H | 5.41652600  | -1.09998500 | -2.23539400 |
| H | 5.72418500  | 0.89431600  | 1.55996700  |
| H | 6.77765000  | 0.11438600  | -0.54842100 |
| C | 1.54097700  | -0.78539400 | 0.33458500  |
| H | 1.29332200  | -0.57406100 | 1.38554400  |
| H | 1.29368000  | -1.83863800 | 0.14041900  |
| C | -2.75861200 | -1.96938700 | 1.38517700  |
| C | -3.26678700 | -2.17134900 | -0.03956000 |
| C | -2.77402300 | -0.91257900 | -0.74731400 |
| C | -1.37259200 | -1.35096000 | 1.19541100  |
| H | -3.41007200 | -1.26379100 | 1.91186500  |
| H | -2.71478700 | -2.89643900 | 1.96492100  |
| H | -4.35377100 | -2.27172900 | -0.10554000 |
| H | -2.80823200 | -3.06067300 | -0.49283500 |
| H | -2.67146700 | -1.06291500 | -1.82907900 |
| H | -0.58515800 | -2.11268900 | 1.25254200  |

|   |             |             |             |
|---|-------------|-------------|-------------|
| H | -1.16532900 | -0.58392800 | 1.95390900  |
| N | -1.42879600 | -0.75664000 | -0.15205200 |
| C | -3.77080600 | 0.25318000  | -0.50611000 |
| O | -4.74186200 | 0.25987100  | -1.28152100 |
| O | -3.53522800 | 1.03578700  | 0.45933600  |
| C | -0.58630400 | 0.17652400  | -0.64769100 |
| N | -0.97516500 | 1.87113500  | 0.27596200  |
| C | -1.06454600 | 2.92782900  | -0.72393200 |
| H | -0.11475000 | 3.01128600  | -1.27153300 |
| H | -1.86893200 | 2.69793800  | -1.42988800 |
| H | -1.28119400 | 3.90033300  | -0.26313400 |
| C | -0.03803400 | 2.18373400  | 1.34131100  |
| H | -0.11740600 | 1.44550700  | 2.14442400  |
| H | 0.99056500  | 2.17056400  | 0.95426900  |
| H | -0.22988300 | 3.17978100  | 1.76288000  |
| H | -0.93127600 | 0.58905200  | -1.59950600 |

#### T-TS8-13

|   |             |             |             |
|---|-------------|-------------|-------------|
| N | -0.37493800 | 0.45043300  | -0.53490600 |
| H | -0.82534900 | 0.54193400  | -1.44095400 |
| H | 0.31686000  | -1.09208900 | 0.85176600  |
| C | -2.65819200 | 0.14243800  | 0.23792800  |
| C | -3.76146200 | 0.91552000  | -0.12509700 |
| C | -2.79920800 | -1.24742600 | 0.30955200  |
| C | -4.98831500 | 0.31712000  | -0.40807600 |
| H | -3.65836700 | 1.99912800  | -0.18245100 |
| C | -4.02162800 | -1.84704400 | 0.02779100  |
| H | -1.94339100 | -1.86236300 | 0.58709900  |
| C | -5.11976800 | -1.06599600 | -0.33174900 |
| H | -5.84062300 | 0.93267900  | -0.68652100 |
| H | -4.11960800 | -2.92825300 | 0.09152400  |
| H | -6.07585900 | -1.53672700 | -0.54876700 |
| C | -1.33386000 | 0.79788800  | 0.51838700  |
| H | -0.94660500 | 0.46003500  | 1.49334800  |
| H | -1.48724600 | 1.88437900  | 0.61128400  |
| C | 4.20811200  | -0.42790000 | 0.02817400  |
| C | 3.51339400  | -1.21216800 | -1.07369500 |
| C | 2.05128200  | -1.10307500 | -0.66050100 |
| C | 3.27737400  | 0.76038800  | 0.18038900  |
| H | 4.23965400  | -1.01994700 | 0.95390900  |
| H | 5.23203900  | -0.12963800 | -0.21721800 |
| H | 3.83370800  | -2.25270000 | -1.16806100 |
| H | 3.66097900  | -0.71180600 | -2.04036500 |
| H | 1.37663100  | -1.12968800 | -1.53044000 |
| H | 3.45953500  | 1.48810400  | -0.63013200 |
| H | 3.39739500  | 1.29197000  | 1.13068300  |
| N | 1.91889600  | 0.19000100  | 0.05529700  |
| C | 1.61513000  | -2.27687300 | 0.21606700  |
| O | 2.12986200  | -3.37082100 | 0.19209100  |
| O | 0.56467900  | -2.02473400 | 1.00199100  |
| C | 0.94521800  | 1.09911400  | -0.54623300 |
| N | 1.06511000  | 2.40483600  | 0.04537700  |
| H | 1.18859800  | 1.24075000  | -1.62339300 |

|   |             |            |             |
|---|-------------|------------|-------------|
| C | 0.46190300  | 3.48049700 | -0.70246500 |
| H | 0.85209500  | 4.43927200 | -0.33893900 |
| H | 0.71992100  | 3.39558900 | -1.76516600 |
| H | -0.64219600 | 3.51953500 | -0.62312100 |
| C | 1.01225000  | 2.57523900 | 1.48472000  |
| H | 1.26315500  | 1.63637800 | 1.98686000  |
| H | 1.74314000  | 3.33540000 | 1.79692000  |
| H | 0.02235400  | 2.89928500 | 1.84795100  |

**T-TS13-14**

|   |             |             |             |
|---|-------------|-------------|-------------|
| N | 0.52974900  | 0.57607000  | 0.67630600  |
| H | 1.11671900  | 0.91490600  | 1.43234500  |
| H | -3.21522500 | 0.36847500  | -0.75880000 |
| C | 2.63331600  | -0.03647900 | -0.33779900 |
| C | 3.75410000  | 0.75761200  | -0.09237700 |
| C | 2.76657600  | -1.42686100 | -0.30080500 |
| C | 4.99055300  | 0.17666900  | 0.18363300  |
| H | 3.65366500  | 1.84326200  | -0.12225500 |
| C | 3.99925900  | -2.01110500 | -0.03019200 |
| H | 1.89336700  | -2.05156000 | -0.48775000 |
| C | 5.11420500  | -1.20945300 | 0.21408000  |
| H | 5.85702600  | 0.80657700  | 0.37123000  |
| H | 4.09301900  | -3.09441900 | -0.01088600 |
| H | 6.07834000  | -1.66695600 | 0.42355900  |
| C | 1.29424600  | 0.60208900  | -0.57215400 |
| H | 0.74347000  | 0.05627100  | -1.35282600 |
| H | 1.44571700  | 1.62345400  | -0.95720200 |
| C | -3.12752700 | -1.43969000 | 1.76757000  |
| C | -1.99617000 | -2.12719400 | 1.01307100  |
| C | -1.62873400 | -1.07151800 | -0.03372200 |
| C | -2.59511900 | -0.02264000 | 1.88139700  |
| H | -4.05766800 | -1.46932900 | 1.18340600  |
| H | -3.33402300 | -1.88311800 | 2.74630100  |
| H | -2.26089600 | -3.08848400 | 0.56318700  |
| H | -1.13416500 | -2.27661300 | 1.67716100  |
| H | -0.58351600 | -1.17662300 | -0.33758900 |
| H | -1.87987700 | 0.02704900  | 2.72160000  |
| H | -3.36870600 | 0.73590900  | 2.05255600  |
| N | -1.88978600 | 0.22852900  | 0.60255400  |
| C | -2.49863900 | -1.25580300 | -1.27586000 |
| O | -2.40601800 | -2.21731500 | -2.00488600 |
| O | -3.39491700 | -0.28814500 | -1.47706900 |
| C | -0.79095300 | 1.20364500  | 0.75018600  |
| N | -1.03823100 | 2.39528700  | -0.04047900 |
| H | -0.85464000 | 1.56016900  | 1.78967100  |
| C | -0.26358400 | 3.54075500  | 0.38125600  |
| H | -0.67458700 | 4.44674900  | -0.08036300 |
| H | -0.32802100 | 3.66056500  | 1.47004600  |
| H | 0.80888300  | 3.48778300  | 0.10828100  |
| C | -1.17265300 | 2.30935800  | -1.48239200 |
| H | -1.63530200 | 1.36566200  | -1.78130400 |
| H | -1.82617100 | 3.11831100  | -1.83510300 |
| H | -0.21531500 | 2.40012000  | -2.02363400 |

**T-TS14-15**

|   |             |             |             |
|---|-------------|-------------|-------------|
| N | -0.62219800 | 0.92805300  | -0.69628400 |
| H | -1.08084400 | 1.70679900  | -1.15673000 |
| H | 3.33576900  | -0.22744600 | -0.86274700 |
| C | -2.70943900 | 0.18182200  | 0.33248000  |
| C | -3.71750300 | 0.79464900  | 1.07665000  |
| C | -3.06290300 | -0.79672300 | -0.60144900 |
| C | -5.05332000 | 0.43721900  | 0.89851700  |
| H | -3.45360200 | 1.56178900  | 1.80410200  |
| C | -4.39316000 | -1.15798500 | -0.78159900 |
| H | -2.28034000 | -1.27056600 | -1.19252000 |
| C | -5.39388900 | -0.54051400 | -0.03067200 |
| H | -5.82763900 | 0.92730200  | 1.48429900  |
| H | -4.65246400 | -1.92405300 | -1.50895500 |
| H | -6.43478200 | -0.82174400 | -0.17243800 |
| C | -1.26455700 | 0.55423000  | 0.55150500  |
| H | -0.73182900 | -0.31390900 | 0.95989400  |
| H | -1.22547900 | 1.33382000  | 1.33177000  |
| C | 1.38649000  | -2.70341300 | -0.68748600 |
| C | 1.27575100  | -2.22441400 | 0.75727100  |
| C | 1.78672400  | -0.78139700 | 0.66849800  |
| C | 0.92542600  | -1.48302300 | -1.47093200 |
| H | 2.43062000  | -2.94518700 | -0.93037300 |
| H | 0.78181200  | -3.59072100 | -0.89713600 |
| H | 1.84208500  | -2.81984300 | 1.47934300  |
| H | 0.22257400  | -2.22787000 | 1.07053600  |
| H | 1.35793500  | -0.13058500 | 1.44010000  |
| H | -0.17396100 | -1.44078300 | -1.52743700 |
| H | 1.31135200  | -1.45506700 | -2.49861500 |
| N | 1.45095700  | -0.34790700 | -0.69747800 |
| C | 3.29859600  | -0.74355100 | 0.90087600  |
| O | 3.80162300  | -1.01723100 | 1.96732900  |
| O | 4.01612900  | -0.41822100 | -0.17174200 |
| C | 0.80737500  | 0.94336500  | -0.91000800 |
| N | 1.61205400  | 1.95959800  | -0.20609500 |
| H | 0.89766800  | 1.14147100  | -1.99539700 |
| C | 2.48462400  | 2.66748000  | -1.12664500 |
| H | 3.19295500  | 3.28739500  | -0.56712900 |
| H | 3.06964000  | 1.96201100  | -1.72741500 |
| H | 1.92293200  | 3.32271500  | -1.82229100 |
| C | 0.90662700  | 2.88464600  | 0.65744600  |
| H | 0.12929300  | 3.47845800  | 0.13859000  |
| H | 0.44191400  | 2.36996600  | 1.50324600  |
| H | 1.63563400  | 3.58711400  | 1.07489500  |

**T-TS15-16**

|   |             |             |             |
|---|-------------|-------------|-------------|
| N | -0.48183900 | 0.25799200  | -1.09088100 |
| H | -1.14712600 | 0.95354000  | -1.40786200 |
| H | 0.94910700  | 1.27028500  | 1.19825000  |
| C | -2.56596100 | -0.52094000 | -0.09844100 |
| C | -3.28520400 | -0.79488600 | -1.26661200 |
| C | -3.26067800 | -0.13953200 | 1.05041900  |

|   |             |             |             |
|---|-------------|-------------|-------------|
| C | -4.67115200 | -0.67935600 | -1.28659000 |
| H | -2.75106500 | -1.11023600 | -2.16270400 |
| C | -4.64959100 | -0.03023200 | 1.03434100  |
| H | -2.70828800 | 0.06185100  | 1.96773400  |
| C | -5.35674000 | -0.29640900 | -0.13458300 |
| H | -5.21980200 | -0.89914700 | -2.19952000 |
| H | -5.17888700 | 0.26150600  | 1.93831600  |
| H | -6.44066100 | -0.21213000 | -0.14792100 |
| C | -1.06908300 | -0.64717900 | -0.08413000 |
| H | -0.78756000 | -1.68143900 | -0.31691500 |
| H | -0.67801400 | -0.42499700 | 0.91819700  |
| C | 4.17354200  | -0.48147900 | -0.71423700 |
| C | 3.39397800  | -1.78128100 | -0.55268300 |
| C | 1.98084600  | -1.31094800 | -0.18951500 |
| C | 3.18264600  | 0.38821400  | -1.46424900 |
| H | 4.39159500  | -0.04243300 | 0.26931500  |
| H | 5.11807600  | -0.60168100 | -1.25319100 |
| H | 3.78667600  | -2.45320700 | 0.21390600  |
| H | 3.37858400  | -2.32427800 | -1.50745400 |
| H | 1.24153800  | -2.01165100 | -0.59730100 |
| H | 3.19856600  | 0.16192400  | -2.54314500 |
| H | 3.35883600  | 1.46209500  | -1.34392300 |
| N | 1.88846500  | -0.01541300 | -0.89254400 |
| C | 1.77534200  | -1.27602800 | 1.35310700  |
| O | 1.82087300  | -2.39852300 | 1.88245500  |
| O | 1.57778700  | -0.16086400 | 1.91391600  |
| C | 0.79910400  | 0.76207500  | -1.04840700 |
| N | 0.79164100  | 1.99595800  | 0.46841700  |
| H | 0.94086700  | 1.56478400  | -1.77894000 |
| C | 1.94872800  | 2.88122800  | 0.44030200  |
| H | 1.91558600  | 3.60340700  | 1.26687400  |
| H | 2.86003400  | 2.28632200  | 0.54741300  |
| H | 1.97815600  | 3.44232800  | -0.50462600 |
| C | -0.46250200 | 2.71936900  | 0.59547400  |
| H | -1.29674000 | 2.02399300  | 0.72982200  |
| H | -0.44667800 | 3.40352300  | 1.45424900  |
| H | -0.63960300 | 3.31528700  | -0.31165800 |

#### T-TS12-17

|   |             |             |             |
|---|-------------|-------------|-------------|
| N | -0.72662400 | -0.12822100 | -0.74273400 |
| H | 2.09535200  | -1.94424600 | 0.12121600  |
| H | -1.23808800 | -0.74085600 | -1.36977500 |
| C | -2.92289700 | 0.04743400  | 0.27741200  |
| C | -3.48522900 | 1.07850700  | -0.48112700 |
| C | -3.75217100 | -0.95175800 | 0.78586900  |
| C | -4.85405300 | 1.10881600  | -0.72345200 |
| H | -2.84010600 | 1.85945400  | -0.88181800 |
| C | -5.12532400 | -0.92080300 | 0.54843400  |
| H | -3.31996800 | -1.76062000 | 1.37360200  |
| C | -5.67759200 | 0.10849500  | -0.20724500 |
| H | -5.28187700 | 1.91636000  | -1.31277800 |
| H | -5.76181700 | -1.70441300 | 0.95210700  |
| H | -6.74816100 | 0.13355600  | -0.39530100 |



|   |             |             |             |
|---|-------------|-------------|-------------|
| C | -1.44172100 | 0.02005100  | 0.53078600  |
| H | -1.20384700 | -0.80155600 | 1.22614000  |
| H | -1.13385500 | 0.95262900  | 1.01400500  |
| C | 2.79270600  | 1.82495600  | 1.14859200  |
| C | 3.45502500  | 1.74303800  | -0.22361500 |
| C | 2.95695600  | 0.39345900  | -0.72654500 |
| C | 1.39193600  | 1.26137200  | 0.90984600  |
| H | 3.33978600  | 1.19225000  | 1.85976000  |
| H | 2.76176700  | 2.83730300  | 1.56102400  |
| H | 4.54492300  | 1.78367500  | -0.18786300 |
| H | 3.08671600  | 2.54058400  | -0.88121900 |
| H | 2.98982200  | 0.31301900  | -1.82213000 |
| H | 0.67151700  | 2.06331400  | 0.69737200  |
| H | 1.02715100  | 0.67667700  | 1.76535800  |
| N | 1.55488400  | 0.42032800  | -0.28340800 |
| C | 3.82181000  | -0.75837600 | -0.15971000 |
| O | 5.03749500  | -0.61891400 | -0.20155700 |
| O | 3.22603000  | -1.80389300 | 0.31448800  |
| C | 0.62282500  | -0.36797000 | -0.84689500 |
| H | 0.90539500  | -0.72678100 | -1.83597600 |
| H | 0.39391100  | -2.19907400 | 0.66128300  |
| O | 0.88896500  | -2.07211300 | -0.15744500 |

#### T-TS17-18

|   |             |             |             |
|---|-------------|-------------|-------------|
| N | 0.70013200  | -0.52485400 | 0.80400500  |
| H | -2.74496200 | -2.05691800 | -0.03433100 |
| H | 1.14084500  | -0.73440100 | 1.69266400  |
| C | 2.92491000  | -0.36348600 | -0.18929600 |
| C | 3.13721400  | 0.99324700  | 0.07627100  |
| C | 4.03168900  | -1.19870200 | -0.34494500 |
| C | 4.42786000  | 1.50142200  | 0.17884700  |
| H | 2.27722800  | 1.64868600  | 0.20762000  |
| C | 5.32653600  | -0.69284700 | -0.24487900 |
| H | 3.87567100  | -2.25798000 | -0.54584200 |
| C | 5.52756200  | 0.65875500  | 0.01780600  |
| H | 4.57875900  | 2.55904100  | 0.38405700  |
| H | 6.17804100  | -1.35816000 | -0.36752900 |
| H | 6.53632900  | 1.05673800  | 0.09955300  |
| C | 1.53352100  | -0.91636500 | -0.32896900 |
| H | 1.57261600  | -2.00786700 | -0.45776900 |
| H | 1.07059900  | -0.52146800 | -1.24644300 |
| C | -2.26031700 | 2.27304100  | -0.64205200 |
| C | -3.17741000 | 1.82307300  | 0.48887000  |
| C | -2.91488800 | 0.32321700  | 0.58280200  |
| C | -1.01206500 | 1.45068100  | -0.38390200 |
| H | -2.69641700 | 2.00947100  | -1.61534600 |
| H | -2.06278700 | 3.34870100  | -0.64040100 |
| H | -4.23588400 | 2.02571200  | 0.31073900  |
| H | -2.88195100 | 2.30789800  | 1.42715000  |
| H | -2.90327500 | -0.01960100 | 1.62813300  |
| H | -0.42647600 | 1.84517800  | 0.45862900  |
| H | -0.34537400 | 1.34840900  | -1.24597000 |
| N | -1.54336500 | 0.12510600  | 0.00067300  |

|   |             |             |             |
|---|-------------|-------------|-------------|
| C | -3.97256600 | -0.53557300 | -0.12439600 |
| O | -5.03863300 | -0.08247000 | -0.47208300 |
| O | -3.68770400 | -1.82410900 | -0.26965300 |
| C | -0.66345500 | -0.90987900 | 0.78386800  |
| H | -1.03035900 | -0.94691300 | 1.82345200  |
| H | -1.45897100 | -0.90644500 | -0.67610300 |
| O | -1.02273100 | -1.96608900 | -0.01515900 |

**T-TS16-19**

|   |             |             |             |
|---|-------------|-------------|-------------|
| N | 0.49552300  | -1.13607400 | 0.15811800  |
| H | 1.13925800  | -1.66521100 | 0.73713800  |
| H | -1.44824700 | 0.52985500  | 1.70984000  |
| C | 2.53129700  | 0.14416400  | -0.15746500 |
| C | 3.14981100  | -0.51996600 | -1.22095300 |
| C | 3.32194300  | 0.71843700  | 0.83768500  |
| C | 4.53603000  | -0.60555700 | -1.28817500 |
| H | 2.53393000  | -0.96951700 | -1.99933400 |
| C | 4.71165600  | 0.63762300  | 0.77034800  |
| H | 2.84320900  | 1.23520300  | 1.66822400  |
| C | 5.32002300  | -0.02516900 | -0.29139500 |
| H | 5.00809100  | -1.12039100 | -2.12176200 |
| H | 5.31809400  | 1.09358800  | 1.54925000  |
| H | 6.40420000  | -0.08809200 | -0.34591700 |
| C | 1.03279200  | 0.21645300  | -0.08070800 |
| H | 0.63853900  | 0.60644800  | -1.02549800 |
| H | 0.73292600  | 0.90223700  | 0.72331600  |
| C | -4.20359900 | -0.61484300 | -0.41990500 |
| C | -3.40970000 | 0.04374600  | -1.54331100 |
| C | -2.04253800 | 0.26175400  | -0.89546900 |
| C | -3.18878200 | -1.54814100 | 0.23533900  |
| H | -4.53586000 | 0.14723100  | 0.29660100  |
| H | -5.09053600 | -1.14940900 | -0.77126700 |
| H | -3.83770600 | 0.98247500  | -1.90207500 |
| H | -3.30049500 | -0.64129400 | -2.39327900 |
| H | -1.26433800 | 0.35503300  | -1.66077400 |
| H | -3.26006000 | -2.57585200 | -0.14737600 |
| H | -3.30396600 | -1.58242000 | 1.32742000  |
| N | -1.87937400 | -0.98184000 | -0.13851600 |
| C | -2.04577500 | 1.56107000  | -0.06164500 |
| O | -2.25901400 | 2.60266300  | -0.66820300 |
| O | -1.84843600 | 1.49226200  | 1.21785300  |
| C | -0.79203400 | -1.38440500 | 0.55516000  |
| H | -0.90912200 | -2.38270100 | 0.97735200  |
| O | -0.89578800 | -0.49627600 | 2.17669200  |
| H | -1.48180100 | -0.95197600 | 2.79314500  |

**T-TS19-20**

|   |             |             |             |
|---|-------------|-------------|-------------|
| N | 0.43609100  | -1.03786400 | -0.35151000 |
| H | 1.00142400  | -1.49551600 | -1.05702100 |
| H | -1.42616200 | -0.50253900 | 1.96345000  |
| C | 2.57350200  | -0.09780300 | 0.29536700  |
| C | 2.68789000  | 1.16368600  | -0.29478600 |
| C | 3.70754600  | -0.90554700 | 0.38870400  |

|   |             |             |             |
|---|-------------|-------------|-------------|
| C | 3.91292200  | 1.61068000  | -0.77831600 |
| H | 1.80610300  | 1.80046700  | -0.36564500 |
| C | 4.93700600  | -0.46210800 | -0.09512400 |
| H | 3.62478800  | -1.88813800 | 0.85255700  |
| C | 5.04113000  | 0.79664300  | -0.67988900 |
| H | 3.99153500  | 2.59802000  | -1.22763800 |
| H | 5.81418300  | -1.09945500 | -0.01150800 |
| H | 6.00002700  | 1.14770300  | -1.05390800 |
| C | 1.24459300  | -0.59244200 | 0.78984800  |
| H | 0.72292300  | 0.22047500  | 1.31353600  |
| H | 1.38643900  | -1.40110200 | 1.52116700  |
| C | -3.77243100 | 0.14631400  | -1.67183600 |
| C | -2.81883900 | 1.27093400  | -1.27939100 |
| C | -1.92716100 | 0.64119300  | -0.20403100 |
| C | -2.86854200 | -1.06774000 | -1.59433600 |
| H | -4.58633800 | 0.05453900  | -0.94040300 |
| H | -4.21854900 | 0.28098500  | -2.66146400 |
| H | -3.31588900 | 2.16746400  | -0.90173900 |
| H | -2.20646700 | 1.55924700  | -2.14207800 |
| H | -0.86424900 | 0.87353100  | -0.39038500 |
| H | -2.17721600 | -1.09566700 | -2.45204400 |
| H | -3.38326800 | -2.03141000 | -1.52591600 |
| N | -2.08774200 | -0.82965900 | -0.36440000 |
| C | -2.23014900 | 1.12925800  | 1.21553800  |
| O | -2.76249100 | 2.19718000  | 1.41564300  |
| O | -1.82133900 | 0.37197300  | 2.23002400  |
| C | -0.78872400 | -1.70583000 | -0.12367000 |
| H | -0.89832300 | -2.52622800 | -0.85707200 |
| O | -1.12620000 | -2.02686400 | 1.16199000  |
| H | -2.22161500 | -1.49146800 | 0.67776000  |
